# Supplementary material for: Internal acidity scale and reactivity evaluation of chiral phosphoric acids with different 3,3′-substituents in Brønsted acid catalysis
Source: PubMed Central journal article supplement — Chem Sci. 2019 Sep 6;10(43):10025–34. doi: 10.1039/c9sc02342a (PMC6977555; doi:10.1039/c9sc02342a), 2019-09-06
Supplement: SC-010-C9SC02342A-s001.pdf [file SC-010-C9SC02342A-s001.pdf]

# Internal Acidity Scale and Reactivity Evaluation of Chiral Phosphoric Acids with Different 3,3'-Substituents in Brønsted Acid Catalysis

Kerstin Rothermel, Maxime Melikian, Johnny Hioe, Julian Greindl, Johannes Gramüller, Matej Žabka, Nils Sorgenfrei, Thomas Hausler, Fabio Morana and Ruth M. Gschwind\*

Institut für Organische Chemie,  
Universität Regensburg, D-93053 Regensburg, Germany

E-mail : ruth.gschwind@chemie.uni-regensburg.de

## Supplementary Material

|       |                                                                                                     |   |
|-------|-----------------------------------------------------------------------------------------------------|---|
| 1.    | Experimental data .....                                                                             | 3 |
| 1.1   | Chemistry .....                                                                                     | 3 |
| 1.2   | Synthesis of Imine Substrates .....                                                                 | 3 |
| 1.2.1 | Exemplary procedure for (E)-1-(4-methoxyphenyl)-N-phenylethan-1-imine (98% <sup>15</sup> N) 5 ..... | 3 |
| 1.2.2 | (E)-1-(4-bromophenyl)-N-phenylethan-1-imine (98 % <sup>15</sup> N) 2 .....                          | 4 |
| 1.2.3 | (E)-1-(4-methylphenyl)-N-phenylethan-1-imine (98% <sup>15</sup> N) 3 .....                          | 4 |
| 1.2.4 | (E)-N-phenyl-1-(4-(trifluoromethyl)phenyl)ethan-1-imine (98% <sup>15</sup> N) 4 .....               | 4 |
| 1.2.5 | (E)-1-(4-fluorophenyl)-N-phenylethan-1-imine (98 % <sup>15</sup> N) 6 .....                         | 5 |
| 1.2.6 | (E)-1-(naphthalen-2-yl)-N-phenylethan-1-imine (98% <sup>15</sup> N) 7 .....                         | 5 |
| 1.2.7 | (E)-N-phenyl-1-(3',4',5'-(trimethoxy)phenyl)ethan-1-imine (98% <sup>15</sup> N) 8 .....             | 6 |
| 1.2.8 | (E)-N-phenyl-1-(4-( <i>tert</i> -butyl)phenyl)ethan-1-imine (98% <sup>15</sup> N) 9 .....           | 7 |
| 1.3   | Sample preparation of binary complexes in CD <sub>2</sub> Cl <sub>2</sub> .....                     | 7 |
| 2     | Spectrometer data .....                                                                             | 8 |
| 2.1   | Pulse programs .....                                                                                | 8 |
| 2.2   | Acquisition Parameters .....                                                                        | 8 |
| 3     | Steiner-Limbach correlation .....                                                                   | 9 |

|      |                                                                                                                      |     |
|------|----------------------------------------------------------------------------------------------------------------------|-----|
| 3.1  | Theory .....                                                                                                         | 9   |
| 3.2  | Referencing of the $^{15}\text{N}$ chemical shift .....                                                              | 11  |
| 3.3  | Steiner-Limbach correlation curve: experimental $^1\text{H}$ and $^{15}\text{N}$ chemical shifts .....               | 11  |
| 3.4  | Plot of $^1J_{\text{HN}}$ against $\delta_{\text{OHN}}$ .....                                                        | 13  |
| 3.5  | Plot of $^1J_{\text{HN}}$ against $\delta_{\text{OHN}}$ .....                                                        | 14  |
| 3.6  | Enlarged section of the Steiner-Limbach curve.....                                                                   | 15  |
| 4    | Comparison of the calculated and experimental $^1hJ_{\text{NH}}$ .....                                               | 16  |
| 5    | Plots of $^1J_{\text{NH}}$ vs. Hammett $\sigma_{\text{para}}$ constants for <i>E</i> - and <i>Z</i> -complexes ..... | 17  |
| 6    | Calculation of the external pKa values .....                                                                         | 18  |
| 7    | Reaction kinetics of the transfer hydrogenation.....                                                                 | 19  |
| 7.1  | Procedure for the in-situ kinetics .....                                                                             | 19  |
| 7.2  | Procedure for the ex-situ kinetics .....                                                                             | 19  |
| 7.3  | Kinetics of the transfer hydrogenation with imine 5.....                                                             | 20  |
| 7.4  | Procedure for the in-situ kinetics of a non-isomerizable imine reaction .....                                        | 22  |
| 8    | Amount of free imine in the $^1\text{H}$ spectra.....                                                                | 24  |
| 9    | Formation of the binary complex .....                                                                                | 27  |
| 10   | Reactivity at 180 K and 220 K of TRIM/imine complex with Hantzsch Ester .....                                        | 28  |
| 11   | Determination of the <i>E</i> -to- <i>Z</i> -isomerization rates .....                                               | 29  |
| 11.1 | Sample preparation .....                                                                                             | 30  |
| 11.2 | Decay curves.....                                                                                                    | 31  |
| 12   | Investigations on the ternary complex of TRIP, imine 5 and Hantzsch ester .....                                      | 33  |
| 13   | Investigations on the ternary complex of TRIM, imine 5 and Hantzsch ester.....                                       | 34  |
| 14   | Barrier of the hydride transfer .....                                                                                | 36  |
| 15   | Solubility of Hantzsch ester in toluene.....                                                                         | 37  |
| 16   | Computational details .....                                                                                          | 38  |
| 17   | Optimized geometry of most stable conformations .....                                                                | 39  |
| 18   | References.....                                                                                                      | 105 |

## 1. Experimental data

### 1.1 Chemistry

Deuterated solvents were purchased from Deutero or Sigma Aldrich. When anhydrous solvents were required,  $\text{CD}_2\text{Cl}_2$  was freshly distilled over  $\text{CaH}_2$  under argon atmosphere. The catalysts were purchased from Sigma Aldrich or synthesized from the corresponding binaphthols according to the procedure of Klusmann et al.<sup>1</sup>

### 1.2 Synthesis of Imine Substrates

The imines were prepared according to a modified literature procedure.<sup>2-7</sup> The toluene was used either in p.A. quality or was dried by refluxing over sodium. The  $^{15}\text{N}$ -enriched aniline for the presented syntheses below was purchased from Euriso-top GmbH and Sigma Aldrich. For the preparation of imines **10-13** see reference.<sup>2</sup>

#### 1.2.1 Exemplary procedure for (E)-1-(4-methoxyphenyl)-N-phenylethan-1-imine (98% $^{15}\text{N}$ ) **5**

For the syntheses of the imines, the same procedure was used as in our previous publication.<sup>2</sup>

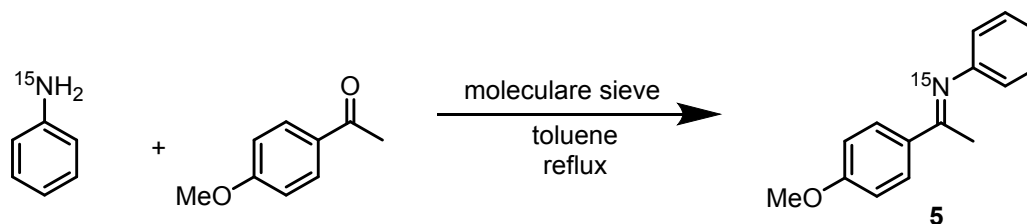

Molecular sieves 4 Å (1.625 g) were weighed into a 25 ml Schlenk flask equipped with a reflux condenser and a stopper. The setup was connected to a vacuum line and was evacuated and dried with a heat gun. 4-Methoxyacetophenone (0.500 g, 3.33 mmol) and Aniline (98%  $^{15}\text{N}$ , 0.31 ml, 0.316 g, 3.35 mmol) were added to the Schlenk flask under argon atmosphere and were dissolved in 5 ml toluene. The stop cock was exchanged with a drying tube filled with  $\text{CaCl}_2$  and the solution was heated to reflux overnight. The orange solution was filtered off from the molecular sieves and was concentrated under reduced pressure. The remaining solid was recrystallized from methanol. The product was obtained as yellow solid (0.303 g, 1.33 mmol, 40%) and predominantly as *E*-isomer (>99 % via  $^1\text{H}$ -NMR analysis).

**$^1\text{H}$ -NMR** (400.1 MHz,  $\text{CD}_2\text{Cl}_2$ )  $\delta_{\text{H}}$  = 7.95 (m, 2H, Aryl-H), 7.35 (m, 2H, Aryl-H), 7.07 (m, 1H, Aryl-H), 6.96 (m, 2H, Aryl-H), 6.77 (m, 2H, Aryl-H), 3.86 (s, 3H,  $-\text{OCH}_3$ ), 2.18 ppm (d,  $^3J_{\text{HN}}$  = 1.76 Hz,  $-\text{CH}_3$ )

**$^{13}\text{C}$ -NMR {1H}** (100.6 MHz,  $\text{CD}_2\text{Cl}_2$ ):  $\delta_{\text{C}}$  = 164.5 (d,  $^1J_{\text{NC}}$  = 7.1 Hz), 161.9, 152.5 (d,  $^2J_{\text{NC}}$  = 1.7 Hz), 132.5 (d,  $^1J_{\text{NC}}$  = 8.4 Hz), 129.3, 129.2 (d,  $^3J_{\text{NC}}$  = 3.3 Hz), 123.2, 119.9 (d,  $^2J_{\text{NC}}$  = 2.3 Hz), 113.9, 55.8, 17.2 ppm (d,  $^2J_{\text{NC}}$  = 2.7 Hz)

**$^{15}\text{N}$ -NMR** (40.5 MHz,  $\text{CD}_2\text{Cl}_2$ ):  $\delta_{\text{N}}$  = 325.5 ppm

$^1\text{H}$ - and  $^{13}\text{C}$ -spectra were in accordance with the literature.<sup>8</sup>

### 1.2.2 (E)-1-(4-bromophenyl)-N-phenylethan-1-imine (98 % <sup>15</sup>N) 2

For the syntheses of the imines, the same procedure was used as in our previous publication.<sup>2</sup>

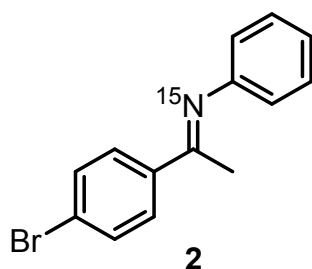

The reaction was carried out on 4.32 mmol scale.

The remaining yellow-orange residue was dissolved in 1 ml MeOH under gentle heating (water bath 60°C) and was stored in the fridge (~ 4°C). The crystallized product was sucked off over a Büchner funnel and was washed with ice-cold MeOH. Solvent residues were removed under reduced pressure. The product was obtained as almost yellow crystalline solid (0.438 g, 38 %) and predominantly as *E*-isomer (~ 99% via <sup>1</sup>H-NMR analysis).

**<sup>1</sup>H-NMR** (400.1 MHz, CD<sub>2</sub>Cl<sub>2</sub>) δ<sub>H</sub> = 7.87 (2H, m, Aryl-H), 7.59 (2H, m, Aryl-H), 7.36 (2H, m, Aryl-H), 7.09 (1H, m, Aryl-H), 6.77 (2H, m, Aryl-H), 2.20 ppm (3H, d, <sup>3</sup>J<sub>NH</sub> = 1.8 Hz, -CH<sub>3</sub>)

**<sup>13</sup>C-NMR {1H}** (100.6 MHz, CD<sub>2</sub>Cl<sub>2</sub>): δ<sub>C</sub> = 164.5 (d, <sup>1</sup>J<sub>CN</sub> = 7.2 Hz), 151.9 (<sup>1</sup>J<sub>CN</sub> = 1.5 Hz), 138.9 (d, <sup>2</sup>J<sub>CN</sub> = 8.6 Hz), 131.8, 129.3, 129.2 (d, 3.3 Hz), 125.2, 123.6, 119.6 (2.3 Hz), 17.3 (d, <sup>2</sup>J<sub>CN</sub> = 2.8 Hz)

**<sup>15</sup>N-NMR** (40.5 MHz, CD<sub>2</sub>Cl<sub>2</sub>): δ<sub>N</sub> = 333.4 ppm

<sup>1</sup>H- and <sup>13</sup>C-spectra were in accordance with the literature.<sup>9</sup>

### 1.2.3 (E)-1-(4-methylphenyl)-N-phenylethan-1-imine (98% <sup>15</sup>N) 3

For the syntheses of the imines, the same procedure was used as in our previous publication.<sup>2</sup>

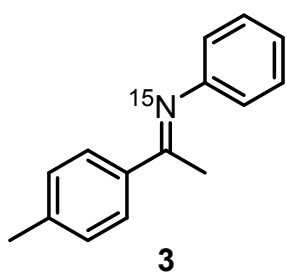

The reaction was carried out on 3.73 mmol scale.

The solidified residue was washed with cooled MeOH (~-35°C). After drying under reduced pressure over CaCl<sub>2</sub>, the product was obtained as orange crystals (0.220 g, 1.05 mmol, 28 %) predominantly as *E*-isomer (>99 % via <sup>1</sup>H-NMR analysis). The product was used without further purification.

**<sup>1</sup>H-NMR** (400.1 MHz, CD<sub>2</sub>Cl<sub>2</sub>) δ<sub>H</sub> = 7.87 (m, 2H, Aryl-H), 7.34 (m, 2H, Aryl-H), 7.26 (m, 2H, Aryl-H), 7.07 (m, 1H, Aryl), 6.76 (m, 2H), 2.41 (s, 3H, -CH<sub>3</sub>), 2.19 ppm (d, <sup>3</sup>J<sub>HN</sub> = 1.76 Hz, 3H, -CH<sub>3</sub>)

**<sup>13</sup>C-NMR {1H}** (100.6 MHz, CD<sub>2</sub>Cl<sub>2</sub>): δ<sub>C</sub> = 165.3, 152.4, 141.2, 133.9, 129.5, 129.3, 127.5, 123.3, 119.7, 21.5, 17.4 ppm

**<sup>15</sup>N-NMR** (40.5 MHz, CD<sub>2</sub>Cl<sub>2</sub>): δ<sub>N</sub> = 328.9 ppm

<sup>1</sup>H- and <sup>13</sup>C-spectra were in accordance with the literature.<sup>5</sup>

### 1.2.4 (E)-N-phenyl-1-(4-(trifluoromethyl)phenyl)ethan-1-imine (98% <sup>15</sup>N) 4

For the syntheses of the imines, the same procedure was used as in our previous publication.<sup>2</sup>

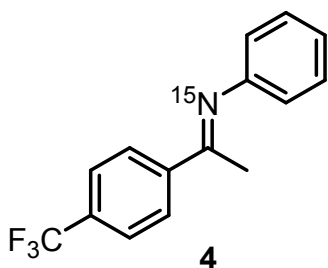

The reaction was carried out on 1.59 mmol scale.

The obtained yellow solid was further dried in the desiccator over KOH. The product was obtained as yellow solid (0.306, 1.16 mmol, 72 %) predominantly as *E*-isomer (>99 % via <sup>1</sup>H-NMR analysis). The product was used without further purification.

**<sup>1</sup>H-NMR** (400.1 MHz, CD<sub>2</sub>Cl<sub>2</sub>): δ<sub>H</sub> = 8.11 (m, 2H, Aryl-H), 7.73 (m, 2H, Aryl-H), 7.38 (m, 2H, Aryl-H), 7.12 (m, 1H, Aryl-H), 6.80 (m, 2H, Aryl-H), 2.25 ppm (d, <sup>3</sup>J<sub>NH</sub> = 1.8 Hz, 3H, -CH<sub>3</sub>)

**<sup>13</sup>C-NMR {1H}** (100.6 MHz, CD<sub>2</sub>Cl<sub>2</sub>): δ<sub>C</sub> = 164.5, 152.0, 143.2, 132.1, 129.4, 128.0, 125.6, 124.6, 123.9, 119.5, 17.5 ppm

**<sup>19</sup>F-NMR {1H}** (376 MHz, CD<sub>2</sub>Cl<sub>2</sub>): δ<sub>F</sub> = - 63.1 ppm

**<sup>15</sup>N-NMR** (60.8 MHz, CD<sub>2</sub>Cl<sub>2</sub>): δ<sub>N</sub> = 338.2 ppm

<sup>1</sup>H- and <sup>13</sup>C-spectra were in accordance with the literature.<sup>5</sup>

### 1.2.5 (E)-1-(4-fluorophenyl)-N-phenylethan-1-imine (98 % <sup>15</sup>N) 6

For the syntheses of the imines, the same procedure was used as in our previous publication.<sup>2</sup>

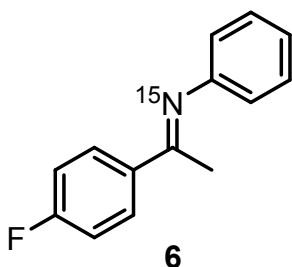

The reaction was carried out on 4.32 mmol scale.

The remaining yellow-orange residue was dissolved in 1 ml MeOH under gentle heating (water bath 60°C) and was stored in the fridge (~ 4°C). The crystallized product was washed with ice-cold MeOH. Solvent residues were removed under reduced pressure. The product was obtained as almost colorless/slightly yellowish crystalline solid (0.248 g, 27 %) and predominantly as *E*-isomer (~ 99% via <sup>1</sup>H-NMR analysis).

**<sup>1</sup>H-NMR** (400.1 MHz, CD<sub>2</sub>Cl<sub>2</sub>) δ<sub>H</sub> = 8.00 (2H, m, Aryl-H), 7.35 (2H, m, Aryl-H), 7.14 (2H, m, Aryl-H), 7.09 (1H, m, Aryl-H), 6.77 (2H, m, Aryl-H), 2.20 ppm (3H, d, <sup>3</sup>J<sub>NH</sub> = 1.8 Hz, -CH<sub>3</sub>)

**<sup>13</sup>C-NMR {1H}** (100.6 MHz, CD<sub>2</sub>Cl<sub>2</sub>): δ<sub>C</sub> = 164.6, 164.3, 152.1, 136.2, 129.7, 129.3, 123.5, 119.6, 115.5, 17.4 ppm

**<sup>15</sup>N-NMR** (40.54 MHz, CD<sub>2</sub>Cl<sub>2</sub>): δ<sub>N</sub> = 330.9 ppm

<sup>1</sup>H- and <sup>13</sup>C-spectra were in accordance with the literature.<sup>8</sup>

### 1.2.6 (E)-1-(naphthalen-2-yl)-N-phenylethan-1-imine (98% <sup>15</sup>N) 7

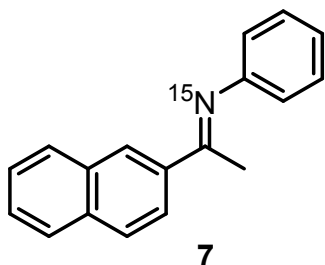

For the syntheses of the imines, the same procedure was used as in our previous publication.<sup>2</sup>

The reaction was carried out on 4.33 mmol scale.

The intensive orange solution was cooled down and was quickly filtered off from the molecular sieves. The product started crystallizing at r.t. Crystallization was completed in an ice bath for 2 h. The yellow crystals were sucked off with a Büchner funnel and were washed with ice-cold toluene. The liquid residue was concentrated under reduced pressure and the resulting solid was suspended in 2.5 ml methanol and was shortly heated at 60°C in a water bath. After cooling down, the yellow solid was sucked off with a Büchner funnel and washed with ice cold methanol. Solvent residues were removed under reduced pressure. The product was obtained as yellow solid (0.489 g, 1.99 mmol, 45 % yield) predominantly as *E*-isomer (>99 % via <sup>1</sup>H-NMR analysis).

**<sup>1</sup>H-NMR** (400.1 MHz, CD<sub>2</sub>Cl<sub>2</sub>) δ<sub>H</sub> = 8.37 (s, 1H, Aryl-H), 8.24 (dd, <sup>3</sup>J<sub>HN</sub> = 8.68 Hz, <sup>4</sup>J = 1.64 Hz, 1H, Aryl-H) 7.99 – 7.94 (m, 1H, Aryl-H), 7.94 – 7.87 (m, 2H, Aryl-H), 7.60 – 7.52 (m, 2H, Aryl-H), 7.42 – 7.35 (m, 2H, Aryl-H), 7.11 (m, 1H, Aryl-H), 6.83 (m, 2H, Aryl-H), 2.34 ppm (d, <sup>3</sup>J<sub>HN</sub> = 1.76 Hz, 3H, -CH<sub>3</sub>)

**<sup>13</sup>C-NMR {1H}** (100.6 MHz, CD<sub>2</sub>Cl<sub>2</sub>): δ<sub>C</sub> = 165.3, 152.3, 137.3, 134.8, 133.3, 129.3, 129.2, 128.2, 128.1, 128.0, 127.6, 126.7, 124.6, 123.5, 119.7, 17.4 ppm

**<sup>15</sup>N-NMR** (40.5 MHz, CD<sub>2</sub>Cl<sub>2</sub>): δ<sub>N</sub> = 333.5 ppm

<sup>1</sup>H- and <sup>13</sup>C-spectra were in accordance with the literature.<sup>8</sup>

### 1.2.7 (E)-N-phenyl-1-(3',4',5'-(trimethoxy)phenyl)ethan-1-imine (98% <sup>15</sup>N) 8

For the syntheses of the imines, the same procedure was used than in our previous publication.<sup>2</sup>

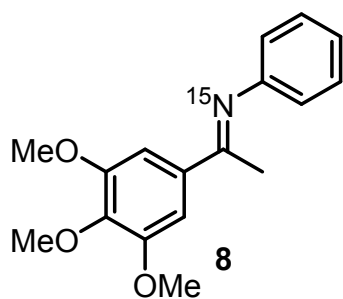

To the mixture of 3,4,5-Trimethoxyacetophenone (0.486 g, 2.30 mmol) and Aniline (98% <sup>15</sup>N, 0.22 ml, 2.30 mmol) additionally sodium bicarbonate (1g, 11.9 mmol) was added. The reaction was carried out in 2.30 mmol scale.

The solidified residue was washed with cooled MeOH (~-35°C). After drying under reduced pressure, the product was obtained as colorless solid (0.140 g, 0.49 mmol, 21 %) predominantly as *E*-isomer (>99 % via <sup>1</sup>H-NMR analysis). The product was used without further purification.

**<sup>1</sup>H-NMR** (400.1 MHz, CD<sub>2</sub>Cl<sub>2</sub>) δ<sub>H</sub> = 7.35 (m, 2H, Aryl-H), 7.24 (s, 2H, Aryl-H), 7.08 (m, 1H, Aryl-H), 6.76 (m, 2H, Aryl-H), 3.91 (s, 6H, OCH<sub>3</sub>), 3.83 (s, 3H, -OCH<sub>3</sub>), 2.19 ppm (d, <sup>3</sup>J<sub>HN</sub> = 1.75 Hz, 3H, -CH<sub>3</sub>)

**<sup>13</sup>C-NMR {1H}** (100.6 MHz, CD<sub>2</sub>Cl<sub>2</sub>): δ<sub>C</sub> = 164.9, 153.8, 152.3, 140.8, 135.5, 129.7, 123.8, 120.0, 105.4, 61.4, 56.9, 17.8

**<sup>15</sup>N-NMR** (40.5 MHz, CD<sub>2</sub>Cl<sub>2</sub>): δ<sub>N</sub> = 329.7 ppm

### 1.2.8 (E)-N-phenyl-1-(4-(tert-butyl)phenyl)ethan-1-imine (98% <sup>15</sup>N) 9

For the syntheses of the imines, the same procedure was used than in our previous publication.<sup>2</sup>

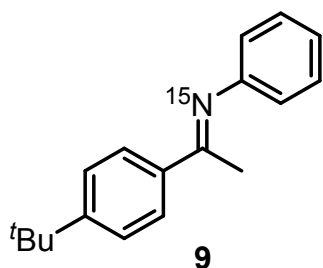

The reaction was carried out in 2.84 mmol scale.

The solidified residue was recrystallized in 0,4 ml ethanol and washed with cooled MeOH (~-35°C). After drying under reduced pressure, the product was obtained as colorless crystals (0.160 g, 0.63 mmol, 22 %) predominantly as *E*-isomer (>99 % via <sup>1</sup>H-NMR analysis). The product was used without further purification.

**<sup>1</sup>H-NMR** (400.1 MHz, CD<sub>2</sub>Cl<sub>2</sub>) δ<sub>H</sub> = 7.91 (m, 2H, Aryl-H), 7.48 (m, 2H, Aryl-H), 7.35 (m, 2H, Aryl-H), 7.07 (m, 1H, Aryl-H), 6.76 (m, 2H, Aryl-H), 2.20 (d, <sup>3</sup>J<sub>HN</sub> = 1.83 Hz, 3H, -CH<sub>3</sub>), 1.34 (s, 9H, *tert*-Butyl)

**<sup>13</sup>C-NMR {<sup>1</sup>H}** (100.6 MHz, CD<sub>2</sub>Cl<sub>2</sub>): δ<sub>C</sub> = 165.9, 154.9, 153.1, 137.9, 129.6, 128.0, 126.3, 124.0, 120.4, 35.7, 32.0, 18.1 ppm

**<sup>15</sup>N-NMR** (40.5 MHz, CD<sub>2</sub>Cl<sub>2</sub>): δ<sub>N</sub> = 329.4 ppm

<sup>1</sup>H- and <sup>13</sup>C-spectra were in accordance with the literature.<sup>5</sup>

### 1.3 Sample preparation of binary complexes in CD<sub>2</sub>Cl<sub>2</sub>

The catalyst was dried for 30 min at 150°C under reduced pressure. Ketimine and phosphoric acid catalyst were directly weighed into a 5 mm NMR tube under an inert argon atmosphere. CD<sub>2</sub>Cl<sub>2</sub> (0.6 ml) and 1.0 ml of tetramethylsilane atmosphere were added to the tube. The sample was stored in an -80°C freezer. For all samples a 1:1 ratio of catalyst/ketimine was used. Even after careful sample preparation, partial hydrolysis of the imine could not be completely prevented. Therefore the imine/CPA-ratios are slightly different from 1:1. A concentration of 25 mmol or 50 mmol/L was used for all samples, depending on solubility at low temperatures.

## 2 Spectrometer data

NMR experiments were performed on Bruker Avance III HD 400 MHz spectrometer, equipped with 5 mm BBO BB-1H/D probe head with Z-Gradients and a Bruker Avance III HD 600 MHz spectrometer, equipped with a 5 mm TBI  $^1\text{H}/^{31}\text{P}$  and a 5 mm CPPBBO BB- $^1\text{H}/^{19}\text{F}$ . Triple resonance experiments were performed on the TBI probe head. The temperature was controlled in the VT-experiments by BVT 3000 and BVTE 3900. For NMR measurements employing standard NMR solvents, 5 mm NMR tubes were used, if not otherwise noted. NMR data were processed, evaluated and plotted with TopSpin 3.2 software. Further plotting of the spectra was performed with Corel Draw X7, X8 or 2017 software.  $^1\text{H}$  and  $^{13}\text{C}$  chemical shifts were referenced to TMS or the respective solvent signals. The heteronuclear  $^{15}\text{N}$  and  $^{19}\text{F}$  spectra were referenced, employing  $\nu(X) = \nu(\text{TMS}) \times \Xi_{\text{reference}} / 100 \%$  according to Harris *et al.*<sup>10</sup> The following frequency ratios and reference compounds were used:  $\Xi(^{15}\text{N}) = 10.132912$  (lq.  $\text{NH}_3$ ) and  $\Xi(^{19}\text{F}) = 94.094011$  ( $\text{CCl}_3\text{F}$ )

### 2.1 Pulse programs

All pulse programs used are standard Bruker NMR pulse programs.

### 2.2 Acquisition Parameters

$^1\text{H}$ -NMR: Pulse program: zg; Relaxation delay = 2 – 3 s, Acquisition time = 2.48 s, SW = 22.0 ppm, TD = 64k, NS = 8 – 64; zg30; Relaxation delay = 2 s, Acquisition time = 2.48 s, SW = 22.0 ppm, TD = 64k, NS = 8 – 64;

$^{15}\text{N}$ -NMR: Pulse program: zg; Relaxation delay = 10.00 s, Acquisition time = 0.54 s, SW = 502.8 ppm, TD = 32k, NS = 256 – 2048;

$^{13}\text{C}$ -NMR: Pulse program: zgpg30; Relaxation delay = 2.00 s, Acquisition time = 0.80 s, SW = 270.0 ppm, TD = 64k, NS = 1k – 2k;

$^{19}\text{F}$ -NMR: Pulse program: zg30; Relaxation delay = 2 – 3 s, Acquisition time = 11.60 s, SW = 10.0 ppm, TD = 128k, NS = 8 – 64;



### 3 Steiner-Limbach correlation

#### 3.1 Theory

All investigations regarding the hydrogen bond analysis were done in accordance with our previous work on TRIP/imine complexes.<sup>2</sup>

The <sup>1</sup>H and <sup>15</sup>N chemical shifts of an OHN hydrogen bond can be correlated by multiplication of the constants  $\delta(\underline{\text{OH}})^\circ$ ,  $\delta(\underline{\text{HN}})^\circ$ ,  $\delta(\underline{\text{HN}})^\circ$  and  $\delta(\underline{\text{N}})^\circ$  with the defined valence bond orders  $p_{\text{OH}}^{\text{H}}$  (equation S1 and S2).  $\delta(\underline{\text{OH}})^\circ$ ,  $\delta(\underline{\text{HN}})^\circ$ ,  $\delta(\underline{\text{HN}})^\circ$  and  $\delta(\underline{\text{N}})^\circ$  reflect the <sup>1</sup>H respectively <sup>15</sup>N chemical shifts of the isolated diatomic units.<sup>11,12</sup>

$$\delta(\underline{\text{OHN}}) = \delta(\underline{\text{OH}})^\circ p_{\text{OH}}^{\text{H}} + \delta(\underline{\text{HN}})^\circ p_{\text{HN}}^{\text{H}} + 4 \delta(\underline{\text{OHN}})^* p_{\text{OH}}^{\text{H}} p_{\text{HN}}^{\text{H}} \quad (\text{S1})$$

$$\delta(\underline{\text{OHN}})_{\text{ref}} = \delta(\underline{\text{N}})^\circ p_{\text{OH}}^{\text{H}} + \delta(\underline{\text{HN}})^\circ p_{\text{HN}}^{\text{H}} + 4 \delta(\underline{\text{OHN}})^* p_{\text{OH}}^{\text{H}} p_{\text{HN}}^{\text{H}} \quad (\text{S2})$$

$\delta(\underline{\text{HN}})^\circ$  and  $\delta(\underline{\text{HN}})^\circ$  are the <sup>15</sup>N, respectively <sup>1</sup>H chemical shift of the completely protonated imine and are experimentally accessible.  $\delta(\underline{\text{OH}})^\circ$  is the chemical shift of the free phosphoric acid (CPA). Because of dimerization and remaining water,  $\delta(\underline{\text{OH}})^\circ$  has to be fitted.  $\delta(\underline{\text{N}})^\circ$  takes into account the referencing of the <sup>15</sup>N chemical shift (see chapter 3.2). To consider the asymmetry of the OHN hydrogen bond compared to symmetric XHX hydrogen bond, the correction factors  $\delta(\underline{\text{OHN}})^*$  and  $\delta(\underline{\text{OHN}})^*$  are used (for values see table S1). These parameters were slightly modified compared to our previous publication.<sup>2</sup>

**Table S 1:** NMR parameters used for the hydrogen-bond correlations.

| systems                                                                | $\delta(\underline{\text{N}})^\circ$<br>[ppm] | $\delta(\underline{\text{HN}})^\circ$<br>[ppm] | $\delta(\underline{\text{OHN}})^*$<br>[ppm] | $\delta(\underline{\text{OH}})^\circ$<br>[ppm] | $\delta(\underline{\text{HN}})^\circ$<br>[ppm] | $\delta(\underline{\text{OHN}})^*$<br>[ppm] |
|------------------------------------------------------------------------|-----------------------------------------------|------------------------------------------------|---------------------------------------------|------------------------------------------------|------------------------------------------------|---------------------------------------------|
| pyridine–HA <sup>11</sup> in<br>CDF <sub>3</sub> /CDF <sub>2</sub> Cl  | 0                                             | 126                                            | -4                                          | 2                                              | 7                                              | 20                                          |
| collidine–HA <sup>11</sup> in<br>CDF <sub>3</sub> /CDF <sub>2</sub> Cl | 0                                             | 126                                            | -8                                          | 2                                              | 7                                              | 20                                          |
| solid collidine–HA <sup>13</sup>                                       | 0                                             | 126                                            | 0                                           | -3                                             | 7                                              | 20                                          |
| imine/TRIP <sup>2</sup>                                                | 0                                             | -170                                           | -6                                          | 2                                              | 6                                              | 16                                          |
| imine/TiPSY, imine/TRIFP<br>and imine/TRIM                             | 0                                             | -151.6                                         | -4.89                                       | 1.04                                           | 12.33                                          | 14.2                                        |

To consider the zero anharmonic vibrations of the hydrogen atom within the hydrogen bond Limbach and Denisov proposed the correction factors for the valence bond orders  $p_{\text{OH}}^{\text{H}}$  and  $p_{\text{NH}}^{\text{H}}$  (equation S3 and S4).<sup>11,12,14</sup> For explanation and details of these terms see reference.<sup>14</sup>

$$p_{\text{OH}}^{\text{H}} = p_{\text{OH}} - c^{\text{H}} (p_{\text{OH}} p_{\text{HN}})^f (p_{\text{OH}} - p_{\text{HN}}) - d^{\text{H}} (p_{\text{OH}} p_{\text{HN}})^g \quad (\text{S3})$$

$$p_{\text{HN}}^{\text{H}} = p_{\text{HN}} + c^{\text{H}} (p_{\text{OH}} p_{\text{HN}})^f (p_{\text{OH}} - p_{\text{HN}}) - d^{\text{H}} (p_{\text{OH}} p_{\text{HN}})^g \quad (\text{S4})$$

After a mathematically fitting the parameters  $d^{\text{H}}$ ,  $c^{\text{H}}$ ,  $f$  and  $g$  were slightly modified in comparison to our previous work (table S2).<sup>2,11</sup>

**Table S 2:** Correction factors used for the hydrogen-bond correlations.

| systems                                                                             | f   | g    | c <sup>H</sup> | d <sup>H</sup> |
|-------------------------------------------------------------------------------------|-----|------|----------------|----------------|
| weak and medium strong OHN bonds <sup>11</sup>                                      | 0   | 0    | 0              | 0              |
| pyridine/HA and collidine/HA <sup>11</sup> in CDF <sub>3</sub> /CDF <sub>2</sub> Cl | 5   | 2    | 360            | 0.7            |
| pyridine/HA and collidine/HA solid <sup>13</sup>                                    | 5   | 2    | 360            | 0.7            |
| imine/TRIP <sup>2</sup>                                                             | 8   | 2    | 360            | 0.3            |
| imine/TiPSY, imine/TRIFP and imine/TRIM                                             | 7.3 | 1.36 | 349.9          | 0.33           |

In accordance with Limbach and Denisov, the measured NMR data of the hydrogen bonds were correlated with their geometries by using the concept of valence bond orders of Pauling.<sup>11,12,15</sup> The valence bond orders for the hydrogen bonds of the proton and the heavy atoms within an OHN hydrogen bond are given by  $p_{OH}^H$  (equation S5) and  $p_{NH}^H$  (equation S6). Both values are dependent on the atom distances ( $r_{OH}$  and  $r_{NH}$ ).

$$p_{OH}^H = \exp\left\{\frac{-(r_{OH} - r_{OH}^\circ)}{b_{OH}}\right\} \quad (S5)$$

$$p_{NH}^H = \exp\left\{\frac{-(r_{NH} - r_{NH}^\circ)}{b_{NH}}\right\} \quad (S6)$$

$$p_{OH}^H + p_{NH}^H = 1 \quad (S7)$$

### 3.2 Referencing of the $^{15}\text{N}$ chemical shift

As proposed in the literature, the  $^{15}\text{N}$  chemical shifts were referenced to the chemical shift of the non-hydrogen bonded imine **11** ( $\delta^{15}\text{N} = 340.8$  ppm, 300 K,  $\text{CD}_2\text{Cl}_2$ ).<sup>12</sup> Thus, the  $^{15}\text{N}$  chemical shifts reflect the deviation of the complexed imines from their neutral form ( $\delta^{15}\text{N} = \sim 330$  ppm) and range from -90 to -150 ppm. Because of this correction  $\delta(\text{N})^\circ$  can be set to 0.

### 3.3 Steiner-Limbach correlation curve: experimental $^1\text{H}$ and $^{15}\text{N}$ chemical shifts

**Table S 3:** NMR parameters ( $\delta^1\text{H}$  and  $\delta^{15}\text{N}$  chemical shift as well as  $^1J_{\text{NH}}$ ) of  $\text{HBF}_4/\text{imine}$ , TRIP/imine, carboxylic acids and phenol/imine complexes in  $\text{CD}_2\text{Cl}_2$ . All values are obtained from literature.<sup>2</sup>

| Complex                     | $\delta^1\text{H}$<br>[ppm] | $\delta^{15}\text{N}$<br>[ppm] | $^1J_{\text{NH}}$<br>[Hz] | Solvent                       | T [K] | Ref.             |
|-----------------------------|-----------------------------|--------------------------------|---------------------------|-------------------------------|-------|------------------|
| $\text{HBF}_4/3E$           | 12.35                       | 189.4                          | 92.3                      | $\text{CD}_2\text{Cl}_2$      | 180   | TMS              |
| $\text{HBF}_4/3Z$           | 12.48                       | 193.4                          | 91.9                      | $\text{CD}_2\text{Cl}_2$      | 180   | TMS              |
| $\text{HBF}_4/5E$           | 12.23                       | 182.8                          | 92.5                      | $\text{CD}_2\text{Cl}_2$      | 180   | TMS              |
| $\text{HBF}_4/5Z$           | 12.26                       | 188.2                          | 92.6                      | $\text{CD}_2\text{Cl}_2$      | 180   | TMS              |
| R-TRIP/2E                   | 17.68                       | 224.3                          | 75.4                      | $\text{CD}_2\text{Cl}_2$      | 180   | TMS              |
| R-TRIP/2Z                   | 17.68                       | 221.1                          | n.d.                      | $\text{CD}_2\text{Cl}_2$      | 180   | TMS              |
| R-TRIP/3E                   | 17.07                       | 216.0                          | 79.2                      | $\text{CD}_2\text{Cl}_2$      | 180   | $\text{CHDCl}_2$ |
| R-TRIP/3Z                   | 17.11                       | 215.0                          | 78.4                      | $\text{CD}_2\text{Cl}_2$      | 180   | $\text{CHDCl}_2$ |
| R-TRIP/4E                   | 18.20                       | 235.1                          | 68.7                      | $\text{CD}_2\text{Cl}_2$      | 180   | TMS              |
| R-TRIP/4Z                   | 18.20                       | 228.0                          | 74.8 <sup>[a]</sup>       | $\text{CD}_2\text{Cl}_2$      | 180   | TMS              |
| R-TRIP/5E                   | 16.47                       | 206.6                          | 82.2                      | $\text{CD}_2\text{Cl}_2$      | 180   | TMS              |
| R-TRIP/5Z                   | 16.75                       | 209.1                          | 81.0                      | $\text{CD}_2\text{Cl}_2$      | 180   | TMS              |
| R-TRIP/6E                   | 17.42                       | 220.6                          | 77.3                      | $\text{CD}_2\text{Cl}_2$      | 180   | TMS              |
| R-TRIP/6Z                   | 17.42                       | 217.9                          | n.d.                      | $\text{CD}_2\text{Cl}_2$      | 180   | TMS              |
| R-TRIP/10E                  | 18.42                       | 243.3                          | 67.7                      | $\text{CD}_2\text{Cl}_2$      | 180   | TMS              |
| R-TRIP/10Z1                 | 18.18                       | 228.9                          | 74.3                      | $\text{CD}_2\text{Cl}_2$      | 180   | TMS              |
| R-TRIP/10Z2                 | 18.13                       | 228.7                          | 75.2                      | $\text{CD}_2\text{Cl}_2$      | 180   | TMS              |
| R-TRIP/11E                  | 17.70                       | 268.1                          | n.d.                      | $\text{CD}_2\text{Cl}_2$      | 180   | TMS              |
| R-TRIP/11Z                  | 17.93                       | 264.1                          | 41.7                      | $\text{CD}_2\text{Cl}_2$      | 170   | TMS              |
| R-TRIP/11Z                  | 18.85                       | 240.6                          | 60.6                      | $\text{CD}_2\text{Cl}_2$      | 180   | TMS              |
| R-TRIP/12                   | 17.35                       | 225.5                          | 77.0                      | $\text{CD}_2\text{Cl}_2$      | 200   | TMS              |
| R-TRIP/13E                  | 17.31                       | 223.6                          | 78.1                      | $\text{CD}_2\text{Cl}_2$      | 180   | TMS              |
| R-TRIP/13Z                  | 17.07                       | 221.7                          | 79.3                      | $\text{CD}_2\text{Cl}_2$      | 180   | TMS              |
| 4-NO <sub>2</sub> -Phenol/3 | 13.43                       | 299.3                          | n.d.                      | $\text{CDCl}_2\text{F}^{[b]}$ | 130   | TMS              |
| 4-Cl-Phenol /5              | 11.81                       | 299.7                          | n.d.                      | $\text{CDCl}_2\text{F}^{[b]}$ | 130   | TMS              |
| 3,5-Cl-Phenol/5             | 12.25                       | 297.1                          | n.d.                      | $\text{CDCl}_2\text{F}^{[b]}$ | 130   | TMS              |
| 3-CF <sub>3</sub> -Phenol/5 | 11.96                       | 299.0                          | n.d.                      | $\text{CDCl}_2\text{F}^{[b]}$ | 130   | TMS              |
| Acetic Acid/5               | 14.60                       | 294.3                          | n.d.                      | $\text{CDCl}_2\text{F}^{[b]}$ | 130   | TMS              |
| TMA/5                       | 14.34                       | 295.8                          | n.d.                      | $\text{CDCl}_2\text{F}^{[b]}$ | 130   | TMS              |

<sup>[a]</sup>derived from HN-HMBC <sup>[b]</sup> Freonic mixture;  $\text{CDCl}_2\text{F}/\text{CDClF}_2$  ratio slightly varies between samples. For sample preparation, see reference.<sup>2</sup>

**Table S 4:** NMR parameters ( $\delta^1\text{H}$  and  $\delta^{15}\text{N}$  chemical shift as well as  $^1J_{\text{NH}}$ ) of TRIFP/imine, TiPSY/imine and TRIM/imine complexes in  $\text{CD}_2\text{Cl}_2$ .

| Complex     | $\delta^1\text{H}$<br>[ppm] | $\delta^{15}\text{N}$<br>[ppm] | $^1J_{\text{NH}}$<br>[Hz] | Solvent                  | T [K] | Ref. |
|-------------|-----------------------------|--------------------------------|---------------------------|--------------------------|-------|------|
| R-TRIFP/2E  | 16.49                       | 210.6                          | 82.8                      | $\text{CD}_2\text{Cl}_2$ | 170   | TMS  |
| R-TRIFP/2Z  | 16.96                       | 215.2                          | 81.1                      | $\text{CD}_2\text{Cl}_2$ | 170   | TMS  |
| R-TRIFP/3E  | 15.95                       | 204.2                          | 85.1                      | $\text{CD}_2\text{Cl}_2$ | 170   | TMS  |
| R-TRIFP/3Z  | 16.50                       | 209.9                          | 82.7                      | $\text{CD}_2\text{Cl}_2$ | 170   | TMS  |
| R-TRIFP/4E  | 17.09                       | 218.2                          | 80.8                      | $\text{CD}_2\text{Cl}_2$ | 170   | TMS  |
| R-TRIFP/4Z  | 17.39                       | 220.4                          | 80.5                      | $\text{CD}_2\text{Cl}_2$ | 170   | TMS  |
| R-TRIFP/5E  | 15.39                       | 196.4                          | 86.0                      | $\text{CD}_2\text{Cl}_2$ | 170   | TMS  |
| R-TRIFP/5Z  | 16.11                       | 204.4                          | 85.1                      | $\text{CD}_2\text{Cl}_2$ | 170   | TMS  |
| R-TRIFP/6E  | 16.18                       | 207.1                          | 83.0                      | $\text{CD}_2\text{Cl}_2$ | 170   | TMS  |
| R-TRIFP/6Z  | 16.79                       | 213.1                          | 82.3                      | $\text{CD}_2\text{Cl}_2$ | 170   | TMS  |
| R-TiPSY/2E* | 16.79                       | 219.6                          | 77.3                      | $\text{CD}_2\text{Cl}_2$ | 180   | TMS  |
| R-TiPSY/2Z* | 17.16                       | 222.7                          | 73.9                      | $\text{CD}_2\text{Cl}_2$ | 180   | TMS  |
| R-TiPSY/3E  | 16.12                       | 211.3                          | 81.2                      | $\text{CD}_2\text{Cl}_2$ | 180   | TMS  |
| R-TiPSY/3Z  | 16.64                       | 216.6                          | 78.1                      | $\text{CD}_2\text{Cl}_2$ | 180   | TMS  |
| R-TiPSY/4E  | 17.32                       | 228.3                          | 73.1                      | $\text{CD}_2\text{Cl}_2$ | 180   | TMS  |
| R-TiPSY/4Z  | 17.56                       | 228.3                          | 71.8                      | $\text{CD}_2\text{Cl}_2$ | 180   | TMS  |
| R-TiPSY/5E  | 15.53                       | 203.6                          | 83.7                      | $\text{CD}_2\text{Cl}_2$ | 180   | TMS  |
| R-TiPSY/5Z  | 16.24                       | 211.3                          | 80.0                      | $\text{CD}_2\text{Cl}_2$ | 180   | TMS  |
| R-TiPSY/6E  | 16.50                       | 216.3                          | 79.2                      | $\text{CD}_2\text{Cl}_2$ | 180   | TMS  |
| R-TiPSY/6Z  | 17.00                       | 220.6                          | 76.0                      | $\text{CD}_2\text{Cl}_2$ | 180   | TMS  |
| R-TiPSY/7E  | 16.30                       | 212.0                          | 81.4                      | $\text{CD}_2\text{Cl}_2$ | 180   | TMS  |
| R-TiPSY/7Z  | 16.90                       | 218.8                          | 77.2                      | $\text{CD}_2\text{Cl}_2$ | 180   | TMS  |
| R-TiPSY/8E  | 15.78                       | 207.8                          | 83.5                      | $\text{CD}_2\text{Cl}_2$ | 180   | TMS  |
| R-TiPSY/8Z  | 16.74                       | 218.3                          | 77.0                      | $\text{CD}_2\text{Cl}_2$ | 180   | TMS  |
| R-TiPSY/9E  | 16.13                       | 212.0                          | 81.7                      | $\text{CD}_2\text{Cl}_2$ | 180   | TMS  |
| R-TiPSY/9Z  | 16.60                       | 218.8                          | 77.7                      | $\text{CD}_2\text{Cl}_2$ | 180   | TMS  |
| R-TRIM/3E   | 16.26                       | 208.0                          | 83.9                      | $\text{CD}_2\text{Cl}_2$ | 180   | TMS  |
| R-TRIM/3Z   | 16.72                       | 211.5                          | 80.9                      | $\text{CD}_2\text{Cl}_2$ | 180   | TMS  |
| R-TRIM/4E   | 17.51                       | 224.6                          | 77.3                      | $\text{CD}_2\text{Cl}_2$ | 180   | TMS  |
| R-TRIM/4Z   | 17.76                       | 224.1                          | 76.0                      | $\text{CD}_2\text{Cl}_2$ | 180   | TMS  |
| R-TRIM/5E   | 15.80                       | 200.5                          | 85.4                      | $\text{CD}_2\text{Cl}_2$ | 180   | TMS  |
| R-TRIM/5Z   | 16.31                       | 206.0                          | 82.2                      | $\text{CD}_2\text{Cl}_2$ | 180   | TMS  |

\*this complex showed precipitation inside the NMR tube

### 3.4 Plot of $^1J_{\text{HN}}$ against $\delta_{\text{OHN}}$

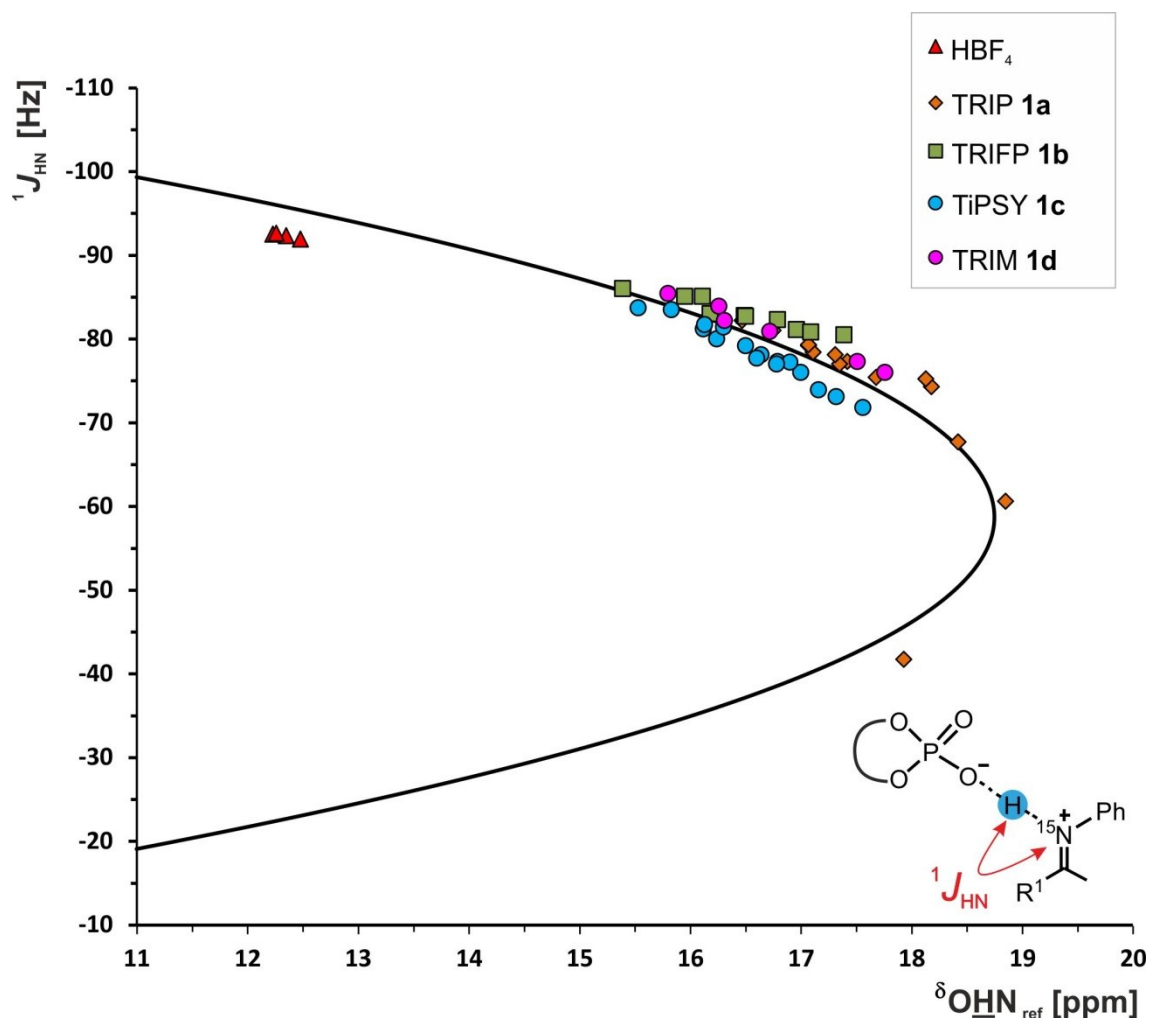

Figure S 1: Plot of  $^1J_{\text{HN}}$  values against  $\delta(\text{OHN})$ . Experimental  $\delta(\text{OHN})/ ^1J_{\text{HN}}$  pair values derived from TiPSY/imine complexes (blue), TRIFP/imine complexes (green), TRIM/imine (pink), TRIP/imine complexes<sup>2</sup> (orange) and  $\text{HBF}_4/\text{imine}^2$  (red).

Measurements of scalar couplings  $^1J_{\text{NH}}$  in CPA/imine complexes were also performed. Also, the  $^1\text{H}$  chemical shift and scalar coupling are related to one another according to the following equation S10:<sup>11,12</sup>

$$^1J(\text{OHN}) = ^1J(\text{HN})^{\circ} p_{\text{HN}^{\text{H}}} - 8^1J(\text{OHN})^* (p_{\text{OH}^{\text{H}}})^2 p_{\text{HN}^{\text{H}}} \quad (\text{S10})$$

Three clusters appeared corresponding to each of the four investigated catalysts. The complexes formed with TRIP have overall higher  $^1\text{H}$  chemical shift values (~16.5 ppm to ~18.5 ppm) compared to the complexes formed with TiPSY, TRIM, and TRIFP. This indicates the formation of a stronger hydrogen bond. Differences in  $^1\text{H}$  chemical shifts between the other three catalysts are smaller. Still, higher  $^1\text{H}$  shift values were found for complexes involving TiPSY and TRIM compared to the TRIFP/imine-complexes.

On the other hand, the separation between TiPSY, TRIM and TRIFP clusters is mainly due to the  $^1J_{\text{NH}}$  values (for values see table S3 and S4). Consistently higher  $^1J_{\text{NH}}$  values (smaller in absolute values) were obtained with TiPSY complexes followed by TRIM and TRIFP. Since the focus of the curve (right side of the plot) corresponds to the shorter hydrogen bonds, complexes formed with TiPSY are overall slightly stronger than complexes formed with TRIM and TRIFP.

### 3.5 Plot of $^1J_{\text{HN}}$ against $\delta_{\text{OHN}}$

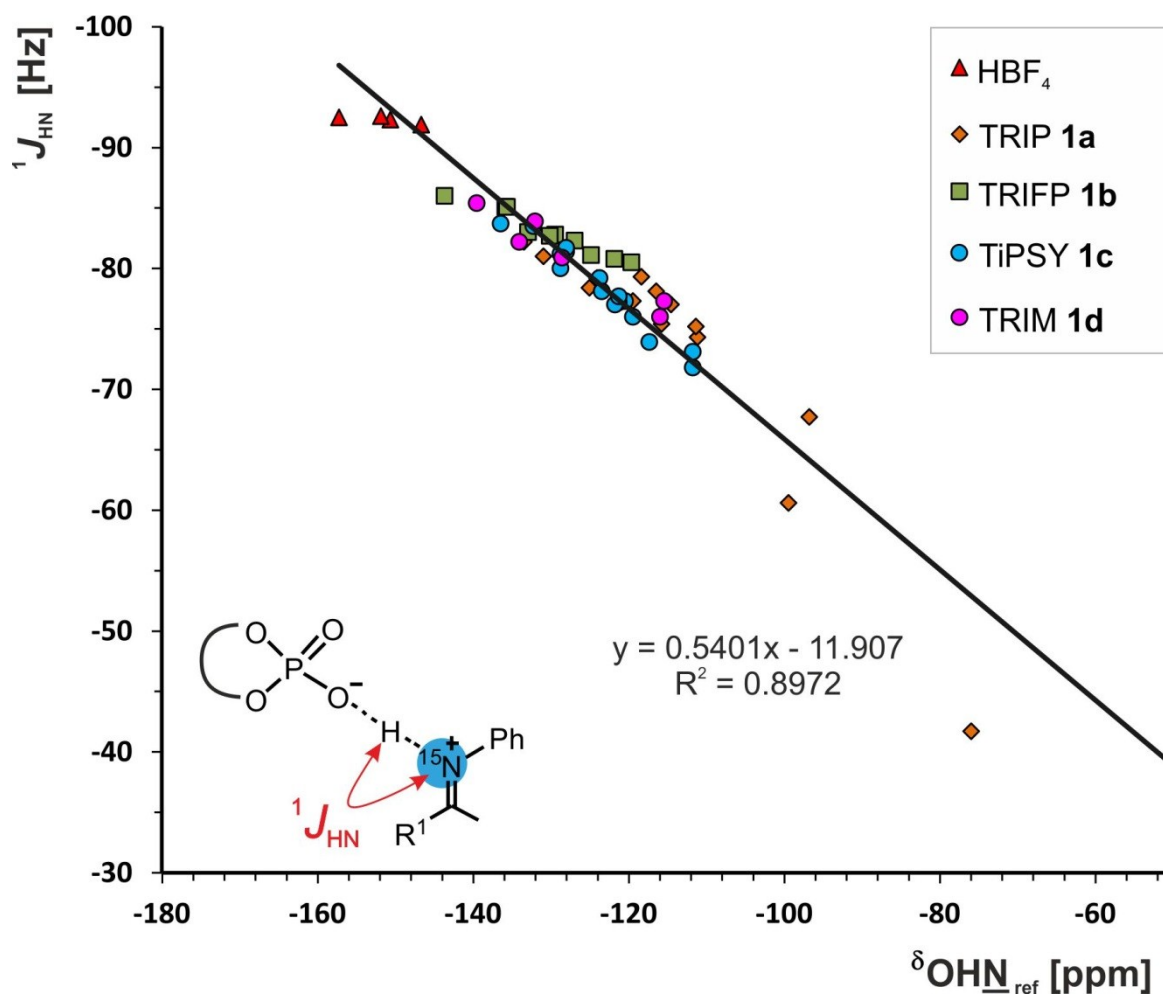

Figure S 2: Plot of  $^1J_{\text{HN}}$  values against  $\delta_{\text{OHN}}$ . Experimental  $\delta_{\text{OHN}}/^1J_{\text{HN}}$  pairs derived from TiPSY/imine complexes (blue), TRIFP/imine complexes (green), TRIM/imine (pink), TRIP/imine complexes<sup>2</sup> (orange) and HBF<sub>4</sub>/imine<sup>2</sup> (red).  $\delta_{\text{OHN}}$  was referenced to 11 (340 ppm, 300K).

### 3.6 Enlarged section of the Steiner-Limbach curve

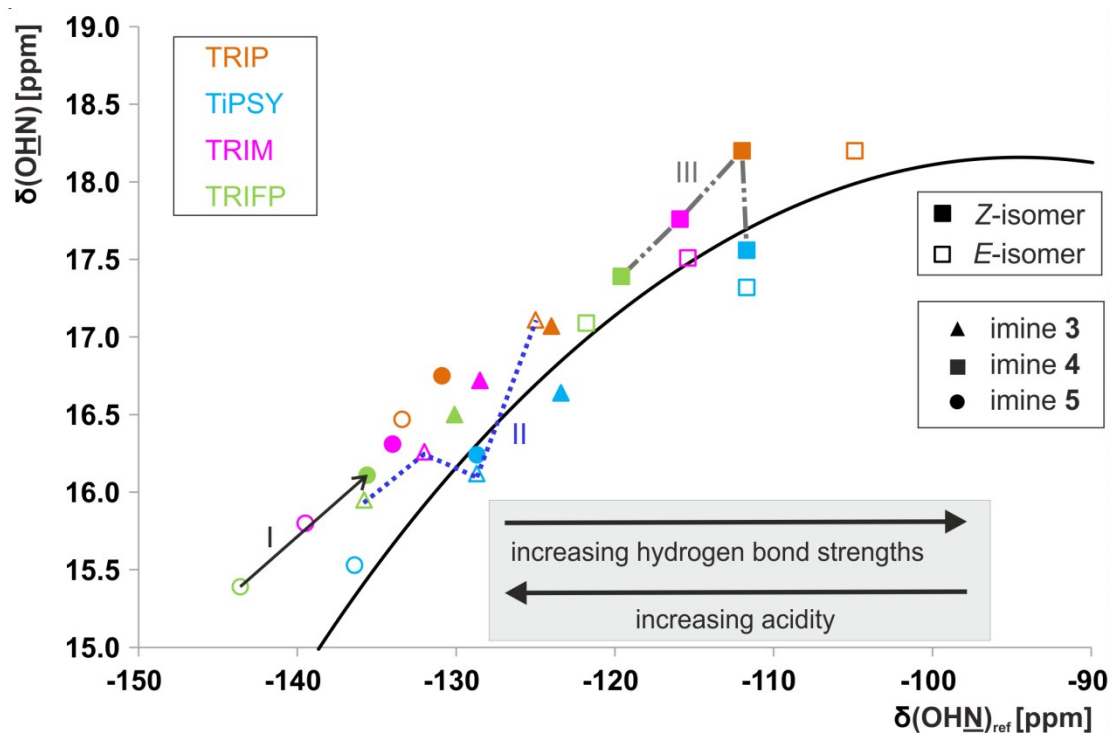

**Figure S 3:** Enlarged section of the Steiner-Limbach curve showing only the binary complexes of CPAs **1a-1d** and imines **3, 4** and **5**. The arrow I visualizes the observed increasing hydrogen bond strengths for the Z-complexes. The comparison of the hydrogen bond strengths of the different CPAs with one given imine is illustrated with the dotted lines II (E-complexes) and III (Z-complexes). These trends are exemplary shown with one imine but can be observed for imines **3-5**.

#### 4 Comparison of the calculated and experimental $^1J_{\text{NH}}$

**Table S 5:** Experimental and calculated  $^1J_{\text{NH}}$  coupling constants for all catalysts with imines 3, 4 and 5 are shown. The experimental values are obtained in  $\text{CD}_2\text{Cl}_2$  at 180K.

| catalyst | imine | $^1J_{\text{NH}}$ [Hz]<br>calc | $^1J_{\text{NH}}$ [Hz]<br>exp |
|----------|-------|--------------------------------|-------------------------------|
| TRIP     | 3E    | -79.87                         | 79.2                          |
|          | 3Z    | -77.24                         | 78.4                          |
|          | 4E    | -77.35                         | 68.7                          |
|          | 4Z    | -75.04                         | 74.8                          |
|          | 5E    | -82.03                         | 82.2                          |
|          | 5Z    | -79.42                         | 81.0                          |
| TRIFP    | 3E    | -81.76                         | 85.1                          |
|          | 3Z    | -82.08                         | 82.7                          |
|          | 4E    | -79.65                         | 80.8                          |
|          | 4Z    | -80.80                         | 80.5                          |
|          | 5E    | -82.86                         | 86.0                          |
|          | 5Z    | -83.56                         | 85.1                          |
| TIPSY    | 3E    | -80.42                         | 81.2                          |
|          | 3Z    | -78.59                         | 78.1                          |
|          | 4E    | -76.41                         | 73.1                          |
|          | 4Z    | -76.00                         | 71.8                          |
|          | 5E    | -81.84                         | 83.7                          |
|          | 5Z    | -80.49                         | 80.0                          |
| TRIM     | 3E    | -81.65                         | 83.9                          |
|          | 3Z    | -78.74                         | 80.9                          |
|          | 4E    | -78.82                         | 77.3                          |
|          | 4Z    | -76.13                         | 76.0                          |
|          | 5E    | -83.63                         | 85.4                          |
|          | 5Z    | -80.25                         | 82.2                          |



## 5 Plots of $^1J_{\text{NH}}$ vs. Hammett $\sigma_{\text{para}}$ constants for *E*- and *Z*-complexes

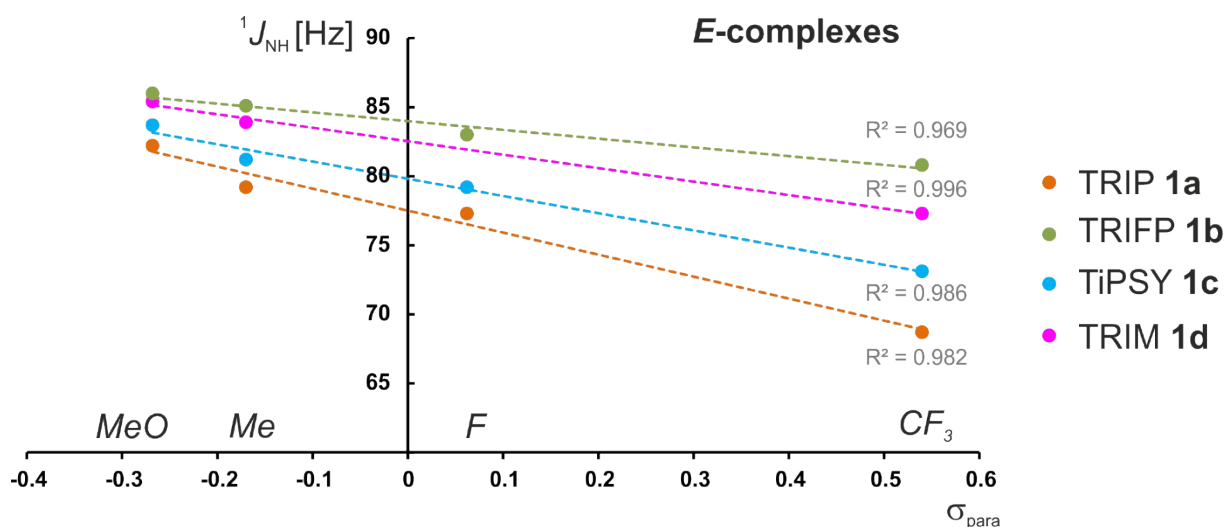

**Figure S 4:** Plot of experimental  $^1J_{\text{HN}}$  values against Hammett  $\sigma_{\text{para}}$  constants for the *E*-complexes of phosphoric acids **1a** – **1d** with imines **3** – **6**. Data are plotted for TiPSY/imine complexes (blue), TRIFP/imine complexes (green), TRIM/imine (pink), and TRIP/imine complexes (orange).

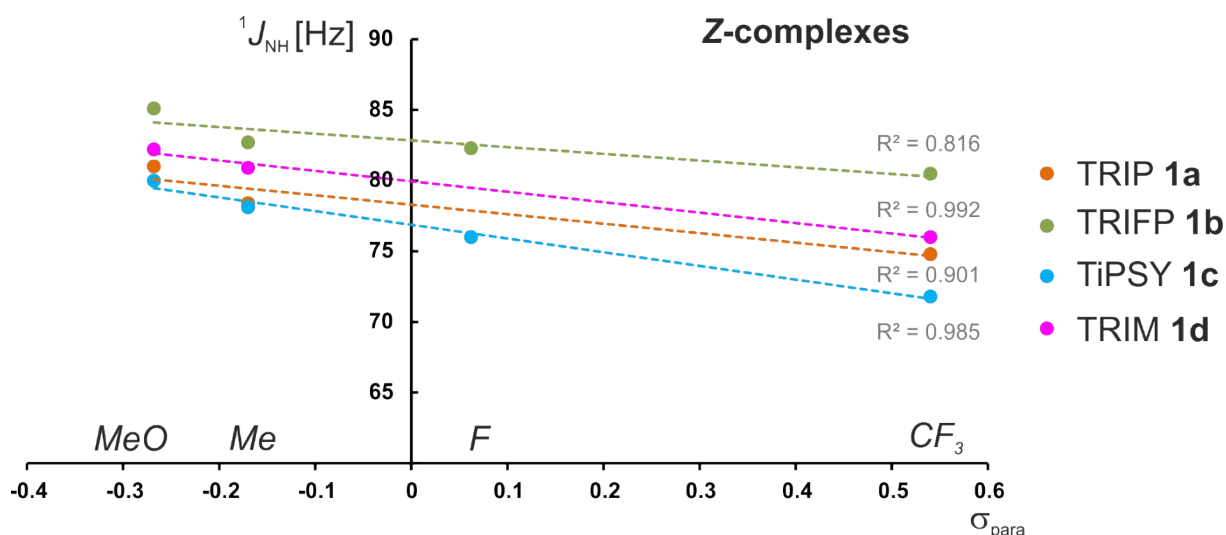

**Figure S 5:** Plot of experimental  $^1J_{\text{HN}}$  values against Hammett  $\sigma_{\text{para}}$  constants for the *Z*-complexes of phosphoric acids **1a** – **1d** with imines **3** – **6**. Data are plotted for TiPSY/imine complexes (blue), TRIFP/imine complexes (green), TRIM/imine (pink), and TRIP/imine complexes (orange).

## 6 Calculation of the external pKa values

An experimental acidity scale with pK<sub>a</sub> values of different Brønsted acid catalysts, including TRIP and TRIFP was published by O'Donoghue in 2011.<sup>16</sup> To our knowledge, there is no such scale including the four catalysts TRIP, TRIFP, TRIM and TiPSY. Therefore, relative pK<sub>a</sub> values in DCM of TRIP, TRIFP, TRIM and TiPSY for an external acidity scale were calculated at DG<sub>180</sub> SCS-MP2/CBS//TPSS-D3/def2-SVP level of theory using equation S11 and S12.

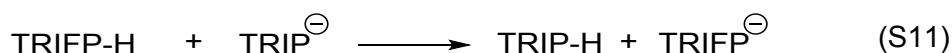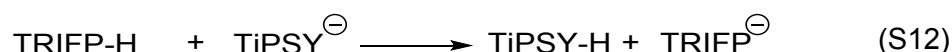

**Table S 6:** Calculated relative (in DCM at 180K) and experimental (in DMSO at 25°C)<sup>16</sup> pK<sub>a</sub> values of the CPAs.

|              | pK <sub>a</sub> <sub>calc</sub> | pK <sub>a</sub> <sub>exp</sub> |
|--------------|---------------------------------|--------------------------------|
| <b>TRIFP</b> | 0                               | 0                              |
| <b>TRIP</b>  | +0.85                           | +1.59                          |
| <b>TiPSY</b> | +6.00                           | n.a.                           |
| <b>TRIM</b>  | +1.57                           | n.a.                           |

The calculations show the lowest pK<sub>a</sub> value for TRIFP followed by TRIP, TRIM and TiPSY. The trend of the external acidity (pK<sub>a</sub><sub>TRIFP</sub> < pK<sub>a</sub><sub>TRIP</sub> < pK<sub>a</sub><sub>TRIM</sub> < pK<sub>a</sub><sub>TiPSY</sub>) predicted in the calculations does not correlate with the internal acidity scale obtained from the Steiner-Limbach analysis (*E*-imines: pK<sub>a</sub><sub>TRIFP</sub> < pK<sub>a</sub><sub>TRIM</sub> < pK<sub>a</sub><sub>TiPSY</sub> < pK<sub>a</sub><sub>TRIP</sub>; *Z*-imines: pK<sub>a</sub><sub>TRIFP</sub> < pK<sub>a</sub><sub>TRIM</sub> < pK<sub>a</sub><sub>TRIP</sub> < pK<sub>a</sub><sub>TiPSY</sub>). This demonstrates that other interactions (dispersion, steric, and electrostatic) significantly contribute in the internal scale.

## 7 Reaction kinetics of the transfer hydrogenation

### 7.1 Procedure for the *in-situ* kinetics

The reactions were performed with a 0.1 molar solution of imine **3** or **5** with 1.4 equivalents of diethyl 1,4-dihydro-2,6-dimethyl-3,5-pyridinedicarboxylate and 1 mol% of catalysts (TRIFP, TRIM and TiPSY) at 313.15 K in 0.5 ml deuterated dichloromethane. Due to solubility reasons, the reaction with TRIM was done in a 0.065 molar solution of **3** with 1.4 equivalents of diethyl 1,4-dihydro-2,6-dimethyl-3,5-pyridinedicarboxylate and 1 mol% of catalysts at 313.15 K in 0.5 ml deuterated dichloromethane. The imines were prepared as described in the experimental section 1.2. Both catalysts and Hantzsch ester were purchased from Sigma Aldrich. To compare the intensities of the spectra, the intensity of the alpha-methyl group of the imine in the first spectrum was used to calibrate the intensities of the alpha-methyl groups of the products. For this reaction in toluene higher yields and enantiomeric excesses are reported. Since structure determination<sup>17</sup> and hydrogen bond analysis were done in dichloromethane, this solvent was also used for the reaction kinetics. Additionally, the signals in dichloromethane are better separated and enable therefore a more exact integration.

The fastest reaction is observed with TRIP, followed by TRIM and TRIFP. Catalyst TiPSY shows only a slow product formation.

### 7.2 Procedure for the *ex-situ* kinetics

A Schlenk tube with an attached septum was dried at 350 °C for 5 min under reduced pressure and then cooled down to room temperature. Imine **5** (73.7 mg, 327 μmol, 1.0 eq.) and Hantzsch Ester (116.0 mg, 457.8 μmol, 1.4 eq.) were weighed into the tube. The tube was evacuated and flushed with argon three times. A standard stock solution of 1,3,5-trimethoxybenzene (54 mM) in anhydrous toluene was prepared and 3 mL of the standard-stock solution were added to the tube under argon flow. The setup was placed into a metal-heating block and preheated to 35 °C. A catalyst stock solution was prepared by dissolving the catalyst (2.9 mM) in anhydrous toluene. To start the reaction, the catalyst stock solution (1.0 mL, 0.009 eq catalyst) was added to the reaction mixture. After 1, 5, 10, 15, 20, 25, 30, 45 and 60 min, samples of the reaction mixture (≈ 0.1 mL) were taken via a septum and quenched by adding to a solution of n-hexane (2.0 mL) and NEt<sub>3</sub> (10 μL, 7.3 μg, 0.072 mmol, 100 eq. based on the catalyst). The mixture was filtered through a syringe filter and analyzed by CSP-HPLC. It was shown that the addition of NEt<sub>3</sub> quenches the reaction and that the standard does not interfere with the reaction.

**HPLC conditions:** CSP-HPLC, CHIRAPACK IC column (4.6mm x 250 mmL, particle size: 5 μm), eluent n-hexane/*i*-propanol 99/1, flowrate 0.9mL/min, column compartment temperature 20°C, λ = 220 nm. retention times: toluene/NEt<sub>3</sub>: τ<sub>1</sub> = 3.73 min; major (*R*)-amine: τ<sub>2</sub> = 10.1 min; minor (*S*)-amine: τ<sub>3</sub> = 11.1 min; 1,3,5-trimethoxybenzene: τ<sub>4</sub> = 15.4 min; imine **5**: τ<sub>5</sub> = 24.9 min; HE-pyridin: τ<sub>6</sub> = 42.8 min;

### 7.3 Kinetics of the transfer hydrogenation with imine **5**

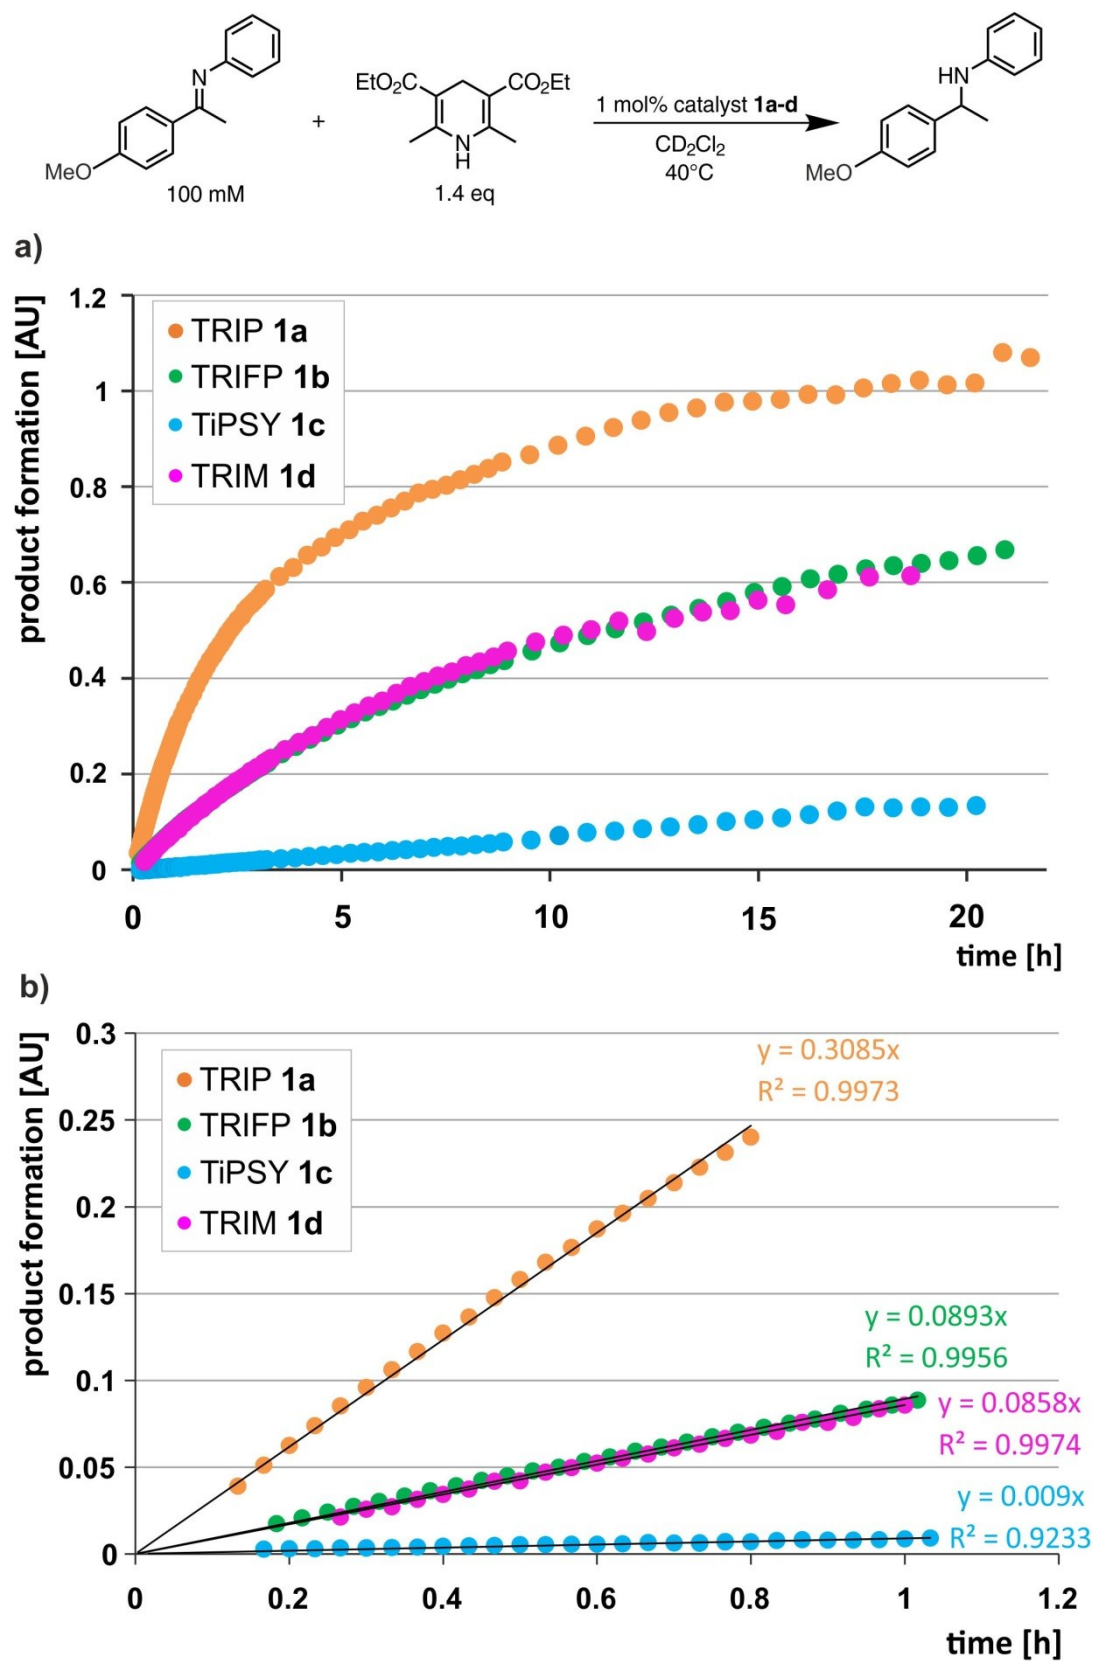

**Figure S 6:** a) The reaction profiles for the symmetric transfer hydrogenation of imine **5** are shown. The kinetics were done in-situ in the NMR spectrometer with 1.4 equivalents of Hantzsch ester and 1 mol% catalyst (TRIP, TRIFP, TiPSY and TRIM) at 40°C in CD<sub>2</sub>Cl<sub>2</sub> b) the linear ranges enable the access to the rate constants.

In general, the reaction with imine **5** is significantly slower than with imine **3**. For all catalysts, the reaction rate of the transfer hydrogenation is reduced to more than half. This is also reflected in the isolated yields after five hours.<sup>18</sup>

Also with imine **5** we identified TRIP as the most reactive catalyst and the reaction catalyzed by TiPSY is by far the slowest. However, the reactivity of TRIM and TRIFP is more or less the same (see Figure S4). These kinetic profiles were recorded in-situ in the NMR-spectrometer. The lower reactivity of TRIM with imine **5** compared to imine **3** may also be due to the low solubility of TRIM in CD<sub>2</sub>Cl<sub>2</sub>. Thus, following the reaction kinetics without stirring has some potential drawbacks. Less amount of catalyst is dissolved in the reaction mixture and the reaction rate is slowed down compared to the other well-soluble catalysts. For this reason, ex-situ kinetics under the normal reaction conditions (in toluene at 35°C) were done. Here we observed the same result as with imine **3**: the reaction with TRIP is the fastest, followed by TRIM and TRIFP. The amount of product for the reaction catalyzed by TiPSY is small and could not be detected by HPLC.

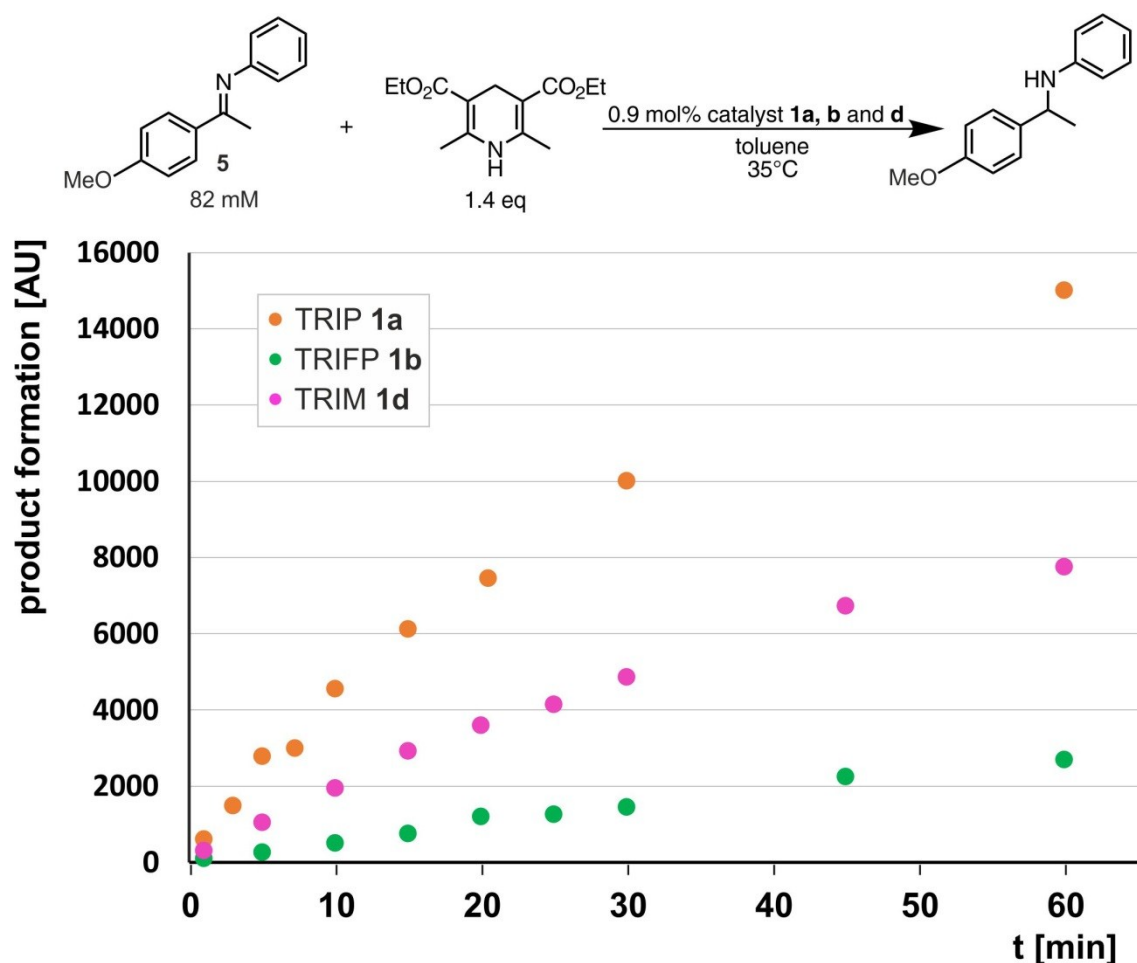

**Figure S 7:** The linear ranges of the reaction profiles for the asymmetric transfer hydrogenation of imine **5** are shown. The kinetics were done ex-situ with 1.4 equivalents of Hantzsch ester and 0.9 mol% catalyst (TRIP, TRIFP, TiPSY and TRM) at 35°C in toluene. The amount of product was analyzed with chiral HPLC.

#### 7.4 Procedure for the in-situ kinetics of a non-isomerizable imine reaction

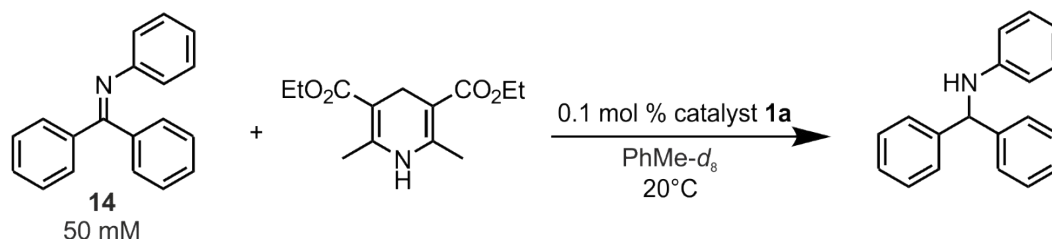

The following kinetic experiments were conducted to show the dependence of the reaction rate on the dissolved Hantzsch ester concentration, without any interference from the isomerization process and the undissolved Hantzsch ester. The loading of the catalyst was set to 0.1 mol % due to the high reactivity of *N*,1,1-triphenylmethanimine (**14**) under the standard conditions (0.9 mol % catalyst,  $35^\circ\text{C}$ ).

**Sample A:** Into an NMR tube charged with *N*,1,1-triphenylmethanimine (9.0 mg,  $35\ \mu\text{mol}$ ) was added a solution of **1a** ( $0.23\ \mu\text{M}$  solution in  $\text{PhMe-}d_8$ , 0.15 mL,  $0.035\ \mu\text{mol}$ , 0.1 mol %). In a separate flask,  $\text{PhMe-}d_8$  (1.3 mL) was added to Hantzsch ester (29.0 mg, 0.11 mmol) and 1,3,5-trimethoxybenzene (2.88 mg, 0.017 mmol). The heterogenous mixture was stirred at rt for 15 min and then an aliquot (0.55 mL) was taken up by a syringe and filtered *via* a syringe filter into the NMR tube containing the imine and the catalyst to achieve the total volume of 0.7 mL. The homogenous sample was shaken thoroughly, inserted into a 600 MHz spectrometer, equilibrated at 293.15 K, and the kinetic profile was recorded.

**Sample B:** To achieve a different concentration of the dissolved Hantzsch ester, the imine/**1a** mixture was prepared as previously, and diluted by additional solvent (0.3 mL). Hantzsch ester mixture (0.25 mL) was then filtered into the NMR tube. The kinetic profile was recorded as previously stated. In contrast, directly diluting the Hantzsch ester mixture led to the same final Hantzsch ester concentration, as more ester readily dissolved.

Sample A: imine/standard/(Hantzsch ester+Hantzsch pyridine) ratio of 5.8:1:0.5.

Sample B: imine/standard/(Hantzsch ester+Hantzsch pyridine) ratio of 12.2:1:0.5.

Product *N*-benzhydrylaniline:  $^1\text{H}$  NMR (600 MHz,  $\text{PhMe-}d_8$ , 293.15 K):  $\delta$  7.22 – 7.18 (m, 4H), 7.13 – 7.09 (m, 4H), 7.07 – 7.03 (m, 4H), 6.70 (tt,  $J = 7.4, 1.0$  Hz, 1H), 6.42 – 6.38 (m, 2H), 5.38 (d,  $J = 4.1$  Hz, 1H), 3.87 (br d,  $J = 4.0$  Hz, 1H).

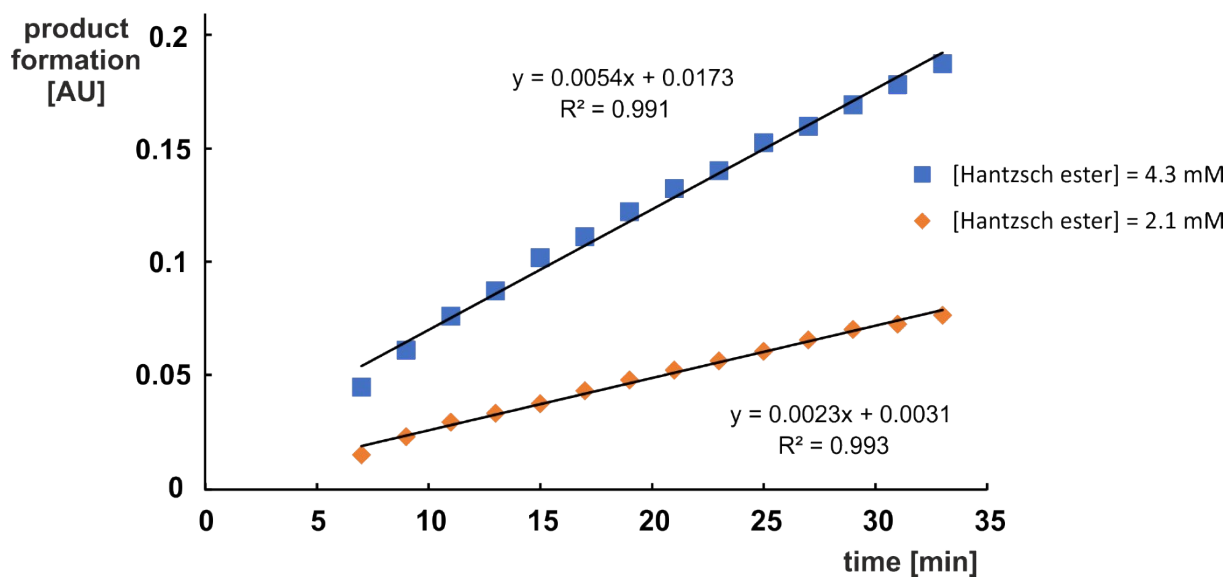

**Figure S 8:** The linear range of the reaction profiles for the transfer hydrogenation of non-isomerizable imine **14** are shown. The kinetics were done in-situ with dissolved Hantzsch ester and 0.1 mol% catalyst (TRIP) at 20°C in PhMe- $d_8$ . The amount of product was analyzed by integration of the  $^1\text{H}$  spectra.

The ratio of the Hantzsch ester concentrations is 2.10:1 and the ratio of the initial relative rates is 2.35:1 in these experiments, suggesting a first-order reaction with respect to the Hantzsch ester.

## 8 Amount of free imine in the $^1\text{H}$ spectra

The amount of free imine is experimentally accessible by the integration of the  $^1\text{H}$ -signals obtaining from the OMe-groups of imine **5** in 1:1 sample of the catalyst and imine **5** in  $\text{CD}_2\text{Cl}_2$  at 180K. In this region three different signals (free imine, hydrogen bonded *E*- and *Z*-imine) are visible. For referencing the signal of the hydrogen-bonded *E*-imine was set to 1 in all cases. The determination of the amount of free imine for other imines is unreliable because of signal overlapping.

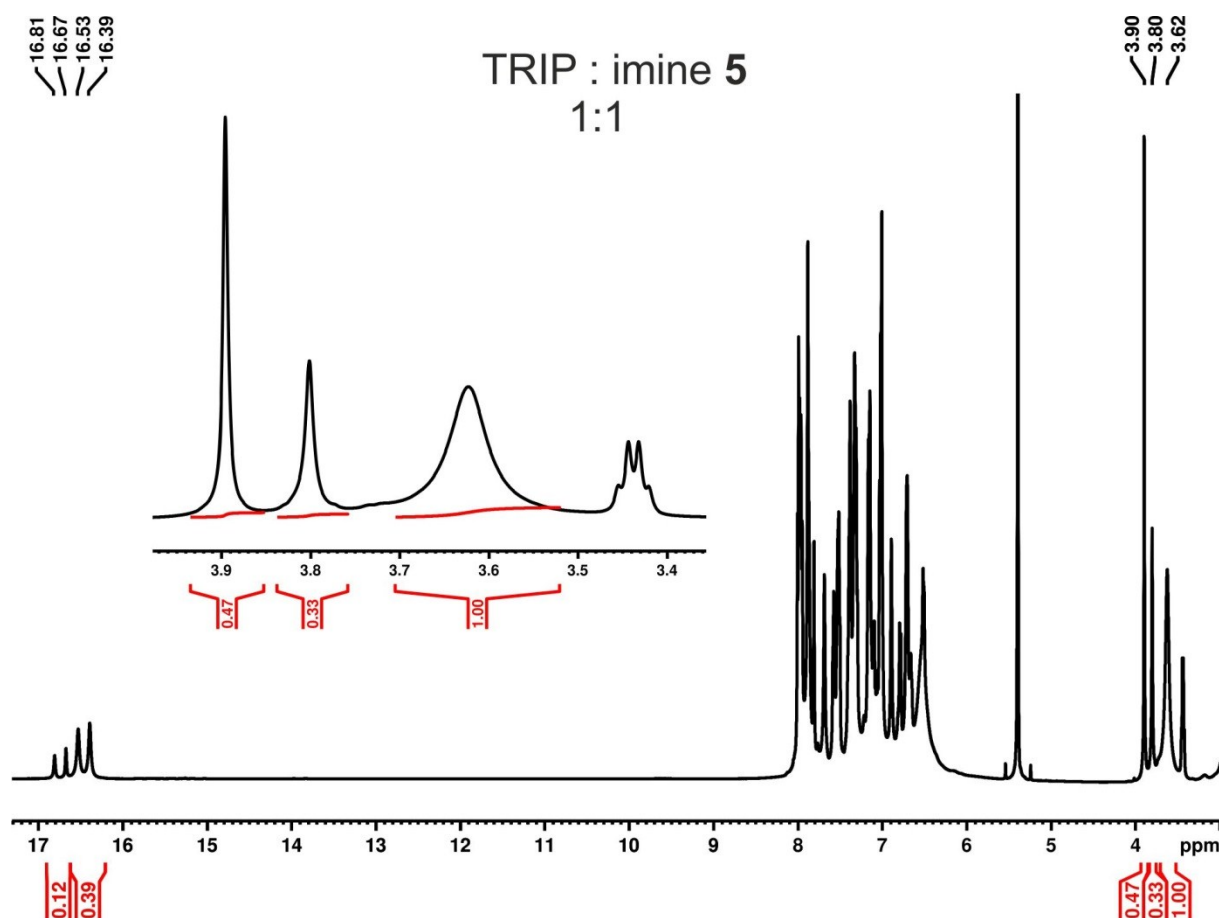

**Figure S 9:**  $^1\text{H}$ -spectra of a 1:1 sample of TRIP and imine **5** in  $\text{CD}_2\text{Cl}_2$  at 180K. For the determination of the amount of free imine the signals of the OMe-groups (free imine: 3.90 ppm, *Z*-imine: 3.80 ppm and *E*-imine: 3.62 ppm) were used. Furthermore, the signals of the hydrogen-bonded protons (*Z*-imine: 16.75 ppm and *E*-imine: 16.47 ppm) are shown.



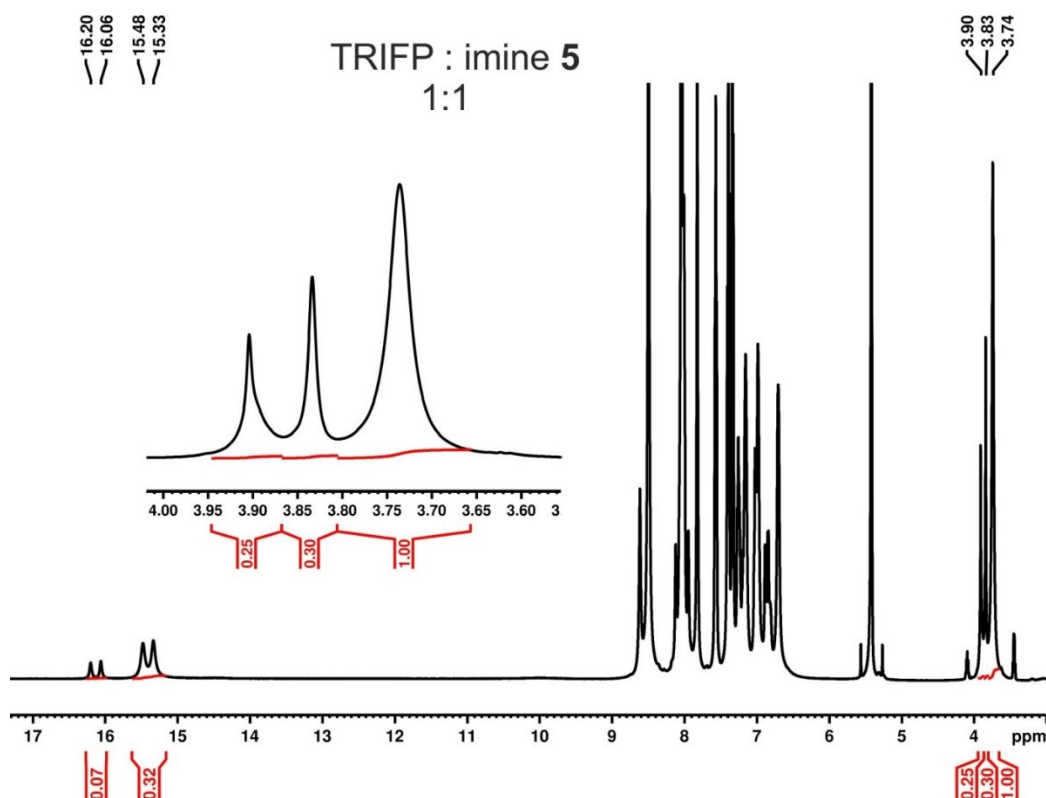

**Figure S 10:**  $^1\text{H}$ -spectra of a 1:1 sample of TRIFP and imine **5** in  $\text{CD}_2\text{Cl}_2$  at 180K. For the determination of the amount of free imine the signals of the OMe-groups (free imine: 3.90 ppm, *Z*-imine: 3.83 ppm and *E*-imine: 3.74 ppm) were used. Furthermore, the signals of the hydrogen-bonded protons (*Z*-imine: 16.11 ppm and *E*-imine: 15.39 ppm) are shown.

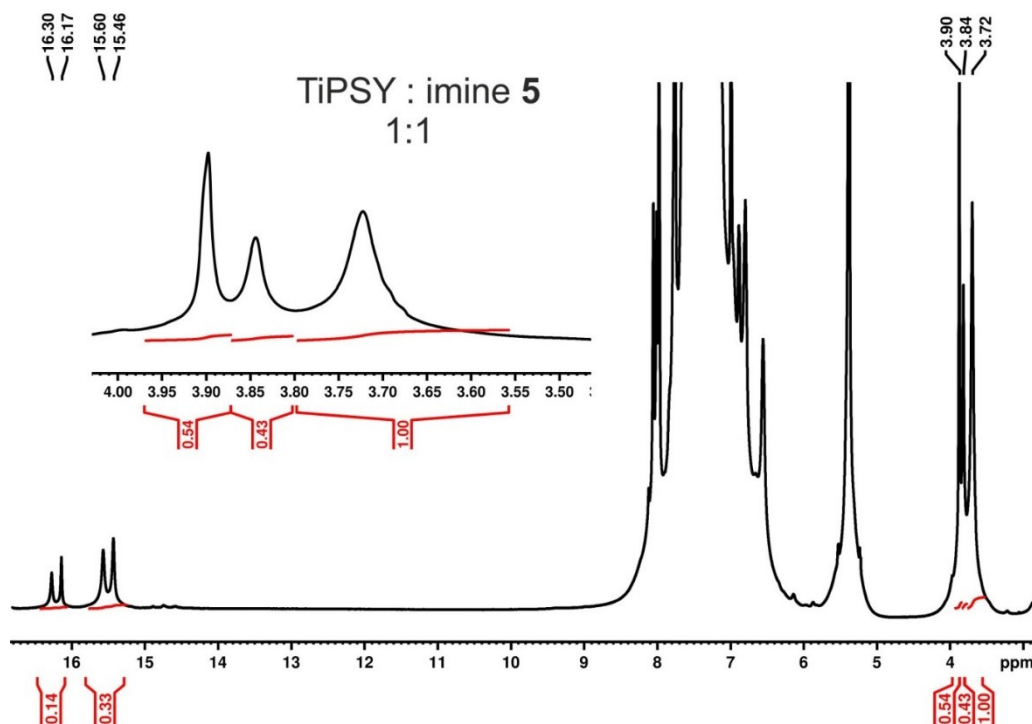

**Figure S 11:**  $^1\text{H}$ -spectra of a 1:1 sample of TiPSY and imine **5** in  $\text{CD}_2\text{Cl}_2$  at 180K. For the determination of the amount of free imine the signals of the OMe-groups (free imine: 3.90 ppm, *Z*-imine: 3.84 ppm and *E*-imine: 3.72 ppm) were used. Furthermore, the signals of the hydrogen-bonded protons (*Z*-imine: 16.24 ppm and *E*-imine: 15.53 ppm) are shown.

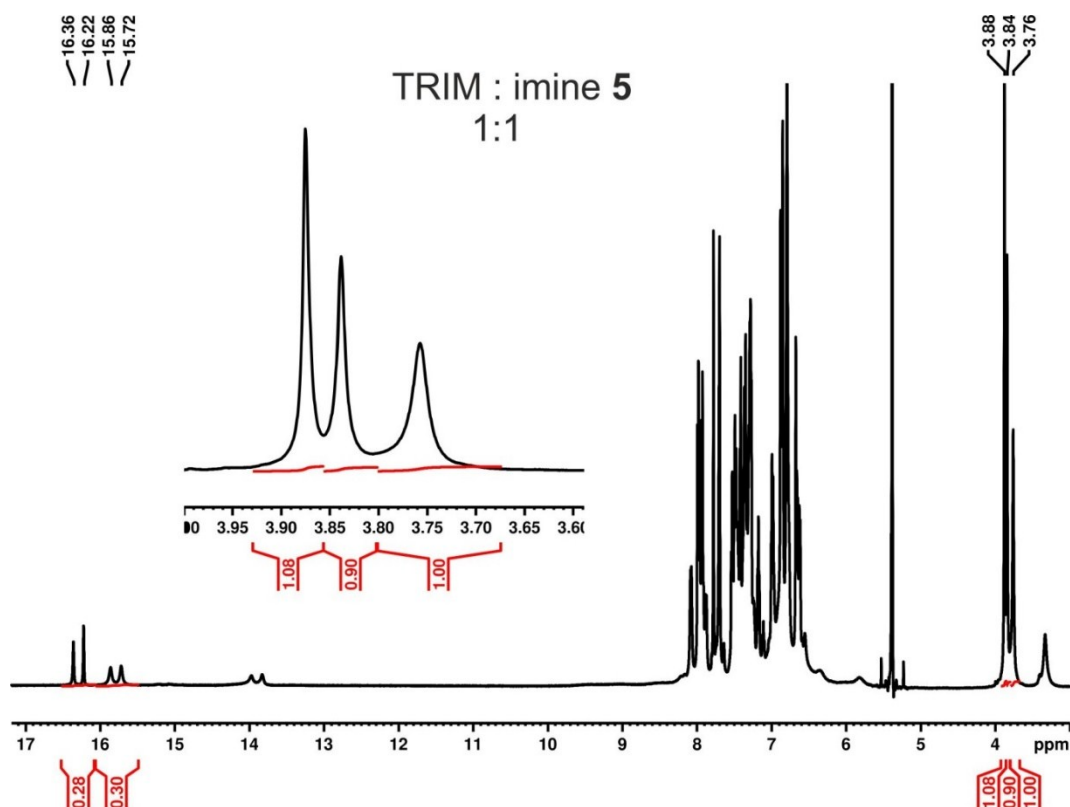

**Figure S 12:**  $^1\text{H}$ -spectra of a 1:1 sample of TRIM and imine **5** in  $\text{CD}_2\text{Cl}_2$  at 180K. For the determination of the amount of free imine the signals of the OMe-groups (free imine: 3.88 ppm, Z-imine: 3.84 ppm and E-imine: 3.76 ppm) were used. Furthermore, the signals of the hydrogen-bonded protons (Z-imine: 16.31 ppm and E-imine: 15.80 ppm) are shown.

For all cases, the obtained integrals (of free imine as well as hydrogen bonded E- and Z-imine) and the amount of free imine **5** are summarized in Table S9. Binary complex association constants were calculated from the equilibrium as  $K_a = [\text{binary complex}] / ([\text{free imine}] [\text{free CPA}]) = c_0(1-\alpha)/(c_0\alpha)^2$ , with  $c_0 = 0.050$  M and  $\alpha$  is the % amount of the free imine.

**Table S 7:** The integrals of the  $^1\text{H}$ -signals in  $\text{CD}_2\text{Cl}_2$  at 180 K are summarized. The OMe signals for the free imine as well as the hydrogen bonded E- and Z-imines were integrated and the the amount of free imine was calculated.

| catalyst | imine    | integral (E) | integral (Z) | integral (free) | free [%] | $K_a$ [ $\text{M}^{-1}$ ] |
|----------|----------|--------------|--------------|-----------------|----------|---------------------------|
| TRIP     | <b>5</b> | 1            | 0.31         | 0.47            | 26       | 219                       |
| TRIFP    | <b>5</b> | 1            | 0.30         | 0.25            | 16       | 656                       |
| TiPSY    | <b>5</b> | 1            | 0.43         | 0.54            | 27       | 200                       |
| TRIM     | <b>5</b> | 1            | 0.90         | 1.08            | 36       | 106                       |

## 9 Formation of the binary complex

TRIM/5 180 K  
blue: t = 7 min  
red: t = 3 d

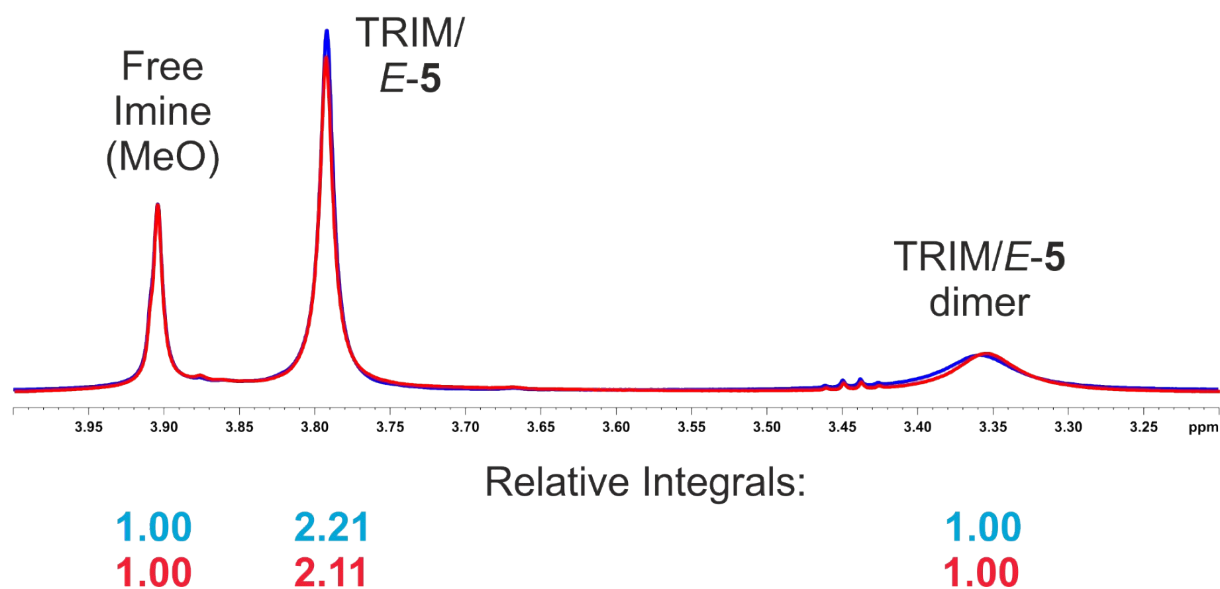

**Figure S13:** Fast formation of the binary complex. The blue spectrum was recorded 7 min after solvation of TRIM and imine **5** at  $-80^{\circ}\text{C}$ , the red spectrum 3 days afterward (the sample was continuously kept at  $-80^{\circ}\text{C}$ ). The relative integrals show, that no further complexation occurs after 7 min.

## 10 Reactivity at 180 K and 220 K of TRIM/imine complex with Hantzsch Ester

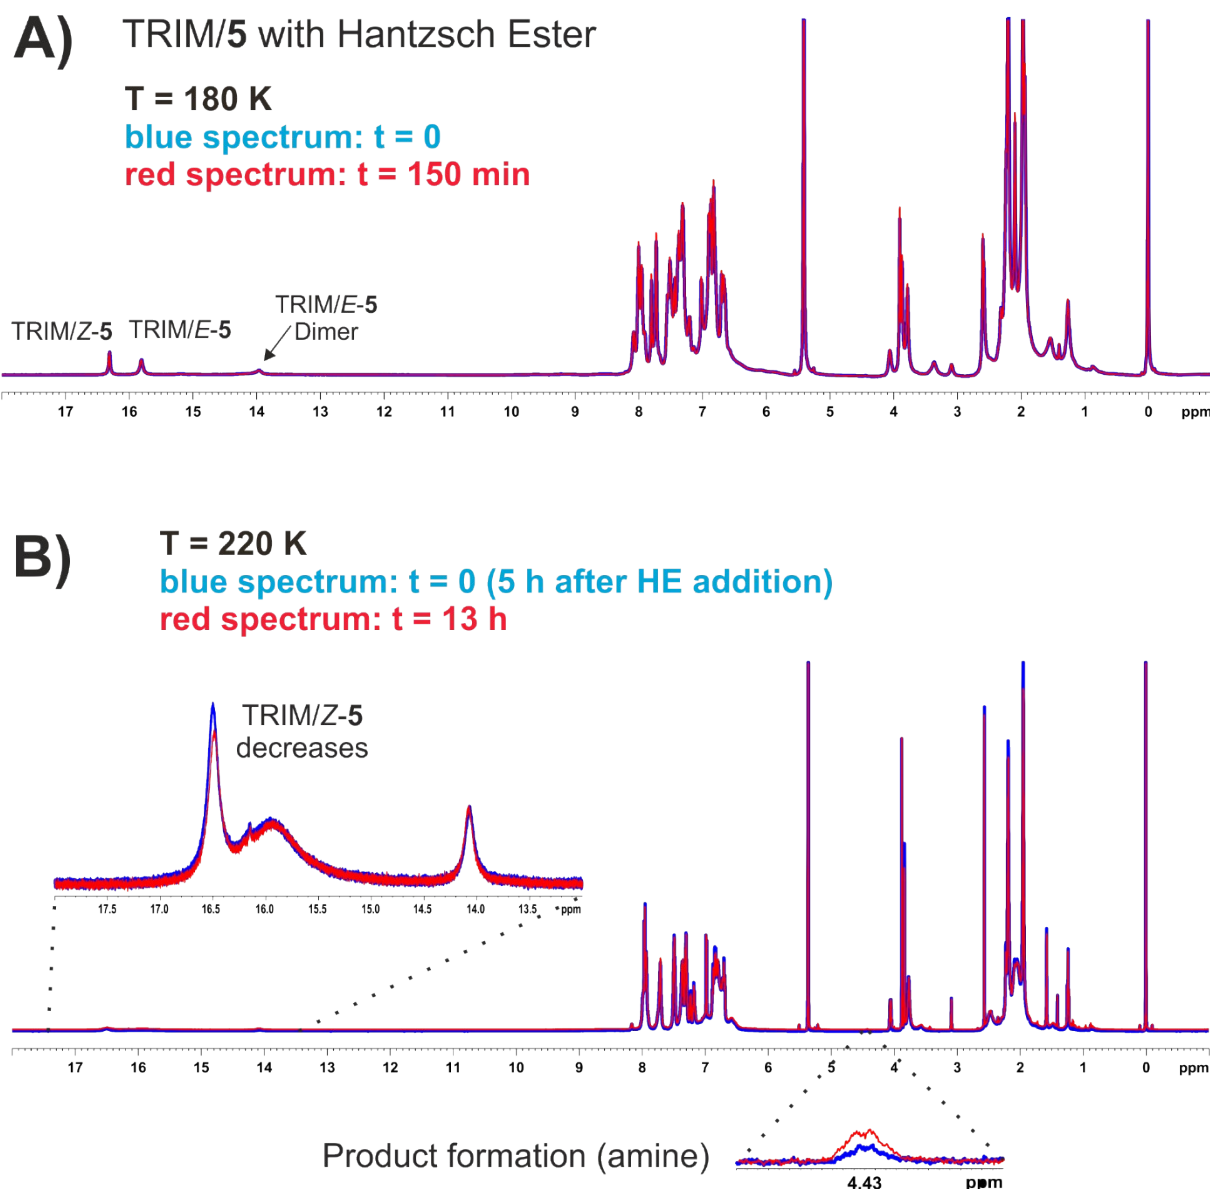

**Figure S14:** A 1:1 sample of TRIM and imine **5** was prepared (50 mM) at room temperature. The sample was cooled to 180 K and Hantzsch Ester (1.4 eq.) was added. **A)** Shows two overlapped spectra of the sample (blue: directly after HE addition, red: 150 min after the blue spectrum). Both spectra are identical despite the presence of dissolved Hantzsch Ester and binary *E*- and *Z*-complex, showing that no reaction occurs at 180 K. **B)** Overlap of two spectra of the sample ( $\Delta t = 13$  h) at 220 K. The blue spectrum ( $t=0$ ) was recorded 5 h after HE addition, the red spectrum 13 h afterwards. The product formation could be observed, as well as a signal decrease of TRIM/Z-5, showing that a slow reaction occurs at 220 K. In all recorded spectra, no additional signals appeared over time (despite the formed product), indicating that no build up of the ternary complex proceeds.

## 11 Determination of the *E*-to-*Z*-isomerization rates

For the determination of the *E*-to-*Z*-isomerization rates  $k_{E \rightarrow Z}$ , the  $\Delta G_{\text{ges}}$  has to be determined first.  $\Delta G_{\text{ges}}$  arises from equation S13. The definition of  $\Delta G_1$  and  $\Delta G_2$ , which are used in this work, is depicted in figure S6.

$$\Delta G_1 + \Delta G_2 = \Delta G_{\text{ges}} \quad (\text{S13})$$

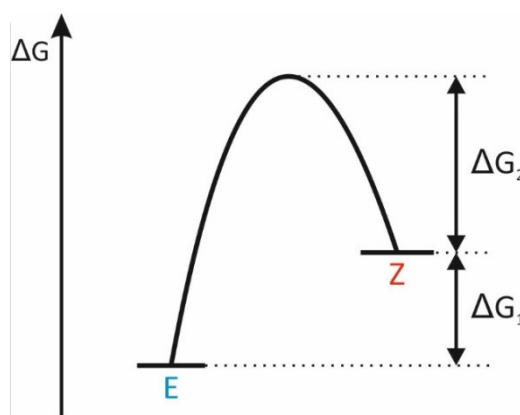

**Figure S 15:** The *E*-imine is thermodynamically more favored than the *Z*-imine. Additionally, the definition of the  $\Delta G_1$  and  $\Delta G_2$  used in this work is shown.

The only experimental way to determine the *Z*-to-*E*-isomerization rate is by increasing the amount of thermodynamically unfavored *Z*-imine by illumination with 365 nm (in-situ, for experimental set-up, see reference<sup>22</sup>). Afterwards the back-isomerization to the more stable *E*-imine was observed with NMR. Finally, the decay-curves of the *Z*-imine can be fitted mathematically (with equation S14). The *Z*-to-*E*-isomerization rate is defined as  $k_{Z \rightarrow E} = 1/t_1$ . Then  $\Delta G_2$  can be calculated from equation S15. The obtained values are summarized in Table S7. The decay curves are shown in chapter 10.2.

$$y = A_1 * e^{\frac{-x}{t_1}} + y_0 \quad (\text{S14})$$

$$k_{Z \rightarrow E} = \frac{(k_B * T)}{h} * e^{-\frac{\Delta G_2}{RT}} \quad (\text{S15})$$

**Table S 8:** The experimentally observed *Z*-to-*E*-isomerization rates  $k_{Z \rightarrow E}$ , as well as the related  $\Delta G_2$  at different temperatures, are shown.

| catalyst | imine | temperature [K] | $k_{Z \rightarrow E}$ [ $*10^{-3}$ 1/s] | $\Delta G_2$ [kJ] |
|----------|-------|-----------------|-----------------------------------------|-------------------|
| TRIFP    | 5     | 230             | 2.52                                    | 67.28             |
| TIPSY    | 5     | 230             | 1.19                                    | 68.71             |

|      |   |     |      |       |
|------|---|-----|------|-------|
| TRIP | 5 | 230 | 9.04 | 64.83 |
|------|---|-----|------|-------|

For the determination of the *E*-to-*Z*-isomerization rate constants, the amount of *E*- and *Z*-imine in the binary complex was determined. Here it is very important that the spectra were recorded in the thermodynamic equilibrium. After some mathematical transformations of the Boltzmann distribution (equation S16),  $\Delta G_1$  can be observed from equation S17. Here,  $N_0$  represents the integral of the *E*-imine, which is set to 1 in all cases.  $N_i$  is the integral of the *Z*-imine.

$$\frac{N_i}{N_0} = e^{\frac{-\Delta G_1}{k_B T}} \quad (\text{S16})$$

$$\Delta G_1 = -RT * \ln\left(\frac{N_i}{N_0}\right) \quad (\text{S17})$$

After the calculation of  $\Delta G_{\text{ges}}$  (equation S13) the *E*-to-*Z*-isomerization rate  $k_{E \rightarrow Z}$  can be determined with equation S18. The obtained values for  $\Delta G_1$ ,  $\Delta G_{\text{ges}}$  and  $k_{E \rightarrow Z}$  are summarized in table S8 for different catalysts at 230 K.

$$k_{E \rightarrow Z} = \frac{(k_B * T)}{h} * e^{-\frac{\Delta G_{\text{ges}}}{RT}} \quad (\text{S18})$$

**Table S 9:** The experimentally observed amounts of *Z*-imine ( $N_i$ ) and *E*-imine ( $N_0$ ) as well as the calculated  $\Delta G_2$ ,  $\Delta G_{\text{ges}}$  and the *Z*-to-*E*-isomerization rates  $k_{Z \rightarrow E}$  at 230 K in  $\text{CD}_2\text{Cl}_2$  are shown.

| catalyst | imine | T [K] | $N_i$  | $N_0$ | $\Delta G_1$ [kJ] | $\Delta G_{\text{ges}}$ [kJ] | $k_{E \rightarrow Z}$ [ $*10^{-3}$ 1/s] |
|----------|-------|-------|--------|-------|-------------------|------------------------------|-----------------------------------------|
| TRIFP    | 5     | 230   | 0.1768 | 1     | 3.31              | 70.59                        | 0.45                                    |
| TIPSY    | 5     | 230   | 0.4786 | 1     | 1.41              | 70.11                        | 0.57                                    |
| TRIP     | 5     | 230   | 0.1500 | 1     | 3.63              | 68.46                        | 1.36                                    |

### 11.1 Sample preparation

The catalyst (30  $\mu\text{mol}$ ) was directly weighed into a 5 mm NMR tube and dried for 20 min at 120°C under reduced pressure. Under argon atmosphere the Ketimine (30  $\mu\text{mol}$ ) was added and dissolved in dry  $\text{CD}_2\text{Cl}_2$  (0.5 ml).

Even after careful sample preparation, partial hydrolysis of the imine could not be completely prevented. Therefore the imine/CPA-ratios are slightly different from 1:1.

## 11.2 Decay curves

The amount of *Z*-imine is increased by illumination with 365 nm with a glass fiber inside the NMR.<sup>18,22</sup> For the imine **5** the photostationary state in CD<sub>2</sub>Cl<sub>2</sub> at 190 K was reached after 3 h (constant *E/Z*-ratio of 1/1.7). Then the thermal *Z*-to-*E*-back-isomerization is observed inside the NMR-spectrometer at 230K. 230K were chosen because here the *Z*-imine is thermally back converted to the *E*-isomer in a reasonable amount of time. Over 250 K the back-isomerization is so fast that it could not be detected. All the measured decay curves as well as the associated fit-equations (see also equation S14) are shown in figure S7 to S9.

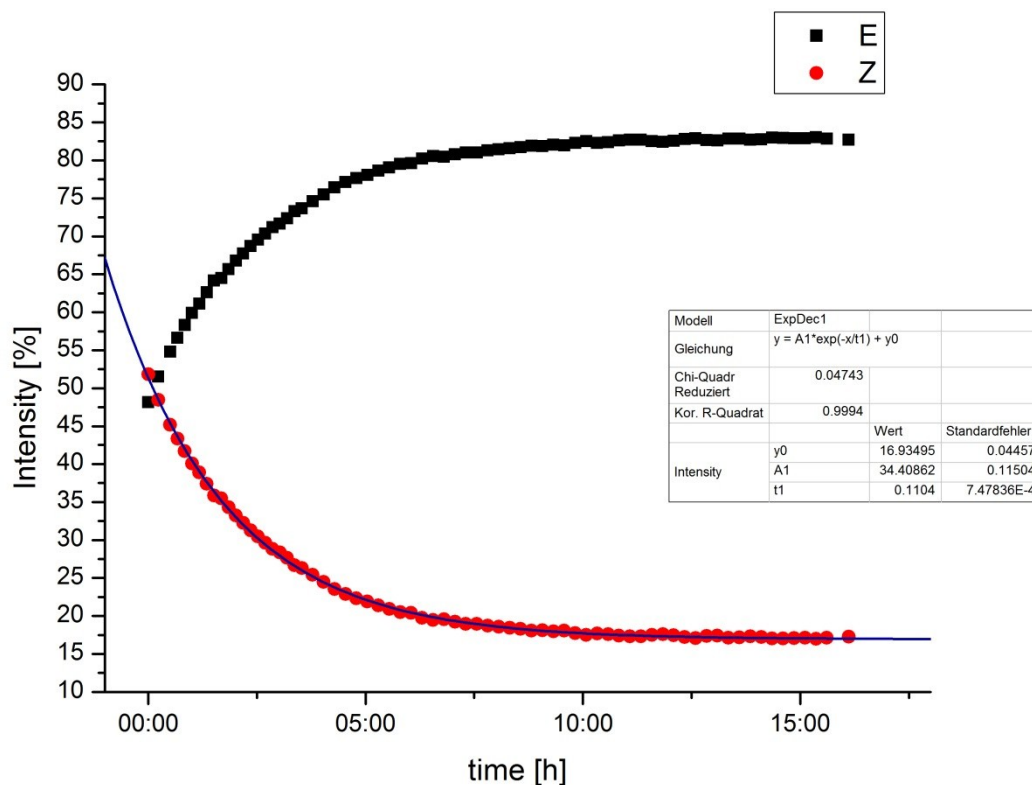

**Figure S 16:** The thermal back-isomerization of the *Z*-imine (red) in the binary TRIFP/**5**-complex at 230K in CD<sub>2</sub>Cl<sub>2</sub> is shown. While the amount of *Z*-imine decreases, the amount of the thermodynamically more stable *E*-imine (black) is increased. The fit delivers the following values for the constants:  $y_0 = 16.94 \pm 0.05$ ,  $A_1 = 34.41 \pm 0.12$  and  $t_1 = 0.1104 \pm 0.0008$ .

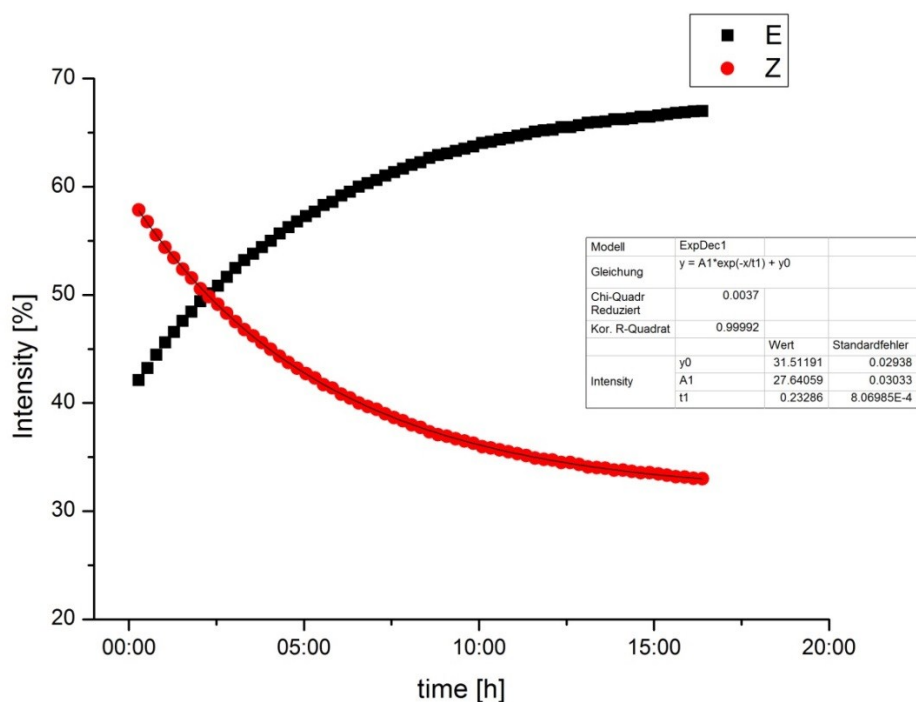

**Figure S 17:** The thermal back-isomerization of the Z-imine (red) in the binary TiPSY/5-complex at 230K in  $CD_2Cl_2$  is shown. While the amount of Z-imine decreases, the amount of the thermodynamically more stable E-imine (black) is increased. The fit delivers the following values for the constants:  $y_0 = 31.51 \pm 0.03$ ,  $A_1 = 27.64 \pm 0.03$  and  $t_1 = 0.2329 \pm 0.0008$ .

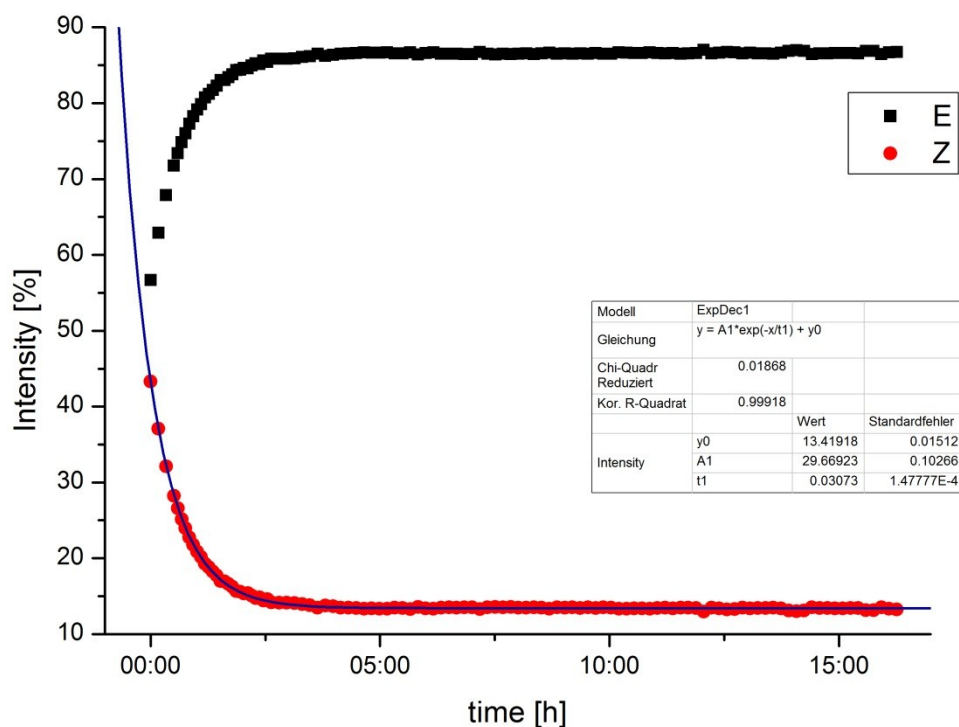

**Figure S 18:** The thermal back-isomerization of the Z-imine (red) in the binary TRIP/5-complex at 230K in  $CD_2Cl_2$  is shown. While the amount of Z-imine decreases, the amount of the thermodynamically more stable E-imine (black) is increased. The fit delivers the following values for the constants:  $y_0 = 13.41 \pm 0.02$ ,  $A_1 = 29.67 \pm 0.10$  and  $t_1 = 0.0307 \pm 0.0002$ .



## 12 Investigations on the ternary complex of TRIP, imine **5** and Hantzsch ester

For the investigations of the ternary complex in this chapter, a TRIP/imine **5**/Hantzsch ester-ratio of 1:3:3 was used. This ratio was chosen to shift the equilibrium between the Hantzsch ester in its free form and the Hantzsch ester in the ternary complex to the side of the ternary complex.

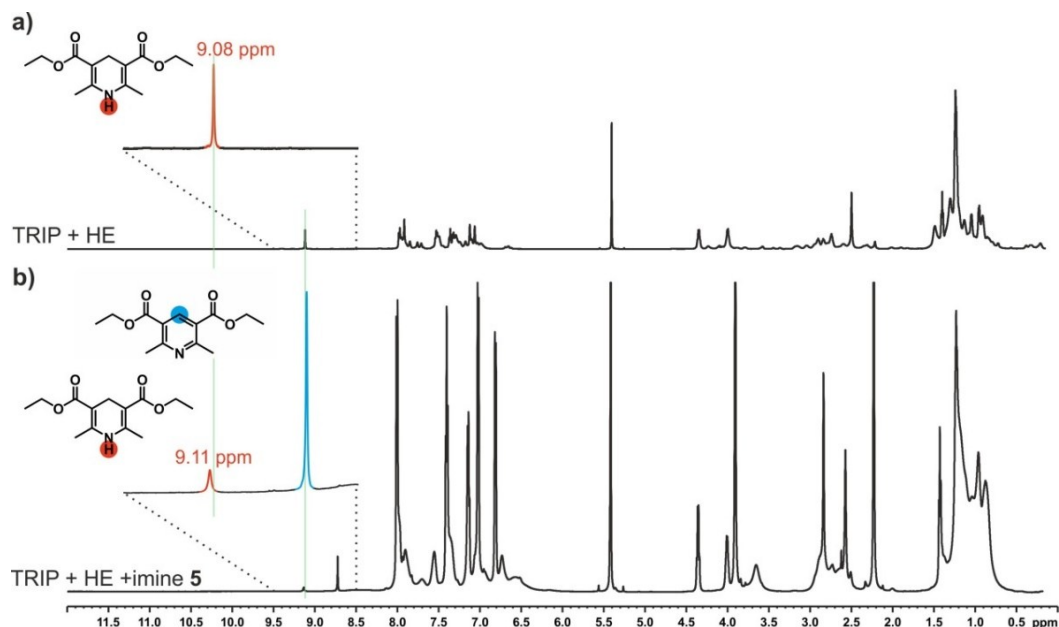

**Figure S 19:** The spectra of a) TRIP and Hantzsch ester (HE) and b) Hantzsch ester with TRIP and imine **5** in CD<sub>2</sub>Cl<sub>2</sub> at 200K are shown. The very small shift ( $\Delta\delta = 0.03$  ppm) of the NH-proton of the Hantzsch ester (red circle) in both spectra is a hint that only a small amount of ternary complex was formed. Both spectra are referenced to TMS.

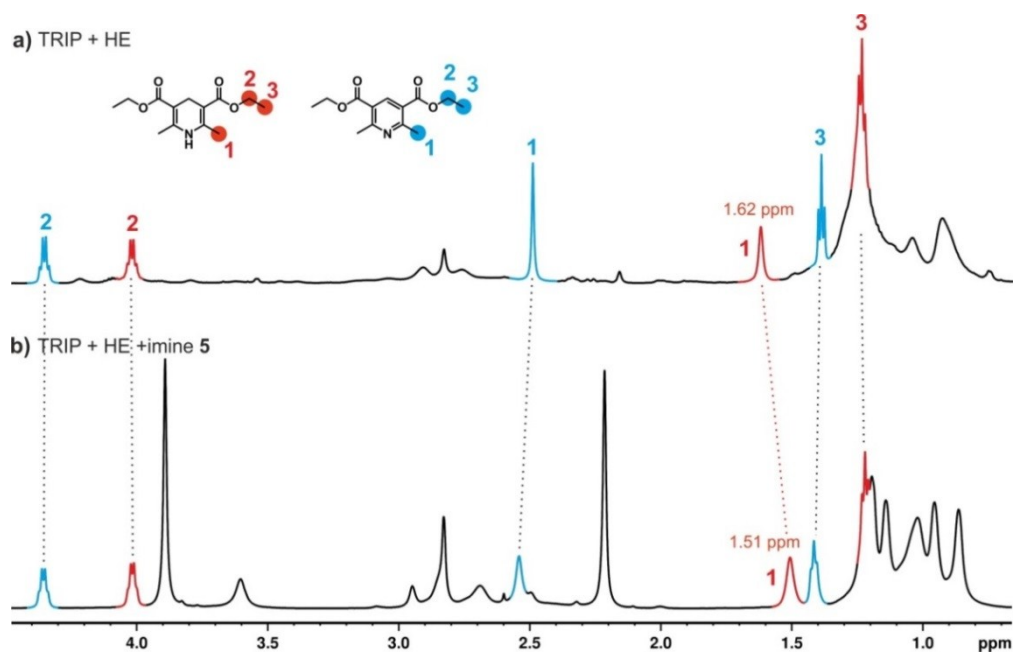

**Figure S 20:** The spectra of a) TRIP and Hantzsch ester (HE) and b) Hantzsch ester with TRIP and imine **5** in CD<sub>2</sub>Cl<sub>2</sub> at 200K are shown. For the ortho-methyl group of the Hantzsch ester (red 1) a small highfield shift ( $\Delta\delta = 0.51$  ppm) was observed. This may be due to the shielding by aromatic protons of the catalyst backbone. For the other aliphatic signals, almost no shift is observed. Both spectra are referenced to TMS.

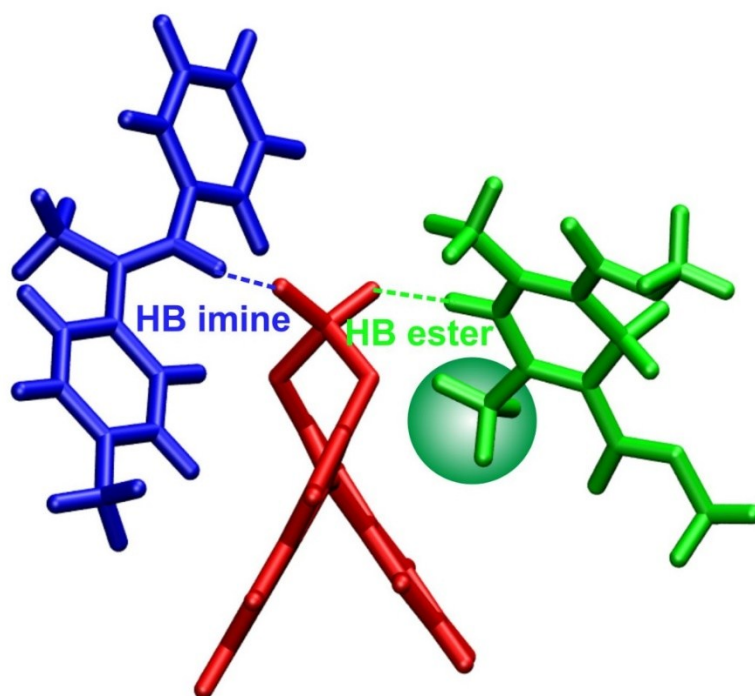

**Figure S 21:** Structural analysis of the computed ternary complex (imine **5**: blue, TRIP: red, Hantzsch ester: green) revealed spatial proximity of the *ortho*-methyl group (green circle) to the BINOL backbone of the TRIP which explains the high-field shift due to shielding by the aromatic ring. As an example, the *type I E*-imine **5** was chosen.

a) TRIP + imine **5**

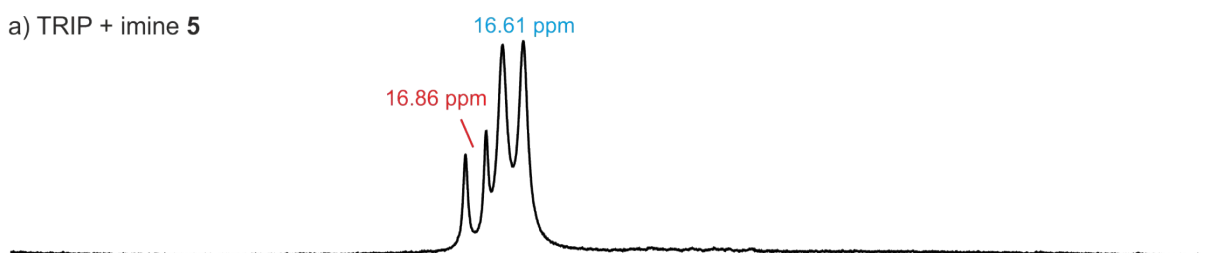

b) TRIP + HE + imine **5**

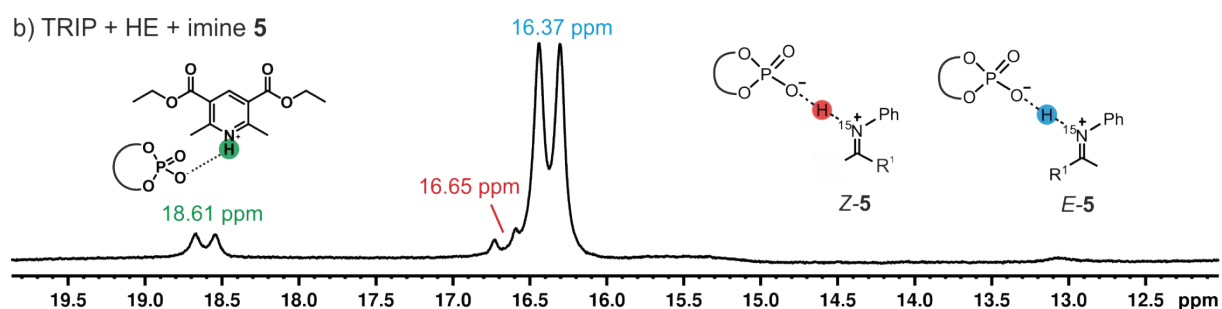

**Figure S 22:** a) The hydrogen bond region of the  $^1\text{H}$ -spectra of imine **5** and TRIP (1:1) are (*E*-complex: 16.61 ppm and *Z*-complex: 16.86 ppm) b) After the addition of Hantzsch ester to imine **5** and TRIP both signals are slightly shifted (*E*-complex: 16.37 ppm and *Z*-complex: 16.65 ppm). Both spectra were recorded at 200 K in  $\text{CD}_2\text{Cl}_2$ .

### 13 Investigations on the ternary complex of TRIM, imine **5** and Hantzsch ester

In the investigations of the ternary complex in this chapter a TRIM/imine **5**/Hantzsch ester-ratio of 1:1:1.4 was used.

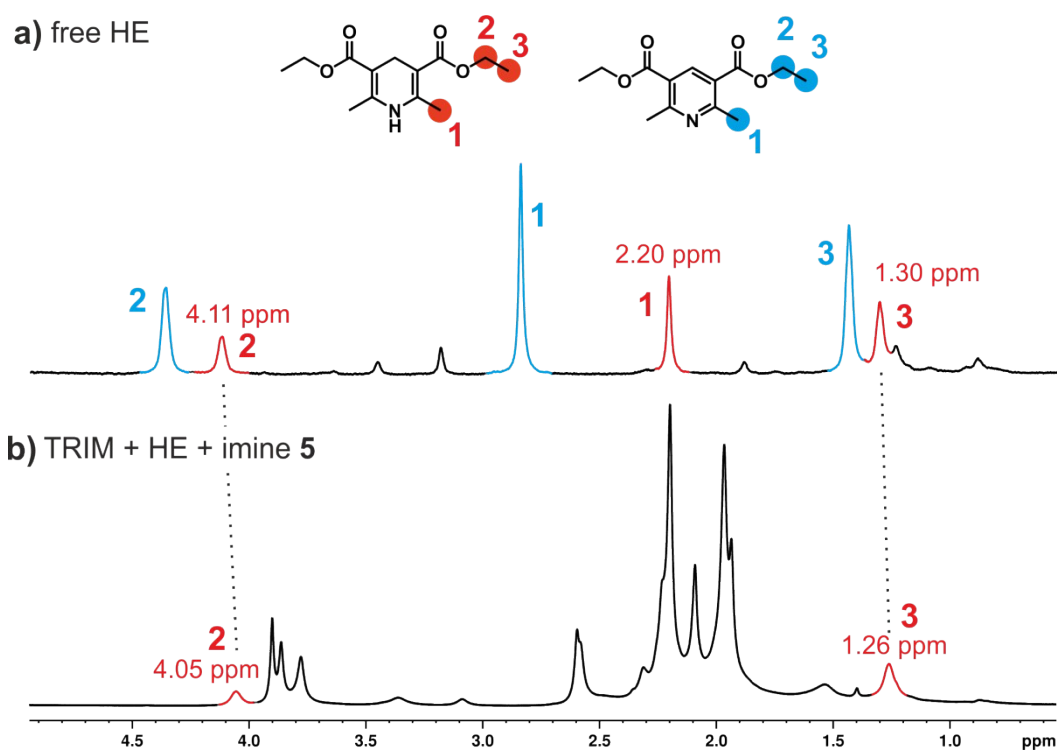

**Figure S 23:** The spectra of a) Hantzsch ester (HE) and b) Hantzsch ester with TRIP and imine **5** in  $\text{CD}_2\text{Cl}_2$  at 180K are shown. For the signals 2 and 3 of the Hantzsch ester (red), small shift (for 2:  $\Delta\delta = 0.06$  ppm and for 3:  $\Delta\delta = 0.04$  ppm) could be observed. The assignment of proton 1 in spectrum b) is not unambiguous.

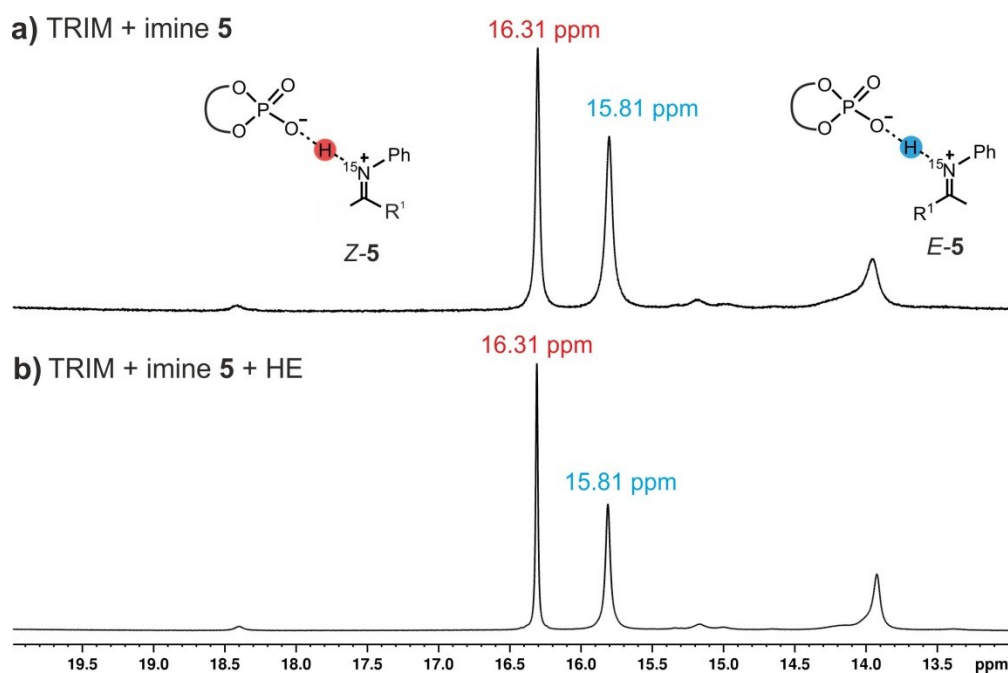

**Figure S 24:** a) In the spectra of imine **5** and TRIM the hydrogen-bonded protons of the E- and Z-complex (E-complex: 15.81 ppm and Z-complex: 16.31 ppm) are well separated. b) By adding Hantzsch ester to imine **5** and TRIM no shift of the signals is detectable (E-complex: 15.81 ppm and Z-complex: 16.31 ppm). Both spectra were recorded at 180 K in  $\text{CD}_2\text{Cl}_2$  and referenced to TMS.

## 14 Barrier of the hydride transfer

According to the previous calculations, the barrier of hydride transfer equals 53 to 60 kJ/mol.<sup>18</sup> Thus, under the assumption that the formation of the ternary complex is not rate limiting or thermodynamically unfavorable, the measured isomerization rate (barrier approx. 65 to 70 kJ/mol), is several order of magnitude slower than the hydride transfer step. The NMR spectra showed a fast exchange between the ternary complex and the binary complex. Hence, kinetically the formation of the ternary complex is not demanding; however, the minor shift of the Hantzsch ester acidic proton-signal suggests that the binding constant of Hantzsch ester is very low.

## 15 Solubility of Hantzsch ester in toluene

Hantzsch ester (14.50 mg, 0.057 mmol) was weighed into an NMR tube, and a solution of the standard (1,3,5-trimethoxybenzene, 2.88 mg, 0.017 mmol, 0.30 eq., 3.4 mM stock solution) in PhMe- $d_8$  (0.5 mL) was added. The sample was equilibrated at 308 K in the spectrometer for 15 min and  $^1\text{H}$  NMR spectra (AQ: 10 s, pre-scan delay 2 s, 64 scans) of the dissolved Hantzsch ester were acquired on a 600 MHz instrument at 308 K (35 °C). The fast-relaxing methyl signals of the Hantzsch ester ( $\delta$  1.08 ppm) and the standard ( $\delta$  3.38 ppm) were integrated, and the concentration of the dissolved ester calculated.

Hantzsch ester from three different suppliers was used for this study for comparison. Some of the samples were stirred (600 rpm) in a Schlenk flask at 35 °C, treated with ultrasound (5 min) at 35 °C, or equilibrated for 1 h. In all cases, the concentration of the Hantzsch ester remained roughly constant at 2.0 – 3.1 mg.mL $^{-1}$  (8.0 – 12.4 mM).

## 16 Computational details

Binary complexes consist of TiPSY, TRIP, TRIFP and TRIM with imines **3**, **4**, **5** were optimized at TPSS-D3/def2-SVP level of theory in a continuum of CH<sub>2</sub>Cl<sub>2</sub>.<sup>23,24</sup> The dielectric constant of the solvents was modified to 16.20 to mimic low-temperature NMR measurement. Subsequently, all minima were verified by frequency analysis (zero imaginary vibrational mode) and thermochemical corrections were added. Single point calculations at SCS-MP2/CBS level of theory (for extrapolation procedure see SI) were employed on top of the optimized geometry.<sup>25</sup> Software used for the optimization was Gaussian09 D.01.<sup>26</sup> For single points, ORCA 4.1 was used.<sup>27</sup> For the basis set extrapolation procedure equation S19 – S21 were used with the basis set def2-SVP and def2-TZVP (X=2,3).  $\alpha=10.39$ ,  $\beta=2.40$ .

$$E_{\text{SCF}}^X = E_{\text{SCF}}^{\infty} + Ae^{-\alpha\sqrt{X}} \quad (\text{S19})$$

$$E_{\text{corr,MP2}}^{\infty} = \frac{X^{\beta} E_{\text{corr,MP2}}^X - (X-1)^{\beta} E_{\text{corr,MP2}}^{X-1}}{X^{\beta} - (X-1)^{\beta}} \quad (\text{S20})$$

$$E_{\text{MP2}}^{\infty} = E_{\text{SCF}}^{\infty} + E_{\text{corr,MP2}}^{\infty} \quad (\text{S21})$$

For the calculation of external acidity, the structures are optimized at TPSS-D3/def2-SVP in the gas phase. A thermochemical correction was applied to the optimized geometry at the same level of theory. Solvent correction in DCM with a modified dielectric constant (16.20) to mimic low-temperature condition in the experiment was performed using SMD. Single points at SCS-MP2/CBS (using two points extrapolation from SVP and TZVP) were calculated on the optimized geometry. Software used for the geometry optimization was Gaussian09 D01, and for the single points, ORCA 4.1 was used.

## 17 Optimized geometry of most stable conformations

### TRIP/3 Type I E

```
1\1\GINC-LOGINF\Opt\RTPSSTPSS\def2SVP\W06\C65H72N1O4P1\JHIOE\20-Dec-20
14\0\#p opt tpsstps\def2svp\w06 densityfit empiricaldispersion=gd3 s
crf=(smd,solvent=ch2cl2,read)\title\0,1\p,-0.1011446316,-0.381696061
9,-1.3053979587\O,-1.3822205925,0.6833982565,-1.4840537197\O,0.8261569
238,0.4942645244,-0.1829509614\O,0.5563266402,-0.4716094397,-2.6505793
637\O,-0.5213671571,-1.5974615169,-0.4855823064\C,-1.2551259372,2.3460
146336,0.2328614085\C,-1.9467616045,1.3020957171,-0.3890764233\C,-3.26
17405104,0.8936664028,-0.0005778465\C,-3.8595223409,1.5585199933,1.061
9581279\H,-4.8753214905,1.2848511886,1.3655159574\C,-3.1739990527,2.56
69865261,1.797837331\C,-1.8420301097,2.954865256,1.4019800193\C,-1.142
3848445,3.8919479964,2.2214028534\H,-0.1141332608,4.1615451233,1.96492
31962\C,-1.7376376598,4.4468599707,3.344949566\H,-1.175092692,5.156129
2462,3.9620101474\C,-3.0664190836,4.0972562364,3.7065411205\H,-3.52790
65596,4.5474932508,4.5921384707\C,-3.7653967878,3.1712557218,2.9482729
763\H,-4.7816409884,2.8729632748,3.2301642429\C,0.0782502652,2.7703599
429,-0.2831085757\C,1.100635401,1.8250850793,-0.416500735\C,2.45779191
47,2.1792157103,-0.6940301957\C,2.7422028406,3.5128623136,-0.952248756
7\H,3.7753307261,3.8153434064,-1.1525996677\C,1.7187251932,4.504781433
6,-0.9769922452\C,0.3648476838,4.1381299387,-0.63931265\C,-0.645058534
7,5.1450354615,-0.7080545334\H,-1.682173376,4.8750714863,-0.4882273179
\C,-0.3327534006,6.4486454497,-1.0650711833\H,-1.1268808491,7.20144178
73,-1.1203611332\C,1.0063261264,6.8143282506,-1.3672265366\H,1.2409405
901,7.8483668756,-1.6425671338\C,2.0089175009,5.8581535128,-1.32557488
18\H,3.043466893,6.1238995476,-1.5712622337\C,-1.584151431,-0.64247980
26,4.5774403118\C,-1.1209128973,-1.8865528692,5.0549787737\H,-1.503949
8434,-2.2767570046,6.0043300726\C,-0.1792602886,-2.6331463375,4.339347
5748\H,0.1530479552,-3.5963942774,4.7380865851\C,0.2978735054,-2.17274
01039,3.0893781958\C,-0.154265571,-0.9187481673,2.6116485325\H,0.22824
48496,-0.5116869762,1.6730956645\C,-1.0666851908,-0.169357515,3.351355
864\H,-1.3895311471,0.8027625269,2.9662789967\C,1.252029221,-2.9835153
298,2.3179290403\C,2.2362075586,-3.8582277046,3.0352006532\H,3.1457525
741,-4.0098473292,2.4327018419\H,1.791456013,-4.8500982998,3.235886793
2\H,2.5027573277,-3.4063007309,4.0023176349\N,1.2356930519,-2.89314914
16,1.0058794202\H,0.4998414666,-2.2730453928,0.5139785958\C,2.05950063
44,-3.5754048948,0.0557666074\C,2.5970833927,-2.8139365393,-0.99896111
76\H,2.4481467889,-1.7318054497,-1.0310587026\C,3.3482297273,-3.451215
3106,-1.9936087908\H,3.7726074951,-2.8537337523,-2.8055299454\C,3.5627
213039,-4.8373838642,-1.942870646\C,3.0165881379,-5.5914380767,-0.8922
006232\H,3.1681788868,-6.6752226455,-0.853969633\C,2.256731437,-4.9682
294102,0.1070192617\H,1.7940072964,-5.5627122937,0.8988148188\C,3.5295
802695,1.1323832353,-0.6243917281\C,4.1237516198,0.6212419,-1.80629119
04\C,3.9494246799,0.6558797987,0.6513414348\C,5.1469227033,-0.34167973
28,-1.6882123345\C,4.9643844176,-0.3127586088,0.7131173509\C,5.5780927
381,-0.826898253,-0.4444970741\H,5.6134878019,-0.738942672,-2.59731778
97\H,5.2899866599,-0.6783011725,1.6920451473\C,-3.9654007275,-0.208325
259,-0.7323770024\C,-4.2151066389,-1.4497247024,-0.0817542717\C,-4.403
295985,-0.0098372208,-2.0695966473\C,-4.9251778588,-2.4479597938,-0.77
22008457\C,-5.1053468704,-1.0438093563,-2.7177715269\C,-5.3839462169,-
2.2680020434,-2.0887080028\H,-5.1175249998,-3.4011325731,-0.2664297984
\H,-5.4517075286,-0.8891770839,-3.7472221083\H,4.1508942893,-5.3304652
```

297,-2.7238786999\C,-2.6052179959,0.1681538305,5.335065329\H,-3.508443  
4011,0.3251407809,4.7170904552\H,-2.9054450054,-0.3269975374,6.2729864  
295\H,-2.2087065084,1.1708957492,5.5780871415\C,-4.1620138516,1.302235  
7229,-2.8181784096\H,-3.5824570465,1.9688809962,-2.1578208417\C,-3.716  
62582,-1.7416229063,1.3351139161\C,-6.1477767541,-3.3699028853,-2.8177  
703254\H,-6.4123095491,-2.9752442266,-3.816995764\C,-4.8741328141,-1.7  
445970824,2.3548971493\H,-4.4913677052,-1.9274040615,3.37590743\H,-5.4  
130858454,-0.780712508,2.3588972167\H,-5.6062975459,-2.5397634079,2.12  
04387604\C,-7.4614934591,-3.7284410246,-2.0929925225\H,-7.2631428158,-  
4.1521577228,-1.0911014376\H,-8.1025329606,-2.8379798441,-1.9636617143  
\H,-8.0315373383,-4.4812335604,-2.668024392\C,-5.2703783565,-4.6216812  
203,-3.0258327233\H,-5.8173414419,-5.3905275634,-3.6021295419\H,-4.344  
8254732,-4.3736324968,-3.5753544594\H,-4.9794440805,-5.0691039692,-2.0  
575222566\C,-3.3244403076,1.0856550429,-4.0950358435\H,-3.8640819756,0  
.46424008,-4.8334866901\H,-3.0996486249,2.056061072,-4.5751782701\H,-2  
.3681306169,0.5914724689,-3.8544734995\C,-5.49161126,2.0209281392,-3.1  
282191869\H,-5.3019764653,2.9932171975,-3.619204749\H,-6.1274205513,1.  
420269899,-3.8044099281\H,-6.0655255817,2.2106767394,-2.2031532434\C,6  
.6819245802,-1.8771508405,-0.3506598924\H,6.8800778546,-2.2300172072,-  
1.3804431201\C,3.6899867875,1.1018420622,-3.1920843726\H,2.7291703479,  
1.6305717226,-3.0678491395\C,3.3479003912,1.2239027685,1.9400056931\H,  
2.293905629,1.4759611072,1.729797007\C,7.9888224294,-1.2621329899,0.19  
38059568\H,8.7982594251,-2.0150629732,0.2097708636\H,8.3214870838,-0.4  
130454251,-0.4296630535\H,7.8499823746,-0.8906578788,1.2262089852\C,6.  
2551200296,-3.0985548511,0.4890707974\H,6.0774694351,-2.8212373172,1.5  
444441139\H,5.32835399,-3.54961069,0.0943915122\H,7.0453258343,-3.8713  
040344,0.4769363646\C,3.3484658765,0.2304761239,3.1153186878\H,2.92783  
43471,-0.7450445703,2.819667406\H,4.3664216465,0.0577358637,3.50984957  
81\H,2.7367437327,0.6274020137,3.9447052025\C,4.0642018684,2.533015540  
1,2.339167862\H,4.0152159138,3.2818409884,1.5298490341\H,3.6001204798,  
2.9728588915,3.2412489857\H,5.129980933,2.339091082,2.5605005348\C,4.7  
149105375,2.1021871234,-3.7673203357\H,4.8602209136,2.9651761708,-3.09  
38790327\H,5.6988094913,1.6180848551,-3.9126300714\H,4.3764001354,2.48  
58714447,-4.7474731473\C,3.4361740489,-0.0586552948,-4.1732798286\H,3.  
0681756435,0.3394937263,-5.1369221281\H,4.3571640675,-0.6321350443,-4.  
3847615549\H,2.666013465,-0.7363977543,-3.7713690267\C,-2.9158691077,-  
3.0572986217,1.4067142372\H,-3.5553232496,-3.9385314006,1.2137756621\H  
,-2.0963120255,-3.0455863227,0.6699851393\H,-2.4785703589,-3.179243202  
6,2.4142505281\H,-3.0250802425,-0.9317578031,1.6179717722\\Version=ES6  
4L-G09RevD.01\State=1-A\HF=-3216.1292922\RMSD=9.492e-09\RMSF=2.926e-06  
\Dipole=1.5171864,-2.5923313,5.0133836\Quadrupole=-9.3499642,14.769828  
1,-5.4198639,-16.1881319,-5.6158761,-12.6980384\PG=C01 [X(C65H72N1O4P1  
)]\@

### TRIP/3 Type II E

1\1\GINC-WORKER1\FOpt\RTPSSSTPSS\def2SVP/W06\C65H72N1O4P1\JHIOE\18-Nov-  
2017\0\#p tpsstps\def2svp/w06 densityfit empiricaldispersion=gd3 opt  
=rfo scrf=(smd,solvent=ch2cl2,read)\title\0,1P,-0.2018108746,-0.479  
519312,-1.1365286363\O,-1.4888799659,0.555066867,-1.4187442949\O,0.745  
140063,0.5330524499,-0.1468554076\O,0.4227141341,-0.7428866765,-2.4735  
29292\O,-0.5987915401,-1.5787810806,-0.1558074875\C,-1.4055640146,2.32  
26293766,0.1868335259\C,-2.0640816865,1.2147012501,-0.3521037113\C,-3.  
3445962131,0.765906597,0.0981551894\C,-3.93595336,1.4538511325,1.14906  
90778\H,-4.9285753976,1.1540624227,1.4999976392\C,-3.2756997034,2.5304  
993804,1.807551399\C,-1.9843533337,2.9693259214,1.3383965021\C,-1.3104  
428349,3.9902888525,2.0752945682\H,-0.3112273067,4.3049297791,1.761371  
509\C,-1.892395582,4.5687817261,3.1942999683\H,-1.3499852939,5.3424690  
115,3.7487606581\C,-3.1805882035,4.1597977157,3.6326861128\H,-3.630885  
9793,4.6270633325,4.5152180541\C,-3.8542142744,3.1581455231,2.95158738  
8\H,-4.8386894312,2.8172387723,3.2915971543\C,-0.1044459522,2.76460882  
88,-0.3917431713\C,0.9534455634,1.8539464419,-0.4863095861\C,2.2885849  
372,2.2490673438,-0.813895008\C,2.5103929728,3.5733219833,-1.165384101  
4\H,3.5258696454,3.9039804388,-1.4080243293\C,1.4450074045,4.517955293  
6,-1.2322004448\C,0.1157906494,4.1169234464,-0.8400141934\C,-0.9383075  
451,5.0742664018,-0.9446856528\H,-1.9575323898,4.774103434,-0.68376527  
42\C,-0.6900690534,6.3658077878,-1.3857420487\H,-1.5163955515,7.080761  
3854,-1.4659485662\C,0.6252990279,6.7676055216,-1.742229116\H,0.808915  
9809,7.7922939414,-2.0834694134\C,1.6688714789,5.8583696801,-1.6687667  
061\H,2.685279134,6.1519858765,-1.9551181073\C,3.3324499197,-4.4266057



7,-1.4852603703\C,2.9059958886,-3.0868051571,-1.3913445403\H,2.9941431  
363,-2.4243129247,-2.2560861318\C,2.3801944408,-2.5761283774,-0.202946  
9228\H,2.1228772123,-1.515908444,-0.1424999416\C,2.2596146252,-3.40096  
99727,0.938000838\C,2.7249359652,-4.7367554041,0.86523475\H,2.65107057  
93,-5.3926125267,1.7381960376\C,3.2360787532,-5.2392949333,-0.33284925  
59\H,3.5668631507,-6.2828999914,-0.3795357635\C,1.6785282351,-2.891943  
4757,2.1904444133\C,2.2725109115,-3.3204384185,3.497592484\H,2.1044561  
498,-2.569948057,4.2854654199\H,3.3517419625,-3.4955242285,3.372116902  
3\H,1.8113751412,-4.2697898367,3.8280775378\N,0.6664738821,-2.05527354  
82,2.1093267132\H,0.2504427154,-1.8353060108,1.1322260292\C,-0.0455995  
743,-1.4076097877,3.1657479481\C,-0.4009883364,-0.0601109453,2.9597909  
097\H,-0.1084796624,0.4370799562,2.0311292383\C,-1.1193742252,0.621716  
0421,3.94899637\H,-1.3808007724,1.6726685395,3.7952314572\C,-1.5088325  
349,-0.0391936117,5.1249337329\C,-1.181929981,-1.3918161232,5.30772552  
19\H,-1.5046983933,-1.9204668866,6.2106414399\C,-0.4524189741,-2.08433  
33981,4.3315220724\H,-0.2357864956,-3.146761679,4.4623038374\C,3.40469  
98284,1.2560309052,-0.6908451835\C,4.0055190562,0.6883461103,-1.841887  
0914\C,3.8557863627,0.8875210631,0.6100755819\C,5.0546966646,-0.238085  
7256,-1.6696307457\C,4.9039039929,-0.0392804494,0.7267201058\C,5.51685  
62168,-0.6182549214,-0.4009532472\H,5.5221838745,-0.685447437,-2.55516  
1699\H,5.2575131991,-0.3192274258,1.7244727449\C,-4.0302541159,-0.3845  
538618,-0.5732003206\C,-4.2129167886,-1.6166269369,0.1163707156\C,-4.5  
269430005,-0.233309757,-1.8959839184\C,-4.9276410956,-2.6484945703,-0.  
5179763133\C,-5.2276312382,-1.301153463,-2.488259101\C,-5.449722892,-2.  
.5134145426,-1.8165099625\H,-5.0738384261,-3.5934795843,0.0175903067\H  
,-5.6184074093,-1.1830639909,-3.5066454504\H,-2.0776815521,0.497148421  
7,5.8916644213\C,3.9290885663,-4.9646366785,-2.7617176593\H,3.60467611  
4,-6.0026164077,-2.9513076955\H,3.656318417,-4.3411032467,-3.629240825  
2\H,5.0341863543,-4.9768010249,-2.6914410581\C,-4.3448919723,1.0591625  
07,-2.6942638241\H,-3.7678620697,1.7662358511,-2.0752620798\C,-3.64529  
77972,-1.8591392691,1.5176500478\C,-6.2214241898,-3.6500830748,-2.4811  
76029\H,-6.5260757473,-3.2922775527,-3.4828251461\C,-4.7509399812,-1.7  
999851818,2.5923728205\H,-4.3198881448,-1.9384125461,3.6009767267\H,-5  
.2809109968,-0.8317999758,2.5788656031\H,-5.5017696645,-2.5964132914,2.  
.431954576\C,-7.5033569423,-3.9989567696,-1.6972705623\H,-7.2623582996  
,-4.3754581077,-0.6859553124\H,-8.1548240166,-3.1139919935,-1.58299283  
52\H,-8.0793521714,-4.7847183911,-2.2197223608\C,-5.3348676175,-4.8969  
136063,-2.6787775295\H,-5.8915793753,-5.6913331492,-3.2092227271\H,-4.  
4330343493,-4.6559355681,-3.2693817956\H,-5.0033364805,-5.30826566,-1.  
7075870694\C,-3.53382969,0.8166487045,-3.9837584695\H,-4.0722132937,0.  
147920262,-4.6807215096\H,-3.3527550745,1.7724272673,-4.5096126226\H,-  
2.5564888188,0.3625784292,-3.7482186929\C,-5.7008757831,1.7305938239,-  
2.995032241\H,-5.548996085,2.6912311293,-3.5207798124\H,-6.335465523,1.  
0924046692,-3.637074594\H,-6.2584714325,1.9351033579,-2.0631787892\C,  
6.6544072351,-1.6244707322,-0.2482632964\H,6.8941194239,-1.997955675,-  
1.2618208796\C,3.5681359265,1.0788718933,-3.2550235496\H,2.639622324,1.  
.6681225389,-3.1623511466\C,3.2630289151,1.5437693971,1.8597365791\H,2.  
2149522513,1.8046597733,1.6335198135\C,7.9240130074,-0.9524829845,0.3  
16007994\H,8.756345007,-1.6777567508,0.3754445338\H,8.2481990262,-0.10  
96713557,-0.3203779917\H,7.7452431461,-0.5594181966,1.3340555639\C,6.2  
414977895,-2.8369047696,0.6106106703\H,6.0216491225,-2.5385841252,1.65  
23444975\H,5.3410592425,-3.3254696126,0.2011722077\H,7.0546771288,-3.5  
851308175,0.641568781\C,3.2429812433,0.6285119276,3.0960991624\H,2.768  
1371951,-0.3406596261,2.870940139\H,4.2593350943,0.4300998911,3.482154  
8957\H,2.6701574108,1.1062455319,3.9105140108\C,4.0058930017,2.8627630  
914,2.1685768697\H,3.9641793751,3.5567291735,1.3107325107\H,3.55568367  
85,3.3699198816,3.0418971414\H,5.0698442515,2.6654539495,2.3955123487\H,  
4.6302125246,1.9818005443,-3.9181252451\H,4.8321337776,2.8801544413,  
-3.3078391267\H,5.5856978066,1.4402814823,-4.0483633781\H,4.2898375318  
2,3.151671963,-4.9158644725\C,3.2386619366,-0.1413107819,-4.1365605605  
\H,2.9245399412,0.1940588526,-5.1422901845\H,4.1129938858,-0.804797001  
2,-4.2673463241\H,2.4077978265,-0.7140582048,-3.6930824725\C,-2.871058  
9229,-3.1900099169,1.6050952039\H,-3.5364003233,-4.0627983953,1.471597  
3311\H,-2.0807897109,-3.2251285121,0.8381581593\H,-2.3977268137,-3.286  
2957257,2.5984207143\H,-2.9243690707,-1.0509375982,1.7272881989\|Versi  
on=ES64L-G09RevD.01|State=1-A|HF=-3216.1291108|RMSD=5.449e-09|RMSF=1.6  
36e-06|Dipole=2.1259557,-2.2091279,4.7097498|Quadrupole=-9.7895145,12.  
2537647,-2.4642502,-18.5518633,-3.2123446,-12.2003168|PG=C01 [X(C65H72  
N1O4P1)]\|@

**TRIP/3 Type I Z**

1\1\GINC-WORKER\FOpt\RTPSSTPSS\def2SVP\W06\C65H72N1O4P1\JHIOE\31-Oct-2  
015\0\#p tpsstps\def2svp\w06 sstpsfit empiricaldispersion=gd3 opt  
scrif=(smd,solvent=ch2cl2,read)\title\0,1P,-0.9340637932,-0.08720244  
43,-1.4705138207\O,-2.251404428,0.8299136683,-0.996083992\O,0.29304005  
5,0.6684969477,-0.5685879305\O,-0.7933787212,0.1177798753,-2.948977614  
4\O,-0.9962795819,-1.4670307343,-0.8157171617\C,-1.6426839449,2.023946  
5707,0.9725275202\C,-2.4488982872,1.0720365854,0.3474539537\C,-3.51403  
85802,0.3827796516,1.0075837656\C,-3.7140399715,0.6550473949,2.3555933  
083\H,-4.534148431,0.1626331029,2.8888022324\C,-2.8616236107,1.5392739  
8,3.0792593286\C,-1.7957801759,2.2271335539,2.390797635\C,-0.913490889  
,3.0481856018,3.1564453856\H,-0.0760622133,3.5426189036,2.6555045462\C  
,-1.0931237714,3.2106696127,4.5225095664\H,-0.3979354288,3.838828961,5  
.0903859828\C,-2.1666855705,2.5642821674,5.192204055\H,-2.3022998951,2  
.7066485187,6.2699182085\C,-3.0284168314,1.7425967377,4.4827354374\H,-  
3.8480568186,1.2230400758,4.992182311\C,-0.6190969887,2.7605269146,0.1  
767580716\C,0.369139991,2.0451200088,-0.5085480208\C,1.5356108945,2.67  
58160295,-1.0473612215\C,1.5875120155,4.0631586953,-1.0473067094\H,2.4  
790518892,4.567735051,-1.4350049498\C,0.5252348197,4.8534451985,-0.519  
5525091\C,-0.5894173889,4.1998508852,0.1216470427\C,-1.6360813677,5.01  
22515513,0.6539290653\H,-2.5009727841,4.5296146809,1.1189128835\C,-1.5  
780289693,6.3958998135,0.5735972028\H,-2.3974664581,6.998192704,0.9811  
893201\C,-0.4689792772,7.0383162715,-0.0396668835\H,-0.4334003639,8.13  
19247866,-0.0933680957\C,0.5587098534,6.2790334676,-0.576987775\H,1.41  
52570265,6.7622814401,-1.0606649176\C,5.0083124262,-3.1014191224,3.741  
7252019\C,5.0387516221,-2.638632073,2.4059081635\H,6.0032234575,-2.480  
531465,1.9109487048\C,3.8636469102,-2.3750353175,1.7045991732\H,3.9240  
800361,-1.9945776049,0.6819124389\C,2.6016131223,-2.5446079003,2.32820  
30464\C,2.5658400647,-2.9709914476,3.6747843652\H,1.6070398395,-3.0982  
628008,4.1860007385\C,3.7511932227,-3.260576264,4.3591504482\H,3.70031  
31393,-3.6098033976,5.3962447147\C,1.3527888313,-2.1891129634,1.633404  
6787\C,0.2239801446,-1.5623753191,2.3961286719\H,-0.5506862359,-1.1944  
395868,1.708506082\H,0.5983888034,-0.7399046714,3.0265633648\H,-0.2250  
969492,-2.3157548017,3.0688543447\N,1.1695932576,-2.354279442,0.345867  
7364\H,0.258432894,-1.9465806675,-0.0864297288\C,1.9843654975,-3.03211  
43591,-0.6138271751\C,2.2485375698,-2.3718428749,-1.8258973185\H,1.899  
8883777,-1.346646104,-1.9775400629\C,2.9919449968,-3.0290004055,-2.815  
3199601\H,3.2077233887,-2.5123184482,-3.7558827174\C,3.4630148192,-4.3  
329621055,-2.5970843348\C,3.1837246311,-4.9867509636,-1.3846833892\H,3  
.5386240103,-6.0089560773,-1.2162820555\C,2.4381854174,-4.3440669931,-  
0.3888470063\H,2.2012091426,-4.8505479959,0.5513248323\C,2.7293561156,  
1.8391943931,-1.4062490807\C,2.9146979743,1.3229421171,-2.7136740983\C  
,3.6807213646,1.5644271618,-0.3818495286\C,4.0461690826,0.5252116467,-  
2.9706285312\C,4.7839375238,0.7460560338,-0.6864139014\C,4.9842774839,  
0.2130879845,-1.9726469454\H,4.2048956614,0.1267309304,-3.9786941149\H  
,5.5127073819,0.5242266807,0.1001279279\C,-4.3741892637,-0.5807365274,  
0.2483296427\C,-4.3660038627,-1.9670925171,0.5751762846\C,-5.210658518  
4,-0.1092926593,-0.8015718668\C,-5.207734252,-2.8400216709,-0.13729569  
49\C,-6.0262733537,-1.0274668877,-1.4886996492\C,-6.0457922078,-2.3954  
405979,-1.174143667\H,-5.2006240199,-3.9050515559,0.1224597974\H,-6.67  
53707542,-0.6627513625,-2.2941414323\H,4.0446673639,-4.8428775748,-3.3  
721537672\C,6.2894332002,-3.4096544308,4.4751220265\H,6.9952025905,-2.  
5617294413,4.4118107097\H,6.1051239684,-3.6357052247,5.5379939253\H,6.  
7964224058,-4.2816379957,4.0203936997\C,-5.2891392721,1.3692730743,-1.  
1882153574\H,-4.5569999829,1.9225183452,-0.5772529914\C,-3.4611054457,  
-2.5512695889,1.6620958682\C,-6.95248188,-3.361484547,-1.9311272433\H,  
-7.4689479233,-2.7750207033,-2.7142228726\C,-4.2792087707,-3.016948557  
2,2.8843028163\H,-3.6094812686,-3.3867176897,3.6830614286\H,-4.8868777  
526,-2.1942387367,3.3012944475\H,-4.9672405794,-3.8393958119,2.6134374  
034\C,-8.032570137,-3.9584706622,-1.0049472799\H,-7.5761167036,-4.5663  
181681,-0.201986546\H,-8.6324695432,-3.1624141194,-0.5284708232\H,-8.7  
185791861,-4.612146092,-1.5746253692\C,-6.1467289132,-4.4732847548,-2.  
6335227747\H,-6.8163742049,-5.1229755469,-3.2264968808\H,-5.3886972605  
, -4.0471932633,-3.3147276135\H,-5.6221636785,-5.1125405607,-1.89952924  
35\C,-4.9163459785,1.5970413664,-2.6672131968\H,-5.6501196503,1.126328  
4207,-3.3474547129\H,-4.8974470202,2.6788613571,-2.8946387429\H,-3.918  
5483285,1.1822045142,-2.8867119609\C,-6.6788706854,1.9570257642,-0.862  
1585447\H,-6.7062601639,3.03718069,-1.0970739215\H,-7.4739920192,1.463

621889,-1.4510852745\H,-6.9233979833,1.8338177539,0.2083717522\C,6.207  
6770075,-0.6404417796,-2.2987178035\H,6.0370814894,-1.0785952099,-3.30  
03381412\C,1.9320869324,1.6727503711,-3.8309165215\H,0.9481719776,1.83  
09827972,-3.3566517355\C,3.5045135199,2.1264854194,1.033822843\H,2.914  
3898306,3.0546242824,0.9422330542\C,7.4766472609,0.2352982364,-2.38021  
07014\H,8.3548904382,-0.3698102486,-2.6717110491\H,7.355221265,1.04469  
18851,-3.1221301202\H,7.6945141596,0.7020201249,-1.4016232118\C,6.4037  
639509,-1.8031664764,-1.3065481871\H,6.6336770354,-1.4321014572,-0.291  
3208534\H,5.5016206219,-2.4360961706,-1.2464060696\H,7.2477801834,-2.4  
425696755,-1.6233892506\C,2.6942026787,1.1590151401,1.923248555\H,1.74  
34130192,0.872576904,1.4471864371\H,3.2682619921,0.2357326676,2.112182  
4856\H,2.4648089124,1.6249234914,2.899043865\C,4.833157272,2.500598359  
6,1.7165653477\H,5.4470174977,3.1624575895,1.0796277216\H,4.6316471434  
,3.0300899401,2.6653318259\H,5.4363726555,1.6079821911,1.963823288\C,2  
.3534647569,2.9885068292,-4.5209413189\H,2.4224932192,3.8186364399,-3.  
7964861971\H,3.3412397167,2.8784706002,-5.0064266277\H,1.6194860391,3.  
27345864,-5.2973164887\C,1.7451968328,0.549171382,-4.8642284979\H,0.94  
52938415,0.8246592257,-5.5744102832\H,2.6623219447,0.3691130094,-5.454  
8353663\H,1.4436538161,-0.3917504923,-4.3755813328\C,-2.5733769327,-3.  
6911754623,1.1210874359\H,-3.1751406678,-4.5663456302,0.8142385076\H,-  
1.9893165158,-3.3428352312,0.2538801435\H,-1.8710158068,-4.0333857723,  
1.9036282721\H,-2.7863160812,-1.7484408523,2.0004816947\Version=ES64L  
-G09RevD.01\State=1-A\HF=-3216.1216456\RMSD=5.883e-09\RMSF=3.873e-06\Di  
pole=4.2404585,-2.8006632,4.6126408\Quadrupole=5.2311645,2.7992244,-8  
.0303888,-18.1847555,3.3166978,-8.1927265\PG=C01 [X(C65H72N1O4P1)]\@

### TRIP/3 Type II Z

1\1\GINC-WORKER\FOpt\RTSPSS\def2SVP\W06\C65H72N1O4P1\JHIOE\01-Nov-2  
015\0\#p tpsstps/def2svp/w06 densityfit empiricdispersion=gd3 opt  
scrfl=(smd,solvent=ch2cl2,read)\title\0,1P,-0.7881161067,0.159551728  
,-1.690068728\O,-2.1419846958,0.9699931365,-1.1245056325\O,0.391113577  
3,0.7583457809,-0.6191392296\O,-0.5934618898,0.6102244498,-3.106179937  
\O,-0.8663764429,-1.3130943639,-1.2876427036\C,-1.6016610808,1.8888461  
214,1.0066390326\C,-2.3731778268,1.0197229608,0.2347930461\C,-3.433470  
7899,0.224563718,0.7709174107\C,-3.6729075092,0.3092190306,2.136386880  
5\H,-4.4952591045,-0.2646950688,2.5755884857\C,-2.8575126094,1.1001909  
848,2.9960213631\C,-1.7892386463,1.8911695511,2.4353832865\C,-0.929917  
5547,2.5988716089,3.3292790364\H,-0.0890704771,3.168883285,2.923308388  
4\C,-1.1316917201,2.5524140962,4.7012435502\H,-0.451331549,3.093220364  
3,5.3682298836\C,-2.2076387844,1.8034246781,5.2493989433\H,-2.35933537  
52,1.7801611651,6.3340152602\C,-3.0508390303,1.0914717453,4.4105187909  
\H,-3.8705226485,0.491271111,4.8216026503\C,-0.5600932025,2.7323068562  
,0.3539329384\C,0.463340096,2.1154951411,-0.372369691\C,1.6474740538,2  
.8148174573,-0.7699276191\C,1.6747441333,4.193661125,-0.6057547347\H,2  
.576106267,4.7493059286,-0.8860888107\C,0.5769535389,4.9050498097,-0.0  
385963993\C,-0.5492981412,4.166653676,0.4781535357\C,-1.6279097168,4.8  
944435268,1.0651698797\H,-2.4986292957,4.3464746583,1.4382270549\C,-1.  
5933903757,6.2787741042,1.1474877827\H,-2.4373149258,6.8175890338,1.59  
21653012\C,-0.4761648775,7.0040626755,0.6528415142\H,-0.4599094538,8.0  
969522962,0.72653743\C,0.5850812645,6.3280473926,0.0706283126\H,1.4490  
485871,6.8779004926,-0.3199033637\C,5.756105929,-4.2649721769,1.187423  
0821\C,5.0594869283,-3.1786918512,1.7636694308\H,5.4787297181,-2.67302  
48696,2.6407269114\C,3.8515279517,-2.729228695,1.2315257455\H,3.34168  
73457,-1.8786561094,1.6898755167\C,3.3047753187,-3.3408861123,0.078548  
039\C,4.0066260918,-4.4126578424,-0.51631718\H,3.6050268458,-4.9069998  
647,-1.4057964098\C,5.2011600169,-4.8761847916,0.0450681258\H,5.718161  
3481,-5.723033997,-0.4193784304\C,2.0739278515,-2.821237389,-0.5455859  
145\C,2.0198019984,-2.6832233067,-2.0369328853\H,1.0433240189,-2.30413  
12916,-2.3702538538\H,2.216678429,-3.6615908983,-2.5097498646\H,2.8223  
813351,-1.9989603569,-2.365113948\N,1.0270263788,-2.4152334313,0.13310  
3229\H,0.2423958202,-1.9348311784,-0.4466335623\C,0.7324729424,-2.5185  
370011,1.5263757387\C,0.062493086,-1.4341403391,2.1213267431\H,-0.1803  
29982,-0.5532058065,1.5208340477\C,-0.2800482663,-1.4963588462,3.47849  
78361\H,-0.7878400562,-0.6451774055,3.9425102779\C,0.0167218119,-2.644  
2599754,4.2286300913\C,0.6519683215,-3.7384745825,3.6152514019\H,0.862  
717161,-4.6455359962,4.191501137\C,1.0126541044,-3.6842797827,2.263768  
3838\H,1.4931670184,-4.5387116153,1.7798924457\C,2.8783317066,2.039364  
7533,-1.1430914298\C,3.1433828247,1.6490375191,-2.4795331647\C,3.78389  
4742,1.6920543437,-0.0985668848\C,4.3075356785,0.9026358321,-2.7476164

933\C,4.9270924411,0.9371408424,-0.4176722191\C,5.2080020691,0.5307424  
34,-1.7348563436\H,4.5284947075,0.602424248,-3.77809906\H,5.6216881318  
,0.6609325335,0.3830081282\C,-4.2700043371,-0.6418190999,-0.1206825448  
\C,-4.1882934992,-2.0600067419,-0.027920642\C,-5.1724387348,-0.0422678  
414,-1.0399485252\C,-5.0444952405,-2.8419507848,-0.8238017131\C,-5.999  
5618237,-0.8712331209,-1.8219772809\C,-5.9616872007,-2.2711368768,-1.7  
23542774\H,-4.9869593494,-3.933573188,-0.7425595488\H,-6.7038979153,-0  
.4118499699,-2.526666417\H,-0.2576364297,-2.6933072474,5.2876665721\C,  
7.0771060361,-4.7189308382,1.7563261161\H,7.057718441,-4.7259999082,2.  
86021713\H,7.3500335575,-5.7250684274,1.397540541\H,7.8815591946,-4.02  
20130911,1.450959694\C,-5.2912272783,1.4753250348,-1.1902326977\H,-4.5  
608661945,1.9430542844,-0.508956317\C,-3.1888747696,-2.758480428,0.896  
7193172\C,-6.8869112268,-3.1446052712,-2.5670729376\H,-7.4911478984,-2  
.4643332834,-3.1964814923\C,-3.8839912327,-3.3436261452,2.1435591443\H  
, -3.1419874795,-3.8069579219,2.819681345\H,-4.4243459075,-2.5661263175  
,2.7110351862\H,-4.6161896994,-4.1218832355,1.8573117854\C,-7.85938751  
23,-3.9505459699,-1.6811445071\H,-7.3131019632,-4.6572739602,-1.029371  
9645\H,-8.4551930184,-3.2827532141,-1.0334042636\H,-8.5584450018,-4.53  
8723142,-2.3036481036\C,-6.094394456,-4.0744900239,-3.5087159083\H,-6.  
7814996392,-4.6668534283,-4.1404988787\H,-5.429071996,-3.4961231481,-4  
.174315897\H,-5.4683219628,-4.783901639,-2.93681241\C,-4.9383268462,1.  
9351467516,-2.6198932927\H,-5.6621388408,1.5481430336,-3.3609552546\H,  
-4.9535324654,3.0390886504,-2.6820731768\H,-3.929551119,1.5895146743,-  
2.9026451064\C,-6.6862028599,1.9753605077,-0.7618515418\H,-6.7349564,3  
.0785008384,-0.8171434908\H,-7.4803712878,1.5694762618,-1.4150982838\H  
, -6.9131051968,1.6744489058,0.276904212\C,6.4766862598,-0.2494554731,-  
2.0718902299\H,6.4123474994,-0.5216911774,-3.1423510743\C,2.2223555164  
,2.0975222292,-3.6125574001\H,1.2109319966,2.2053097988,-3.1848325504\  
C,3.5132780547,2.0999264308,1.3538201997\H,2.8501699865,2.9807351513,1  
.3272900749\C,7.7308012922,0.6320488885,-1.8899285647\H,8.6410865084,0  
.0854284996,-2.1982154726\H,7.6629428459,1.5541750951,-2.4944096944\H,  
7.8560282311,0.9282108957,-0.8318455076\C,6.59902597,-1.5548365165,-1.  
2616386821\H,6.6993855335,-1.3493966861,-0.1807611765\H,5.7158211853,-  
2.2013846822,-1.4023710285\H,7.4922110275,-2.1249136972,-1.5765535187\  
C,2.750080029,0.9876526292,2.1033049199\H,1.8698604722,0.6556814056,1.  
5307226545\H,3.4016564242,0.1105514823,2.2658030369\H,2.4047682954,1.3  
413649767,3.0917607461\C,4.7815920113,2.5125043958,2.1224729429\H,5.34  
28471839,3.2981861039,1.5854158856\H,4.507017528,2.9078347134,3.117197  
2964\H,5.4629127749,1.6579875816,2.2872822739\C,2.6705473085,3.4755497  
572,-4.1467151612\H,2.6829116295,4.2338793145,-3.3443894994\H,3.688520  
4814,3.4186338838,-4.756268733\H,1.9839346937,3.8280926816,-4.9385491  
451\C,2.1085728151,1.0780976601,-4.75806296\H,1.3363345213,1.407361652  
5,-5.4756412708\H,3.0558066457,0.9721976303,-5.3189720095\H,1.80784158  
31,0.0875004141,-4.3786419461\C,-2.3814537623,-3.8477440587,0.16280149  
84\H,-3.0198243058,-4.6969683921,-0.1430830607\H,-1.895737052,-3.42914  
11765,-0.73312782\H,-1.5964478181,-4.2483523894,0.8292366834\H,-2.4678  
072683,-1.9966987768,1.2366137839\Version=ES64L-G09RevD.01\State=1-A\  
HF=-3216.1239436\RMSD=4.447e-09\RMSF=3.482e-06\Dipole=4.2498679,-3.659  
8844,3.5775537\Quadrupole=8.0788559,10.1302298,-18.2090857,-24.3519081  
, -2.3754396,3.9116415\PG=C01 [X(C65H72N1O4P1)]\@

### TRIP/5 Type I E

1\1\GINC-LOGIN\FOpt\RTPSSTPSS\def2SVP\W06\C65H72N1O5P1\JHIOE\05-Nov-20  
15\0\#p tpsstps\def2svp/w06 densityfit empiricaldispersion=gd3 opt s  
crf=(smd,solvent=ch2cl2,read)\title\0,1\p,0.0361088136,-0.4884509716  
, -1.3308205849\O, -1.3291085046,0.4478853205,-1.6004119637\O,0.83806249  
78,0.5116515464,-0.2163146518\O,0.7492074399,-0.570116471,-2.648599808  
8\O,-0.3033291775,-1.7069841789,-0.4793752761\C,-1.3621036321,2.264837  
2686,-0.0363916456\C,-1.9698806537,1.1338772953,-0.5924995979\C,-3.292  
076083,0.7109877254,-0.2426554307\C,-3.9863988713,1.4574051261,0.70079  
66887\H,-5.0112851524,1.174122105,0.9626552543\C,-3.3947559478,2.57083  
99291,1.3618884465\C,-2.0476222054,2.9599378849,1.0268406493\C,-1.4423  
518988,4.007215537,1.7865212907\H,-0.4032666239,4.2817161408,1.5846217  
757\C,-2.1463027287,4.6712377021,2.7805726758\H,-1.6561625971,5.466522  
3696,3.3528787765\C,-3.4950671994,4.3266339073,3.0653452454\H,-4.04413  
15265,4.8668359465,3.8441118856\C,-4.1010939054,3.2909116574,2.3727710  
197\H,-5.130212572,2.9927517939,2.6032131357\C,-0.0310540611,2.7232522  
72,-0.526395825\C,1.0501526402,1.836568598,-0.5375143619\C,2.395740369  
6,2.252851343,-0.7837065271\C,2.6132856453,3.5804439328,-1.1258544463\

H,3.6356504805,3.9306865467,-1.3021708489\C,1.5362248821,4.5011111345,  
-1.2772180026\C,0.1904716952,4.0741708794,-0.9822912351\C,-0.872901363  
3,5.0045971112,-1.1884138697\H,-1.9031827594,4.6854220959,-1.005918577  
8\C,-0.619789178,6.2942536575,-1.6321422164\H,-1.4537274803,6.98651766  
72,-1.7924441969\C,0.7102364273,6.7231855186,-1.8879756006\H,0.8972615  
404,7.7463263349,-2.2318986568\C,1.7644357897,5.8400554163,-1.71657067  
75\H,2.7936886153,6.1520679795,-1.9276327691\C,-1.5897869432,-0.753639  
7034,4.4924270742\C,-0.9909163651,-1.9058983503,5.0579878088\H,-1.3635  
679922,-2.2725946824,6.0190445706\C,0.0436842068,-2.5543381226,4.39511  
9138\H,0.4827410544,-3.4488511958,4.8469384638\C,0.488098163,-2.101286  
2795,3.1234216631\C,-0.1021210643,-0.9320674545,2.5837366084\H,0.24975  
59146,-0.5220969982,1.6347357099\C,-1.113858573,-0.2526053599,3.258568  
3621\H,-1.5307610659,0.6554571637,2.8170848879\C,1.5313865845,-2.83507  
16967,2.4073220587\C,2.5733817548,-3.5915111423,3.1787327007\H,3.50991  
83035,-3.6696340932,2.6042421093\H,2.2243282672,-4.6162874116,3.401268  
6449\H,2.7701478203,-3.0856313878,4.1357158256\N,1.5491537882,-2.79450  
64785,1.0885463019\H,0.776248624,-2.2652153069,0.5593050893\C,2.448323  
2472,-3.4501283038,0.1903858568\C,2.9377908912,-2.7074128559,-0.900481  
989\H,2.6972459955,-1.6459722124,-1.0000128904\C,3.7567551279,-3.33402  
94842,-1.8477330987\H,4.1395223319,-2.750946787,-2.6901749544\C,4.0914  
738949,-4.6901438637,-1.7129582212\C,3.5939436791,-5.4272129948,-0.626  
6471256\H,3.8375079226,-6.4897244684,-0.522446668\C,2.7640254003,-4.81  
62741805,0.3228123352\H,2.3375418409,-5.405037052,1.1386603805\C,3.524  
9248341,1.2813911211,-0.6144614765\C,4.2150081387,0.7740302802,-1.7453  
85705\C,3.9069510665,0.8777945346,0.6980212535\C,5.288184949,-0.116880  
8264,-1.5406371522\C,4.9724082674,-0.0248735095,0.8456401422\C,5.67688  
00493,-0.5370651851,-0.2601974772\H,5.8263348668,-0.5133424202,-2.4097  
413636\H,5.2662290103,-0.3383861714,1.852091299\C,-3.9122876088,-0.484  
8607718,-0.8997811353\C,-4.1422557293,-1.6712047577,-0.1476948911\C,-4  
.2930009168,-0.4281162902,-2.2673338378\C,-4.7752817536,-2.7609208219,  
-0.7717323191\C,-4.9162482918,-1.5495379733,-2.8469599054\C,-5.1728011  
706,-2.7234219353,-2.1196465624\H,-4.9517045502,-3.6713847538,-0.18717  
10854\H,-5.2176598008,-1.5070345304,-3.9010470837\H,4.7341712934,-5.17  
34872098,-2.4562312839\C,-4.0752307311,0.8237163656,-3.1191591791\H,-3  
.5590093388,1.5725123378,-2.4950493936\C,-3.6906778838,-1.8074945712,1  
.307279758\C,-5.854111004,-3.9194632566,-2.778669592\H,-6.0416229779,-  
3.6440680072,-3.8336331076\C,-4.8864650674,-1.8231317768,2.2810876185\H,  
-4.5323379401,-1.8567960629,3.3279327002\H,-5.5171024446,-0.92437238  
08,2.1605674464\H,-5.5262084738,-2.7090489339,2.1107820318\C,-7.218083  
9387,-4.2273970965,-2.1266651884\H,-7.0972255582,-4.5259974681,-1.0688  
18447\H,-7.8839513281,-3.3463122975,-2.156058096\H,-7.7235045834,-5.05  
71255844,-2.6543975585\C,-4.9453009777,-5.1659783249,-2.7745215653\H,-  
5.4288227689,-6.002112218,-3.312476749\H,-3.9770859072,-4.9567316559,-  
3.263472411\H,-4.7382274978,-5.5054685212,-1.74277088\C,-3.1688152065,  
0.541977446,-4.3346553078\H,-3.6378498395,-0.1752544133,-5.0332479016\H,  
-2.9775151073,1.4766864092,-4.8936476001\H,-2.1978695274,0.131256181  
4,-4.0107509168\C,-5.4201949172,1.4462977929,-3.5478618618\H,-5.252135  
1758,2.381857653,-4.1125451986\H,-5.9951274955,0.7599359667,-4.1964138  
53\H,-6.0450219148,1.6846829133,-2.6681620941\C,6.8300474353,-1.519832  
3379,-0.073937461\H,7.0842010933,-1.9126282829,-1.0765633683\C,3.82254  
88975,1.1720040857,-3.1696120851\H,2.8363303474,1.6633551753,-3.111152  
1054\C,3.2095116017,1.4571002857,1.9321907687\H,2.1474666991,1.6067021  
032,1.6706717704\C,8.0814980616,-0.8068785258,0.4811570527\H,8.9272682  
737,-1.5132559298,0.5704746466\H,8.3943165477,0.0226182635,-0.17786139  
88\H,7.8821085744,-0.3865973184,1.4844599113\C,6.4391945275,-2.7190390  
518,0.8139547825\H,6.2284122409,-2.4009430772,1.8513569558\H,5.5418477  
177,-3.229935452,0.42395903\H,7.2632789146,-3.4545317484,0.8537860258\H,  
C,3.2460972107,0.5312495793,3.1603322784\H,2.912060697,-0.488709326,2.  
9083779725\H,4.2601706222,0.4617236186,3.5947006134\H,2.5770657934,0.9  
230262078,3.946821706\C,3.7973014853,2.8410165618,2.2871126834\H,3.722  
9372957,3.5412683882,1.4374014199\H,3.2574284829,3.2837635295,3.144362  
4176\H,4.8644525809,2.7496587347,2.5616213957\C,4.8272886413,2.1882027  
718,-3.7520644934\H,4.9102696838,3.0865042251,-3.1153499149\H,5.835626  
6676,1.741723922,-3.8385381682\H,4.5111352706,2.5117154592,-4.76089730  
6\C,3.65832993,-0.043000891,-4.1025987951\H,3.3178560773,0.2942334066,  
-5.0991805826\H,4.6098213372,-0.5866486891,-4.2470617666\H,2.898597871  
8,-0.7321857478,-3.7000473868\C,-2.7861460037,-3.0386722579,1.51564223  
02\H,-3.3363832734,-3.983387816,1.3501035279\H,-1.9271407301,-3.003649  
7756,0.825064435\H,-2.4008047457,-3.0535897825,2.5514739278\H,-3.08154

87386,-0.9215416484,1.5474189319\O,-2.5974130641,-0.2033015798,5.20029  
66588\C,-3.2452481673,0.9692651543,4.6762596694\H,-4.0337110588,1.2242  
252426,5.398838348\H,-2.5311382219,1.8068416896,4.5919079286\H,-3.6950  
491484,0.7590201393,3.691452959\Version=ES64L-G09RevD.01\State=1-AHF  
=-3291.2958062\RMSD=6.772e-09\RMSF=3.196e-06\Dipole=1.1966014,-1.58703  
3,4.8780484\Quadrupole=-1.9335835,12.4451812,-10.5115978,-21.1545531,-  
3.6423401,-10.1591042\PG=C01 [X(C65H72N1O5P1)]\@

### TRIP/5 Type II E

1\1\GINC-WORKER1\FOpt\RTSPSS\def2SVP\W06\C65H72N1O5P1\JHIOE\15-Nov-  
2017\0\#p tpsstps\def2svp\w06 densityfit empiricaldispersion=gd3 opt  
scrf=(smd,solvent=ch2cl2,read)\title\0,1P,-0.1781494383,-0.4671782  
826,-0.989920272\O,-1.4985244671,0.4757178404,-1.4100048721\O,0.636593  
3374,0.6494521055,0.0032042554\O,0.5609794488,-0.7514112851,-2.2633652  
985\O,-0.5819139714,-1.5412014598,0.0136997444\C,-1.6422857761,2.28631  
84751,0.1429663768\C,-2.1918933566,1.1267396351,-0.4099679788\C,-3.474  
2742749,0.6113100564,-0.0425015964\C,-4.1809976548,1.2853739341,0.9446  
180497\H,-5.1778124111,0.9343349204,1.2303039673\C,-3.633559933,2.4124  
965221,1.6228340976\C,-2.3388382123,2.917788348,1.2360435275\C,-1.7780  
797316,3.989617998,1.9944241513\H,-0.7790232384,4.3556891918,1.7420230  
043\C,-2.4698747418,4.5549677639,3.0558814952\H,-2.0127877229,5.368909  
8913,3.6292483333\C,-3.7614246591,4.0811484725,3.4109017723\H,-4.29961  
83349,4.5393175178,4.2477888233\C,-4.3271603437,3.0288602174,2.7081268  
498\H,-5.3127081553,2.6384129749,2.9865914341\C,-0.341173743,2.8055438  
881,-0.3687895038\C,0.7766972693,1.9645589717,-0.3889256573\C,2.093703  
4803,2.4291630225,-0.7006043675\C,2.2449801556,3.7575500216,-1.0731511  
502\H,3.2447810922,4.1438091991,-1.2976791485\C,1.128875164,4.63652185  
55,-1.1846574198\C,-0.1881745516,4.1599794722,-0.8388288227\C,-1.29242  
693,5.0502691096,-1.0034809851\H,-2.3024970521,4.6931423077,-0.7824242  
076\C,-1.104191157,6.3490407929,-1.4530076319\H,-1.9686508074,7.010386  
1503,-1.5782739262\C,0.1980978378,6.8264601209,-1.76065674\H,0.3335101  
59,7.8561278929,-2.1092677736\C,1.2896106093,5.9819552613,-1.633809038  
3\H,2.9274362623,6.3312597475,-1.8857404365\C,3.8195666698,-3.99194329  
63,-0.879989241\C,3.7927410141,-4.8025932636,0.2828722811\H,4.33473000  
38,-5.75297985,0.2732101545\C,3.0875639814,-4.391404221,1.4074163852\H  
,3.065793069,-5.0413767917,2.2873055575\C,2.3655508164,-3.1662389296,1  
.4048734267\C,2.4278083981,-2.3589147833,0.2434399733\H,1.9822423415,-  
1.3628992475,0.247859975\C,3.1303569225,-2.7599077252,-0.8884873653\H,  
3.1532718105,-2.0958293649,-1.7527078766\C,1.5994577365,-2.7412640524,  
2.5745302936\C,2.0480818742,-3.1445103275,3.9478906039\H,1.7738911514,  
-2.3835347618,4.6955674718\H,3.1376023364,-3.2933142604,3.9599585178\H  
,1.569768325,-4.096066922,4.2444032307\N,0.5455038215,-1.9658504058,2.  
3848954925\H,0.218754164,-1.7675926869,1.3785867169\C,-0.2999922162,-1  
.3396637815,3.3501439979\C,-0.6953948916,-0.0150920946,3.0747063535\H,  
-0.3303147733,0.4772922502,2.1687731184\C,-1.5480050776,0.6498206288,3  
.9638433864\H,-1.8436889803,1.6820065394,3.7540560995\C,-2.0274108399,  
-0.0051142386,5.1097940801\C,-1.655102114,-1.3348597017,5.3613409612\H  
, -2.0457236519,-1.8598317114,6.239336772\C,-0.7940662301,-2.0104889335  
,4.4850353588\H,-0.5439372922,-3.0584701687,4.6632745163\C,3.262556472  
5,1.5005568918,-0.5665797312\C,3.8985549052,0.9644387963,-1.7170566583  
\C,3.7226387218,1.1488662771,0.7322404436\C,4.9849889076,0.0879824389,  
-1.5392174052\C,4.8057274239,0.2599085741,0.855281031\C,5.4452231917,-  
0.2928048295,-0.2676020558\H,5.4729304713,-0.3399039805,-2.423275508\H  
,5.1473617555,-0.0170844416,1.8565036242\C,-4.0314713445,-0.5947435894  
, -0.7367163804\C,-4.1896241219,-1.8230407949,-0.0345914615\C,-4.415985  
331,-0.5063871084,-2.1025597665\C,-4.7685289997,-2.9171385378,-0.70283  
8157\C,-4.9731516907,-1.6371193624,-2.729083471\C,-5.1666005743,-2.849  
8643154,-2.049535605\H,-4.8978534597,-3.8584086335,-0.1566312652\H,-5.  
2720325376,-1.5698711152,-3.782490298\H,-2.7007086875,0.5168611702,5.7  
978546482\C,-4.2669556184,0.7831926156,-2.9124955355\H,-3.8087437808,1  
.5455370465,-2.2601807055\C,-3.7310221495,-1.9994998757,1.4151460161\C  
, -5.7804532221,-4.055202175,-2.7565645712\H,-5.9609519278,-3.756903737  
9,-3.8065753766\C,-4.9274087124,-1.9968252944,2.3895262454\H,-4.577226  
2667,-2.0822605311,3.4346827367\H,-5.5198568871,-1.0693625719,2.303861  
4537\H,-5.6021897691,-2.8490506631,2.1851253541\C,-7.1404997475,-4.441  
0338207,-2.1394624398\H,-7.0244350593,-4.7597051479,-1.086977084\H,-7.  
8448171764,-3.5900510108,-2.1604964235\H,-7.5983850029,-5.2789591669,-  
2.6967539348\C,-4.8179994802,-5.2607993363,-2.7719215953\H,-5.25576208  
44,-6.1004192607,-3.3426543653\H,-3.8519675459,-4.9961753876,-3.237718

0897\H,-4.6126779686,-5.6221523053,-1.7473950587\C,-3.3288314452,0.591  
7046402,-4.1219487473\H,-3.7520126826,-0.1223444224,-4.8525349268\H,-3  
.176647657,1.5539635721,-4.6450828688\H,-2.3442907151,0.2162539618,-3.  
7969005837\C,-5.6409718651,1.3335315626,-3.3483361851\H,-5.5202667427,  
2.2938055095,-3.8827774657\H,-6.1598462365,0.6326999714,-4.0280183655\  
H,-6.295257604,1.5073257209,-2.4751093992\C,6.6014143687,-1.2853505733  
,-0.1508056662\H,6.4858794453,-1.9979360925,-0.9908856948\C,3.43838648  
88,1.3174410074,-3.1328880794\H,2.4583339142,1.8172306182,-3.045693127  
9\C,3.091139299,1.7703560967,1.9801730004\H,2.0420320767,2.0106452197,  
1.7373555244\C,7.9579599798,-0.5704274463,-0.3359389698\H,8.7901240872  
,-1.2981416898,-0.319505323\H,7.9967615018,-0.0266800932,-1.2966828525  
\H,8.1271483646,0.1617558238,0.4753472618\C,6.5837525798,-2.1039018684  
,1.1508474576\H,6.804668684,-1.4747340951,2.0325108143\H,5.6030758731,  
-2.5855600661,1.3103241101\H,7.3522194219,-2.8965595972,1.1118995929\C  
,3.0657656377,0.8306718472,3.1980229754\H,2.617542768,-0.1432417123,2.  
940716569\H,4.0778903963,0.6460383389,3.6018357055\H,2.4648360307,1.27  
85919542,4.0092794866\C,3.7965319356,3.1007231979,2.324631417\H,3.7554  
80561,3.8061808131,1.4758650887\H,3.3173159729,3.5843463788,3.19593229  
37\H,4.8603817579,2.9259695303,2.5702068593\C,4.41776034,2.3146354633,  
-3.7875839292\H,4.5265108703,3.2299476287,-3.1789781106\H,5.4217472193  
,1.8650277141,-3.9031073866\H,4.0606547754,2.6112546113,-4.7911209171\  
C,3.2299315416,0.0731082764,-4.0181753537\H,2.8650371313,0.3782857216,  
-5.0163492058\H,4.1693606338,-0.4891270504,-4.1699350283\H,2.474672203  
5,-0.5903597095,-3.5660404024\C,-2.8823569624,-3.2739901411,1.60016802  
4\H,-3.4799665991,-4.1909281355,1.4441627959\H,-2.0342606442,-3.277478  
7515,0.8966146067\H,-2.4815020919,-3.3142462301,2.6283824165\H,-3.0859  
256238,-1.1406806679,1.6655955543\O,4.5420296949,-4.4620808211,-1.9181  
182243\C,4.589209241,-3.6942069327,-3.1339414281\H,5.2136589022,-4.277  
223987,-3.8262469879\H,3.5786744992,-3.5657007673,-3.5612462846\H,5.05  
1293448,-2.7068716956,-2.9591199465\Version=ES64L-G09RevD.01\State=1-  
A\HF=-3291.2944466\RMSD=3.884e-09\RMSF=3.409e-06\Dipole=2.1363686,-1.6  
852412,4.103875\Quadrupole=-6.4812155,1.8234784,4.657737,-15.8130529,-  
7.8162481,-12.2490697\PG=C01 [X(C65H72N1O5P1)]\@

#### TRIP/5 Type I Z

1\1\GINC-WORKER1\FOpt\RTPSSTPSS\def2SVP/W06\C65H72N1O5P1\JHIOE\12-Jan-  
2016\0\#p scrf=(smd,solvent=ch2cl2,read) rtpsstpss/def2svp/w06 densit  
yfit opt empiricaldispersion=gd3\title\0,1P,-1.1092296702,0.1711880  
325,-1.524558726\O,-2.4631444731,0.8663346448,-0.82228515\O,0.11234678  
09,0.841682657\O,-0.5475568589\O,-1.0745289545,0.6684531513,-2.93866232  
32\O,-1.0301213428,-1.3081059649,-1.1514398735\C,-1.8212105922,1.74445  
41553,1.2968778755\C,-2.5922475088,0.8523150411,0.550708706\C,-3.55951  
37973,-0.0275524885,1.1306383713\C,-3.6890262363,-0.0168715692,2.51405  
73426\H,-4.4334650216,-0.6641609642,2.9896530635\C,-2.8594044168,0.794  
7439559,3.3417560206\C,-1.8981431131,1.6834276357,2.7347470031\C,-1.03  
55516896,2.4339368864,3.5902969452\H,-0.276935695,3.0843377993,3.14558  
88935\C,-1.1354623736,2.3361585852,4.9705676945\H,-0.4560509469,2.9149  
344301,5.6060038963\C,-2.1068867854,1.4879629699,5.5667586443\H,-2.180  
3078115,1.4250119476,6.6579643731\C,-2.9476609995,0.7313987623,4.76550  
58335\H,-3.6889183463,0.0597845373,5.2137031186\C,-0.9018413343,2.6894  
993556,0.6006932164\C,0.0978110291,2.1862979483,-0.2396022368\C,1.1901  
661971,2.9923915654,-0.694335399\C,1.1458093904,4.3567252977,-0.439913  
564\H,1.9808121355,4.9897143997,-0.7591211873\C,0.0571060792,4.9557983  
139,0.2582141899\C,-0.9778197404,4.1131803824,0.8049980648\C,-2.055911  
4657,4.7323287802,1.5074039785\H,-2.8643097676,4.1078802685,1.90025301  
89\C,-2.0998181072,6.1080803971,1.6793342815\H,-2.9419946602,6.5618825  
996,2.2132832077\C,-1.0664945014,6.934399128,1.161325687\H,-1.11071597  
25,8.0191587936,1.30791423\C,-0.0124619791,6.3666870219,0.4623641377\H  
,0.7847426832,6.9951203717,0.0489546243\C,5.2812077427,-3.1363954115,2  
.8570930326\C,5.2345490679,-2.5323757041,1.5783325198\H,6.149580298,-2  
.2534155934,1.0509491614\C,4.0022596671,-2.2770295089,0.9803744559\H,3  
.9906377743,-1.7818228104,0.0065531748\C,2.7843939409,-2.5888281266,1.  
6345737859\C,2.8495039061,-3.1553584685,2.9347384422\H,1.9296728843,-3  
.3966016272,3.4752641106\C,4.0729475521,-3.4427996087,3.528510442\H,4.  
1253390401,-3.901675218,4.5203093396\C,1.4891655967,-2.2382382728,1.04  
88685923\C,0.3471013034,-1.8320979863,1.9352675094\H,-0.467351611,-1.3  
986568595,1.3372666631\H,0.6850486213,-1.1112173962,2.6963034832\H,-0.  
0405649979,-2.720600214,2.4661722914\N,1.2532913384,-2.2169227913,-0.2  
445825607\H,0.3007814936,-1.8134110782,-0.5681029493\C,2.0580192546,-2

.6895335716,-1.3271401411\C,2.2411028043,-1.8384679085,-2.4304020104\H  
.1.836047036,-0.8232430377,-2.4109272613\C,2.9751126577,-2.2947476927,  
-3.5337583425\H,3.1295184184,-1.6280217403,-4.3883575902\C,3.516984322  
1,-3.5894568542,-3.5369750382\C,3.3175093351,-4.4361195427,-2.43276285  
04\H,3.7273725288,-5.4516500059,-2.4370527005\C,2.5832247094,-3.994587  
531,-1.3253917029\H,2.4103981891,-4.6499148991,-0.4665713746\C,2.41831  
01989,2.3297684561,-1.2478654681\C,2.5612847968,2.0619840188,-2.632640  
3401\C,3.4475717254,1.9614422005,-0.333711208\C,3.7250505724,1.4054006  
848,-3.0775716392\C,4.5833740936,1.2943723475,-0.8276886221\C,4.740362  
5714,1.0013480351,-2.1947391697\H,3.8474737986,1.1948243691,-4.1457642  
347\H,5.3723180037,1.001583945,-0.1268147036\C,-4.4052057322,-0.902196  
3641,0.256158123\C,-4.2717524156,-2.3189744991,0.3059509984\C,-5.35662  
4435,-0.314034523,-0.6221389157\C,-5.1028944056,-3.1103967154,-0.50673  
03543\C,-6.1596798378,-1.151984505,-1.4183827982\C,-6.0543291324,-2.55  
13093146,-1.3771411746\H,-4.9969026196,-4.2005015743,-0.4622474771\H,-  
6.8976173646,-0.6985287528,-2.0912630704\H,4.0916470595,-3.9418242154,  
-4.3999757377\C,-5.571217531,1.1992048045,-0.7023417941\H,-4.829478380  
1,1.686829992,-0.048191612\C,-3.2458298893,-3.0134315718,1.2036200173\  
C,-6.9401379596,-3.4312220475,-2.2547162881\H,-7.5964456165,-2.7544565  
433,-2.8336812459\C,-3.9314801943,-3.7427246262,2.3776358578\H,-3.1771  
142815,-4.1919437966,3.0501535591\H,-4.5525348044,-3.0508233364,2.9738  
092834\H,-4.5874750068,-4.5555931671,2.0140712818\C,-7.8459367467,-4.3  
50125035,-1.4093141182\H,-7.2476952103,-5.063430133,-0.8125310762\H,-8  
.4696453063,-3.763103752,-0.7114876519\H,-8.5190088974,-4.9382845612,-  
2.0598936566\C,-6.1064327823,-4.2487998668,-3.2632353011\H,-6.76616639  
42,-4.8374219071,-3.9269915811\H,-5.4848340405,-3.5889147944,-3.894384  
8786\H,-5.4322913202,-4.9558535786,-2.7452536457\C,-5.3440135299,1.738  
8975021,-2.1289377212\H,-6.0912879209,1.3388216515,-2.8389380634\H,-5.  
4306398398,2.8410910332,-2.1397691534\H,-4.3377280553,1.4703562832,-2.  
4919611987\C,-6.9645554483,1.5879425499,-0.1652981283\H,-7.0897441698,  
2.6864338298,-0.1710467896\H,-7.7712781182,1.1527359781,-0.7834628476\  
H,-7.1029197867,1.2332827245,0.8720843478\C,5.9965392048,0.3096523777,  
-2.7185230582\H,5.8092412356,0.0615568606,-3.7803876057\C,1.4975995637  
,2.5299795621,-3.6257431384\H,0.5329525771,2.531156611,-3.0896465203\C  
,3.3180277783,2.2561647017,1.1654115411\H,2.6624470252,3.1379920737,1.  
2668239878\C,7.2077005386,1.2656147014,-2.6666403692\H,8.1056791178,0.  
7860615998,-3.0980232359\H,7.0080252607,2.1938189341,-3.231254015\H,7.  
4410640501,1.5469249094,-1.622940538\C,6.3020985373,-1.0069761572,-1.9  
776521876\H,6.5422646563,-0.8239212378,-0.9146065367\H,5.4452967092,-1  
.7010359743,-2.0233753009\H,7.1740179283,-1.5110247223,-2.4329468723\C  
,2.6283702396,1.0898344583,1.9048108071\H,1.6754089529,0.8156818245,1.  
4255560068\H,3.2753022985,0.1957138451,1.9048822928\H,2.4200137745,1.3  
61527821,2.9558300233\C,4.6560430485,2.6075501489,1.8414580752\H,5.181  
74508,3.4198126484,1.3079227932\H,4.4753676325,2.9413931553,2.87925064  
64\H,5.3345053698,1.7363137895,1.8927659561\C,1.7934486959,3.974095076  
3,-4.0859804885\H,1.8425689918,4.6684700743,-3.229192659\H,2.759921677  
1,4.0266589614,-4.6214215934\H,1.002668669,4.3330848907,-4.7704216605\  
C,1.3263638049,1.5955563331,-4.8350003795\H,0.4719881916,1.9323321432,  
-5.4488523213\H,2.2186212554,1.5895173357,-5.4880930819\H,1.1128019001  
,0.5640278958,-4.5101745266\C,-2.3347960702,-3.9717029512,0.4096574723  
\H,-2.9026656457,-4.8240047697,-0.0065374805\H,-1.8431055878,-3.435865  
1797,-0.4184441202\H,-1.5520394411,-4.3901432689,1.0693157605\H,-2.598  
9672146,-2.2312458847,1.6321607815\O,6.4180978953,-3.4434489309,3.5138  
892824\C,7.6843375259,-3.1564993698,2.8969725965\H,7.806338607,-2.0708  
111247,2.730466031\H,8.4458846251,-3.5088549692,3.6075083294\H,7.79079  
12574,-3.6983696371,1.9398686315\Version=ES64L-G09RevD.01\State=1-A\H  
F=-3291.2863205\RMSD=5.374e-09\RMSF=2.838e-06\Dipole=5.4796889,-3.0811  
753,3.6300334\Quadrupole=21.6585226,-3.3372323,-18.3212903,-19.2188332  
,-1.9982115,-0.658707\PG=C01 [X(C65H72N1O5P1)]\@

### TRIP/5 Type II Z

1\1\GINC-LOGIN\FOpt\RTPSSTPSS\def2SVP\W06\C65H72N1O5P1\JHIOE\11-Nov-20  
15\0\#p scrf=(smd,solvent=ch2cl2,read) rtpsstps/def2svp/w06 densityf  
it opt empiricaldispersion=gd3\title\0,1\P,-0.9271628176,0.149049036  
1,-1.6171742066\O,-2.3448528319,0.8038624058,-1.0060483287\O,0.2023742  
776,0.8463235748,-0.5518749056\O,-0.808834494,0.6505260656,-3.02445203  
05\O,-0.8478336237,-1.3322406899,-1.2529894316\C,-1.8698582546,1.68572  
19063,1.1573512892\C,-2.5572782567,0.7723778459,0.3569636109\C,-3.5200  
955928,-0.1524260621,0.8687623355\C,-3.75426233,-0.1455426129,2.237252



666\H,-4.5106442797,-0.8152552924,2.6585962174\C,-3.0159463187,0.69239  
75484,3.1217125786\C,-2.039804961,1.6101512317,2.5868268331\C,-1.24608  
97186,2.3639235352,3.5035047256\H,-0.4709267073,3.0305561445,3.1146616  
826\C,-1.4273900188,2.2423547077,4.8737683645\H,-0.7969622322,2.820554  
0909,5.5581969119\C,-2.4183866428,1.3688777817,5.3975410884\H,-2.55597  
66887,1.2873020695,6.4812525711\C,-3.1936671537,0.6090355678,4.5356935  
446\H,-3.9440758381,-0.086992993,4.9273405348\C,-0.9352688279,2.662712  
1479,0.5284282789\C,0.128971611,2.1918887593,-0.2494244974\C,1.2162786  
321,3.0342817659,-0.6477249086\C,1.1076047561,4.3972342248,-0.40473352  
31\H,1.9342710198,5.0594690794,-0.6841058905\C,-0.0361127103,4.9592835  
263,0.2327417565\C,-1.0688896412,4.0828803567,0.7283115389\C,-2.201512  
4,4.6672554468,1.3722826562\H,-3.0068238841,4.0166845406,1.7267492332\  
C,-2.3010979047,6.0414348063,1.5343582307\H,-3.1842005323,6.4682486077  
,2.0225214365\C,-1.2718868698,6.9013839084,1.0648062253\H,-1.360938143  
5,7.9845098623,1.2028142193\C,-0.1644261667,6.3675911393,0.4247169836\  
H,0.6316368415,7.0210757631,0.0499747088\C,6.1497051338,-3.4711263567,  
0.931040562\C,5.2871393158,-2.5868420812,1.6256018549\H,5.6603100091,-  
2.0853064572,2.5234950384\C,4.0040797007,-2.3490877983,1.1560969741\H,  
3.3673288724,-1.6418754613,1.6910045923\C,3.5337996466,-2.9642028334,-  
0.0355640198\C,4.4144787898,-3.8282015779,-0.7289833154\H,4.089700029,  
-4.3164055962,-1.6520710714\C,5.6971438271,-4.1012317503,-0.2500769431  
\H,6.3410501305,-4.7878648781,-0.8043357089\C,2.2261591296,-2.62963268  
87,-0.6044526159\C,2.0683458651,-2.574149876,-2.0968272371\H,1.0693487  
354,-2.2087727427,-2.3755854295\H,2.2056171035,-3.5861384304,-2.519492  
1779\H,2.8463664661,-1.9253467428,-2.5337891308\N,1.1623577572,-2.3176  
552888,0.1084889402\H,0.3270148408,-1.9106568484,-0.4463542846\C,0.917  
4193931,-2.4386260739,1.5090574309\C,0.1687228824,-1.4198777762,2.1262  
451628\H,-0.1659111627,-0.5619971753,1.5363785118\C,-0.1348326646,-1.5  
176392689,3.4908776807\H,-0.705617296,-0.7173739726,3.9718175886\C,0.2  
811097963,-2.6358436277,4.2290104906\C,0.9965199334,-3.6671142279,3.59  
49862277\H,1.3016305784,-4.5535151406,4.1611502364\C,1.3165322149,-3.5  
768250916,2.2353443267\H,1.8612618298,-4.382411899,1.7356119456\C,2.50  
15832373,2.4253658662,-1.1300663784\C,2.7318231665,2.1570372839,-2.502  
6017431\C,3.5022591116,2.123011176,-0.1605315696\C,3.9531960723,1.5653  
727383,-2.8804795811\C,4.6952350462,1.5130134739,-0.5874623384\C,4.941  
1942388,1.2243305753,-1.9424217724\H,4.1454108487,1.3600972059,-3.9395  
801389\H,5.4576371401,1.258937195,0.1568754202\C,-4.272785673,-1.06257  
39228,-0.0543999184\C,-4.0048953431,-2.4587388735,-0.0663222542\C,-5.2  
787290707,-0.5249008908,-0.9036908643\C,-4.7772815977,-3.2879374167,-0  
.9023688287\C,-6.0192770587,-1.3958075759,-1.7221084278\C,-5.790676155  
2,-2.782979061,-1.7332268767\H,-4.5801735003,-4.3665387665,-0.91324101  
56\H,-6.7997009399,-0.9765881059,-2.3680066573\H,0.037242746,-2.711617  
9521,5.293900802\C,-5.5887624498,0.9727244119,-0.9451241217\H,-4.90802  
14132,1.4797232884,-0.2406958774\C,-2.9001830901,-3.0775184436,0.79328  
16153\C,-6.6163463106,-3.7155221564,-2.6152833814\H,-6.2038413133,-4.7  
334774224,-2.4831398564\C,-3.4742225461,-3.7474008067,2.0592884447\H,-  
2.6589535927,-4.1592774024,2.68230867\H,-4.0464283266,-3.033783661,2.6  
765239283\H,-4.1518986708,-4.5795405544,1.7909588525\C,-6.4948437048,-  
3.3519568162,-4.1090701265\H,-6.9165105026,-2.3508897935,-4.3150297735  
\H,-5.4387647409,-3.3479600909,-4.4328521701\H,-7.0431264912,-4.081409  
1337,-4.7330976659\C,-8.0926360722,-3.7474264754,-2.1677808018\H,-8.67  
1735106,-4.4643171882,-2.7786337548\H,-8.1813323297,-4.0492884405,-1.1  
08681379\H,-8.5634435648,-2.7527666679,-2.278018465\C,-5.3218795057,1.  
5656521506,-2.3440566917\H,-6.0061956695,1.1391935078,-3.1008903064\H,  
-5.4744010932,2.6608586831,-2.3333336668\H,-4.2840718598,1.3656219593,  
-2.6599054678\C,-7.0270172701,1.2669289295,-0.470946522\H,-7.214817898  
1,2.3563445934,-0.4570759409\H,-7.7761203346,0.8054159495,-1.140465045  
1\H,-7.1979672216,0.8779018357,0.5491114623\C,6.2414620843,0.557543302  
1,-2.3850681197\H,6.2191292739,0.5066245587,-3.4901125684\C,1.70289397  
33,2.5622590716,-3.557152213\H,0.7110683344,2.5172403457,-3.0761977349  
\C,3.282152534,2.42902108,1.3254920997\H,2.5657800031,3.2662770337,1.3  
819999934\C,7.4808557893,1.3803148988,-1.9796117095\H,8.4027012486,0.9  
123106611,-2.3711015947\H,7.424503354,2.4102067181,-2.37566829\H,7.578  
8892882,1.4434271434,-0.8802225434\C,6.3330516322,-0.8860563667,-1.850  
4180819\H,6.3541211007,-0.9004068227,-0.7457031661\H,5.4663680527,-1.4  
862688533,-2.1773137773\H,7.2511271217,-1.3848991742,-2.2121154729\C,2.  
6336594151,1.2303545387,2.0481501655\H,1.7492109858,0.8659805909,1.50  
31348599\H,3.3514920967,0.3952872119,2.1280780467\H,2.3191018472,1.508  
0092625,3.0705938502\C,4.5608548696,2.8784659428,2.0556796508\H,5.0478

226226,3.725279572,1.539298415\H,4.3136455262,3.2004628183,3.083451276  
2\H,5.2985538354,2.059464265,2.1385863265\C,1.9483787009,4.0152876098,  
-4.0194813322\H,1.9112044252,4.7207666828,-3.170978945\H,2.9400558091,  
4.1146746651,-4.4996447958\H,1.1804608706,4.3241182852,-4.7528025953\C  
,1.651292118,1.6072452713,-4.7616828437\H,0.7947874383,1.8664263855,-5  
.4088649271\H,2.564864922,1.6702766385,-5.3815899114\H,1.5153598693,0.  
5638498832,-4.4323066\C,-2.0281642703,-4.0757948384,0.0064473223\H,-2.  
5855117781,-4.9945017509,-0.2534466006\H,-1.6513139165,-3.6149532266,-  
0.9203592881\H,-1.1608876492,-4.3808657456,0.619319895\H,-2.2407531396  
,-2.2538529695,1.1140513458\O,7.3784156257,-3.6327199418,1.4625051097\  
C,8.3343425186,-4.4602226994,0.7793347088\H,9.2521821273,-4.4133402905  
,1.38318441\H,7.9830720409,-5.5062181209,0.7193474467\H,8.5372659539,-  
4.0721219763,-0.235384756\Version=ES64L-G09RevD.01\State=1-A\HF=-3291  
.2880073\RMSD=3.413e-09\RMSF=3.667e-06\Dipole=5.3948157,-3.9796762,2.9  
356407\Quadrupole=20.9109014,5.5462067,-26.4571081,-36.0685686,-10.332  
1824,8.2564397\PG=C01 [X(C65H72N1O5P1)]\@

#### TRIP/4 Type I E

1\1\GINC-WORKER\FOpt\RTSPSS\def2SVP\W06\C65H69F3N1O4P1\JHIOE\02-Nov  
-2015\0\#p tpsstps\def2svp\w06 densityfit empiricdispersion=gd3 op  
t scrf=(smd,solvent=ch2cl2,read)\title\0,1P,-0.109718774,-0.3573603  
171,-1.294242209\O,-1.4059605,0.689443719,-1.4432557164\O,0.8125294974  
,0.510889129,-0.1648483771\O,0.5386069783,-0.4215333245,-2.6453122079\  
O,-0.5021267686,-1.5975479976,-0.4935434475\C,-1.2636000457,2.35902061  
56,0.2670881476\C,-1.9599797521,1.31236728,-0.3437343432\C,-3.27330588  
6,0.9061167639,0.0551453418\C,-3.8584897812,1.5680309049,1.1269077985\  
H,-4.8690848086,1.291053347,1.4450248594\C,-3.1662162699,2.5798026284,  
1.8526551171\C,-1.839423873,2.9697408916,1.4409861864\C,-1.1310452591,  
3.9093754299,2.2499163612\H,-0.1065482205,4.1807818555,1.9797764212\C,  
-1.7140490875,4.4638306586,3.3799043457\H,-1.145403997,5.1740061583,3.  
9902767585\C,-0.0374170943,4.1121249677,3.7572376001\H,-3.4868742848,4.  
5583993702,4.65086276\C,-3.744279808,3.1848827903,3.0092288095\H,-4.7  
525210795,2.8788198181,3.3091259211\C,0.0637007319,2.7858165962,-0.261  
8174201\C,1.0861252558,1.8429508929,-0.401558036\C,2.4418102457,2.1940  
91079,-0.6891361347\C,2.7246838107,3.5270538337,-0.9504348483\H,3.7561  
295648,3.8310208216,-1.1563619494\C,1.7015931799,4.5201267924,-0.96118  
92569\C,0.3491045317,4.1541843305,-0.6164382958\C,-0.6584536574,5.1643  
757658,-0.6688604294\H,-1.6950707649,4.8942932065,-0.4468693674\C,-0.3  
449934697,6.470656411,-1.0149715343\H,-1.1373891649,7.2261106393,-1.05  
63396188\C,0.9928802707,6.835565198,-1.3235870588\H,1.2285915692,7.871  
761472,-1.589640368\C,1.9922638913,5.8754118242,-1.3020662199\H,3.0255  
841466,6.1401241222,-1.5541612564\C,-1.5417975113,-0.7023400352,4.5134  
144505\C,-1.098002335,-1.9477779989,4.9842954445\H,-1.4963207862,-2.35  
82420513,5.9157003817\C,-0.1422436718,-2.6629728061,4.254929129\H,0.19  
63308841,-3.6341801743,4.6257882404\C,0.3446269576,-2.1553367449,3.029  
8504447\C,-0.1013121331,-0.8943221579,2.5733882216\H,0.2962797311,-0.4  
619260434,1.6528843861\C,-1.0329378653,-0.1699429966,3.3159893561\H,-1  
.3654936249,0.8085538489,2.9597321586\C,1.3266493989,-2.9438494846,2.2  
534347511\C,2.35345384,-3.7560704019,2.9810732412\H,3.2565498716,-3.90  
02530192,2.3676532286\H,1.9451065911,-4.752761501,3.2304064132\H,2.617  
551791,-3.2580432972,3.9263172982\N,1.2779071228,-2.8833089926,0.94488  
03605\H,0.5186533558,-2.2797825493,0.4500611943\C,2.0998196674,-3.5766  
401372,0.0007301427\C,2.5981883259,-2.8431784092,-1.0920686712\H,2.417  
7564447,-1.7681105534,-1.1684273414\C,3.3542026046,-3.5009555983,-2.06  
97947129\H,3.7500622858,-2.9269102431,-2.912463901\C,3.6079921315,-4.8  
773456455,-1.9655295909\C,3.0958036608,-5.6036539748,-0.8784654273\H,3  
.2771699843,-6.6805321479,-0.7993671979\C,2.3340079651,-4.9608337532,0  
.1056045483\H,1.8997139007,-5.5330481202,0.9291948958\C,3.502977603,1.  
1370071386,-0.6162092502\C,4.0811814644,0.6006952281,-1.7947592185\C,3  
.9119628409,0.6610772036,0.6633486485\C,5.0679187919,-0.3984332952,-1.  
6704597399\C,4.8907355028,-0.3436610984,0.7314164474\C,5.4776957114,-0.  
.8938615728,-0.4233967635\H,5.516066663,-0.8217008705,-2.5767315305\H,  
5.2065778048,-0.7108682971,1.7127817273\C,-3.9772716736,-0.1873921317,  
-0.6890623388\C,-4.2488629151,-1.4320521944,-0.0541442904\C,-4.3746879  
617,0.0185173489,-0.0394651507\C,-4.9191253367,-2.4336505194,-0.779580  
5816\C,-5.0403938615,-1.0178282123,-2.7201597147\C,-5.3218510002,-2.25  
25782247,-2.1137207441\H,-5.1236489161,-3.3905812045,-0.2855833279\H,-  
5.3535568044,-0.8582960799,-3.7593715044\H,4.1999195616,-5.3854412944,

-2.7339841719\C,-2.5873869336,0.0853348723,5.264191335\C,-4.1427953147  
.1.345810086,-2.7650378311\H,-3.5781705289,2.0097409198,-2.0893048843\  
C,-3.8254391755,-1.7333663197,1.3851889397\C,-6.0275363027,-3.36404478  
94,-2.885857728\H,-6.2587314221,-2.9641305253,-3.8912096803\C,-5.05023  
20327,-1.8464250269,2.3156456218\H,-4.7333239528,-2.0307918626,3.35756  
81306\H,-5.6506891927,-0.9195681199,2.3008355585\H,-5.7079126414,-2.68  
08102595,2.0082609995\C,-7.3609152618,-3.7662087155,-2.2237055741\H,-7  
.1949636763,-4.1965393714,-1.2188091872\H,-8.0318516812,-2.8953388219,  
-2.1136412384\H,-7.8835339458,-4.5268342391,-2.8322735541\C,-5.1087054  
949,-4.5901315868,-3.0699865763\H,-5.6090203804,-5.364230879,-3.680598  
145\H,-4.1660920279,-4.3111875069,-3.5737771965\H,-4.8505367346,-5.043  
9163141,-2.095202318\C,-3.2981081819,1.1701490771,-4.0435314734\H,-3.8  
246247598,0.5556823995,-4.7969358917\H,-3.0915384725,2.1546379996,-4.5  
02436576\H,-2.3324769391,0.689964596,-3.8132122528\C,-5.482879048,2.04  
90352983,-3.0686487236\H,-5.3061997029,3.0336125838,-3.5398993439\H,-6  
.1042531837,1.4508887013,-3.7604316288\H,-6.0654063588,2.2121095713,-2  
.1438625093\C,6.5359609513,-1.9895745871,-0.3259719886\H,6.6704241126,  
-2.3986443525,-1.345155072\C,3.6617885902,1.0904952621,-3.1818392236\H  
2.7026436255,1.622792976,-3.0611909548\C,3.3389406885,1.268693787,1.9  
468603078\H,2.2878367104,1.5407420538,1.7449334408\C,7.8907746272,-1.4  
055853721,0.1280278109\H,8.6697979993,-2.1899061676,0.1505434282\H,8.2  
288819165,-0.6051988651,-0.5541979465\H,7.81263928,-0.9744765333,1.143  
5002159\C,6.0994983696,-3.1509062457,0.5896211474\H,6.0062700925,-2.82  
41495678,1.6414216216\H,5.1275103317,-3.5662829215,0.2716632863\H,6.84  
56806726,-3.9656560708,0.5610938242\C,3.3327221135,0.3024085965,3.1438  
222733\H,2.8826650209,-0.6680677263,2.8770327694\H,4.3518637482,0.1110  
008798,3.5266548782\H,2.744747971,0.7330188195,3.9736397928\C,4.087641  
8329,2.5709244509,2.3093144117\H,4.0435409249,3.3036773514,1.485077510  
5\H,3.6433265616,3.038710756,3.2072432298\H,5.1520377037,2.3604226187,  
2.5219411934\C,4.6962967408,2.0900155743,-3.74196737\H,4.8387598123,2.  
9499966059,-3.064318199\H,5.6797534761,1.6025893199,-3.8786639357\H,4.  
3694501196,2.478857269,-4.7240236408\C,3.4115375294,-0.0592122852,-4.  
1758494042\H,3.036123603,0.3481126828,-5.1327075646\H,4.3354446149,-0.  
6232176064,-4.4007581331\H,2.6483400163,-0.7486204469,-3.7807104565\C,  
-2.9396218741,-2.9932522246,1.4713166558\H,-3.4951321186,-3.9042343875  
,1.1811240983\H,-2.0626866654,-2.8914583624,0.8109351839\H,-2.58304618  
58,-3.1374977491,2.5073269349\H,-3.2159174618,-0.8877767991,1.74253925  
03\F,-2.1487465604,1.3300440191,5.5879275108\F,-2.9746152331,-0.513784  
3813,6.4143657928\F,-3.71138162,0.2599688152,4.5115553746\\Version=ES6  
4L-G09RevD.01\State=1\A\HF=-3513.6481424\RMSE=4.153e-09\RMSF=3.907e-06  
\Dipole=2.849708,-3.4998936,3.9681325\Quadrupole=-8.0234894,24.4394016  
,-16.4159121,-17.477505,5.1432742,-16.6101589\PG=C01 [X(C65H69F3N1O4P1  
)]\@

#### TRIP/4 Type II E

1\1\GINC-WORKER1\FOpt\RTPSSTPSS\def2SVP\W06\C65H69F3N1O4P1\JHIOE\14-No  
v-2017\0\#p tpsstps\def2svp\w06 densityfit empiricaldispersion=gd3 o  
pt scrf=(smd,solvent=ch2cl2,read)\title\0,1\p,-0.2667730295,-0.48422  
68119,-0.9655294984\O,-1.6764577934,0.2727502067,-1.4585974175\O,0.420  
748542,0.7790668108,-0.0538523712\O,0.507711914,-0.7954824299,-2.20985  
82922\O,-0.5657742842,-1.514335124,0.1212546417\C,-1.9999824256,2.2085  
908524,-0.0941524777\C,-2.434703809,0.9538193888,-0.5266487094\C,-3.66  
8988831,0.3649111244,-0.1113253274\C,-4.4459517699,1.0685201661,0.7987  
403062\H,-5.4112197108,0.6586137479,1.1125763598\C,-4.013046023,2.3054  
578911,1.357902102\C,-2.7650613109,2.8844089138,0.9245518619\C,-2.3149  
653627,4.0771437734,1.567960249\H,-1.3497029877,4.5056583187,1.2846733  
885\C,-3.0704158226,4.6835358068,2.5611490152\H,-2.6972196821,5.591335  
5596,3.0477652916\C,-4.3183794672,4.1329787054,2.958428553\H,-4.907677  
3623,4.6249497997,3.7398454336\C,-4.7759038069,2.9650307672,2.36849446  
86\H,-5.725214644,2.516191855,2.6823143601\C,-0.7426193689,2.790378268  
3,-0.6441125488\C,0.4506925228,2.0670058572,-0.5505205031\C,1.72815130  
36,2.6373537049,-0.8478987685\C,1.7627944025,3.9298015568,-1.354299025  
3\H,2.7293122747,4.3945498891,-1.5769086514\C,0.570515327,4.6684555152  
,-1.6058258924\C,-0.7053880007,4.096387276,-1.252384559\C,-1.886592092  
9,4.8435438618,-1.5444821323\H,-2.8631583803,4.4076233096,-1.313285032  
7\C,-1.8118266752,6.0985161429,-2.1308403486\H,-2.7321406756,6.6494839  
556,-2.3538576283\C,-0.5522411021,6.6730610461,-2.4507414225\H,-0.5069  
284554,7.6673029057,-2.9084184246\C,0.6133107406,5.9672676513,-2.19690  
75501\H,1.5901890926,6.3927312101,-2.4537688517\C,3.9941011914,-3.4713

650311,-0.502055767\C,3.9016776786,-4.2748166333,0.6497344487\H,4.4498  
398766,-5.2195995581,0.708169533\C,3.1139310148,-3.8558006407,1.724336  
0629\H,3.0388930772,-4.4836868601,2.6167661177\C,2.3995596364,-2.63748  
36701,1.6476647772\C,2.5106791718,-1.8381294428,0.4904164793\H,2.03990  
01358,-0.8535492018,0.4513596855\C,3.2967515839,-2.2583553469,-0.58424  
08907\H,3.3800183854,-1.6278480794,-1.4696569526\C,1.588875032,-2.1697  
04279,2.7929821269\C,2.1131117272,-2.3661331167,4.1806806634\H,1.72237  
12404,-1.6068861378,4.8755378104\H,3.2131923565,-2.3340041054,4.168480  
5139\H,1.8091886323,-3.3610548362,4.5569458058\N,0.4647736378,-1.54812  
62209,2.5276077087\H,0.1265020872,-1.4963722862,1.4907593038\C,-0.4414  
94713,-0.9131098287,3.4316244865\C,-0.9513400891,0.3367453896,3.028608  
6115\H,-0.6356725181,0.7638717254,2.0725918554\C,-1.8479187247,1.01357  
72052,3.8632756321\H,-2.2265806538,1.994579574,3.5623835475\C,-2.26386  
27965,0.4339706689,5.0724946495\C,-1.7817764631,-0.8302377446,5.447181  
155\H,-2.123868169,-1.297365837,6.3764254849\C,-0.8676460171,-1.511955  
1732,4.6317121817\H,-0.5221021875,-2.5109904272,4.9073557562\C,2.98182  
01475,1.8738034584,-0.5457940595\C,3.7732413854,1.3336298915,-1.590749  
6198\C,3.3832576664,1.7127215517,0.8125669945\C,4.9551467265,0.6418373  
068,-1.2562122635\C,4.5692434909,1.0136320134,1.0918670305\C,5.3671921  
452,0.4612545632,0.0721917174\H,5.5647493944,0.2078325873,-2.058234389  
\H,4.8797329836,0.8905605673,2.1340789655\C,-4.1220183746,-0.942418465  
, -0.6890653354\C,-4.1200338099,-2.1229041984,0.1056192925\C,-4.5777333  
262,-0.9915900026,-2.0334523646\C,-4.6213737266,-3.313649115,-0.450014  
6348\C,-5.0569612846,-2.2123057626,-2.5458004398\C,-5.0966901367,-3.38  
26932706,-1.7716836891\H,-4.6260963999,-4.2211259285,0.1637208133\H,-5  
.4118563101,-2.2538966161,-3.5830730366\H,-2.9744802493,0.962808554,5.  
7162443812\C,4.9533096297,-3.8510823981,-1.601572669\C,-4.569650096,0.  
2411608468,-2.9391499172\H,-4.1885080116,1.0919710626,-2.349318289\C,-  
3.5756957088,-2.1319243119,1.5364232541\C,-5.6180083404,-4.6916510977,  
-2.3582547896\H,-5.9424488595,-4.4756864366,-3.3937069874\C,-4.7129364  
932,-2.0610380014,2.5770558224\H,-4.2996737421,-2.0269225526,3.6018991  
435\H,-5.3401649897,-1.1644608579,2.4339146654\H,-5.3697359914,-2.9480  
249678,2.5029896896\C,-6.8436254786,-5.2183073269,-1.583905151\H,-6.58  
04382978,-5.4693078968,-0.5396375762\H,-7.6525527954,-4.4662315406,-1.  
5586598701\H,-7.2410530764,-6.1340417655,-2.0589523104\C,-4.5062911862  
, -5.7585350672,-2.4303657861\H,-4.8781811769,-6.6770555962,-2.92068304  
95\H,-3.6374033078,-5.3894352834,-3.0038898164\H,-4.1527387423,-6.0350  
874667,-1.4199559019\C,-3.6159408743,0.0520089548,-4.1371067493\H,-3.9  
617501595,-0.7587784521,-4.8048847215\H,-3.5612413851,0.9799001595,-4.  
7362637767\H,-2.5982924444,-0.1928048758,-3.7891140665\C,-5.9919958225  
,0.6178394585,-3.4025677646\H,-5.9687978851,1.5440073273,-4.0057720004  
\H,-6.4407175063,-0.1777866035,-4.0252505038\H,-6.6595677734,0.7901864  
206,-2.5390965025\C,6.6461652983,-0.3092456848,0.3881059994\H,6.920210  
7648,-0.8615734065,-0.529790006\C,3.3832249968,1.4783478649,-3.0633303  
093\H,2.369543417,1.9131724017,-3.0977150213\C,2.5741344633,2.34306265  
89,1.9496458683\H,1.5156110099,2.355121376,1.6382268206\C,7.803804703,  
0.6562943686,0.7193125654\H,8.7406886375,0.0980452542,0.9018589202\H,7  
.9823351867,1.3634359481,-0.1104645452\H,7.5765849706,1.2470845285,1.6  
262412495\C,6.4487918006,-1.3464049406,1.5105806592\H,6.2675022737,-0.  
8604734102,2.4868362764\H,5.5927058036,-2.0080999703,1.2955442404\H,7.  
3507863407,-1.9759770533,1.6160381536\C,2.6433289284,1.5580373229,3.27  
10567075\H,2.4034084985,0.492443426,3.1187559425\H,3.6434341611,1.6183  
158019,3.7375167779\H,1.9184025022,1.9706590864,3.9947652151\C,3.00350  
75887,3.8114506125,2.162263618\H,2.8936168381,4.3967320554,1.232717565  
1\H,2.3853283114,4.2899068789,2.9441901046\H,4.0617476875,3.8667846112  
,2.4775263283\C,4.3361332316,2.4533017841,-3.7857746246\H,4.3517094821  
,3.4404950151,-3.2900312512\H,5.371039077,2.0635083857,-3.7959937363\H  
,4.0188492601,2.6013277699,-4.8344803908\C,3.3099904964,0.1186952256,-  
3.7873060109\H,3.042805691,0.2701722287,-4.8495540577\H,4.2759950209,-  
0.4172204202,-3.7613813311\H,2.5331333962,-0.5142115408,-3.3274674928\  
C,-2.6683093365,-3.348407799,1.8083003154\H,-3.2371385737,-4.296323648  
,1.8033945534\H,-1.8659624209,-3.4095207601,1.0554578228\H,-2.20029659  
21,-3.2532983199,2.8040813722\H,-2.9500317286,-1.230765247,1.651966373  
5\F,6.2246290698,-3.4498575254,-1.3006541497\F,5.012484536,-5.19069905  
14,-1.8013362778\F,4.6395170229,-3.2779862725,-2.7885683682\\Version=E  
S64L-G09RevD.01\State=1-A\HF=-3513.6475568\IRMSD=4.622e-09\IRMSF=2.137e-  
06\Dipole=0.7626886,-0.5536626,6.3107523\Quadrupole=-12.5253742,2.8609  
116,9.6644626,-7.9254801,7.5318361,-22.800375\PG=C01 [X(C65H69F3N1O4P1  
)]\@

**TRIP/4 Type I Z**

1\1\GINC-LOGIN\Fopt\RTPSSTPSS\def2SVP\W06\C65H69F3N1O4P1\JHIOE\06-Nov-2015\0\#p tpsstps\def2svp\w06 densityfit empiricdispersion=gd3 opt  
scr=(smd,solvent=ch2cl2.read)\title\0,1P,-1.3767794771,0.24655287  
43,-1.4249894344\O,-2.7941818784,0.6318210781,-0.6232544182\O,-0.23906  
65089,0.9712573912,-0.3924392285\O,-1.4630017243,0.9045205355,-2.76911  
40266\O,-1.0595524323,-1.2386041817,-1.2407791184\C,-2.2195443529,1.40  
25377171,1.5589476585\C,-2.8709211585,0.4745361809,0.7452861266\C,-3.6  
797989741,-0.5886207967,1.2562558663\C,-3.7682417813,-0.7221474869,2.6  
362266874\H,-4.3961516731,-1.5123253476,3.0609637876\C,-3.0463655838,0  
.1287258446,3.5226900569\C,-2.2462467862,1.2030721285,2.9860690467\C,-  
1.4876987212,2.0015323931,3.8950649994\H,-0.8465371609,2.7948968202,3.  
4999107661\C,-1.5413134767,1.7739988308,5.2626198329\H,-0.9453356484,2  
.3954563684,5.9400475403\C,-2.3572240814,0.737987999,5.7919000967\H,-2  
.3953857772,0.5727720901,6.8741550867\C,-3.0893152927,-0.0695891414,4.  
9359005429\H,-3.7090933633,-0.8830365098,5.330288001\C,-1.4742547169,2  
.5361360601,0.9398521309\C,-0.4409344553,2.2693626643,0.0359508982\C,0  
.4938775254,3.2698846967,-0.3785262413\C,0.2520354056,4.5842204948,-0.  
0012383682\H,0.9642845199,5.3655739779,-0.2873626275\C,-0.8877017441,4.  
.94443775,0.775416469\C,-1.7613978322,3.9084466271,1.2691208607\C,-2.8  
994050922,4.2913710712,2.0415615343\H,-3.5879993817,3.5175746679,2.394  
3887691\C,-3.152041252,5.6248625019,2.3280951477\H,-4.0376523613,5.896  
1802221,2.9131863176\C,-2.276194334,6.6423687728,1.862775714\H,-2.4843  
093544,7.6912920098,2.1004957616\C,-1.1688479439,6.3057432314,1.099770  
0789\H,-0.4926818654,7.0827097826,0.7251932994\C,5.7011960454,-2.90735  
22974,1.9319028094\C,5.4611642687,-1.9306761728,0.9483941271\H,6.28989  
39277,-1.3509696484,0.5321055722\C,4.1591512041,-1.6964609322,0.507200  
983\H,3.9775016365,-0.925833253,-0.2458893334\C,3.078957015,-2.4230663  
257,1.0602443476\C,3.3274340673,-3.3765629286,2.0692748456\H,2.5025269  
58,-3.9407757544,2.5129167878\C,4.6373201644,-3.6303757525,2.491907880  
6\H,4.8273222657,-4.3830211046,3.2617740372\C,1.6892655128,-2.12931876  
85,0.6387921939\C,0.6101274289,-2.0163106659,1.669974531\H,-0.32215952  
4,-1.6442308228,1.2225501994\H,0.9373688626,-1.3518320782,2.4862260918  
\H,0.4246332175,-3.0110758214,2.1148596347\N,1.3610430186,-1.922449500  
9,-0.6086257702\H,0.3308222032,-1.6101148397,-0.8182078426\C,2.1470405  
516,-2.0740532484,-1.7940417058\C,2.0708750487,-1.0492103252,-2.753303  
7522\H,1.4898715416,-0.1463745375,-2.5469083756\C,2.7717081652,-1.1861  
554293,-3.9582041879\H,2.7223607057,-0.3845078062,-4.701789485\C,3.535  
2576551,-2.337552009,4.2047946238\C,3.5969021824,-3.3596614883,-3.242  
3050185\H,4.1812240846,-4.264906343,-3.437465373\C,2.9004332496,-3.237  
5327924,-2.0335475155\H,2.9249680471,-4.0382561116,-1.2888334204\C,1.7  
791128358,2.8570190217,-1.0356205698\C,1.9094178025,2.7946043501,-2.44  
59397072\C,2.8799410934,2.5220881006,-0.195168049\C,3.1402781647,2.382  
5725346,-2.9924528223\C,4.0812991537,2.0980626339,-0.7912110558\C,4.23  
20543301,2.0169028211,-2.1879753524\H,3.2548603734,2.3377230861,-4.081  
1704439\H,4.9272539581,1.832342722,-0.1481767323\C,-4.4206629741,-1.49  
47363443,0.3213314286\C,-4.0828131256,-2.872921908,0.2313157266\C,-5.4  
869816779,-0.9749005722,-0.4668487686\C,-4.8312841315,-3.701306944,-0.  
6274288372\C,-6.1993772783,-1.8442973976,-1.3104960511\C,-5.893038185,  
-3.2135796425,-1.4045490697\H,-4.5758454148,-4.7659343209,-0.695751582  
9\H,-7.025995468,-1.4402668232,-1.9067854466\H,4.0801157247,-2.4420796  
451,-5.1488092619\C,7.1239670385,-3.1885663353,2.3523035431\C,-5.91642  
33866,0.492456067,-0.3954238256\H,-5.2258396151,1.0201770853,0.2830299  
058\C,-2.9319326113,-3.4909992292,1.0285231831\C,-6.690079279,-4.14296  
99764,-2.3153895743\H,-6.244079656,-5.1507988674,-2.2181911967\C,-3.46  
05929439,-4.4255935596,2.1364655406\H,-2.6256209459,-4.822573803,2.743  
1737057\H,-4.1537216143,-3.8953907068,2.8134297404\H,-4.0040878225,-5.  
2865033879,1.7047017997\C,-6.5814196161,-3.7230854579,-3.795450536\H,-  
7.0243412297,-2.7238210048,-3.9618470155\H,-5.5269103536,-3.6849193737  
,-4.1219333175\H,-7.1163963443,-4.4407835275,-4.4442521401\C,-8.164314  
7356,-4.239120964,-1.8712262005\H,-8.7152120098,-4.9616425206,-2.50106  
92877\H,-8.2432335175,-4.5703547746,-0.8201372068\H,-8.6722002113,-3.2  
607185301,-1.9587080665\C,-5.8253848617,1.1871080419,-1.7693150835\H,-  
6.5337506704,0.7453588364,-2.4942015977\H,-6.0723335497,2.2605346461,-  
1.672801624\H,-4.8061558047,1.1057152139,-2.1828837236\C,-7.3289569642  
,0.6256225872,0.2116323069\H,-7.6062862112,1.6907112366,0.3172786216\H  
,-8.0901753031,0.1405078442,-0.4268248472\H,-7.3768329188,0.1580816786  
,1.2116870171\C,5.5510650824,1.5755455491,-2.8176169418\H,5.372473572,

1.4765680501,-3.9049841757\C,0.7545912062,3.218218742,-3.3533922545\H,  
-0.178613605,3.0437915785,-2.7906402049\C,2.759452476,2.5964873542,1.3  
313432036\H,1.9654869272,3.3283786568,1.5590313234\C,6.6456002198,2.64  
50912505,-2.61679882\H,7.584959661,2.3433654206,-3.1158149352\H,6.3331  
787977,3.6195968448,-3.0328528562\H,6.8638270389,2.7896221708,-1.54236  
6831\C,6.0175346485,0.2039237091,-2.2917576062\H,6.2568463686,0.249825  
1575,-1.2141613623\H,5.2412634127,-0.5661291288,-2.4402584454\H,6.9304  
780699,-0.1240228522,-2.8213201012\C,2.3085997729,1.2419128361,1.91826  
0845\H,1.4060971344,0.8670310841,1.4103370383\H,3.1044246479,0.4853450  
453,1.8016475133\H,2.0843149086,1.337607744,2.996457792\C,4.0427660891  
,3.0900978039,2.0236829997\H,4.3956713003,4.0436304768,1.5912430848\H,  
3.8511903727,3.2528077455,3.0997474132\H,4.8632869671,2.3536088528,1.9  
455893151\C,0.8533116126,4.7258333996,-3.6730875446\H,0.865089269,5.33  
30153222,-2.7511885836\H,1.7787276112,4.9482349941,-4.2368132264\H,-0.  
0076276482,5.0522157483,-4.2853580852\C,0.6501412154,2.3891531827,-4.6  
451615253\H,-0.256263625,2.6817496359,-5.2049025245\H,1.5157848278,2.5  
478069887,-5.3142995909\H,0.5631622242,1.3144852979,-4.4168694507\C,-1  
.9250649071,-4.2219610361,0.117003636\H,-2.3853307701,-5.0937487411,-0  
.3829500673\H,-1.537779064,-3.5374851018,-0.6553697252\H,-1.0718898156  
,-4.5973535428,0.711630754\H,-2.3889162107,-2.6671767134,1.5201725787\  
F,7.8494099881,-2.0472447346,2.4741740988\F,7.1970523202,-3.8397477942  
,3.5373869918\F,7.7719340916,-3.961047448,1.4378734929\\Version=ES64L-  
G09RevD.01\State=1-A\HF=-3513.6376244\RMSE=3.255e-09\RMSF=3.330e-06\Di  
pole=3.454906,-2.6199941,2.4671866\Quadrupole=-11.3044578,11.9802623,-  
0.6758045,-2.8141134,-18.2693491,1.9611717\PG=C01 [X(C65H69F3N1O4P1)]\  
\@

#### TRIP/4 Type II Z

1\1\GINC-LOGIN\Opt\RTPSSTPSS\def2SVP\W06\C65H69F3N1O4P1\JHIOE\04-Nov-  
2015\0\#p tpsstps\def2svp\w06 densityfit empiricaldispersion=gd3 opt  
scrf=(smd,solvent=ch2cl2,read)\title\0,1\P,-0.7874149284,0.22628034  
98,-1.6259996263\O,-2.0706616353,1.1115262042,-1.0214850983\O,0.413482  
7813,0.6514924458,-0.5032426239\O,-0.5369256679,0.7411256897,-3.010223  
6749\O,-0.9806107609,-1.2602207958,-1.316405964\C,-1.5301897732,1.7844  
038075,1.2022871668\C,-2.3407314421,1.0539918385,0.3310060536\C,-3.474  
173752,0.2928485459,0.7571839107\C,-3.7701785437,0.2877994168,2.113739  
238\H,-4.650195965,-0.2566722186,2.470656785\C,-2.9382872938,0.9414331  
492,3.0671408315\C,-1.7817605357,1.678355953,2.6194904738\C,-0.9086490  
986,2.2258297191,3.6075218931\H,-0.0019743147,2.7460198171,3.287920416  
5\C,-1.1811310922,2.0882096384,4.9608908995\H,-0.4887229439,2.50838214  
08,5.6986221243\C,-2.3455687741,1.4017475862,5.3981252781\H,-2.5538392  
617,1.306458034,6.4693383543\C,-3.2027979828,0.8378595377,4.4663901189  
\H,-4.0910524538,0.2834620167,4.7893928892\C,-0.3933446284,2.587711015  
4,0.6648914651\C,0.5868361652,1.9647701594,-0.1168748973\C,1.840857782  
2,2.5872771038,-0.4174288\C,2.0122480538,3.915372674,-0.0544953194\H,2  
.9627633443,4.4141435551,-0.2691613193\C,0.9847832092,4.6543975652,0.6  
002821575\C,-0.2354007326,3.9857241031,0.9778343035\C,-1.2523433996,4.  
7497977146,1.6266417546\H,-2.1959929025,4.2640206421,1.8923488481\C,-1  
.0663925376,6.0958102988,1.9062024686\H,-1.8647606033,6.6638970322,2.3  
963458014\C,0.1468532625,6.7466725678,1.5547550094\H,0.2825566282,7.80  
90030352,1.7851180023\C,1.1486925253,6.0377668997,0.9108365495\H,2.084  
7769244,6.5300201089,0.6234557909\C,5.6707189036,-3.9066530163,1.20867  
28893\C,4.9345728336,-2.8571646802,1.7836479224\H,5.3318009267,-2.3106  
334162,2.6434557452\C,3.6958728318,-2.5047334071,1.2446219231\H,3.1302  
734003,-1.6814957202,1.6848611797\C,3.1984960161,-3.1774807674,0.10762  
20154\C,3.9434659067,-4.2325335203,-0.4589420234\H,3.5639635353,-4.768  
3371791,-1.333361548\C,5.1682848861,-4.6078417392,0.1006533969\H,5.741  
5635135,-5.4288107392,-0.3391617159\C,1.9611278497,-2.6946160589,-0.55  
12390322\C,2.0064474798,-2.4053985582,-2.0180864328\H,1.0118287725,-2.  
157473526,-2.4147012025\H,2.4306754164,-3.2657213184,-2.5629715022\H,2  
.6933053955,-1.5527827901,-2.1800055302\N,0.8633258233,-2.4190950394,0  
.1020498235\H,0.0697105395,-1.9308056704,-0.4751035057\C,0.5478376482,  
-2.6402894195,1.4774337859\C,-0.1613895451,-1.6245654413,2.1434727686\  
H,-0.4146019914,-0.7039053568,1.6111360745\C,-0.5235133512,-1.80624144  
69,3.4843769534\H,-1.0659705476,-1.0115624303,4.0058913632\C,-0.200997  
4295,-3.001181339,4.146246010\C,0.4840598063,-4.0206819232,3.46309321  
4\H,0.7195030794,-4.9616952815,3.9711018508\C,0.8623886229,-3.84859998  
72,2.1261010724\H,1.3773571854,-4.6477083638,1.5861605191\C,2.96535486  
99,1.7816487047,-1.0034952221\C,3.1126059614,1.6850926796,-2.414635493

1\C,3.8909646246,1.1217014081,-0.1458855576\C,4.1733159106,0.924705088  
5,-2.942948035\C,4.9310091205,0.3710750208,-0.7309324166\C,5.095282489  
1,0.2564720545,-2.120836002\H,4.2913915511,0.8514462003,-4.0297947353\  
H,5.6368244277,-0.1379370638,-0.0630728923\C,-4.3101790571,-0.46103268  
27,-0.2323849771\C,-4.3125675841,-1.8857005308,-0.226997137\C,-5.11755  
47207,0.2449661713,-1.1636762133\C,-5.1509371838,-2.5656435263,-1.1281  
926868\C,-5.9309925232,-0.4847085728,-2.0515955292\C,-5.9706036797,-1.  
8878490917,-2.0480806383\H,-5.1552293431,-3.6616105527,-1.1178669529\H  
,-6.5599647686,0.0580543706,-2.7679849238\H,-0.4923641561,-3.143859728  
9,5.1921122149\C,7.0575902267,-4.214323704,1.7151007157\C,-5.152975793  
9,1.7735156045,-1.2164351395\H,-4.4357053911,2.1547483393,-0.470709382  
6\C,-3.4161367063,-2.6964484299,0.7124874835\C,-6.8722425342,-2.649324  
3675,-3.0161370591\H,-7.3770028965,-1.8955953634,-3.6494126639\C,-4.21  
57502726,-3.299122046,1.8865680598\H,-3.5415520922,-3.8400665962,2.576  
3340562\H,-4.7416421278,-2.5208306681,2.4663029105\H,-4.9743770846,-4.  
0157836106,1.5199309209\C,-7.9652584464,-3.4385569681,-2.2660100363\H,  
-7.5208676683,-4.2084802065,-1.6084728979\H,-8.5794407296,-2.769598663  
6,-1.6367236303\H,-8.6367944901,-3.9514070423,-2.9790112045\C,-6.05896  
73448,-3.5733972299,-3.9455438182\H,-6.7209554989,-4.0655062566,-4.681  
5557944\H,-5.2904312108,-3.0050777216,-4.4992596347\H,-5.5461246992,-4  
.3669967236,-3.3716511508\C,-4.7079898197,2.307362692,-2.5932893854\H,  
-5.4165388921,2.0139394292,-3.3899455717\H,-4.6600700016,3.4119998315,  
-2.5791861223\H,-3.7078608613,1.9233166546,-2.8553676202\C,-6.54259697  
84,2.3162128676,-0.8220939015\H,-6.5388025508,3.4217841245,-0.81383331  
33\H,-7.3211196025,1.9875364679,-1.5349857146\H,-6.8355175573,1.968092  
7861,0.1849244551\C,6.2484820032,-0.5449428754,-2.7189434673\H,6.11247  
41331,-0.5368576371,-3.8167510929\C,2.1780405468,2.4502309351,-3.35287  
31302\H,1.2065467232,2.5476240125,-2.8390122807\C,3.9219513192,1.20776  
91547,1.3891542991\H,4.5488022988,0.3502577365,1.6947336498\C,7.607249  
2297,0.1171743659,-2.4073766032\H,8.4320047057,-0.437045198,-2.8920292  
032\H,7.6370036276,1.1612149756,-2.7669028919\H,7.8008086258,0.1264143  
302,-1.3186523119\C,6.2358231127,-2.0141877425,-2.2529244287\H,6.40641  
066,-2.0937044798,-1.1641908021\H,5.2710789935,-2.4987855082,-2.482716  
7331\H,7.0350090697,-2.5890715533,-2.7558397205\C,4.6680176911,2.47617  
98836,1.8600421941\H,5.6622491014,2.5547218524,1.3852928767\H,4.097629  
5257,3.3889591483,1.6146214811\H,4.811456143,2.4518813221,2.9562688185  
\C,2.5825048383,1.053861317,2.1373577047\H,1.9418937781,0.2809839438,1  
.6822771717\H,2.7780083352,0.759625405,3.1845476188\H,2.0095710436,1.9  
943805496,2.1627855124\C,2.7305854762,3.8680027848,-3.6200172005\H,2.8  
774814319,4.4317336599,-2.6828266437\H,3.7057786418,3.8142766244,-4.13  
94148976\H,2.033845668,4.4420123508,-4.2585195866\C,1.9066292237,1.721  
9237153,-4.6805554439\H,1.1171170807,2.2532185401,-5.2412146313\H,2.80  
3473791,1.6893803776,-5.3266369219\H,1.5526478279,0.6941235888,-4.5020  
194865\C,-2.6350127956,-3.799537101,-0.0295388161\H,-3.302760923,-4.60  
39074411,-0.3892795391\H,-2.0928028549,-3.3777091132,-0.8907341125\H,-  
1.8991724784,-4.2632091133,0.6521758057\H,-2.6717449897,-2.0016494092,  
1.134060521\F,8.0000514085,-3.5213794817,1.0126116739\F,7.3729170017,-  
5.5269569649,1.5929593901\F,7.2213539277,-3.8794052784,3.01783289\Ver  
sion=ES64L-G09RevD.01\State=1-A\HF=-3513.6399301\RMSD=8.508e-09\RMSF=  
.912e-06\Dipole=2.5170886,-3.1192182,2.9213827\Quadrupole=-11.8023807,  
14.9443711,-3.1419904,-2.9768099,-14.7376395,10.745599\PG=C01 [X(C65H6  
9F3N1O4P1)]\@

### TiPSY/3 Type I E

1\1\GINC-WORKER\FOpt\RTSPSS\def2SVP\W06\C71H56N1O4P1Si2JHIOE\14-No  
v-2015\0\#p tpsstps\def2svp\w06 densityfit empiricdispersion=gd3 o  
pt scrf=(smd,solvent=ch2cl2,read)\title\0,1\p,0.0271360249,-0.455654  
1517,-1.3679264174\O,-1.2252385205,0.6664027762,-1.4897294063\O,1.0201  
660404,0.3020819767,-0.2177591154\O,0.6377616976,-0.4954772242,-2.7377  
757827\O,-0.4561135271,-1.6878765063,-0.6263464762\C,-0.9222865077,2.3  
353223991,0.197521279\C,-1.7343894169,1.388719127,-0.4326406445\C,-3.1  
172601293,1.1977469414,-0.1208016188\C,-3.638093044,1.9384450666,0.936  
6330576\H,-4.6918529604,1.8331832997,1.2172420458\C,-2.8345721697,2.82  
93122558,1.7078164392\C,-1.4517365266,3.0238543543,1.3512663091\C,-0.6  
511875325,3.8574542842,2.1897045016\H,0.4111071448,3.9833334203,1.9615  
731735\C,-1.1956185268,4.4883527941,3.2992418897\H,-0.5574949051,5.112  
7770451,3.9341956049\C,-2.5692004086,4.3279608217,3.6242486048\H,-2.98  
72026412,4.83821519,4.4987080599\C,-3.3689630064,3.5091078834,2.842833  
8212\H,-4.4244179671,3.3551779083,3.094297501\C,0.4538983812,2.6286463

738,-0.297399578\C,1.4140482082,1.6153435107,-0.39416672\C,2.811198601  
3,1.8790157704,-0.5622011828\C,3.1856159291,3.1975960704,-0.8105310649  
\H,4.2448724572,3.4558185788,-0.9223885145\C,2.231189441,4.2494504894,  
-0.9258970879\C,0.8436058275,3.9722252314,-0.6521710993\C,-0.094029117  
4,5.0416402487,-0.7757559873\H,-1.1560087976,4.8438687005,-0.604718998  
6\C,0.3197527039,6.3169874404,-1.1323225737\H,-0.4212680937,7.11772751  
07,-1.2331495368\C,1.6919155295,6.5933944673,-1.3757630136\H,2.0041381  
953,7.6066879426,-1.6507164799\C,2.6267993499,5.5754856067,-1.27500353  
15\H,3.6876691777,5.7695987759,-1.4705017311\C,-2.0692894001,-0.579226  
9252,4.3046825651\C,-1.9554338307,-1.8925932429,4.8087724333\H,-2.5121  
663131,-2.1749659365,5.7090645129\C,-1.1434217982,-2.8407399128,4.1800  
325995\H,-1.0850277324,-3.8518052743,4.593856728\C,-0.4385936507,-2.51  
12732051,2.9978403154\C,-0.538790375,-1.1902737985,2.4960341811\H,0.02  
64388311,-0.8876936479,1.6118989813\C,-1.3324425895,-0.2472793537,3.14  
6259655\H,-1.3825617137,0.7697813117,2.7463787893\C,0.3789467192,-3.52  
68473899,2.3213246743\C,0.9588189993,-4.6660150046,3.1042871298\H,1.86  
56659644,-5.0609964237,2.622152105\H,0.2227396879,-5.4884502057,3.1697  
487123\H,1.195623611,-4.3429862218,4.1281562323\N,0.5871275227,-3.4055  
59958,1.0287435055\H,0.1300598005,-2.6001933744,0.4717745354\C,1.37771  
9551,-4.2307337181,0.1714906903\C,2.254977876,-3.5694451323,-0.7089761  
15\H,2.3359375432,-2.4808434455,-0.6802317086\C,3.0365936739,-4.318351  
0096,-1.5955880294\H,3.728250859,-3.7995187589,-2.2663927523\C,2.93004  
46577,-5.7183917137,-1.6217336286\C,2.0318174425,-6.3692325561,-0.7613  
825622\H,1.9296174824,-7.4590738393,-0.7928645452\C,1.2483805343,-5.63  
12353193,0.1373732931\H,0.5248841691,-6.1353145121,0.7830878967\H,3.53  
9606324,-6.3011725838,-2.320398084\C,-2.9633953865,0.4407655188,4.9627  
46879\H,-3.8829789381,0.5820313971,4.3629859381\H,-3.2650583632,0.1261  
885443,5.9754673722\H,-2.4680824118,1.4249628532,5.0249111523\Si,-4.20  
69035614,-0.0368111634,-1.0884052729\C,-3.6159782114,-1.8021352917,-0.  
7600917841\C,-3.4484323979,-2.2579010665,0.5677965377\C,-3.3393978893,  
-2.7022462486,-1.8115454298\C,-3.0293900069,-3.5687982787,0.8352404492  
\H,-3.6379526102,-1.5791782089,1.4082983718\C,-2.9083302606,-4.0117878  
644,-1.5494775845\H,-3.4500656139,-2.3741250625,-2.8521260899\C,-2.754  
7721615,-4.4481159752,-0.2248318931\H,-2.907157411,-3.900130644,1.8721  
783566\H,-2.6874028035,-4.69130741,-2.3806773642\H,-2.419282273,-5.471  
0314647,-0.0180897809\C,-5.9700052891,0.1720890224,-0.4018498707\C,-6.  
64918888,-0.859081084,0.2841829037\C,-6.6543796173,1.3983652519,-0.592  
3417141\C,-7.954464383,-0.6744052395,0.7708142629\H,-6.155789334,-1.82  
55192486,0.4396370148\C,-7.9565540313,1.5892213071,-0.1077020221\H,-6.  
1629919056,2.2189748723,-1.1302287707\C,-8.6101398103,0.5507616176,0.5  
772682534\H,-8.4601665196,-1.4908978043,1.2989992633\H,-8.4644924285,2  
.5474775405,-0.2662297152\H,-9.6285179654,0.6967235464,0.9551973985\C,  
-4.3288210567,0.2715391773,-2.9645692789\C,-5.5713913447,0.0075650266,  
-3.5942684778\C,-3.2521455459,0.675786967,-3.79058081\C,-5.7338241525,  
0.1414918024,-4.9821127761\H,-6.4311673721,-0.3094286548,-2.9921980676  
\C,-3.4137986161,0.8165738734,-5.1779583534\H,-2.2712877911,0.86428261  
55,-3.3466444297\C,-4.6537108414,0.5502116541,-5.7794199581\H,-6.70650  
57612,-0.0725238604,-5.4399458132\H,-2.5624720655,1.1323650903,-5.7920  
432339\H,-4.7771986611,0.6584336747,-6.8631048296\Si,4.1530051841,0.57  
17825749,-0.2099143371\C,3.6817159196,-0.4017150072,1.3484663571\C,4.1  
391498444,-1.7209000459,1.5663073092\C,2.9340630248,0.2171446383,2.378  
6009352\C,3.8639164329,-2.3964544234,2.7664661051\H,4.7142567727,-2.23  
71990807,0.7893953304\C,2.6596494057,-0.4521003586,3.5807250265\H,2.55  
24871467,1.2361754157,2.2404545378\C,3.1255677667,-1.7620107408,3.7779  
003317\H,4.2228077615,-3.4221360303,2.908724365\H,2.071338209,0.044940  
4922,4.3599965022\H,2.9067041494,-2.2885593963,4.7135159796\C,5.744967  
6224,1.5384453184,0.1864387034\C,6.0767067236,1.9037698,1.5114362424\C  
,6.6133127437,1.9553323807,-0.8508123562\C,7.2283461477,2.656321641,1.  
7919093544\H,5.4287042693,1.5934747973,2.3402419765\C,7.764721182,2.70  
99130646,-0.5762841315\H,6.3874649803,1.6862105692,-1.8898109842\C,8.0  
74794321,3.0615587905,0.7474789003\H,7.4668597281,2.9250092347,2.82742  
16423\H,8.4219882071,3.0222227929,-1.3959954689\H,8.9750991727,3.64775  
94423,0.9642604793\C,4.5565543013,-0.5433027902,-1.6844134941\C,5.7576  
755236,-1.2960664647,-1.6862429515\C,3.7283074876,-0.6125217729,-2.826  
1177087\C,6.1149651224,-2.0905568668,-2.7861926006\H,6.4346061243,-1.2  
506109575,-0.8240550398\C,4.0850417163,-1.4062032632,-3.9291294301\H,2  
.7774286287,-0.0707414496,-2.8525773167\C,5.2787690865,-2.1439030187,-  
3.9143141948\H,7.049066267,-2.6634620535,-2.7657532877\H,3.4212911416,  
-1.4499935332,-4.800215873\H,5.5567368008,-2.761246709,-4.7761285722\



Version=ES64L-G09RevD.01\State=1-A\HF=-4013.9010145\RMSD=3.112e-09\RMS  
F=3.638e-06\Dipole=0.3825958,-2.8910045,5.2303008\Quadrupole=-12.75612  
47,21.2237153,-8.4675906,-10.3655183,-15.1365246,-13.5254313\PG=C01 [X  
(C71H56N1O4P1Si2)]\@

### TIPSY/3 Type II E

1\1\GINC-LOGIN\Opt\RTPSSTPSS\def2SVP\W06\C71H56N1O4P1Si2\JHIOE\24-Jun  
-2016\0\#p opt scrf=(smd,solvent=ch2cl2,read) tpsstps/def2svp/w06 de  
nsityfit empiricaldispersion=gd3\title\0,1P,-0.1891329169,-0.526869  
0095,-1.0601333774\O,-1.2283898773,0.6881827615,-1.5584535554\O,0.9482  
31936,0.4111261266,-0.194790092\O,0.4165585089,-1.1329984154,-2.288719  
9276\O,-0.8519526221,-1.332377534,0.0559301803\C,-0.9832981996,2.47933  
42037,-0.0121056404\C,-1.7721991917,1.455363806,-0.5405285822\C,-3.087  
5978836,1.1488549,-0.0888050119\C,-3.5868393675,1.9086983097,0.9671763  
347\H,-4.5892202822,1.7074960141,1.3654946943\C,-2.8203911643,2.932576  
3391,1.5953141213\C,-1.4904008256,3.2209734437,1.1151338189\C,-0.71156  
71899,4.1827963367,1.8281339665\H,0.3141045609,4.3843826659,1.50721718  
88\C,-1.2280480967,4.8439509507,2.9333322286\H,-0.6063368494,5.5693850  
408,3.4694738752\C,-2.5506063389,4.5828740062,3.3829413984\H,-2.946228  
8518,5.1150798362,4.2547719653\C,-3.3267642892,3.6417671151,2.72602435  
49\H,-4.3402309475,3.4124202329,3.074326066\C,0.3806694078,2.718812196  
, -0.5667938383\C,1.3234536905,1.6813051165,-0.5805271834\C,2.710886198  
5,1.9002535994,-0.8618551741\C,3.0915264572,3.1723088952,-1.2807057397  
\H,4.1462960511,3.3878441581,-1.4880625584\C,2.1491054239,4.2281681975  
, -1.4499630152\C,0.7736712676,4.0077375573,-1.077859899\C,-0.153331113  
5,5.0791537726,-1.2572161018\H,-1.2063718018,4.9221985439,-1.005274645  
3\C,0.2595960361,6.304499923,-1.7598316233\H,-0.4723132748,7.108218451  
6,-1.8966369952\C,1.6199988315,6.5257647244,-2.1055388293\H,1.93191873  
48,7.5000789938,-2.4970508816\C,2.5435693004,5.5036439722,-1.954327023  
4\H,3.5945775857,5.6554610307,-2.2257307198\C,2.1874742484,-5.29630878  
69,-1.1177695174\C,2.0639228237,-3.8924230218,-1.0446156478\H,2.321846  
8517,-3.2699704498,-1.9060020206\C,1.6137693937,-3.2710900947,0.118203  
3167\H,1.588005918,-2.1813549379,0.161657012\C,1.2585936483,-4.0325182  
3,1.2569442051\C,1.406608391,-5.4397696458,1.1994647043\H,1.137664605,  
-6.0585886745,2.0611976218\C,1.8520114829,-6.0544790569,0.0259814237\H  
,1.9370968378,-7.1464156949,-0.0072980075\C,0.7607627896,-3.3790981232  
,2.4757075352\C,1.0636265038,-3.9757229208,3.8163551258\H,1.1605755113  
, -3.193789109,4.5856831052\H,1.9930904922,-4.5602338452,3.7681399488\H  
,0.248136714,-4.6561444805,4.1238360223\N,0.0785956022,-2.2608273481,2  
.3362068748\H,-0.1625841274,-1.9237978313,1.3397871334\C,-0.4663470191  
, -1.3826413391,3.3181444923\C,-0.4498198569,-0.0103712648,2.9916258865  
\H,-0.0146537703,0.3095780633,2.0407536482\C,-0.9835364088,0.919297492  
1,3.889794235\H,-0.9546284625,1.9841269384,3.64108995\C,-1.5584284888,  
0.4893838341,5.096907991\C,-1.6051383603,-0.8799888039,5.3991225663\H,  
-2.0782340544,-1.2250564346,6.3243935534\C,-1.0637803388,-1.8238624293  
,4.5148224636\H,-1.1490361569,-2.888430913,4.7397827293\H,-1.983260787  
8,1.2209473125,-5.7921858579\C,2.7041108652,-5.9553021794,-2.3723123097  
\H,2.4132162618,-7.0179308349,-2.4229436044\H,2.3354705118,-5.43872958  
43,-3.275117474\H,3.810026204,-5.9081035282,-2.4011067262\Si,-4.208614  
8981,-0.2119344057,-0.8063037535\Si,4.0225667588,0.5877004561,-0.44375  
31304\C,-5.6566522132,0.6330018828,-1.7042416784\C,-6.5375182225,-0.15  
52203839,-2.4855137443\C,-5.9121289495,2.0209361083,-1.6255362747\C,-7  
.6344485217,0.4164822314,-3.1479273516\H,-6.3612810707,-1.2337826327,-  
2.5836541157\C,-7.005472323,2.599200666,-2.2911254917\H,-5.2457274082,  
2.6663904017,-1.0414618129\C,-7.8708798398,1.7977349417,-3.0515934242\H  
, -8.3025552863,-0.2152319221,-3.744531671\H,-7.1790566176,3.679032408  
7,-2.2180209174\H,-8.7240172628,2.2477806389,-3.5718369166\C,-4.848933  
7787,-1.1822581453,0.6933059474\C,-3.9246765511,-1.6501263974,1.660031  
4509\C,-6.2167578865,-1.4820365427,0.8807461973\C,-4.3545013344,-2.398  
9219377,2.7658608017\H,-2.8573830524,-1.429422007,1.5364755149\C,-6.65  
02814738,-2.2270661691,1.9900483498\H,-6.9580685776,-1.1278185362,0.15  
4363968\C,-5.7191429734,-2.6885716277,2.9334987912\H,-3.6234051493,-2.  
7532129789,3.500777755\H,-7.7167001397,-2.4460239096,2.118020904\H,-6.  
0556699301,-3.2705346475,3.7992096481\C,-3.4383095474,-1.4260693371,-2  
.0407658076\C,-3.1150261828,-2.7501740965,-1.6704330582\C,-3.202017692  
3,-1.0372917787,-3.3799274574\C,-2.5728419441,-3.6530181045,-2.5985486  
346\H,-3.2789051424,-3.0821053169,-0.6396618736\C,-2.6608848579,-1.934  
7975171,-4.3114352124\H,-3.4375722714,-0.0154657463,-3.700942249\C,-2.  
3455866467,-3.2475595735,-3.9222678138\H,-2.3222197048,-4.6730255995,-

2.2848295644\H,-2.4807590824,-1.6098277741,-5.3427259371\H,-1.91931777  
45,-3.9492212356,-4.6484224023\C,5.7019824502,1.4844600329,-0.40721057  
87\C,6.2391584478,2.0231524412,0.7844453418\C,6.4351382745,1.667371070  
8,-1.6040961325\C,7.459404684,2.7180764372,0.7829210919\H,5.7007735818  
,1.8953671467,1.7313569169\C,7.6530636959,2.3651315105,-1.6121532173\H  
,6.0501517611,1.2567408524,-2.5456869671\C,8.1677097815,2.892723508,-0  
.4167282395\H,7.858216623,3.1233719382,1.7199839575\H,8.2022611865,2.4  
956459497,-2.5517062828\H,9.1202905208,3.4347048436,-0.4196484454\C,4.  
1792475429,-0.7705963599,-1.7483965242\C,3.3482141878,-0.8128742493,-2  
.8886946875\C,5.2104397875,-1.736721158,-1.6392929443\C,3.5291452172,-  
1.793346911,-3.8786978132\H,2.5317464021,-0.0939290261,-2.9963581982\C  
,5.3878147124,-2.7228041114,-2.620757741\H,5.8951511258,-1.7136426696,  
-0.7825675598\C,4.5443299502,-2.752459907,-3.7445562963\H,2.8636460882  
,-1.8142172099,-4.7490133629\H,6.1863836145,-3.4656729905,-2.512833823  
9\H,4.678823303,-3.5234204258,-4.5117196918\C,3.6707993944,-0.05766820  
3,1.3052772608\C,3.140703622,0.8317025442,2.2709848726\C,3.9738546941,  
-1.3741757958,1.7192457548\C,2.9260997171,0.4258316673,3.596346963\H,2  
.8790887651,1.8572795145,1.9824489732\C,3.7575572759,-1.7862836503,3.0  
441795038\H,4.3744364887,-2.0984752967,1.0017807419\C,3.235019192,-0.8  
871414277,3.9868709542\H,2.5070884155,1.1311461149,4.3224187747\H,3.99  
42882847,-2.8146868186,3.3388171649\H,3.0626988989,-1.2087605336,5.020  
1190356\Version=ES64L-G09RevD.01\State=1-A\HF=-4013.9023547\RMSE=6.27  
6e-09\RMSF=6.769e-06\Dipole=1.1106583,-2.4837218,4.7392824\Quadrupole=  
-21.0435044,20.2781606,0.7653438,-13.4425063,-7.9398367,-14.0411311\PG  
=C01 [X(C71H56N1O4P1Si2)]\@

### TIPSY/3 Type I Z

1\1\GINC-WORKER1\FOpt\RTSPSS\def2SVP/W06\C71H56N1O4P1Si2\HIOE\24-J  
un-2016\0\#p tpsstps/def2svp/w06 densityfit empiricaldispersion=gd3  
opt scf=cddis scrf=(smd,solvent=ch2cl2,read)\title\0,1\P,0.514945296  
5,-0.6145344795,-1.5767772125\O,1.5822910318,-1.7331571741,-0.92350467  
43\O,-0.7901656219,-0.8618866082,-0.4993461655\O,0.2397198551,-1.06732  
5956,-2.9733118924\O,0.9740841685,0.7934828731,-1.1930721434\C,0.89846  
62348,-2.2632784671,1.280204436\C,1.8352422473,-1.6675765336,0.4296953  
644\C,3.0266203863,-1.0208902528,0.8821263528\C,3.2460668817,-1.002977  
5137,2.2585683424\H,4.1507389509,-0.5361518333,2.6666154308\C,2.303101  
0739,-1.5315982437,3.1883873959\C,1.0948993402,-2.1529687554,2.7017937  
736\C,0.1214766787,-2.5775941081,3.6563798925\H,-0.8168866735,-3.01459  
23949,3.3028311609\C,0.3434474783,-2.4285880355,5.0174961376\H,-0.4223  
030805,-2.7539569607,5.7304005397\C,1.551495037,-1.8527341683,5.496321  
0248\H,1.7160353551,-1.747809367,6.5741780865\C,2.5082030252,-1.411031  
3646,4.5965316952\H,3.435796276,-0.9470431677,4.951041811\C,-0.3141868  
566,-2.899525192,0.6883460224\C,-1.1516740823,-2.146974495,-0.14470758  
45\C,-2.4349519698,-2.6022667421,-0.5831993366\C,-2.791370946,-3.91267  
54177,-0.2836920427\H,-3.7650305597,-4.3067187402,-0.5974480122\C,-1.9  
205675335,-4.7828676896,0.438373917\C,-0.6711571434,-4.2717892462,0.94  
78279374\C,0.1834251656,-5.1657871624,1.661149976\H,1.1474795654,-4.80  
1945476,2.0287796745\C,-0.1836718025,-6.4861103971,1.877396732\H,0.49  
30213165,-7.1550221227,2.4206674037\C,-1.4241896204,-6.9817103364,1.39  
35883003\H,-1.7025550487,-8.0256543727,1.5744225166\C,-2.2714794457,-6  
.1440023104,0.6851593114\H,-3.2268671446,-6.5152773484,0.2967743966\C,  
-1.966134934,5.62877642,4.0367631513\C,-2.3083111254,4.2871267738,4.29  
99751843\H,-2.9307240563,4.0489552994,5.1695278855\C,-1.8590691894,3.2  
499598807,3.4759862901\H,-2.1400691079,2.2209254861,3.7133873412\C,-1.  
0826842812,3.5276190536,2.3281163304\C,-0.7241954392,4.8747123025,2.06  
6742384\H,-0.0821749693,5.1176445471,1.2161023366\C,-1.1516313708,5.89  
71559586,2.9124251168\H,-0.8462413675,6.9281767694,2.7018591015\C,-0.5  
85140964,2.4215140792,1.4922027145\C,-0.2481776943,1.1085670192,2.1302  
096686\H,0.2864717802,0.4548135466,1.4286367071\H,-1.1874098208,0.5991  
240384,2.4138123157\H,0.3373364856,1.2604144783,3.050492677\N,-0.37824  
99025,2.5226164379,0.1999132938\H,0.1622219259,1.7190796187,-0.3015655  
788\C,-0.7633100436,3.5582157831,-0.7047187727\C,-2.0680796285,4.08464  
99347,-0.7031764304\H,-2.8035190029,3.7235502353,0.0210472159\C,-2.412  
4621396,5.0541159489,-1.6521930531\C,-1.4674659112,5.4938023703,-2.595  
5301217\C,-0.1754070767,4.944915359,-2.6014321126\H,0.5596952768,5.271  
6732481,-3.3442026611\C,0.1807985783,3.9664260136,-1.6635077375\H,1.17  
68137516,3.5154214784,-1.6654983465\H,-1.7445885692,6.252172811,-3.335  
2300245\Si,-3.6440406632,-1.3178224655,-1.2964264794\Si,4.2267372401,-  
0.069300406,-0.2612013181\C,6.0038508833,-0.450605473,0.3209736398\C,6

.8120948761,-1.4394152393,-0.2859476941\C,6.5528493945,0.2631152849,1.4145795932\C,8.1055789792,-1.7152652736,0.1854187778\H,6.4355487828,-2.0016034714,-1.1475967586\C,7.8437463288,-0.0113910832,1.8932749958\H,5.9658769961,1.0544556988,1.8973873191\C,8.6236810181,-1.0042215654,1.2793177101\H,8.7113963393,-2.485222051,-0.3061346861\H,8.2435355441,0.5554458228,2.7420294265\H,9.633593731,-1.2180029668,1.6473913839\C,3.9805904368,1.7899947719,0.0247033758\C,3.0120444357,2.2823147349,0.9250238824\C,4.8052579361,2.7320188712,-0.6361920038\C,2.8613078066,3.6584509001,1.155734807\H,2.3665663381,1.5761078633,1.4543920276\C,4.6495392735,4.1107733094,-0.4221867723\H,5.5838920469,2.3882648087,-1.3285585944\C,3.6747000568,4.5777970004,0.4753588768\H,2.1036665196,4.0122963461,1.8634670444\H,5.2938062555,4.8216999468,-0.9521616546\H,3.5536051898,5.6535205552,0.6464271649\C,4.04649583,-0.5246654375,-2.0894131932\C,3.7892151239,0.455401432,-3.0732995843\C,4.1332930224,-1.8736694916,-2.5099848768\C,3.6349008657,0.1069204593,-4.4250262717\H,3.6846647551,1.5063723782,-2.7831740777\C,3.9824832084,-2.2267776072,-3.8578406805\H,4.2920161482,-2.6687547171,-1.771930546\C,3.7330191865,-1.2351030188,-4.8209594851\H,3.4250608746,0.8853179714,-5.1675467925\H,4.0462591201,-3.2793949598,-4.1565452529\H,3.6051810026,-1.510261663,-5.8740858491\C,-2.9645640242,-0.3991918025,-2.8000754069\C,-2.7649657215,-1.0588620282,-4.0344126093\C,-2.5854144369,0.95890305,-2.7106979694\C,-2.2401465405,-0.3794704883,-5.1433921\H,-3.0036848425,-2.1247720326,-4.132178778\C,-2.0517042618,1.6414108347,-3.8133205076\H,-2.6884573783,1.4934363691,-1.7610101892\C,-1.8864089693,0.9745086005,-5.0368074481\H,-2.0933265303,-0.912992331,-6.0896513008\H,-1.7592013401,2.6922584963,-3.7102185834\H,-1.4703245973,1.5047493214,-5.9012401819\C,-4.0487525272,-0.1129979554,0.1188343992\C,-3.7109159909,-0.4039689435,1.4603766413\C,-4.8008835961,1.0602196684,-0.1303475973\C,-4.101257132,0.4434167686,2.510409235\H,-3.1363032747,-1.3078896003,1.6945237643\C,-5.1769223891,1.9205444483,0.9129085995\H,-5.1013881036,1.3094593739,-1.1552559257\C,-4.8276353811,1.6132383696,2.2380227411\H,-3.8309007431,0.1919500271,3.5423311112\H,-5.7479493779,2.8294901273,0.6918282444\H,-5.121238249,2.2818890648,3.0547147764\C,-5.2843355389,-2.1965963976,-1.6956295659\C,-6.0192077126,-2.7628859165,-0.6240444545\C,-5.8376756152,-2.2934250083,-2.9923934538\C,-7.2408993271,-3.4169230607,-0.8403539205\H,-5.6331075451,-2.6863014017,0.4003928413\C,-7.0630718271,-2.9435555635,-3.2143563561\H,-5.313892359,-1.8498308349,-3.8460860807\C,-7.7647941933,-3.5120117803,-2.1403637097\H,-7.7878899224,-3.8487480407,0.0056669723\H,-7.4710080355,-3.0041685471,-4.2299130074\H,-8.7202363039,-4.0201920698,-2.3132273622\H,-3.4293845203,5.4601228906,-1.660980174\C,-2.4443894923,6.7529744862,4.9211327001\H,-1.5961038617,7.3709323858,5.2674877207\H,-3.1217212103,7.4253667157,4.3617630138\H,-2.9862860805,6.374566069,5.8030671348\\Version=ES64L-G09RevD.01\State=1-A\HF=-4013.895668\RMDS=1.811e-09\RMSF=3.703e-06\Dipole=-2.130817,4.8723285,4.7141157\Quadrupole=-19.1370244,23.7480973,-4.6110729,-6.198381,-4.5144635,6.7116282\PG=C01[X(C71H56N1O4P1Si2)]\@

### TIPSY/3 Type II Z

1\1\GINC-LOGINFOpt\RTPSSTPSS\def2SVP/W06\C71H56N1O4P1Si2\HIOE\15-Nov-2015\0\#p tpsstps\def2svp/w06 densityfit empiricaldispersion=gd3 op t scrf=(smd,solvent=ch2cl2,read)\title\0,1\P,-0.6840372126,0.2379397124,-1.6895393554\O,-1.8293536891,1.396870317,-1.315750309\O,0.5093847539,0.6463432092,-0.5322715986\O,-0.2474112382,0.4879798716,-3.0996083861\O,-1.185145584,-1.1149624152,-1.1795374106\C,-1.4039904681,2.1894329865,0.870106663\C,-2.2297493717,1.4683245074,0.0060060714\C,-3.4377897496,0.8231485716,0.4077376851\C,-3.794499225,0.9450145683,1.7497291037\H,-4.7185543446,0.4827546101,2.1177195012\C,-2.9747818975,1.6207007959,2.7003310155\C,-1.74420573,2.2381755053,2.2683515775\C,-0.8920793331,2.8141628573,3.2591706442\H,0.065541832,3.2462692325,2.9556854666\C,-1.2521589775,2.8110398076,4.598949355\H,-0.5774700885,3.2499892731,5.3421154021\C,-2.4820170478,2.2351059323,5.018338763\H,-2.7545128137,2.2434984155,6.0792059887\C,-3.3220580694,1.6490545625,4.0850606711\H,-4.2624200508,1.180540243,4.3970219215\C,-0.1460716988,2.7914617757,0.3419461006\C,0.8134027458,1.9690794087,-0.266980781\C,2.1533479723,2.4066837395,-0.5186531054\C,2.4303348768,3.7597050826,-0.3343062649\H,3.441474794,4.1415628612,-0.5149838129\C,1.4419352576,4.6867063187,0.1070646074\C,0.1387791376,4.1966966401,0.478054996\C,-0.8310613869,5.137057859,0.9405685188\H,-1.8333220125,4.7848255129,1.2030403986\C,-0.5238325978,6.486281943,1.0415570086\H,-1.2866655353,7.191261587,1.390044675

3\C,0.7674411467,6.9647712158,0.6906709356\H,0.9964937583,8.032242434,  
0.7797726611\C,1.7289247413,6.0790483133,0.2299626576\H,2.7277128967,6  
.4335706822,-0.0494816951\C,4.8016002332,-5.2241783858,0.9894551734\C,  
4.4023632494,-3.959291679,1.4787222523\H,5.0457734314,-3.4276558475,2.  
1871124902\C,3.2094385163,-3.3649425028,1.0706023337\H,2.946223498,-2.  
3735153037,1.4500587875\C,2.3692944433,-4.0182494869,0.1344839704\C,2.  
7769887039,-5.2695117438,-0.3812090088\H,2.1505170029,-5.7923208966,-1  
.109834128\C,3.9648592491,-5.8659465646,0.054540949\H,4.2506725921,-6.  
8460004158,-0.342864858\C,1.160630362,-3.3610262595,-0.3887039925\C,0.  
8305537849,-3.5054278807,-1.8428835898\H,-0.0314300407,-2.8824250117,-  
2.1206257955\H,0.5937886639,-4.5656057892,-2.0507769806\H,1.7077133721  
,-3.2401819129,-2.4563349109\N,0.356492249,-2.6065435172,0.3290737331\  
H,-0.337949739,-2.011762699,-0.2506547255\C,0.2419786542,-2.4287125035  
,1.738926465\C,-0.2437832381,-1.1862020678,2.1893632351\H,-0.445080292  
, -0.3911789791,1.4664648813\C,-0.4644610401,-0.9831316797,3.5576071766  
\H,-0.8382583111,-0.014183965,3.9015827998\C,-0.2084624774,-2.01255081  
91,4.4754232705\C,0.2603551955,-3.2559165443,4.0170923624\H,0.44238368  
29,-4.0706746303,4.7256882201\C,0.4800647255,-3.4746126369,2.652315730  
6\H,0.8128415864,-4.4535386297,2.2987370128\H,-0.3832210499,-1.8516977  
391,5.544340778\C,6.0924091692,-5.8500652818,1.454942884\H,6.08439601,  
-5.9942730989,2.5513007601\H,6.2666523046,-6.8278542488,0.9769780393\H  
,6.9506896091,-5.1916190128,1.2260104024\Si,3.613124927,1.1958703199,-  
0.6805204442\Si,-4.5029656948,-0.2895152687,-0.7179036957\C,-6.3265063  
437,0.1429552104,-0.3569730257\C,-7.0467306171,1.10267903,-1.105987050  
5\C,-6.9980760849,-0.4814263635,0.7224992272\C,-8.3740611404,1.4313034  
16,-0.7879951386\H,-6.5732297901,1.6026108932,-1.9582274342\C,-8.32431  
97143,-0.1546471019,1.0471931781\H,-6.4798336152,-1.2424748012,1.31864  
22323\C,-9.0163729878,0.8051084355,0.2919542655\H,-8.9088540033,2.1771  
225074,-1.3873772226\H,-8.819140902,-0.6538692477,1.8882683273\H,-10.0  
526559673,1.0606046207,0.5407961021\C,-4.2746281358,-2.0939072586,-0.1  
841911415\C,-3.2980296764,-2.4886958124,0.7551404601\C,-5.112941982,-3  
.0971268533,-0.7276646635\C,-3.1524210058,-3.832685692,1.1333348088\H,  
-2.6360465443,-1.7369637433,1.1946690114\C,-4.9680949085,-4.4438460666  
, -0.3592055722\H,-5.893487524,-2.8258769403,-1.4496964133\C,-3.9850046  
087,-4.8146636489,0.5730314646\H,-2.385984736,-4.1112029591,1.86548878  
53\H,-5.6253990469,-5.2039389338,-0.7969740774\H,-3.8721069238,-5.8652  
051679,0.8645756604\C,-4.1414948402,-0.078413037,-2.5646529869\C,-3.79  
18300026,-1.1867376228,-3.3675621379\C,-4.1750443967,1.1960082942,-3.1  
800828283\C,-3.4949505468,-1.033124458,-4.7313403895\H,-3.7297730581,-  
2.1853409323,-2.9217697225\C,-3.8816153994,1.3546991283,-4.5415681725\  
H,-4.402591106,2.0871484405,-2.5836515593\C,-3.5394904562,0.2380761744  
, -5.3223079583\H,-3.2181588622,-1.9085292077,-5.3300414894\H,-3.905766  
2468,2.3534865687,-4.9921469452\H,-3.2999948186,0.3615177906,-6.384634  
9889\C,3.8940278293,0.4417147213,1.0413295607\C,5.1634433963,-0.085664  
0256,1.3840393692\C,2.8771304698,0.3924334343,2.0223698247\C,5.4041904  
183,-0.6441350859,2.6488529473\H,5.9837058512,-0.0512973422,0.65685354  
66\C,3.1118309316,-0.1689257077,3.2878047093\H,1.8823171823,0.79448703  
19,1.8040489487\C,4.3757430306,-0.6902910222,3.6039788924\H,6.39588913  
01,-1.044301703,2.8884949791\H,2.3029214593,-0.2007353254,4.025579183\  
H,4.55952857,-1.1293927548,4.5909892835\C,5.1577872141,2.2191046177,-1  
.1117044555\C,5.8724945322,2.9252617823,-0.1143266633\C,5.6093611643,2  
.3261573143,-2.4473341203\C,6.9915461288,3.7081220705,-0.4381918891\H,  
5.5524595964,2.8613642297,0.9328346939\C,6.7275593513,3.1087448162,-2.  
7769961724\H,5.0830768049,1.7866039694,-3.2442719826\C,7.4209980077,3.  
8018392609,-1.7720895354\H,7.530074122,4.244682983,0.3513769752\H,7.05  
93608355,3.1749759074,-3.8194976203\H,8.2959484932,4.4107643446,-2.026  
7131137\C,3.4685110277,-0.1506844397,-1.9972784147\C,2.7655562158,0.07  
67252442,-3.2009073321\C,4.1866797312,-1.3630119042,-1.8627252658\C,2.  
7884611766,-0.8674259276,-4.2397134127\H,2.1700145589,0.9861998758,-3.  
3230701049\C,4.215120703,-2.3072162065,-2.9001534222\H,4.7330935934,-1  
.5783866983,-0.9373450115\C,3.5182526057,-2.0577183404,-4.0949794753\H  
,2.2232474819,-0.6761363277,-5.1586631457\H,4.771800681,-3.2423555687,  
-2.7707686096\H,3.5344655742,-2.7959241405,-4.90490402\Version=ES64L-  
G09RevD.01\State=1-\HF=-4013.8978555\IRMSD=5.738e-09\RMSF=2.581e-06\Di  
pole=3.2033535,-4.1558529,3.7850879\Quadrupole=-5.1182624,20.356616,-1  
5.2383536,-20.4253324,-2.7646059,1.1562968\PG=C01 [X(C71H56N1O4P1Si2)]  
\@

TIPSY/5 Type I E

1\1\GINC-WORKER\FOpt\RTPSSTPSS\def2SVP\W06\C71H56N1O5P1Si2JHIOE\15-No  
v-2015\0\#p tpsstps\def2svp/w06 densityfit empiricdispersion=gd3 o  
pt scrf=(smd,solvent=ch2cl2,read)\title\0,1P,0.0691037864,-0.423930  
5283,1.3706468419\O,1.217979825,0.7400363264,1.7258080735\O,-0.9493271  
27,0.4697437952,0.3417655123\O,-0.5940974496,-0.7950969853,2.662272517  
7\O,0.6952120905,-1.4414241232,0.4211611803\C,1.0629280506,2.454811025  
1,0.0880817906\C,1.7975807121,1.4171925812,0.6680458549\C,3.1147542303  
,1.0478177197,0.2577987368\C,3.6866553392,1.7928982768,-0.7724759673\H  
,4.7039574975,1.5673363563,-1.1138279881\C,2.9838335902,2.840389775,-1  
.4367402358\C,1.6358774308,3.1576446395,-1.0332185684\C,0.9203024038,4  
.1362863275,-1.7879077192\H,-0.1205911859,4.3526636207,-1.5316938637\C  
,1.5223208609,4.8070707455,-2.8427411632\H,0.9502393264,5.5506169052,-  
3.4084844261\C,2.8698954683,4.5344564972,-3.2010663765\H,3.3350019309,  
5.0775415922,-4.0306726743\C,3.579521869,3.560870592,-2.516236844\H,4.  
6097685479,3.3177767383,-2.8001984326\C,-0.304064923,2.7719763474,0.59  
4163025\C,-1.2912378608,1.7766148055,0.6263504158\C,-2.6780148922,2.06  
37080027,0.8393312033\C,-3.018728605,3.3707971556,1.1777812008\H,-4.06  
99209713,3.64116779,1.3310836687\C,-2.037718,4.3926504447,1.3377695428  
\C,-0.6596575075,4.0981416077,1.0344147548\C,0.3065368366,5.1339621625  
,1.2143772887\H,1.3615390384,4.91840757,1.0209704882\C,-0.0714084432,6  
.3957240503,1.6499118264\H,0.6898819656,7.1709166563,1.7912327073\C,-1  
.4343312198,6.6911013887,1.9224290749\H,-1.7185594739,7.6934117071,2.2  
607967765\C,-2.3958458864,5.7045746971,1.7706401877\H,-3.4495936787,5.  
9130716046,1.9886140306\C,0.7017079691,-0.1741440852,-4.8758953379\C,0  
.4322635349,-1.4564087562,-5.4141859643\H,0.566785771,-1.6135237742,-6  
.4884198705\C,0.0007368798,-2.4850507901,-4.587303213\H,-0.1958407359,  
-3.4631905291,-5.033891902\C,-0.1583617526,-2.2857024841,-3.1883019551  
\C,0.1178199055,-0.9961695842,-2.6678284644\H,-0.0141268403,-0.7865555  
251,-1.6044511518\C,0.5383350352,0.0465641643,-3.4881419826\H,0.719582  
3098,1.0287405079,-3.046356294\C,-0.6086938378,-3.3831510703,-2.336832  
0903\C,-1.2264140809,-4.6083444732,-2.9462157341\H,-1.8795446465,-5.12  
4247704,-2.2265256189\H,-0.433712389,-5.314141543,-3.2551551479\H,-1.8  
094328796,-4.3437372617,-3.8400709086\N,-0.476205346,-3.2891463769,-1.  
0271629337\H,-0.016648318,-2.4323757287,-0.5720959622\C,-0.8576169831,  
-4.2385528076,-0.028062563\C,-1.6236667132,-3.7673408871,1.0554427376\  
H,-1.9545558719,-2.7262259968,1.0827702184\C,-1.9593384813,-4.64578304  
3,2.0932242773\H,-2.5600219805,-4.278173592,2.9315978786\C,-1.52442543  
92,-5.9807794188,2.060055254\C,-0.7446370445,-6.4375129261,0.985515983  
6\H,-0.3878330591,-7.4726912447,0.9641438218\C,-0.4021291829,-5.569161  
9559,-0.0604768926\H,0.2354040423,-5.9090340022,-0.8812837551\H,-1.784  
6695176,-6.6628249697,2.8764778734\Si,4.0673438306,-0.4507770622,0.952  
8903902\C,3.7882362006,-1.9413159098,-0.1854626209\C,3.3833323915,-1.7  
633593248,-1.5271297463\C,3.9977374169,-3.2633856067,0.27099437\C,3.18  
60114612,-2.8596360116,-2.379633261\H,3.1983492464,-0.75391538,-1.9113  
940839\C,3.7882093411,-4.365946088,-0.5735571065\H,4.3155373946,-3.441  
2674759,1.3052167656\C,3.3793676104,-4.1659969635,-1.9018890361\H,2.86  
44384788,-2.693048465,-3.4136305652\H,3.9430577706,-5.3820417422,-0.19  
27748981\H,3.2109892044,-5.0247104635,-2.562131282\C,5.9112601449,0.01  
92807262,0.8935990578\C,6.8911185555,-0.9342969858,0.5330960329\C,6.35  
41709837,1.3135634489,1.259226338\C,8.2578629877,-0.6119519549,0.53713  
10018\H,6.5832859119,-1.9454972142,0.2398704398\C,7.719065909,1.641276  
2219,1.2648010367\H,5.6220882466,2.0814328717,1.5381252215\C,8.6746792  
875,0.677508727,0.9034273281\H,8.998181335,-1.3679529009,0.2511033897\  
H,8.0373638344,2.6507050338,1.5497304039\H,9.7406035829,0.9322819497,0  
.9045976332\C,3.6516168092,-0.9102148654,2.7466772605\C,4.3433685384,-  
0.3072333704,3.8229299667\C,2.6476860387,-1.8575847102,3.0561817061\C,  
4.0340585051,-0.624423933,5.1554311945\H,5.1382121262,0.4216628079,3.6  
243023608\C,2.3358885152,-2.1780274438,4.3852018175\H,2.0822105384,-2.  
3295481862,2.2462225375\C,3.0273947112,-1.5609683593,5.4397990311\H,4.  
5812468854,-0.1402268022,5.9725638606\H,1.5404712373,-2.9022889435,4.5  
947532587\H,2.7830444573,-1.8079717991,6.4794025351\Si,-4.0346515581,0  
.7840512486,0.4528714124\C,-3.6515692109,-0.0314645899,-1.2152344082\C  
, -3.913736659,-1.3949893336,-1.4773561319\C,-3.1728447298,0.765472801,  
-2.283060232\C,-3.7362758553,-1.9346659088,-2.761555186\H,-4.262723263  
6,-2.0513639645,-0.6721107746\C,-2.9969310337,0.2310519913,-3.56876100  
27\H,-2.9326701809,1.82212937,-2.1093506691\C,-3.2885569027,-1.1202327  
197,-3.8133108412\H,-3.9471021403,-2.9951571813,-2.9387174678\H,-2.624  
2414783,0.8676014667,-4.3790439227\H,-3.1492621412,-1.5399939816,-4.81  
54938514\C,-5.6581767972,1.7652616809,0.2672179152\C,-6.1156070846,2.2

432253349,-0.9821494034\C,-6.4276320023,2.0773523959,1.4140393125\C,-7.2886190378,3.008398113,-1.0837820942\H,-5.5521396879,2.0133150278,-1.8942842579\C,-7.5993760132,2.8444017073,1.3187548633\H,-6.1064105553,1.7165969112,2.3989864639\C,-8.0327284219,3.3119193487,0.0674738991\H,-7.6240165908,3.3652571496,-2.0643784202\H,-8.176457266,3.0750704436,2.2215974678\H,-8.9488122822,3.9085102158,-0.0099853562\C,-4.3394036676,-0.4748902086,1.8287431087\C,-5.4391571954,-1.3643365856,1.7309596815\C,-3.546232157,-0.5249194243,2.9942857539\C,-5.7207332593,-2.2835644296,2.7521093733\H,-6.0921353826,-1.3336583812,0.8497495875\C,-3.827820614,-1.4415810911,4.0208643768\H,-2.6786631083,0.1321329405,3.0926978441\C,-4.9121277102,-2.3237483933,3.9013029481\H,-6.5731684295,-2.9656467982,2.6552919833\H,-3.1904356077,-1.470040179,4.911882587\H,-5.1300033613,-3.0404283441,4.7014408675\O,1.0925847846,0.7678787757,-5.7558858636\C,1.4029615556,2.0854051842,-5.2673487033\H,1.7143893425,2.6643827555,-6.1485764659\H,0.5150332467,2.5544785182,-4.8081691682\H,2.2281300438,2.0477442998,-4.5362663062\Version=ES64L-G09RevD.01\State=1-A\HF=-4089.069138\RMSD=6.986e-09\RMSF=2.735e-06\Dipole=-0.5109158,-1.8138113,-5.1172974\Quadrupole=-22.1419846,28.5366073,-6.3946227,11.8923211,-6.6910827,5.0032927\PG=C01 [X(C71H56N1O5P1Si2)]\@

### TiPSY/5 Type II E

1\1\GINC-LOGIN\Opt\RTPSSTPSS\def2SVP/W06\C71H56N1O5P1Si2\JHIOE\04-Dec-2016\0\#p tpsstps\def2svp/w06 densityfit empiricaldispersion=gd3 op t scrf=(smd.solvent=ch2cl2,read)\title\0,1\P,-0.1726564942,-0.4892750709,-0.9294442834\O,-1.0986488712,0.7360150376,-1.5976432549\O,0.9931554058,0.4494906259,-0.109940237\O,0.4408484189,-1.2614915936,-2.0573399651\O,-0.9457201268,-1.1224182895,0.2252805027\C,-0.7967959764,2.6435430317,-0.2109906128\C,-1.6304513755,1.6235689272,-0.6745921556\C,-2.972654597,1.4287357514,-0.2391530682\C,-3.4572289381,2.3106077872,0.7249487135\H,-4.4793381978,2.1999507633,1.1082510208\C,-2.6524840225,3.347182105,1.2810075288\C,-1.294471088,3.5163403694,0.8231123901\C,-0.4843181877,4.4988348428,1.4702226093\H,0.5598320747,4.6145171422,1.167464753\C,-0.9952412942,-5.290140447,2.4888630664\H,-0.3499957911,6.0300931797,2.9749928501\C,-2.3428920667,5.143639746,2.9151615267\H,-2.73341493,5.7775183961,3.7185771675\C,-3.1507748108,4.1866095768,2.322960257\H,-4.1855735465,4.0463383143,2.6555952267\C,0.6025761757,2.7428805532,-0.7191946367\C,1.4718362838,1.6495897042,-0.591118965\C,2.8804505436,1.7446308784,-0.8316229341\C,3.368837252,2.9496755677,-1.3295947756\H,4.4432050299,3.0732570546,-1.509023582\C,2.5139115493,4.0513786747,-1.6236764013\C,1.109365204,3.9536199538,-1.3141212435\C,0.2704254978,5.0648038436,-1.6324332615\H,-0.8030240566,4.9965862391,-1.4321629978\C,0.7946008239,6.2156006064,-2.2026410676\H,0.1292780081,7.05158651,-2.4453480471\C,2.1841568827,6.3191979778,-2.4820165555\H,2.5846035572,7.2363522073,-2.9273727513\C,3.0238700312,5.253516252,-2.1997226054\H,4.095856279,5.3130011179,-2.4204288665\C,1.0669643804,-5.4937507157,-0.6894676936\C,0.6008765268,-6.1265825637,0.4905559372\H,0.4056514757,-7.203020297,0.4662678182\C,0.3790227302,-5.3842489695,1.6443183793\H,-0.0064845365,-5.8881006991,2.5361716191\C,0.583798871,-3.977500978,1.6500587052\C,1.0954256975,-3.3726227331,0.4769321657\H,1.3497224643,-2.3117099724,0.4826811337\C,1.344414034,-4.108700261,-0.6781703541\H,1.7270316923,-3.588619011,-1.5581475817\C,0.2454118155,-3.1790708164,2.8288503911\C,0.4307418709,-3.7528671392,4.2010388169\H,0.7553046773,-2.9729000186,4.9083654204\H,1.1821607991,-4.5546902948,4.1770440692\H,-0.5180278799,-4.1785378875,4.5764920872\N,-0.2105470152,-1.9555802353,2.623229936\H,-0.3804516861,-1.6591844726,1.6040476864\C,-0.6019620851,-0.9292272733,3.527624605\C,-0.4714472767,0.3917854838,3.0451559698\H,-0.055937387,0.5585283886,2.0474921701\C,-0.8716723083,1.4672029002,3.8440632681\H,-0.7628375358,2.4877137246,3.4643984978\C,-1.4175826081,1.2394656459,5.1177386858\C,-1.5707445056,-0.0751105791,5.5831582706\H,-2.0209208,-0.2636263563,6.5634675243\C,-1.1716876601,-1.1642648964,4.7954645696\H,-1.3486072932,-2.1778288291,5.1560442464\H,-1.7363093469,2.0838918452,5.7377896152\Si,-4.1431630807,0.0510805855,-0.8412173115\Si,4.080746717,0.3543306812,-0.3332414825\C,-5.5332561465,0.8626090006,-1.8539959247\C,-6.465599692,0.0347808356,-2.5275018043\C,-5.6910697226,2.2618765817,-1.9738137269\C,-7.5186104355,0.581566502,-3.2762091782\H,-6.3648636301,-1.0565135325,-2.471760964\C,-6.7394067079,2.8147103651,-2.7281318523\H,-4.9825452882,2.9353913407,-1.4773924591\C,-7.6576069583,1.9757023008,-3.3780866224\H,-8.2286364965,-0.0803320001,-3.7852941726\H,-6.8367265375,3.9034242701,-2.8098410637\H,-8.4761589596,2.40562

12096,-3.9665479845\C,-4.8582093467,-0.7225782453,0.7377952592\C,-3.98  
15625091,-1.0938478313,1.7868864166\C,-6.2415818363,-0.9463458847,0.91  
8178276\C,-4.4716313008,-1.6728113209,2.9671385845\H,-2.9043423252,-0.  
9273464348,1.6712021412\C,-6.7355951961,-1.5219198208,2.1006181554\H,-  
6.9487167082,-0.6613001485,0.1299995812\C,-5.8509329318,-1.8872481147,  
3.1273278394\H,-3.7751957386,-1.9512700021,3.7659200284\H,-7.813350147  
9,-1.6817373423,2.2209729441\H,-6.2352110407,-2.3342833094,4.051346853  
4\C,-3.4195992734,-1.312238867,-1.943250653\C,-3.1303865473,-2.6027205  
7,-1.4472314495\C,-3.1918126831,-1.0637471399,-3.3170026841\C,-2.62632  
68085,-3.6071875929,-2.2888339986\H,-3.2891632787,-2.8256476773,-0.386  
8745955\C,-2.6900741229,-2.0635452066,-4.16298653\H,-3.4058242762,-0.0  
720672828,-3.7337989794\C,-2.4057077349,-3.3397206279,-3.6490507817\H,  
-2.3982460512,-4.5985424375,-1.8800440134\H,-2.5167693634,-1.846237335  
4,-5.2232464526\H,-2.0094901433,-4.1223219729,-4.306546805\C,5.8153829  
695,1.1370260846,-0.2510068101\C,6.3493118334,1.6550083174,0.951261457  
2\C,6.5980100342,1.2537350376,-1.4249062478\C,7.6121958772,2.268312778  
8,0.9817449269\H,5.7746468069,1.5763898373,1.8820759301\C,7.8594221599  
,1.8690218504,-1.4008784145\H,6.216414348,0.8581014723,-2.3742319488\C  
,8.3697601668,-2.3773235201,-0.1953382379\H,8.006648103,2.6590844907,1.  
9267711672\H,8.4459999746,1.9496126534,-2.3232838509\H,9.3560349196,2.  
8547398458,-0.1733205882\C,4.1860777806,-1.0336740325,-1.6128065326\C,  
3.3350572763,-1.0867292462,-2.7375153459\C,5.1884166168,-2.027937959,-  
1.4878622125\C,3.4694337054,-2.102456958,-3.6982331804\H,2.5410390277,  
-0.3452160352,-2.8568552242\C,5.3247482681,-3.0450805525,-2.443980495\  
H,5.8835816891,-2.0005321983,-0.6394638694\C,4.4632299946,-3.082406514  
8,-3.5540099622\H,2.7898738377,-2.1300415792,-4.5575139869\H,6.1058912  
149,-3.8050555634,-2.3281065079\H,4.5699792519,-3.8728628357,-4.305520  
5227\C,3.6368376894,-0.2620494753,1.4037464802\C,3.1699316976,0.662527  
6552,2.3684917214\C,3.8176388981,-1.6033558246,1.8089402581\C,2.907606  
2981,0.2672946741,3.6885075389\H,2.9963917758,1.707530886,2.0826437738  
\C,3.5490859525,-2.0057372617,3.1276495784\H,4.163240732,-2.3531543823  
,1.0886702417\C,3.0998417889,-1.0699401231,4.0721259475\H,2.5411711468  
,1.0000988976,4.4157568213\H,3.6880593442,-3.053993365,3.4155014819\H,  
2.8908693131,-1.3815581253,5.1016238222\O,1.2217735946,-6.2901383992,-  
1.7679162095\C,1.6638289219,-5.702315684,-3.0037903564\H,1.6629413926,  
-6.5209460119,-3.7382746668\H,0.9730854741,-4.9050151729,-3.3333192879  
\H,2.6848703533,-5.2940258958,-2.9022965822\Version=ES64L-G09RevD.01\  
State=1-A\HF=-4089.0680591\RMSD=3.345e-09\RMSF=2.411e-06\Dipole=0.6485  
731,-1.9273802,4.1856924\Quadrupole=-22.1295731,11.9091278,10.2204453,  
-6.7870663,-10.3450557,-9.1770629\PG=C01 [X(C71H56N1O5P1Si2)]\@

### TIPSY/5 Type I Z

1\1\GINC-LOGIN\Opt\RTPSSTPSS\def2SVP\W06\C71H56N1O5P1Si2\JHIOE\20-Nov  
-2015\0\#p tpsstps\def2svp\w06 densityfit empiricaldispersion=gd3 op  
t scrf=(smd,solvent=ch2cl2,read)\title\0,1\P,0.870657779,-0.79238892  
33,-1.5511980343\O,1.9172581727,-1.8144171179,-0.7339306444\O,-0.45267  
11212,-0.840349303,0.4687160761\O,0.5827031506,-1.4405123161,-2.86977  
69049\O,1.3695643664,0.644493578,-1.3964620861\C,1.2002892979,-1.98322  
70777,1.5140473762\C,2.1515706692,-1.5298134434,0.5970956422\C,3.32924  
472,-0.8051692893,0.9584009776\C,3.51426874,-0.5499903945,2.3159128441  
\H,4.404544191,-0.0089253294,2.6583729885\C,2.5578621501,-0.9312507762  
,3.3021412947\C,1.3693131186,-1.6463995789,2.903840906\C,0.3842197629,  
-1.925532777,3.8994844445\H,-0.5403764464,-2.4329161495,3.6101690371\C  
,0.5765913314,-1.5476864811,5.2203698573\H,-0.1973620629,-1.7662723594  
,5.9643655808\C,1.763628098,-0.8741868297,5.6172159442\H,1.9037429887,  
-0.5871335604,6.6650267916\C,2.7318237206,-0.5720852358,4.6734628979\H  
,3.6441708036,-0.037007175,4.9610349159\C,-0.0168618691,-2.6856680474,  
1.0108963546\C,-0.8521319688,-2.0408935625,0.0850760738\C,-2.161456699  
8,-2.5215092344,-0.2398620095\C,-2.5251043811,-3.7723343252,0.25363939  
13\H,-3.5165404328,-4.1831011207,0.030254313\C,-1.6529904302,-4.553881  
966,1.0656205038\C,-0.3874423703,-3.9982700962,1.4738679859\C,0.464398  
117,-4.7931917181,2.2995726152\H,1.4398396691,-4.3969475511,2.59777460  
04\C,0.0786040244,-6.0610088063,2.7107391283\H,0.7525158155,-6.6560026  
072,3.3370908917\C,-1.1774173293,-6.5993585274,2.3211287269\H,-1.46966  
42564,-7.6004541733,2.6562498827\C,-2.0231002245,-5.8579624636,1.51129  
14372\H,-2.9920166138,-6.2623904227,1.1967595057\C,-3.995396785,4.4677  
275876,2.451939022\C,-3.9260948123,4.1023013298,1.0847794329\H,-4.7931  
568713,4.2949125694,0.4464611043\C,-2.7927556944,3.4807813689,0.582601  
1531\H,-2.7748185222,3.1710077588,-0.4655753111\C,-1.6915812639,3.1820

126156,1.4309421835\C,-1.7837404971,3.5308615855,2.7979488735\H,-0.955  
5758282,3.3063041326,3.476562788\C,-2.906107042,4.1876979656,3.3068957  
934\H,-2.9354267157,4.4598436005,4.3644131574\C,-0.5509309412,2.410254  
487,0.9357306409\C,0.0933056748,1.3942510419,1.8292012587\H,0.77771016  
48,0.7468456109,1.2655975668\H,-0.6670007787,0.7839253286,2.3388109538  
\H,0.6703485376,1.9223600581,2.6111528643\N,-0.0649039823,2.5269378851  
,-0.2834682589\H,0.5826899189,1.7373531158,-0.6416323972\C,-0.27176753  
93,3.5532444766,-1.2513245612\C,-0.2866575003,3.1784274716,-2.60716144  
65\H,-0.1852594828,2.12399223,-2.876369874\C,-0.4288316879,4.164841552  
8,-3.5923329904\C,-0.5411524184,5.5162468518,-3.2326847261\C,-0.495923  
0225,5.8842117751,-1.876558477\H,-0.5578784847,6.9395228218,-1.5903387  
011\C,-0.3566118992,4.9104463353,-0.8818401634\H,-0.3003589061,5.19887  
94939,0.1712761313\H,-0.6499143524,6.2842524939,-4.0057429947\Si,-3.52  
62595489,-1.4000972324,-0.9533036946\Si,4.5611814172,-0.0749957562,-0.  
3044060927\C,6.3146204391,-0.3238683607,0.4103463685\C,7.1426289822,-1.  
.4162433772,0.0626242047\C,6.8216897428,0.6069083517,1.350235588\C,8.4  
131717722,-1.5818347569,0.6369087207\H,6.8014421512,-2.1501374262,-0.6  
756012059\C,8.0890627137,0.4439743439,1.9318106453\H,6.220841173,1.481  
783766,1.6279811328\C,8.8884782793,-0.6542410536,1.5771278857\H,9.0345  
015617,-2.4367880957,0.3462696285\H,8.4555123614,1.179275295,2.6574427  
65\H,9.8799449705,-0.7824532816,2.0262306146\C,4.3232863187,1.80312765  
78,-0.4085079289\C,3.369003494,2.4902988466,0.3718469149\C,5.153478368  
6,2.5704692831,-1.2605975884\C,3.2319978508,3.8851875525,0.2958061796\H,  
2.7211522711,1.9252866239,1.0480341741\C,5.0127290852,3.9641361691,-  
1.351292938\H,5.9237155687,2.0770196214,-1.8664789645\C,4.0475269685,4.  
6253478145,-0.5746079428\H,2.4825791532,4.3956463149,0.9113674572\H,5.  
6597857164,4.5351535526,-2.0270264893\H,3.9346262007,5.7132047404,-0.  
6444570768\C,4.4338602711,-0.8971230719,-2.0045363016\C,4.165139849,-0.  
.152843526,-3.1743747913\C,4.5728555902,-2.300081541,-2.1338759097\C,4.  
0526549644,-0.7804362093,-4.425985328\H,4.0155999085,0.9301697561,-3.  
1112188773\C,4.4659138827,-2.930831056,-3.3808465013\H,4.7385419347,-2.  
.9192808602,-1.2442663862\C,4.2061327854,-2.1704186614,-4.5332146988\H,  
3.8342675819,-0.18106258,-5.3172943495\H,4.5716664716,-4.0194563745,-  
3.4526971811\H,4.1141133193,-2.6625290767,-5.5081735143\C,-3.052558892  
7,-0.31655516,-2.4267717391\C,-2.2622506147,-0.8354777266,-3.476402058  
6\C,-3.5670421407,0.9942413682,-2.5679495821\C,-2.0031295148,-0.078683  
3596,-4.629966978\H,-1.815171496,-1.8294718073,-3.3852026931\C,-3.3133  
406808,1.7522550998,-3.7211129737\H,-4.1749310729,1.4336075178,-1.7687  
537006\C,-2.5328960838,1.2141344568,-4.7577859283\H,-1.3726248206,-0.4  
971859172,-5.4222387381\H,-3.7152631502,2.7682512657,-3.8057951347\H,-  
2.3280940387,1.8070987261,-5.6564593835\C,-4.1557219549,-0.3407385905,  
0.4921577944\C,-3.4226629053,-0.1895465785,1.6906418746\C,-5.415886044  
4,0.3007758765,0.4046053544\C,-3.918052136,0.5795915852,2.7559858251\H,  
-2.4510634426,-0.6842245351,1.8010556134\C,-5.9139458253,1.0731441122  
1,4.643233087\H,-6.0235658626,0.1878193764,-0.5015428864\C,-5.16374399  
79,1.2156069083,2.6430250575\H,-3.3281858115,0.6844604699,3.6733680048  
\H,-6.8883646661,1.566001778,1.3716321511\H,-5.5497239391,1.8237198329,  
3.4684239964\C,-4.9688995099,-2.5158933494,-1.4977179582\C,-5.90459469  
04,-3.000919614,-0.5519084657\C,-5.1319690523,-2.9094026065,-2.8460264  
864\C,-6.9551776776,-3.8491775893,-0.9354268019\H,-5.8149110946,-2.708  
2800946,0.5014857778\C,-6.1815134106,-3.7569115628,-3.2351312087\H,-4.  
4340802976,-2.5450954882,-3.6092710791\C,-7.0950780598,-4.2299826078,-  
2.2797680036\H,-7.6668761603,-4.2113002426,-0.1846244166\H,-6.28766050  
75,-4.0458590981,-4.2870971722\H,-7.9160641649,-4.8899313291,-2.582423  
3747\H,-0.4517777554,3.8696604259,-4.6463906099\O,-5.1454001221,5.0535  
981476,2.8459849176\C,-5.3028283469,5.4306291798,4.2231584146\H,-4.541  
860781,6.1749877366,4.5197156597\H,-6.3046726179,5.8782880542,4.295626  
375\H,-5.2432539788,4.5486995642,4.8865265537\Version=ES64L-G09RevD.0  
1\State=1-A\HF=-4089.0593196\RMSE=5.278e-09\RMSF=2.596e-06\Dipole=-3.0  
915889,5.0495288,4.8014437\Quadrupole=-14.6266977,12.9159746,1.7107231  
,-13.5528362,-8.0529718,10.6130341\PG=C01 [X(C71H56N1O5P1Si2)]\@

### TIPSY/5 Type II Z

1\1\GINC-WORKER\FOpt\RTPSSTPSS\def2SVP\W06\C71H56N1O5P1Si2\JHIOE\15-No  
v-2015\0\#p tpsstps\def2svp/w06 densityfit empiricdispersion=gd3 o  
pt scrf=(smd,solvent=ch2cl2,read)\title\0,1\P,0.8036362744,0.2659069  
07,1.7183314518\O,2.0458581008,1.3086247906,1.3117850366\O,-0.35379063  
88,0.7503950095,0.5519240536\O,0.3967815805,0.6008241241,3.1203883892\  
O,1.1784892938,-1.1407954917,1.25153993\C,1.6717900163,2.1162117362,-0



.8759321809\C,2.4410367222,1.3342050263,-0.0124906439\C,3.5939685133,0.5945496353,-0.4178659413\C,3.9465792771,0.677549226,-1.7638164988\H,4.82883174,0.143299571,-2.1360351358\C,3.1754863023,1.4094499967,-2.7135887402\C,2.0041888323,2.1294983379,-2.2765902541\C,1.1969635985,2.7718229893,-3.2642466902\H,0.2835567716,3.2882462422,-2.9561767932\C,1.5453365131,2.7316597404,-4.6066132232\H,0.9056206626,3.224039588,-5.3472242902\C,2.7177652099,2.0497372254,-5.0316642468\H,2.9815806682,2.0291556741,-6.0945826529\C,3.5123814481,1.3994419665,-4.1011392943\H,4.4071399703,0.8510785635,-4.4169213124\C,0.474095066,2.8260323215,-0.3413491487\C,-0.5480447415,2.0917469055,0.2780312882\C,-1.8442701786,2.6443838346,0.535093016\C,-2.0021314341,4.0167767378,0.3516010904\H,-2.9750165939,4.4857804312,0.5373135355\C,-0.9390007278,4.8534968969,-0.0968754517\C,0.3122190094,4.2500368744,-0.4795022535\C,1.3571461517,5.0996754181,-0.9531280352\H,2.3205181886,4.6584585465,-1.2261134186\C,1.1708821525,6.4708783755,-1.0519647473\H,1.9899334424,7.1050712387,-1.4088491472\C,-0.0689942172,7.0624643271,-0.6881190699\H,-0.2022236998,8.1462756618,-0.7751367919\C,-1.1012287552,6.266099045,-0.2172725125\H,-2.0612700218,6.7091141592,0.0716462918\C,-5.1847022658,-4.5566304926,-1.0188323297\C,-4.5870831148,-3.4081127343,-1.5943287023\H,-5.1319007172,-2.8666320265,-2.3720965231\C,-3.344508527,-2.9698698276,-1.1615785657\H,-2.9251605823,-2.0604457978,-1.5999414377\C,-2.6510086975,-3.6544271306,-0.1250628476\C,-3.2765860316,-4.7795823347,0.4640620333\H,-2.7764905004,-5.3230663177,1.2707950139\C,-4.5161721203,-5.2434380258,0.0199357329\H,-4.9548258111,-6.1295674747,0.4845721794\C,-1.3885041916,-3.1528803611,0.4160341553\C,-1.079611219,-3.3496452556,1.8709794801\H,-0.2117751324,-2.7452294571,2.172923649\H,-0.8412204673,-4.4168249935,2.0411294927\H,-1.9550752223,-3.0992279958,2.4897180795\N,-0.4843020443,-2.4937342129,-0.2851541235\H,0.2536385379,-1.9736555564,0.3035626988\C,-0.3197629317,-2.3548949925,-1.6937442208\C,0.2334752097,-1.1510824014,-2.1678531483\H,0.4532087669,-0.3463130575,-1.4612891665\C,0.49383908,-1.0011659324,-3.5363950415\H,0.9187137762,-0.0613219924,-3.9013128117\C,0.2115910823,-2.0460635431,-4.4289680428\C,-0.3210704197,-3.2536641675,-3.9448488053\H,0.5221985694,-4.0817196874,-4.6327752573\C,-0.5812269327,-3.4186339843,-2.579861505\H,-0.9670324014,-4.36837522,-2.2002426167\H,0.4169147434,-1.9259450876,-5.4978607773\Si,-3.4067504063,1.5663835713,0.6874801559\Si,4.5776672492,-0.572893934,0.7282360841\C,6.4270386558,-0.3636636528,0.3071776067\C,7.2984103032,0.4656892889,1.0505812902\C,6.9701139351,-1.0535688429,-0.8048032282\C,8.6488117609,0.6108637228,0.6935070351\H,6.9263270642,1.0029769692,1.9302324957\C,8.3177212155,-0.9082849542,-1.1696278289\H,6.3323082397,-1.7253368215,-1.3926123229\C,9.16133474,-0.0730439957,-0.420213116\H,9.3031782942,1.2573857352,1.289596138\H,8.7110040528,-1.4536581653,-2.0353246421\H,10.2153880192,0.0389318665,-0.6986901817\C,4.1566110058,-2.3711026584,0.3039248263\C,3.1502611097,-2.7131705887,-0.6244908014\C,4.8802620967,-3.4242082137,0.9133887053\C,2.8645310355,-4.053596438,-0.9275457906\H,2.5748101551,-1.9210285524,-1.1125691599\C,4.5936074897,-4.7669660321,0.6212485845\H,5.681464528,-3.1970082538,-1.6279508142\C,3.5824203728,-5.0845516244,-0.3005813429\H,2.0766846521,-4.2903673299,-1.6515423179\H,5.1624886031,-5.5660391483,1.1104484946\H,3.358464447,-6.1322295173,-0.5320431549\C,4.291109556,-0.2058720658,2.5620013951\C,3.8330269409,-1.2012409493,3.4526627507\C,4.4842888918,1.099811126,3.0729426612\C,3.5809454762,-0.9072841407,4.8029451343\H,3.6476182188,-2.2170973803,3.0867769593\C,4.2363794311,1.3980923683,4.4197087789\H,4.8040372021,1.9075822846,2.4036762124\C,3.783093182,0.3925442186,5.2897565245\H,3.2163908431,-1.6945211153,5.4728385559\H,4.3851626962,2.4192305278,4.7891882083\H,3.5801264202,0.6253129767,6.3413646255\C,-3.7534318802,0.8697261006,-1.047003476\C,-5.0673841092,0.4843551074,-1.4092881507\C,-2.7369336075,0.7280262727,-2.019472338\C,-5.3517626039,-0.0261517439,-2.6852100993\H,-5.8872577007,0.5935647521,-0.6891818176\C,-3.0151271501,0.2137421824,-3.2959044758\H,-1.7083493024,1.0199708427,-1.7848036216\C,-4.3240425103,-0.1651723332,-3.6321476693\H,-6.37713691,-0.3170627829,-2.9400297364\H,-2.2057337486,0.1080077411,-4.0264146651\H,-4.5431858693,-0.5663348129,-4.6280510902\C,-4.8477992875,2.7217902871,1.1454169184\C,-5.5045928787,3.5045966893,0.1654248119\C,-5.2691821669,2.8580181028,2.4884417153\C,-6.5369576457,4.3898141898,0.5128525468\H,-5.2061048647,3.422582273,-0.8867588422\C,-6.3002320424,3.743136412,2.8415919541\H,-4.7873126413,2.2629402378,3.2737106677\C,-6.9368514459,4.5110059386,1.8536210833\H,-7.0312342586,4.984528997,-0.2638734863\H,-6.6091903437,3.8308695903,3.8895555755\H,-7.7439159049,5.2002168563,2.1270545611\

C,-3.3909835658,0.1887335095,1.9814456329\C,-2.6424588996,0.3058419011  
,3.1733397654\C,-4.2584394434,-0.9216750084,1.8457891596\C,-2.76501432  
12,-0.6448676931,4.1993372101\H,-1.9329136821,1.1291798789,3.295792940  
5\C,-4.3881203606,-1.8702419386,2.8716071725\H,-4.842099499,-1.0548957  
653,0.927570854\C,-3.64550173,-1.7285661634,4.0562452729\H,-2.16263304  
93,-0.5404253224,5.1087510657\H,-5.0632325255,-2.7237781824,2.74225080  
2\H,-3.7419518765,-2.4696942989,4.8578558282\O,-6.3877826363,-4.905529  
4092,-1.5178112161\C,-7.0727540752,-6.0445097521,-0.9710656249\H,-8.01  
44044587,-6.1204567605,-1.5340805933\H,-6.4814495465,-6.9676208846,-1.  
1099880644\H,-7.2927927288,-5.8966708632,0.1017220795\Version=ES64L-G  
09RevD.01\State=1-A\HF=-4089.0624805\RMSE=4.962e-09\RMSF=4.191e-06\Dip  
ole=-4.1466294,-4.7112296,-3.4343391\Quadrupole=0.6755835,23.1820437,-  
23.8576271,34.5447013,-7.9584256,-4.4817681\PG=C01 [X(C71H56N1O5P1Si2)  
]\@

#### TIPSY/4 Type I E

1\1\GINC-LOGIN\FOpt\RTPSSTPSS\def2SVP/W06\C71H53F3N1O4P1Si2\JHIOE\15-N  
ov-2015\0\p tpsstps\def2svp/w06 densityfit empiricaldispersion=gd3  
opt scrf=(smd,solvent=ch2cl2,read)\title\0,1\P,0.3014353525,-0.54975  
20906,-1.431257563\O,-0.9499440114,0.5427685516,-1.6993063089\O,1.2112  
678277,0.2788424359,-0.2619516967\O,1.0175905469,-0.6743197114,-2.7424  
792498\O,-0.2237964717,-1.7412289197,-0.6475216795\C,-0.7537158599,2.3  
046376891,-0.0821949946\C,-1.5165301831,1.3111157578,-0.7012917839\C,-  
2.9121092397,1.1244532297,-0.4510939142\C,-3.5044538402,1.9195942839,0.  
.5241445972\H,-4.5724817485,1.8151717661,0.7425465635\C,-2.7555332136,  
2.8628573173,1.2869276841\C,-1.3555344215,3.051349792,0.9983764847\C,-  
0.6137638539,3.9495111397,1.8239869871\H,0.4584700391,4.0758655884,1.6  
486912306\C,-1.2283012039,4.6458022994,2.8549312827\H,-0.6342583681,5.  
3204000586,3.4814076197\C,-2.6160707065,4.4862141017,3.1123073701\H,-3  
.0880616336,5.0448609398,3.927716319\C,-3.3605599018,3.6059139197,2.34  
39699403\H,-4.4243822549,3.4457346788,2.550821219\C,0.6437897092,2.588  
747198,-0.5142532428\C,1.6131270099,1.580640665,-0.4945848462\C,3.0160  
052413,1.8473075262,-0.5944139858\C,3.3966061973,3.1537512403,-0.89361  
03778\H,4.4591295132,3.4153963321,-0.9565644261\C,2.4441297414,4.18818  
56035,-1.1260714362\C,1.0441910249,3.9120872659,-0.9241746903\C,0.1062  
897513,4.9599348518,-1.1698661918\H,-0.9626230226,4.757764629,-1.05426  
28007\C,0.5313663165,6.217384647,-1.5733181178\H,-0.207875477,7.002275  
0654,-1.7680214108\C,1.9144392085,6.4959205658,-1.7432946709\H,2.23484  
81348,7.4959709831,-2.0550343551\C,2.8501499079,5.497271436,-1.5245105  
894\H,3.9197239171,5.6934473186,-1.662171956\C,-2.540117745,-0.8705222  
366,3.7014376916\C,-2.5104045736,-2.1919695451,4.1728311228\H,-3.27011  
91591,-2.5433116181,4.8758272613\C,-1.5085757542,-3.0609024602,3.73163  
03457\H,-1.5029793668,-4.093674059,4.090435101\C,-0.5541942024,-2.6252  
675264,2.7855701871\C,-0.5749342674,-1.2822268073,2.3431219857\H,0.181  
5694973,-0.913537143,1.6475978523\C,-1.5599855178,-0.4085712443,2.8048  
979849\H,-1.5740772815,0.6267987025,2.453942721\C,0.4175993653,-3.5996  
373974,2.2450309958\C,0.9370253246,-4.6931530301,3.126255513\H,1.91212  
80096,-5.0644055116,2.7770122523\H,0.2289177299,-5.5425054226,3.128106  
2562\H,1.0236932601,-4.3276487144,4.1604178146\N,0.770461448,-3.469318  
5854,0.9898552583\H,0.3392701104,-2.667633193,0.3853545384\C,1.6397773  
705,-4.2923440632,0.214512875\C,2.5252489601,-3.6342031364,-0.66127149  
04\H,2.5569917587,-2.5431487248,-0.6870026127\C,3.3768841559,-4.388400  
9602,-1.4755422214\H,4.0735220017,-3.8711843375,-2.1422520216\C,3.3317  
355809,-5.7914311894,-1.4375824514\C,2.4221366582,-6.4410044931,-0.587  
7816849\H,2.3645664703,-7.5343894541,-0.5740776974\C,1.5693755914,-5.6  
982095645,0.2393577438\H,0.8336024445,-6.2049227197,0.8682550702\H,3.9  
960478058,-6.3784351647,-2.0805077765\C,-3.6565187203,0.0567152712,4.1  
125234152\Si,-3.9184420549,-0.1165585757,-1.4792911522\C,-3.3395174688  
,-1.8885781502,-1.167449372\C,-3.3396031414,-2.3985929019,0.1520497084  
\C,-2.8813173053,-2.7316211554,-2.2032793811\C,-2.9159627542,-3.708023  
4192,0.4216676075\H,-3.6603280492,-1.7632985414,0.9867554271\C,-2.4425  
013115,-4.0374077793,-1.9359552448\H,-2.8476872734,-2.3610118321,-3.23  
44407788\C,-2.4621388745,-4.5297077165,-0.6225237272\H,-2.9324633072,-  
4.0830171843,1.4505148188\H,-2.0782510357,-4.6691383493,-2.7543180237\  
H,-2.1200123045,-5.5496528247,-0.4113569404\C,-5.7368076079,0.06973139  
77,-0.9464144654\C,-6.4453802591,-0.9175557648,-0.2259767561\C,-6.4253  
091366,1.2618188933,-1.2814015925\C,-7.7826406236,-0.7208229382,0.1569  
848757\H,-5.9522763812,-1.8597423668,0.0384908029\C,-7.7598688023,1.46  
49252594,-0.8999515105\H,-5.9095173184,2.0460624889,-1.8501093227\C,-8

.4417927005,0.4722244034,-0.1763692234\H,-8.3104079575,-1.5028078848,0.7150623736\H,-8.2703866866,2.3967991164,-1.16905351\H,-9.4850100699,0.6273378091,0.1217173006\C,-3.8518435569,0.3383675999,-3.3176852153\C,-4.6119821846,-0.4203836801,-4.2407302522\C,-3.1262103932,1.4454415391,-3.8119463871\C,-4.6319984485,-0.0977701235,-5.6061136514\H,-5.2021452761,-1.2761934432,-3.8887992977\C,-3.1490925927,1.7768274394,-5.1763415558\H,-2.5327381664,2.0607001173,-3.1269703578\C,-3.8982093693,1.0034877016,-6.0769385189\H,-5.2234982878,-0.702925355,-6.3027515293\H,-2.5780538437,2.640297082,-5.5364443453\H,-3.913235898,1.2594972973,-7.1424529051\Si,4.3343583034,0.5653718036,-0.09578518\C,3.7358814711,-0.3676301038,1.4424848704\C,4.1167859855,-1.7036267265,1.6984277411\C,2.9306995143,0.2869277546,2.4052148377\C,3.7084553616,-2.3642348835,2.8686205137\H,4.7343473292,-2.2451628162,0.972972771\C,2.5248087743,-0.3665657755,3.5780384375\H,2.6045390656,1.3200350517,2.2337100771\C,2.9137130372,-1.6956413622,3.8125676043\H,4.0097009375,-3.4035755012,3.0403896398\H,1.8934881448,0.1572672623,4.3044460733\H,2.5926103495,-2.2088148913,4.7257904835\C,5.8819808147,1.5613436477,0.3908422571\C,6.1034307798,1.9814000283,1.722642927\C,6.8230229431,1.9545909804,-0.590977641\C,7.2154367296,2.768924799\H,5.3999173038,1.6885610894,2.5114674269\C,7.9348999977,2.7443557623,-0.2585919617\H,6.6859856988,1.6392982166,-1.6327083067\C,8.1327272183,3.1539214254,1.0700030001\H,7.3674748263,3.081238401,3.1005522187\H,8.6487470523,3.0384019001,-1.0366000804\H,9.0009954822,3.7688984674,1.332824834\C,4.8559406657,-0.5914792921,-1.4983773538\C,6.0488193165,-1.3465227179,-1.3720210851\C,4.1349340021,-0.6864424178,-2.7093589602\C,6.5030499335,-2.1666798043,-2.4157284921\H,6.6421599536,-1.2833421889,-0.4514315264\C,4.5897641566,-1.5049325664,-3.7567506784\H,3.191387779,-0.1455140338,-2.8331536605\C,5.7749131336,-2.243216677,-3.6151884239\H,7.4288033161,-2.7409854843,-2.2961571083\H,4.0105390797,-1.5671435184,-4.6851012999\H,6.129866861,-2.8793091919,-4.4340257812\F,-3.1945232699,1.2715174617,4.5034217592\F,-4.5183018989,0.2836868275,3.0783851123\F,-4.3971006902,-0.4360077372,5.1334602186\Version=ES64L-G09RevD.01\State=1-A\HF=-4311.4204564\RM SD=3.937e-09\RMSF=1.864e-06\Dipole=1.2431025,-3.9895733,4.3433036\Quadrupole=-18.1773123,34.5616125,-16.3843001,-7.2414788,-4.1105377,-22.4284811\PG=C01 [X(C71H53F3N1O4P1Si2)]\@

#### TiPSY/4 Type II E

1\1\GINC-WORKER1\FOpt\RTSPSS\def2SVP\W06\C71H53F3N1O4P1Si2\JHIOE\01-  
Dec-2016\0\#p opt scrf=(smd,solvent=ch2cl2,read) tpsstps/def2svp/w0  
6 densityfit empiricaldispersion=gd3\title\0,1P,0.1441088148,0.4612  
411199,-0.8506673355\O,1.2612117211,-0.4954665003,-1.6484157884\O,-0.8724429572,-0.7538829217,-0.2135009415\O,-0.555675592,1.2941581855,-1.8798337606\O,0.7870020741,1.0273125512,0.4160778254\C,1.2219594381,-2.621190017,-0.5872190572\C,1.9010794256,-1.4292625709,-0.8475074078\C,3.1856733206,-1.1089007818,-0.3217467484\C,3.7716677765,-2.050000359,0.5229496842\H,4.7525121023,-1.8513947084,0.9727119302\C,3.1214377772,-3.2694825595,0.8718465007\C,1.8207683487,-3.5654233669,0.3215732333\C,1.561534123,-4.7504074932,0.7620944353\H,0.1529699465,-4.9725479273,0.3879521372\C,1.7557728568,-5.6100631178,1.671293378\H,1.222283553,-6.5089051654,1.9996389744\C,3.0499728818,-5.3318693353,2.188321386\H,3.5116005909,-6.0213218072,2.9034137292\C,3.7144914577,-4.1807667204,1.7970077467\H,4.7042891473,-3.9419621189,2.2022520022\C,-0.1353379842,-2.8354093994,-1.1683445567\C,-1.1593222133,-1.9167883009,-0.8998281633\C,-2.5346831845,-2.1773761876,-1.2000720138\C,-2.8284988843,-3.3280817237,-1.9266484616\H,-3.8696783957,-3.5772659862,-2.1633148209\C,-1.8103309967,-4.2174282621,-2.3797559963\C,-0.4430643812,-3.980486015,-1.9866277102\C,0.5592633363,-4.8856825579,-2.4503509033\H,1.6048732702,-4.7067820467,-2.1822360386\C,0.2269769055,-5.9719454625,-3.2467366471\H,1.0148286972,-6.6471656447,-3.5985669578\C,-1.1234534499,-6.2139614318,-3.6170547266\H,-1.3711374029,-7.077719102,-4.2435574542\C,-2.1196886908,-5.3495711347,-3.1912689703\H,-3.1647497401,-5.5175591553,-3.4758580892\C,-1.6391144543,5.055108801,-0.0613843578\C,-1.1901750539,5.5877842209,1.1624516958\H,-1.0280997206,6.66467913,1.268466209\C,-0.9370375136,4.7350750978,2.2389832178\H,-0.5681315687,5.148928332,3.1820121079\C,-1.1080432534,3.3387168319,2.0906456657\C,-1.6017061862,2.8261056747,0.8729617141\H,-1.8104066792,1.7592309096,0.7723069316\C,-1.8626489168,3.6786645241,-0.2020631276\H,-2.2113198031,3.2563415443,-1.1461536977\C,-0.7386670033,2.4251429515,3.1944238553\C,-1.0890771977,2.7837056722,4.6032095279\H,-1.3141120531,1.8836298703,5.1967200419\H,-1.95464265

79,3.4619182769,4.6131828152\H,-0.2402616931,3.3046104527,5.084939468\N,-0.1109924455,1.3246636996,2.8504695302\H,0.1442594396,1.2125811076,1.7999844088\C,0.3837209997,0.2383147142,3.6246346482\C,0.4833022185,-0.9936299995,2.9421853097\H,0.1572633417,-1.0570876796,1.9001787144\C,0.9808948948,-2.1165525082,3.6092852641\H,1.0455804046,-3.0716153105,3.0793817216\C,1.3995571922,-2.0168591815,4.9458184175\C,1.3290051615,-0.7824125308,5.6100017618\H,1.6795279602,-0.692314476,6.6433457878\C,0.8283034839,0.35237457,4.9577560181\H,0.826787382,1.3119729591,5.4757175282\H,1.7940073229,-2.8971988843,5.4639430705\C,-1.8206440553,5.977171648,-1.2409876279\Si,4.1421168418,0.5066065877,-0.6548601617\Si,-3.9199474187,-1.1382798031,-0.4126025396\C,5.6637126206,0.0841488703,-1.7152237969\C,6.4251667469,1.1382238999,-2.2783511577\C,6.0880765075,-1.2402161192,-1.9679781373\C,7.5682279451,0.8803292898,-3.0502797469\H,6.1165576075,2.1789883388,-2.1181995799\C,7.2281684465,-1.5040287679,-2.7445872312\H,5.5184813136,-2.0834058085,-1.5602144748\C,7.972422924,-0.4441325653,-3.2854799547\H,8.1409322843,1.7132710963,-3.4740942399\H,7.5331978017,-2.5402826626,-2.9305680746\H,8.8614636383,-0.6486494682,-3.8928574507\C,4.6926024571,1.1228240655,1.0544615716\C,3.748857683,1.1621215554,2.1097415067\C,6.0056189412,1.5712015589,1.3208041611\C,4.1031291425,1.6384143269,3.3807392038\H,2.7248544652,0.8187748291,1.9253350966\C,6.364962073,2.046109864,2.5934174725\H,6.7626352912,1.5468321331,0.5275901683\C,5.4138580485,2.0815098501,3.6253379586\H,3.3557657711,1.6584486419,4.182102032\H,7.3901800164,2.3863652772,2.7796046702\H,5.6937367545,2.4503415903,4.6187747799\C,3.2260649932,1.9034165709,-1.5504082242\C,2.7828862522,3.0550311694,-0.8631195548\C,2.9849979344,-1.8300987701,-2.9421567002\C,2.1086331074,4.0870162102,-1.5339719741\H,2.9509864635,3.1421144875,0.2156636255\C,2.3114201767,2.8582035917,-3.6174884714\H,3.3180184035,0.9512079275,-3.5073423945\C,1.8658650347,3.9884187975,-2.9123981362\H,1.7581407185,4.9642135494,-0.9790978435\H,2.1245473042,2.7737897624,-4.6943062539\H,1.3232977058,4.7865111133,-3.4315906763\C,-5.5211062245,-2.15631105,-0.5650852819\C,-5.9496425005,-3.0477610756,0.4451944279\C,-6.3047147662,-2.0661508995,-1.7406593748\C,-7.1102646462,-3.8223598422,0.2875199618\H,-5.373394822,-3.1385715038,1.373811319\C,-7.4648820099,-2.8392875114,-1.9042095632\H,-6.0060512856,-1.3796870742,-2.5426574688\C,-7.8698512153,-3.7206987648,-0.8888895919\H,-7.4236133049,-4.5047618838,1.0860531461\H,-8.054571246,-2.7514823964,-2.8239972913\H,-8.7765028497,-4.3238754174,-1.0125400992\C,-4.2478472613,0.5049810084,-1.284730707\C,-3.494579355,0.9362448913,-2.3978676191\C,-5.3289843746,1.316509613,-0.8581538918\C,-3.7963397715,2.1435497834,-3.0499283427\H,-2.6440577333,0.3438569816,-2.7458297776\C,-5.6269180707,2.5266694658,-1.5012429239\H,-5.9559770246,0.9962018336,-0.0166853162\C,-4.857601743,2.9436689081,-2.6005675007\H,-3.1862021028,2.4679994325,-3.9002578662\H,-6.4622393554,3.142291066,-1.1482434881\H,-5.081531135,3.8923708412,-3.1008779171\C,-3.5239594434,-0.9292863343,1.4322825367\C,-2.9729768894,-2.0190389784,2.1495227299\C,-3.801259231,0.2564130175,2.1485202803\C,-2.7187080279,-1.9314172768,3.526376338\H,-2.7266187446,-2.9502924007,1.6241586159\C,-3.5409546556,0.3512859627,3.5255400715\H,-4.2173562283,1.1271634744,1.6300037232\C,-3.0019422999,-0.7431552243,4.2189986671\H,-2.2842571136,-2.7855208205,4.0573703051\H,-3.7595483692,1.2842182459,4.0566801253\H,-2.7937313924,-0.6693451897,5.292243433\F,-2.4408124758,7.1349530679,-0.893878155\F,-0.6199400712,6.3357332585,-1.7831224188\F,-2.5459154148,5.4169151178,-2.2378030911\Version=ES64L-G09RevD.01\State=1-A\HF=-4311.4211313\RMSE=2.448e-09\RMSF=3.683e-06\Dipole=-0.4400647,-0.0768842,6.4076198\Quadrupole=-17.744294,-0.9705873,18.7148812,-5.0472614,1.3271282,24.507198\PG=C01[X(C71H53F3N1O4P1Si2)]\@

#### TIPSY/4 Type I Z

1\1\GINC-LOGIN\FOpt\RTPSSSTPSS\def2SVP\W06\C71H53F3N1O4P1Si2\JHIOE\19-Nov-2015\0\#p tpsstps\def2svp\w06 densityfit empiricaldispersion=gd3 opt scrf=(smd,solvent=ch2cl2,read)\title\0,1\p,0.6627458837,-0.5160601969,-1.6514951178\O,1.6856521963,-1.7140025338,-1.0866181981\O,-0.6059023003,-0.6746404539,-0.5188174967\O,0.2677745405,-0.9031792609,-3.0418935088\O,1.2683775726,0.8415586269,-1.2879073584\C,1.0454234968,-2.2732899616,1.1208354421\C,1.991672095,-1.7100446659,0.2612866225\C,3.2381271988,-1.1599294736,0.6972502773\C,3.5073894607,-1.2296579865,2.0631794062\H,4.4571384423,-0.84921318,2.4568088391\C,2.5661519006,-1.7412629865,3.0042980736\C,1.2972708417,-2.244799172,2.5382580912\C,0.3293212869,-2.6420423146,3.5102291076\H,-0.6539471462,-2.9856981777,3.1766

28836\C,0.6146143874,-2.5832888032,4.866546008\H,-0.1462674399,-2.8871  
162201,5.5938999626\C,1.8820241527,-2.1295256443,5.3222480208\H,2.0957  
378243,-2.0975763154,6.3961180924\C,2.8349916015,-1.7132653183,4.40662  
48559\H,3.8085013612,-1.3399495436,4.7448223116\C,-0.2364488137,-2.790  
1455412,0.5605064641\C,-1.066481252,-1.9327727361,-0.1762516859\C,-2.4  
237724546,-2.2593214937,-0.496962385\C,-2.8529249911,-3.555667811,-0.2  
210016316\H,-3.88467023,-3.8504252691,-0.4454440516\C,-1.9975123389,-4  
.5318410717,0.368848108\C,-0.6756061134,-4.1423489972,0.7904008932\C,0  
.1599994611,-5.1287629696,1.3959012156\H,1.1749432583,-4.8551651536,1.  
6990482838\C,-0.291623595,-6.4265583045,1.5856128848\H,0.3706514416,-7  
.1693989007,2.0437849124\C,-1.6013325079,-6.8045898944,1.1844706876\H,  
-1.9450631434,-7.8324274042,1.3436811375\C,-2.434589507,-5.8731542655,  
0.5848090695\H,-3.4446543026,-6.1524485344,0.2635479491\C,-3.579282538  
1,4.4445379399,3.274113593\C,-3.6396295534,4.1689862011,1.8964374146\H  
, -4.5152351,4.4639822774,1.3116209455\C,-2.5794662456,3.5088629457,1.2  
759575696\H,-2.6318999928,3.2809635322,0.2086176043\C,-1.4567716122,3.  
10017695,2.0306145327\C,-1.4193050696,3.3533652389,3.4173566043\H,-0.5  
611719638,3.0310827143,4.0142755038\C,-2.471068407,4.0393034078,4.0342  
036783\H,-2.4319740674,4.2518536023,5.1059864339\C,-0.3917256712,2.309  
8565193,1.3761210354\C,0.148921499,1.1029916304,2.0716313386\H,0.76388  
59662,0.4948923093,1.3962922314\H,-0.6696114789,0.5003531083,2.4918028  
089\H,0.7731816827,1.4420583061,2.9202864669\H,0.0792110635,2.60095524  
41,0.1898430758\H,0.6566973912,1.8326845752,-0.3287510261\C,-0.0845541  
99,3.7873812851,-0.5846781793\C,-0.1471253365,3.6445764419,-1.98297120  
69\H,-0.1099734937,2.6457942341,-2.425214234\C,-0.2551324551,4.7886800  
243,-2.7839662213\C,-0.2837042499,6.063778826,-2.1987599281\C,-0.19146  
09808,6.1966875083,-0.8020959416\H,-0.1893236025,7.1904569038,-0.34232  
78031\C,-0.0886662924,5.0634226673,0.011573178\H,0.006296188,5.1653031  
732,1.0959173498\H,-0.3642375419,6.9557224421,-2.8289211499\C,-4.75753  
1778,5.107594536,3.9437256174\Si,-3.7278377808,-0.9245773414,-0.880205  
9579\Si,4.4328067045,-0.2166649316,-0.4584935041\C,6.2149250946,-0.529  
7396022,0.1525812227\C,7.1059925429,-1.4366501247,-0.4665461675\C,6.69  
0842988,0.1844922896,1.2801639472\C,8.4057815358,-1.6356511862,0.02678  
18183\H,6.791968681,-1.9951583154,-1.3550012536\C,7.9853337302,-0.0169  
786858,1.7835553694\H,6.0431727982,0.9213066398,1.7712357918\C,8.84790  
44289,-0.9303742769,1.1567932627\H,9.0758407311,-2.3422658629,-0.47635  
18524\H,8.3238077332,0.5472254901,2.6601810762\H,9.8615463887,-1.08633  
55229,1.5431491262\C,4.1626723009,1.6480080306,-0.2240002528\C,3.41263  
19339,2.1449501103,0.8642296145\C,4.7776531589,2.5897130626,-1.0823326  
128\C,3.2613584539,3.5234216717,1.0798285907\H,2.9355463958,1.44195509  
43,1.5541092359\C,4.6142157132,3.9700600059,-0.8834069891\H,5.39466892  
56,2.2475055094,-1.9218894907\C,3.8522546644,4.4414810817,0.1978262832  
\H,2.6741453245,3.8816548451,1.9331709116\H,5.0874172498,4.6795418266,  
-1.5719394795\H,3.7225824982,5.5183761858,0.3536328777\C,4.2431797823,  
-0.7869211262,-2.2512412753\C,3.8345818518,0.0791374228,-3.2890672272\C  
,4.4411650965,-2.1519177363,-2.5714453629\C,3.6437385973,-0.394368640  
6,-4.59707786\H,3.672614059,1.1312372149,-3.0723551808\C,4.2591297278,-  
2.6281472203,-3.8773946125\H,4.7155774474,-2.8648388424,-1.7843510803\C  
,3.8601075882,-1.7474516117,-4.8963184834\H,3.3130265197,0.2955904571  
, -5.3818362928\H,4.4144832024,-3.6904452667,-4.0979667475\H,3.70810899  
48,-2.1181845254,-5.9164047665\C,-3.2499415997,0.3416164258,-2.1991483  
603\C,-2.5682605519,-0.0659151944,-3.3672383135\C,-3.6273378918,1.7010  
666255,-2.0907299919\C,-2.278708713,0.8476555438,-4.3929396007\H,-2.22  
6976388,-1.1004430618,-3.4678680913\C,-3.3403431868,2.6175269877,-3.11  
34940335\H,-4.1491479063,2.0538920097,-1.1943387167\C,-2.6667390816,2.  
1903145433,-4.2700010181\H,-1.7321105225,0.5106211137,-5.2805089769\H,  
-3.6329078585,3.6679170873,-3.0031521868\H,-2.4347426649,2.9062760354,  
-5.0667386212\C,-4.1231221353,-0.079678557,0.7753689154\C,-3.321848798  
3,-0.2803155693,1.9214871412\C,-5.2659261571,0.7477412535,0.910128627\C  
, -3.6331574814,0.3284267573,3.1482278079\H,-2.440851177,-0.9285050941  
,1.8614682611\C,-5.5774400363,1.3643253999,2.1313417853\H,-5.9298361519  
,0.9085961249,0.0518240517\C,-4.7596181897,1.157004165,3.2542804768\H,  
-2.9917785993,0.1566973097,4.0201499593\H,-6.4555666662,2.0149422746,2.  
2092756994\H,-4.9995541255,1.6461616138,4.2034899006\C,-5.3044481018,  
-1.8154770249,-1.4603587025\C,-6.2389573308,-2.3208697122,-0.524953991  
6\C,-5.5611758254,-2.0350414089,-2.8336865639\C,-7.3807496506,-3.02241  
63867,-0.9433424901\H,-6.0741844516,-2.1643868458,0.5480665066\C,-6.70  
09558274,-2.7365536147,-3.2571203756\H,-4.8635996199,-1.650916541,-3.5  
876880118\C,-7.6130636486,-3.2330919064,-2.3119836963\H,-8.0902490453,

-3.4043376993,-0.2003115224\H,-6.8786062973,-2.8941621006,-4.327126793  
\H,-8.5040520966,-3.7796509144,-2.6414616609\H,-0.3162393946,4.6781982  
738,-3.8714391029\F,-5.3248816371,6.055100322,3.156055501\F,-5.7428843  
083,4.2078470832,4.232435579\F,-4.4229685374,5.7028646571,5.113560961  
1\Version=ES64L-G09RevD.01\State=1-A\HF=-4311.4130426\RMSE=5.113e-09  
RMSF=2.523e-06\Dipole=-0.9373424,3.4293677,3.7817649\Quadrupole=-16.26  
26946,15.0895882,1.1731064,6.7514346,13.686041,-8.95926\PG=C01 [X(C71H  
53F3N1O4P1Si2)]\@

#### TiPSY/4 Type II Z

1\1\GINC-LOGIN\Opt\RTPSSTPSS\def2SVP/W06\C71H53F3N1O4P1Si2\JHIOE\15-N  
ov-2015\0\#p tpsstps\def2svp/w06 densityfit empiricaldispersion=gd3  
opt scrf=(smd,solvent=ch2cl2,read)\title\0,1\P,1.0831348161,0.473625  
6814,1.693841658\O,2.4356499756,1.299803922,1.1658668207\O,-0.04710736  
1,1.004007325,0.5242135278\O,0.7820266833,0.9654412667,3.0753003679\O,  
1.245729757,-1.0064398826,1.3348751576\C,2.0874934648,1.9473857355,-1.  
0808257809\C,2.7812454598,1.1541466148,-0.1654250712\C,3.8103642808,0.  
2326380039,-0.5248413838\C,4.1219989025,0.1426295739,-1.8806260189\H,4.  
9110138574,-0.5396129944,-2.2197404671\C,3.4205257457,0.8814569366,-2.  
.8778620796\C,2.3700834179,1.7887682333,-2.4838697727\C,1.6218179698,2.  
.4437601366,-3.508785046\H,0.7948300386,3.1022470371,-3.2292382613\C,1.  
.9163511428,2.2387621106,-4.8487917589\H,1.3226285834,2.7453206627,-5.  
6175606667\C,2.973569537,1.3707607581,-5.2347558777\H,3.1969034536,1.2  
217765089,-6.2966472808\C,3.7062463399,0.7041286159,-4.2657076373\H,4.  
5110040046,0.0164494664,-4.5494600786\C,1.010819789,2.8560696731,-0.59  
09427357\C,-0.0754119294,2.3278153243,0.1213509608\C,-1.2799327267,3.0  
682779579,0.350403229\C,-1.2680803277,4.4241638594,0.0282623497\H,-2.1  
662472587,5.0325114637,0.1847202796\C,-0.1217291745,5.065772649,-0.524  
6554914\C,1.0294805326,4.2696047567,-0.8661113621\C,2.1615498219,4.925  
9876513,-1.4369921698\H,3.0542825063,4.339908103,-1.6756704158\C,2.149  
6211306,6.2936540616,-1.6696453441\H,3.033348223,6.7781686067,-2.09941  
43351\C,1.0061922564,0.704152749,-1.3488467751\H,1.0100311292,8.152198  
8655,-1.5430034286\C,-0.1056745141,6.4687674997,-0.7845923071\H,-0.992  
5735963,7.0585778838,-0.5259713265\C,-5.3736760261,-4.1342952278,-0.48  
03622331\C,-4.8735877025,-2.9058079501,-0.9470323709\H,-5.4710479699,-  
2.2874529691,-1.621805996\C,-3.6071827059,-2.4736024089,-0.5513886777\  
H,-3.225743981,-1.5134772911,-0.909851603\C,-2.8350319439,-3.264046739  
4,0.329912583\C,-3.3551135556,-4.4826781112,0.8131006191\H,-2.76422023  
65,-5.1024037386,1.4935595035\C,-4.6155361364,-4.9249417047,0.39665853  
56\H,-5.0061391153,-5.8814039854,0.7545526955\C,-1.5241820383,-2.76625  
14535,0.808555597\C,-1.2569119253,-2.759805013,2.2786974963\H,-0.25713  
68406,-2.3643073472,2.5064505403\H,-1.3553193258,-3.7891624364,2.66896  
55457\H,-2.0292164485,-2.1528057522,2.7840406028\N,-0.6078629995,-2.27  
45549607,0.0123892065\H,0.2107779014,-1.7643279464,0.5211451561\C,-0.5  
087278093,-2.2838711057,-1.410284022\C,0.2012566996,-1.2220497196,-2.0  
031398841\H,0.5910616709,-0.4160032243,-1.3756450611\C,0.3978402808,-1  
.2104701536,-3.3892482481\H,0.9451330226,-0.3809573301,-3.8458979945\C  
,-0.104075869,-2.2527571795,-4.1828178602\C,-0.795316347,-3.3186895409  
,-3.5820101764\H,-1.1692069451,-4.1466008539,-4.193374788\C,-0.9956970  
086,-3.3460749166,-2.1968880493\H,-1.500167325,-4.1961340157,-1.731804  
006\H,0.0527366892,-2.2418062863,-5.2663863044\C,-6.7585671751,-4.5657  
752488,-0.8971783368\Si,-2.9558039277,2.2245412854,0.6747940435\Si,4.6  
75804171,-0.9579900936,0.6907190347\C,6.5310917984,-0.9694188881,0.247  
6307367\C,7.4768642324,-0.1378345235,0.891307888\C,7.0014893148,-1.818  
8406299,-0.7835317092\C,8.8297777937,-0.1447081946,0.5161203539\H,7.16  
18586654,0.5234686254,1.7062429083\C,8.3523130876,-1.8271400105,-1.165  
7133804\H,6.3028629248,-2.4938378313,-1.2930026611\C,9.2709911784,-0.9  
875640596,-0.5163642262\H,9.5417811239,0.5079170321,1.0344001207\H,8.6  
886125193,-2.4944308787,-1.9676159228\H,10.3270646482,-0.9944198743,-0  
.8091577223\C,4.0491341456,-2.7173000481,0.3688111621\C,2.9543356885,-  
2.9826483362,-0.4812008683\C,4.6888471441,-3.8191138616,0.9864157469\C  
,2.502751748,-4.29319177,-0.7013390486\H,2.4422690855,-2.1521617139,-0  
.9753953365\C,4.2400765718,-5.1321187237,0.7738261913\H,5.5525564563,-  
3.6533664506,1.6428317151\C,3.142844647,-5.3716467192,-0.0702690339\H,  
1.6489424225,-4.4687954757,-1.3656011064\H,4.7483708563,-5.9696763607,  
1.2652299401\H,2.7922330667,-6.3964674307,-0.2381306565\C,4.4453269962  
,-0.4827902987,2.5084177182\C,3.9094885238,-1.4027698086,3.4363368769\  
C,4.7663193494,0.8140826336,2.9753579458\C,3.7059711892,-1.0469357202,  
4.779438998\H,3.6258015793,-2.407519247,3.1044125984\C,4.5670135985,1.

1741354327,4.3151192483\H,5.1486695782,1.5683805953,2.2778097926\C,4.0  
352965479,0.2426576274,5.2223796392\H,3.279917198,-1.7763549253,5.4778  
740725\H,4.8148434706,2.1878631022,4.6501146302\H,3.8705227766,0.52531  
91916,6.2684186724\C,-3.4552005398,1.3478599229,-0.9357278052\C,-4.818  
243993,1.0555405541,-1.1896913007\C,-2.510605913,0.9749657726,-1.91919  
74791\C,-5.2179226095,0.410309686,-2.3701210118\H,-5.5845621701,1.3474  
11461,-0.4615485311\C,-2.9051742183,0.3253904799,-3.0999506036\H,-1.44  
77527029,1.1900074422,-1.7684735236\C,-4.2599863211,0.0394599799,-3.32  
7635081\H,-6.2789420969,0.1971223916,-2.5425408236\H,-2.1505602207,0.0  
401001846,-3.8402350412\H,-4.5687473596,-0.4687847649,-4.2479467877\C,  
-4.2355123784,3.5954342498,0.9899405021\C,-4.8215347238,4.30564458,-0.  
0854361421\C,-4.6125059085,3.9575332159,2.3036761213\C,-5.7461370876,5.  
.3367315416,0.1415793872\H,-4.5537449208,4.0482447268,-1.1174851012\C,  
-5.5358262667,4.9895378271,2.5363152331\H,-4.1827249938,3.4235971715,3.  
.1600584883\C,-6.1055215444,5.68049567,1.4550425335\H,-6.1883727416,5.  
8711199785,-0.7070589315\H,-5.8142522271,5.251799744,3.5634285652\H,-6.  
.8293521934,6.4835237927,1.6348783466\C,-3.0478603654,1.0432876077,2.1  
466030675\C,-2.2344172626,1.2259656646,3.2864169439\C,-4.0455107278,0.  
0398172279,2.1937190493\C,-2.4157637971,0.4411681563,4.4365723391\H,-1.  
.4322511592,1.969312326,3.2732503208\C,-4.2352719958,-0.7406684197,3.3  
441360341\H,-4.6858083291,-0.1392013396,1.3222951529\C,-3.4214659282,-  
0.5370250177,4.4721244644\H,-1.7615366706,0.5906358489,5.3026863384\H,  
-5.0119490598,-1.513893327,3.3570671348\H,-3.5644538505,-1.1478578361,  
5.370742017\F,-7.0044819935,-4.282488372,-2.2026601933\F,-7.7218097665  
,-3.9276784169,-0.77323468\F,-6.9602648985,-5.894787568,-0.7297825247  
\Version=ES64L-G09RevD.01\State=1-A\HF=-4311.4145377\RMSE=3.976e-09\R  
MSF=4.296e-06\Dipole=-2.3290236,-3.1083721,-2.9164316\Quadrupole=-17.6  
301035,17.5149546,0.1151488,1.6818842,-14.0308121,-9.0743137\PG=C01 [X  
(C71H53F3N1O4P1S12)]\@

### TRIFP/3 Type I E

1\1\GINC-LOGIN\FOpt\RTSPSTPSS\def2SVP\W06\C51H32F12N1O4P1\JHIOE\13-Nov  
-2015\0\#p solstps\def2svp/w06 densityfit empiricaldispersion=gd3 op  
t scrf=(smd,t solvent=ch2cl2,read)\title\0,1\p,-0.1637083399,0.2644320  
671,1.235079802\O,1.0625150942,1.2128888037,1.8956356285\O,-0.42784670  
36,1.2243874169,-0.1444700053\O,-1.3383583115,0.3068689875,2.166493813  
4\O,0.4354696614,-1.0204059316,0.6811076413\C,1.6780656237,2.930689923  
4,0.3419393519\C,1.9978749966,1.7583151396,1.0363634467\C,3.236332143,  
1.0640665648,0.850094724\C,4.1993255466,1.6426155379,0.0340639362\H,5.  
1570673661,1.1331846653,-0.1181290924\C,3.9556958673,2.8643340407,-0.6  
54000441\C,2.6615003889,3.4968575692,-0.5486331994\C,2.3998178227,4.62  
66872784,-1.382554034\H,1.4093421219,5.0887728775,-1.3628046864\C,3.37  
6714212,5.1406049028,-2.2226638501\H,3.1479819363,6.0079418043,-2.8515  
298556\C,4.6671262979,4.5493187052,-2.2811575225\H,5.4317231466,4.9698  
000101,-2.9432357505\C,4.9440962224,3.4277802535,-1.5165819674\H,5.924  
0562596,2.9410104845,-1.5747512571\C,0.27629732,3.4413583372,0.4188058  
993\C,-0.7495460306,2.5424022265,0.1079780156\C,-2.1310632118,2.912419  
4994,0.0656192461\C,-2.4669993777,4.221553521,0.3854727925\H,-3.515095  
0734,4.5385301782,0.3545626459\C,-1.4736478507,5.1719949632,0.76117158  
\C,-0.0825971255,4.7839005922,0.795010577\C,0.8764031424,5.7417317399,  
1.2421122167\H,1.9284581403,5.4493768677,1.3100765958\C,0.4915065159,7.  
.025875472,1.5983783427\H,1.2452565558,7.7426348686,1.9422016767\C,-0.  
8722788157,7.4179019545,1.5276984125\H,-1.1617923532,8.4368930041,1.80  
63315262\C,-1.8332137443,6.5057523904,1.1220796665\H,-2.8903821746,6.7  
912147168,1.080866771\C,3.1879421513,-0.4633656105,-3.5307787181\C,3.0  
439794074,-1.8070281201,-3.9418158021\H,3.8159534889,-2.2634452313,-4.  
5712723823\C,1.9367402421,-2.5681704742,-3.5591699019\H,1.8604015124,-  
3.6103637944,-3.8839014681\C,0.9486942254,-2.0134663304,-2.7119938535\  
C,1.0769709583,-0.6639528855,-2.3104672287\H,0.3073934509,-0.194503095  
4,-1.6956445333\C,2.1739280801,0.0949493992,-2.7233803485\H,2.24589352  
21,1.1408515946,-2.4063008602\C,-0.1892245715,-2.8396261099,-2.2729205  
766\C,-0.7928688798,-3.8244005908,-3.2269209313\H,-1.8583980067,-3.989  
6137045,-3.0056713957\H,-0.2714467824,-4.7966445997,-3.1552551017\H,-0.  
.6809243611,-3.4559179515,-4.2573723428\N,-0.652999061,-2.6593231518,-  
1.0556848797\H,-0.1668122318,-1.9359894715,-0.4158370015\C,-1.73321706  
02,-3.3170161725,-0.3926480651\C,-2.5513878573,-2.5252695435,0.4381457  
359\H,-2.3583113654,-1.4560039294,0.55165134\C,-3.6196060111,-3.116329  
9249,1.1221573068\H,-4.2629155701,-2.4913187755,1.7494886724\C,-3.8647  
661694,-4.4933865459,0.999548216\C,-3.0219638452,-5.283655204,0.202341

8508\H,-3.1884758609,-6.363256384,0.1260689726\C,-1.951362982,-4.70460  
91772,-0.492349919\H,-1.274029298,-5.3331082843,-1.0744126396\C,-3.142  
893796,1.8794446069,-0.2829692932\C,-4.288867664,1.6909157243,0.509250  
0201\C,-2.9423934166,1.0312239346,-1.3939447225\C,-5.2032118082,0.6688  
491084,0.2031564005\C,-3.8549578377,0.0117040213,-1.6849723363\C,-4.99  
31268155,-0.1847722566,-0.8866607211\C,3.3771639015,-0.3213386082,1.37  
42215167\C,3.6531797575,-1.3552482045,0.4586269228\C,3.1182707456,-0.6  
558125817,2.7155606945\C,3.6460777812,-2.6930064095,0.8716859345\C,3.1  
308152795,-1.9983416953,3.123054189\C,3.3840022956,-3.0291185728,2.207  
9400727\H,-4.7015634268,-4.952595627,1.5363217361\C,4.4026843414,0.341  
9385656,-3.9197100946\H,5.1901683732,0.2373714473,-3.1482572685\H,4.83  
02531961,-0.0068952895,-3.8748961229\H,4.1665113554,1.4159512522,-4.00  
27577545\H,3.8124547631,-1.114485035,-0.5954897266\H,-2.064225789,1.16  
54919424,-2.0280808309\H,2.8926330578,0.1293878445,3.4407719371\H,3.37  
11251895,-4.0741761177,2.5276346557\H,-4.4518052572,2.3225314677,1.387  
142687\H,-5.6961919649,-0.9930624636,-1.1035392732\C,2.7825103554,-2.3  
27713,4.553094602\C,3.8023818157,-3.7862738361,-0.1539002338\C,-6.3740  
626807,0.4308762254,1.1236260815\C,-3.6300630488,-0.8908899145,-2.8728  
207908\H,4.5342140109,-3.3914471718,-1.2261082851\F,2.5924537479,-4.19  
31555029,-0.6415799289\F,4.3986762774,-4.8934835278,0.3546835276\F,3.2  
256545826,-3.5541660398,4.9266829168\F,1.4364031285,-2.3204667804,4.75  
59630765\F,3.3065996772,-1.4292855422,5.4263805414\F,-3.8985038761,-2.  
1924774665,-2.57888782\F,-2.3494417949,-0.8453217076,-3.3255678511\F,-  
4.4274718703,-0.5644153996,-3.9240750376\F,-6.0253376259,-0.3410461046  
2.1935707171\F,-7.3970025375,-0.2077239752,0.504322276\F,-6.869034817  
3,1.5867973269,1.6320847946\Version=ES64L-G09RevD.01\State=1-A\HF=-38  
56.0572681\RMSD=3.018e-09\RMSF=3.599e-06\Dipole=1.1489377,-0.9342898,-  
4.8076557\Quadrupole=-4.7884876,26.9677273,-22.1792396,11.9946418,-11.  
8229209,13.8249233\PG=C01 [X(C51H32F12N1O4P1)]\@

### TRIFP/3 Type II E

1\1\GINC-WORKER1\FOpt\RTSPSS\def2SVP/W06\C51H32F12N1O4P1\JHIOE\19-J  
un-2017\0\#p tpsstps\def2svp/w06 densityfit empiricaldispersion=gd3  
opt scrf=(smd,solvent=ch2cl2,read)\title\0,1\P,0.3888554685,0.310120  
7394,1.0211423233\O,1.798110945,0.9682465691,1.6755776901\O,0.25946252  
31,1.3741654303,-0.2992965595\O,-0.7157083486,0.5083146069,2.015642409  
2\O,0.7126926199,-1.0360618708,0.3833701238\C,2.6737921541,2.611318264  
8,0.1686169326\C,2.7948866792,1.3725632574,0.808141074\C,3.8862530789,  
0.4792454154,0.5618900379\C,4.8936677817,0.8948639967,-0.3000078284\H,  
5.7419143428,0.231298496,-0.5001325727\C,4.8394553922,2.1544379723,-0.  
9598432454\C,3.7004572842,3.0188018939,-0.7568909422\C,3.6197988027,4.  
215703728,-1.5321375495\H,2.7436047551,4.8618747871,-1.4302119677\C,4.  
6279368935,4.5642285955,-2.4190388159\H,4.5403458771,5.487009244,-3.00  
29342493\C,5.7684044738,3.7330589287,-2.5836526104\H,6.5593859988,4.02  
32930964,-3.2835665217\C,5.8656189633,2.5492112164,-1.8708440973\H,6.7  
274964047,1.8859958865,-2.0051052165\C,1.4036523758,3.3757242817,0.350  
9608541\C,0.2117532404,2.7101468069,0.052760595\C,-1.0728712235,3.3311  
483675,0.1351007325\C,-1.1413589711,4.642005052,0.5859203743\H,-2.1126  
513404,5.1437110675,0.6566990728\C,0.0345499486,5.3597501931,0.9538221  
93\C,1.3284933326,4.7268265391,0.8417335586\C,2.4790978649,5.457336340  
1,1.2653004723\H,3.4612673381,4.9776480487,1.216863462\C,2.3656276417,  
6.7538450282,1.7452046932\H,3.2626826925,7.2939488423,2.0672163378\C,1  
.095756671,7.3854789618,1.8282994228\H,1.0203988973,8.4111540791,2.205  
2953834\C,-0.0448057514,6.6977660881,1.4451971451\H,-1.0312813424,7.16  
94549368,1.5188689518\C,-4.690966142,-2.5725425675,0.4801831977\C,-4.8  
032292267,-3.0726959764,-0.8359286785\H,-5.7610975738,-3.4799525094,-1  
.1780802397\C,-3.7203983294,-3.0516060362,-1.7148319633\H,-3.861283934  
5,-3.4421964724,-2.7254333379\C,-2.46229741,-2.5348866234,-1.309704623  
9\C,-2.3455212519,-2.0529027273,0.0190040892\H,-1.3944848962,-1.669883  
0281,0.396810177\C,-3.4386769146,-2.0625088405,0.8849366394\H,-3.31457  
37803,-1.6581602087,1.8945705959\C,-1.3410749993,-2.4994683151,-2.2612  
800282\C,-1.5367646927,-2.9725955996,-3.6715429137\H,-0.7276337712,-2.  
6253333835,-4.3289458311\H,-2.495966833,-2.601278757,-4.0611468819\H,-  
1.5665622149,-4.0766203732,-3.6999307407\N,-0.1705487858,-2.027266925,  
-1.883119367\H,-0.0098564554,-1.6183144507,-0.9047834881\C,1.041848570  
3,-1.9575298665,-2.6414836498\C,1.7116681818,-0.7200235249,-2.67936284  
6\H,1.2715237336,0.14942746,-2.1829604328\C,2.939325325,-0.6255159522,  
-3.3467291876\H,3.4602113375,0.3368798247,-3.3809436814\C,3.5027871337  
,-1.75860034,-3.9567509029\C,2.8357952989,-2.9925214146,-3.896614071\



H,3.283875685,-3.8838844871,-4.347531696\C,1.6035889863,-3.1003000291,  
-3.2373840378\H,1.0976074406,-4.0659995467,-3.153581307\C,-2.269831026  
2,2.5462542096,-0.2710924172\C,-3.3710103636,2.3834058881,0.5865298368  
\C,-2.2964784321,1.9221587547,-1.5344929739\C,-4.4723041086,1.60884565  
59,0.1838501115\C,-3.4041100597,1.1622902425,-1.9302704823\C,-4.502385  
5589,0.9932877952,-1.0743595578\C,3.8579453319,-0.9002615961,1.1146330  
938\C,4.0439745049,-1.9912833544,0.242779373\C,3.5886681108,-1.1564853  
484,2.4718071345\C,3.9547547576,-3.3057764433,0.7185045158\C,3.5099799  
863,-2.4766715797,2.939543177\C,3.6863425425,-3.5625137216,2.071480491  
6\H,4.4683413825,-1.6827760721,-4.4679221745\C,-5.8791629114,-2.574159  
5294,1.4074091682\H,3.6152277058,-4.5883204596,2.4416797978\H,3.439583  
1203,-0.3251117588,3.1644284238\H,4.2210329124,-1.8080847461,-0.820493  
2117\H,-1.445994835,2.0358758632,-2.2114723949\H,-5.3570533713,0.38505  
13679,-1.3781835773\H,-3.3551156348,2.8372334128,1.5817421008\C,-5.602  
2865101,1.3982675478,1.1603395605\C,-3.4139695492,0.5670012644,-3.3151  
400324\C,3.1739189802,-2.7152854768,4.3906894786\C,4.0607689095,-4.458  
0602452,-0.2484553657\F,1.8436646239,-2.5584603345,4.6325528516\F,3.81  
76505584,-1.8456260143,5.2118497962\F,3.4992684149,-3.9667062332,4.799  
7158786\F,4.791656364,-4.1460480553,-1.348326493\F,2.8354017568,-4.854  
2999801,-0.6975414745\F,4.6317222124,-5.5523907156,0.3160363513\F,-6.6  
931986474,0.8343691703,0.5831912921\F,-5.2365055867,0.5817108881,2.188  
3780972\F,-6.0076117009,2.5638516749,1.7272325657\F,-3.7618940759,1.48  
16804361,-4.2599693401\F,-4.284273824,-0.4659732699,-3.4366018487\F,-2  
.1853717823,0.0996235444,-3.6744978052\H,-6.6403239103,-1.8519717173,1  
.0593341499\H,-6.3615968665,-3.5679481476,1.4262720803\H,-5.5938635452  
,-2.2979400528,2.4347225772\\Version=ES64L-G09RevD.01\State=1-A\HF=-38  
56.0592733\RMSD=3.449e-09\RMSF=6.023e-06\Dipole=-0.831674,-0.871883,-4  
.5809374\Quadrupole=9.7181999,10.8022289,-20.5204288,22.3080329,-5.789  
4055,18.451608\PG=C01 [X(C51H32F12N1O4P1)]\@

### TRIFP/3 Type I Z

1\1\GINC\LOGIN\FOpt\RTPSSTPSS\def2SVP/W06\C51H32F12N1O4P1\JHIOE\18-Nov  
-2015\0\#p tpsstps\def2svp/w06 densityfit empiricaldispersion=gd3 op  
t scrf=(smd,solvent=ch2cl2,read)\title\0,1\P,-0.9416760398,-0.988703  
1137,-0.8337833621\O,-1.9920996286,0.1422353534,-1.5067235185\O,0.3943  
197057,0.0342271271,-0.5915043574\O,-0.6908033578,-2.0191017196,-1.894  
6314265\O,-1.3618200077,-1.3331955129,0.593259075\C,-1.1956066325,2.32  
94931558,-0.9671587037\C,-2.1748427684,1.3396387044,-0.8442227407\C,-3  
.3624472018,1.5134308399,-0.0612846331\C,-3.5314995666,2.7230434324,0.  
6041834794\H,-4.4401147359,2.8968455954,1.1902884288\C,-2.5472594116,3  
.7489342425,0.5598198073\C,-1.3426525725,3.5474213378,-0.2076074935\C,  
-0.3187496429,4.5389059423,-0.1231471868\H,0.6258355511,4.3791176029,-  
0.6496570009\C,-0.497925797,5.689844525,0.6302924385\H,0.3060025155,6.  
4320844506,0.6841615918\C,-1.7095272776,5.9123091707,1.3377844644\H,-1  
.8413145227,6.8306999935,1.9199208731\C,-2.7103567168,4.95516736,1.306  
6690198\H,-3.6388447277,5.0994910141,1.8706234266\C,0.0085636282,2.070  
4640147,-1.8071472635\C,0.7830421644,0.9308142967,-1.5616696468\C,2.04  
0698519,0.7102542477,-2.2072154478\C,2.4867086591,1.6391401587,-3.1370  
149638\H,3.4567057353,1.4936771993,-3.6247527531\C,1.6878431934,2.7583  
024685,-3.5083664676\C,0.4205862891,2.9725402553,-2.8536851945\C,-0.38  
54873046,4.0683975936,-3.2871673558\H,-1.3651512154,4.2251082019,-2.82  
67219139\C,0.0490191539,4.9237533092,-4.2887994251\H,-0.5913720949,5.7  
528878171,-4.6092181454\C,1.3124913897,4.7295989839,-4.9089799253\H,1.  
6453033919,5.4153612789,-5.6956019172\C,2.1112152549,3.6634302905,-4.5  
277445672\H,3.0796053449,3.4908397843,-5.0108976943\C,4.2958794875,2.7  
859258076,3.2929262112\C,4.2883435568,1.7198562573,2.3636402393\H,5.20  
04869644,1.4845851591,1.8055290012\C,3.1401960576,0.9614262363,2.14489  
23332\H,3.160628875,0.151816275,1.4113670072\C,1.9417356845,1.25758386  
83,2.8413009245\C,1.9330156856,2.3410630231,3.7477073149\H,1.017492589  
.2.5937862112,4.2909449851\C,3.1000396705,3.0763486354,3.9812844796\H,  
3.0804474538,3.8987221868,4.7048309249\C,0.7010107073,0.5335705872,2.5  
279283709\C,-0.5914443795,1.2843500161,2.4648120483\H,-1.3736784789,0.  
6824516957,1.9797033324\H,-0.4590008914,2.241682873,1.9389835972\H,-0.  
9117422989,1.5171379743,3.498812199\N,0.6567335672,-0.7513862306,2.245  
3538696\H,-0.2230677276,-1.067758869,1.7207994129\C,1.6496865202,-1.75  
94267685,2.4220002109\C,1.715796091,-2.7939758181,1.470718263\H,1.0415  
800608,-2.7971843025,0.6100526276\C,2.6659529751,-3.8121057369,1.62917  
57772\H,2.7217931287,-4.6123708122,0.8864703334\C,3.542082349,-3.80285  
85633,2.7239440777\C,3.4470786422,-2.7826421731,3.6858168048\H,4.11050

3798,-2.7831202976,4.556909903\C,2.4975092034,-1.7655641632,3.54757399  
92\H,2.4100784217,-0.98434576,4.3071910229\C,2.8718305309,-0.471147513  
,-1.8338030905\C,2.4460727278,-1.7810694357,-2.119064233\C,4.100369999  
4,-0.2792364327,-1.1742518724\C,3.2564773833,-2.8733840504,-1.76992939  
54\C,4.8780677209,-1.3814567482,-0.7912879078\C,4.4700478124,-2.688037  
8339,-1.0960467164\C,-4.3614729072,0.4204646863,0.0739374582\C,-4.9377  
673737,0.1496904793,1.3330359867\C,-4.7717451129,-0.3519423284,-1.0316  
702034\C,-5.8973990662,-0.8605973972,1.4771868478\C,-5.7297371896,-1.3  
642115305,-0.8746599918\C,-6.3022858869,-1.6299462923,0.375862993\H,4.  
2885938578,-4.5959185513,2.8362498883\C,5.5551802903,3.5813346877,3.52  
82967386\H,5.9534291048,3.9758821434,2.5758074922\H,5.381394206,4.4271  
130576,4.2133137925\H,6.3438896167,2.9391562877,3.9632681666\H,-7.0525  
986616,-2.4167700785,0.4895917299\H,-4.6235151192,0.722983122,2.209317  
7956\H,-4.3522375773,-0.1563458402,-2.0202512097\H,5.0813473567,-3.544  
6158594,-0.8028771754\H,4.434782391,0.7340996515,-0.9360176594\H,1.473  
2395165,-1.9469896984,-2.5921986891\C,-6.4842180122,-1.1650231653,2.83  
39930349\C,-6.1154680837,-2.200736972,-2.0702296735\C,2.7730944008,-4.  
2615887056,-2.1093421519\C,6.1082344497,-1.1706492824,0.052871093\F,-7  
.3497468998,-2.7485156919,-1.9389643196\F,-5.2502341387,-3.2325256831,  
-2.2654994088\F,-6.1174262589,-1.476938542,-3.2184334921\F,-7.82686079  
33,-1.3623310541,2.7698625683\F,-6.2678244681,-0.1699055024,3.72872574  
82\F,-5.9566812581,-2.2977904476,3.373368153\F,2.5454600916,-4.4059974  
535,-3.4406185872\F,1.5972235613,-4.556078413,-1.4877926376\F,3.656294  
6886,-5.2255771611,-1.7481209359\F,7.079013689,-2.0809357136,-0.202805  
387\F,5.8180198387,-1.2795658849,1.3836141603\F,6.6542255868,0.0607464  
342,-0.1187526808\Version=ES64L-G09RevD.01\State=1-A\HF=-3856.0538926  
\RMSD=4.713e-09\RMSF=2.869e-06\Dipole=3.8480674,4.977025,4.1971907\Qua  
drupole=-9.0729751,3.6822496,5.3907255,-7.5798672,4.9477221,-1.240488\  
PG=C01 [X(C51H32F12N1O4P1)]\@

### TRIFP/3 Type II Z

1\1\GINC-LOGINFOpt\RTSPSTPSS\def2SVP/W06\C51H32F12N1O4P1\JHIOE\21-Nov  
-2015\0\#p tpsstps\def2svp/w06 densityfit empiricaldispersion=gd3 op  
t=tight scrf=(smd,solvent=ch2cl2,read)\title\0,1\p,-0.9351885303,-0.  
5163437398,-1.2125985817\O,-2.003332502,0.7388314061,-1.5363712634\O,0.  
.3141816123,0.3957939328,-0.4993701008\O,-0.5250337728,-1.0899585839,-  
2.5365989574\O,-1.4594623005,-1.3547930788,-0.0489206912\C,-1.42390995  
22,2.5864939856,-0.1430003655\C,-2.3175546481,1.5658824286,-0.47452773  
\C,-3.5228805541,1.311852691,0.2546773127\C,-3.8230841452,2.1465746623  
,1.3239809796\H,-4.7453438608,1.9887739015,1.8932866327\C,-2.952241054  
9,3.2004134966,1.717793995\C,-1.7171810337,3.4152155927,1.0028438624\C  
,-0.8148719654,4.4003885503,1.5057934115\H,0.1490059213,4.5462196003,1  
.0121361948\C,-1.1342371933,5.1637630936,2.6195406099\H,-0.4207298701,  
5.9091558214,2.9872900851\C,-2.3710607315,4.9811256563,3.2934401007\H,  
-2.612216478,5.5935214275,4.168866721\C,-3.2576200128,4.0124975622,2.8  
519301721\H,-4.2036946077,3.840270121,3.3771772271\C,-0.1541678232,2.7  
170011125,-0.9179130643\C,0.6979562211,1.6084985921,-1.0304370734\C,2.  
0144644479,1.7151423897,-1.5901364505\C,2.420025059,2.9479380663,-2.09  
15837639\H,3.4229751644,3.0512613422,-2.5198738653\C,1.5513153313,4.07  
36903749,-2.1119208783\C,0.2362884732,3.9602594357,-1.5323806427\C,-0.  
6366551234,5.0871720035,-1.6151508717\H,-1.6522027537,5.0070411332,-1.  
2167939167\C,-0.2196185498,6.2717430565,-2.2038671352\H,-0.9097611735,  
7.1205640469,-2.2609572174\C,1.0900279662,6.3921625282,-2.7421547108\H  
,1.4072390269,7.3356408877,-3.1992420648\C,1.9540204006,5.3100776455,-  
2.7017711789\H,2.9600319137,5.381788868,-3.1301725353\C,5.4613815999,-  
1.7980743064,2.7210766541\C,4.5851873589,-0.6984313538,2.5922383553\H,  
4.9657218138,0.3151929647,2.7530231193\C,3.2461616271,-0.8768767493,2.  
2448923271\H,2.6013672794,-0.0020821285,2.1242431877\C,2.7366367341,-2  
.1752224328,1.9974741328\C,3.6164317532,-3.2792958786,2.0967900831\H,3  
.2507297097,-4.291568734,1.9000123874\C,4.9483318425,-3.0897520095,2.4  
711403457\H,5.6096111866,-3.9585879325,2.5619864074\C,1.3666715683,-2.  
3548201802,1.4991558266\C,1.0802017937,-3.4193751641,0.4843986076\H,0.  
1703239513,-3.1847258339,-0.0894365486\H,0.9021866897,-4.3674771058,1.  
0290314966\H,1.9358728649,-3.5770786567,-0.1836732311\N,0.3545413257,-  
1.5951732124,1.8635062087\H,-0.4809252444,-1.5855080373,1.1871405305\C  
,0.2485693523,-0.7042178119,2.972769433\C,-0.4317457273,0.5122653945,2  
.7857256432\H,-0.8274579088,0.7642694836,1.7986445587\C,-0.5705390296,  
1.3944749103,3.8655780238\H,-1.0875442848,2.3471597295,3.7163593662\C,  
-0.0517352386,1.059599389,5.1255686489\C,0.5988769812,-0.1726510887,5.

309984972\H,0.9849873339,-0.4497518702,6.2965979825\C,0.7486460698,-1.0616385936,4.2399577965\H,1.2420307294,-2.0269584936,4.3839455935\C,2.9690647915,0.5696065687,-1.5888703354\C,2.6185674588,-0.7009678338,-2.0976365336\C,4.2762585315,0.7669000933,-1.1034645612\C,3.5689732448,-1.7297736159,-2.1229880676\C,5.2164030906,-0.2767685752,-1.1310615431\C,4.8724711632,-1.5342473922,-1.6371054581\C,-4.3770311568,0.1410233817,-0.0742314846\C,-4.8310129717,-0.6973565349,0.9656467429\C,-4.7324013894,-0.1748095744,-1.3988405534\C,-5.6167431648,-1.820387043,0.6826564397\C,-5.5206925315,-1.3043004012,-1.6711508767\C,-5.9670959221,-2.1385169203,-0.6395515537\H,-0.1631824128,1.7526291632,5.9661088418\C,6.915896091,-1.5984757628,3.0632473303\H,7.0921427251,-0.6139827736,3.5269801468\H,7.2789387884,-2.3864165642,3.7456733266\H,7.5292347079,-1.6516683102,2.144614241\H,1.6077207091,-0.8825466857,-2.4793671652\H,5.6026792271,-2.3474491575,-1.6521296991\H,4.5592641355,1.7380252478,-0.686399013\H,-4.5441160469,-0.4823389664,1.9982975428\H,-4.3978187896,0.4620163946,-2.2207066998\H,-6.5762170828,-3.0190776077,-0.860214878\C,3.228273522,-3.0731180351,-2.719739955\C,6.616196454,-0.0131588286,-0.6339508387\C,-6.0715692685,-2.7377763325,1.7906618607\C,-5.8476899625,-1.6279575724,-3.1086999728\F,-6.2472775921,-0.5266666414,-3.7971487361\F,-6.8344815679,-2.5503206154,-3.2228011713\F,-4.7681003171,-2.1231825408,-3.7718690029\F,-5.8035898542,-2.2430809057,3.0230155085\F,-7.4101558157,-2.9706018537,1.7360316177\F,-5.4703746554,-3.9565192983,1.7148925265\F,7.3150721827,-1.1570604332,-0.421993124\F,6.623172224,0.6820920179,0.5349417227\F,7.3362306827,0.7276396937,-1.51946582\F,3.6294790618,-4.0975263511,-1.9100670045\F,3.8554626421,-3.2699475168,-3.9112391777\F,1.9054100353,-3.2357912246,-2.9373157761\Version=ES64L-G09RevD.01\State=1-A\HF=-3856.0558434\RMSE=9.974e-09\RMSEF=2.600e-06\Dipole=3.5574558,1.4258591,5.2550124\Quadrupole=-8.5288331,15.5613181,-7.032485,-20.2393082,2.9302824,-10.6286901\PG=C01 [X(C51H32F12N1O4P1)]\@

#### TRIFP/5 Type I E

1\1\GINC-LOGINFO\RTSPSS\def2SVP/W06\C51H32F12N1O5P1\JHIOE\13-Nov-2015\0\#p solstps\def2svp/w06 densityfit empiricaldispersion=gd3 opt scrf=(smd, solvent=ch2cl2,read)\title\0,1\P,-0.1889551844,0.3161296741,1.2665949421\O,1.2034001685,0.8975044747,2.0211841212\O,-0.0889567674,1.3118734599,-0.1120238829\O,-1.3632004369,0.6828852497,2.123940024\O,0.0742141977,-1.0837935587,0.73145014\C,2.3436656379,2.423511932,0.5667160135\C,2.304422995,1.2003052658,1.2453779686\C,3.3439381489,0.221222646,1.128739419\C,4.4901751516,0.5576389596,0.4202647578\H,5.3035933206,-0.1705213211,0.3301794313\C,4.6153067878,1.8129662594,-0.2399660777\C,3.5072357212,2.7388839241,-0.2251199802\C,3.5986688622,3.9048658563,-1.0456198712\H,2.7508470102,4.5931558055,-1.0953658248\C,4.740163507,4.1731483728,-1.7866435894\H,4.7820619068,5.0736601083,-2.4090215271\C,5.8528393987,3.290619446,-1.7494657754\H,6.7522105059,3.5202437825,-2.3309538303\C,5.7857148146,2.1317053002,-0.9936645687\H,6.6239535222,1.4263477094,-0.9793489257\C,1.1143022567,3.2704479283,0.5587945913\C,-0.0802228789,2.6671594324,0.1503755712\C,-1.3136381137,3.3825481637,0.024082953\C,-1.3244146211,4.732061854,0.3536370478\H,-2.251259136,5.3082271647,0.2579830467\C,-0.1528547711,5.3908149058,0.8269585081\C,1.083898522,4.6553784458,0.9509454836\C,2.2181049754,5.3250556616,1.5004938247\H,3.1491050039,4.7677764086,1.6398133792\C,2.1502707298,6.6607245223,1.868189106\H,3.0327036686,7.1525834362,2.2918844267\C,0.9444140842,7.3946075782,1.7069733778\H,0.9065477075,8.4505669033,1.995712156\C,-0.1838128913,6.7683063312,1.2019761745\H,-1.1248062428,7.319075426,1.09227981\C,2.8140141533,-1.4929156525,-3.6192801541\C,2.2632854672,-2.7197633285,-4.0638076177\H,2.8458979747,-3.3363081043,-4.7548396024\C,1.0131934952,-3.1288745695,-3.6175289938\H,0.6179776632,-4.0894199184,-3.9609369595\C,0.2809178759,-2.3458490171,-2.6844184965\C,0.8346974412,-1.1120005449,-2.2659112472\H,0.281907116,-0.4606792703,-1.5872576424\C,2.0771517214,-0.680665566,-2.7266333425\H,2.4618492369,0.2848053601,-2.3909145093\C,-1.0111154291,-2.8170512129,-2.1832704965\C,-1.874342364,-3.682667134,-3.0527700323\H,-2.9353349504,-3.5952114183,-2.7753425077\H,-1.5799798833,-4.7431580487,-2.9506696353\H,-1.7457312538,-3.3957085432,-4.1072304437\N,-1.3989560212,-2.4442929752,-0.97880222\H,-0.7434711975,-1.844507186,-0.3716252724\C,-2.6076473576,-2.769806264,-0.2899245218\C,-3.2638754521,-1.7277540323,0.3928128353\H,-2.8621893963,-0.7124237639,0.3633731232\C,-4.4386104921,-2.000569129,1.1035784792\H,-4.9564891271,-1.1830789017,1.6147151329\C,-4.9486679618,-3.3080107795,1.1539840001\C,-4.2698703851,-4.348576756,0.500542936\H,-4.6

47819271,-5.3747863761,0.5576873706\C,-3.0954211638,-4.087989487,-0.21  
89176893\H,-2.5455912464,-4.9042781916,-0.6938482062\C,-2.5335627562,2  
.6529659475,-0.4131881327\C,-3.7441943207,2.7855788231,0.2905726293\C,  
-2.4861632707,1.773531199,-1.5164978097\C,-4.8746168216,2.0474918448,-  
0.0960718654\C,-3.6152740398,1.0349108164,-1.8869401324\C,-4.820832891  
7,1.1600642925,-1.1787743872\C,3.0780332903,-1.1645165548,1.5981549741  
\C,3.1220900752,-2.206984231,0.6519401809\C,2.6538109561,-1.4531300816  
,2.907225809\C,2.726490967,-3.5032967644,1.0027223568\C,2.2798969886,-  
2.759974787,3.2545614823\C,2.3022843689,-3.7931653208,2.3080022818\H,-  
5.8670260863,-3.5177225462,1.712554423\H,3.4119803532,-1.9882596122,-0  
.3789735133\H,-1.5593528173,1.6604995434,-2.0815602061\H,2.604087375,-  
0.6565512306,3.6530505175\H,1.9898394339,-4.8045180697,2.5809328009\H,  
-3.7962864605,3.4448076061,1.1614412594\H,-5.6978335697,0.5697993909,-  
1.4570720257\C,1.7738331001,-3.0315994151,4.6493612982\C,2.6420677444,  
-4.5749103283,-0.0541284705\C,-6.1382513225,2.1388446607,0.7230738376\  
C,-3.5528698462,0.087959958,-3.0598213701\F,3.4295853011,-4.3139499538  
,-1.1267019987\F,1.3688649437,-4.7082682814,-0.5315545\F,2.9976278879,  
-5.7963825782,0.4193343639\F,1.9176141346,-4.3326861245,5.0073709929\F  
,0.45023996,-2.7386448711,4.7722119517\F,2.4208061764,-2.2857904489,5.  
581275181\F,-4.184107262,0.5852486783,-4.1558134432\F,-4.152397667,-1.  
1019374567,-2.7800639712\F,-2.2784563751,-0.1935022954,-3.4355408988\F  
,-6.1684282075,1.1998975017,1.7132619067\F,-7.251343998,1.9406144291,-  
0.0265169275\F,-6.2717387949,3.342003714,1.3327296655\O,4.0332575058,-  
1.1792015361,-4.1030601665\C,4.6861014919,0.0063058612,-3.6162798559\H  
,5.6670390761,0.0318158239,-4.1123265661\H,4.1147298117,0.9153861978,-  
3.8762445592\H,4.8220298119,-0.0500151169,-2.5230658194\Version=ES64L  
-G09RevD.0\State=1-A\HF=-3931.2223052\RMSD=7.317e-09\RMSF=3.844e-06\  
ipole=1.4335826,-0.6691282,-4.4555566\Quadrupole=6.8149714,18.8037326,  
-25.6187039,22.4017747,-6.0471869,12.0468056\PG=C01 [X(C51H32F12N1O5P1  
)]\@

## TRIFP/5 Type II E

1\1\GINC-LOGIN\SP\RTSPSS\def2SVP\W06\C51H32F12N1O5P1\JHIOE\25-Nov-2  
015\0\#p tpsstps/def2svp/w06 densityfit empiricaldispersion=gd3 scrf  
=(smd,externaliteration,dovacuum,read,solvent=ch2cl2)\title\0,1\p,0,  
0.154477,0.325372,1.039302\O,0,1.474811,1.193821,1.627518\O,0,-0.15856  
1,1.313007,-0.310909\O,0,-0.939755,0.407095,2.061827\O,0,0.647818,-0.9  
85632,0.440275\C,0,2.076058,2.897108,0.061298\C,0,2.384306,1.703768,0.  
722231\C,0,3.584591,0.966128,0.46504\C,0,4.512637,1.510258,-0.415284\H  
,0,5.444654,0.972039,-0.619383\C,0,4.27223,2.740434,-1.089435\C,0,3.02  
1672,3.432672,-0.885164\C,0,2.760432,4.594236,-1.673691\H,0,1.801112,5  
.108251,-1.5697\C,0,3.700344,5.0756,-2.57311\H,0,3.474624,5.969109,-3.  
165466\C,0,4.948616,4.417943,-2.738908\H,0,5.68339,4.812479,-3.449001\  
C,0,5.222825,3.268902,-2.015181\H,0,6.171017,2.736514,-2.150933\C,0,0.  
71276,3.475535,0.249514\C,0,-0.38102,2.643276,-0.007607\C,0,-1.736524,  
3.091492,0.066701\C,0,-1.976205,4.401676,0.457739\H,0,-3.005259,4.7720  
64,0.518912\C,0,-0.905718,5.281616,0.792401\C,0,0.4597,4.819313,0.6988  
16\C,0,1.503842,5.702847,1.106894\H,0,2.539534,5.351309,1.077464\C,0,1  
.221192,6.987303,1.547276\H,0,2.038666,7.646279,1.85967\C,0,-0.119777,  
7.453731,1.602979\H,0,-0.328716,8.47264,1.94652\C,0,-1.159815,6.614407  
,1.236573\H,0,-2.199128,6.957336,1.292529\C,0,-4.411213,-3.272787,1.06  
817\C,0,-4.570476,-3.878007,-0.20264\H,0,-5.495457,-4.423935,-0.410702  
\C,0,-3.571579,-3.77385,-1.160504\H,0,-3.735391,-4.25013,-2.129934\C,0  
,-2.361873,-3.070521,-0.895558\C,0,-2.21881,-2.482399,0.389754\H,0,-1.  
305578,-1.947166,0.661774\C,0,-3.218445,-2.566656,1.353826\H,0,-3.0657  
26,-2.071807,2.315562\C,0,-1.332625,-2.95452,-1.927714\C,0,-1.549679,-  
3.56458,-3.282878\H,0,-0.850986,-3.154903,-4.025389\H,0,-2.577808,-3.3  
72418,-3.622638\H,0,-1.409258,-4.65925,-3.233855\N,0,-0.216876,-2.2897  
05,-1.679363\H,0,-0.061429,-1.781558,-0.75295\C,0,0.915985,-2.099523,-  
2.530499\C,0,1.40114,-0.785305,-2.67604\H,0,0.879048,0.041203,-2.18529  
1\C,0,2.552607,-0.559442,-3.440442\H,0,2.927395,0.462296,-3.559928\C,0  
,3.224844,-1.635214,-4.044266\C,0,2.743499,-2.943422,-3.879246\H,0,3.2  
78446,-3.787976,-4.325782\C,0,1.58991,-3.183577,-3.120422\H,0,1.234497  
,-4.204318,-2.955368\C,0,-2.823384,2.12796,-0.256102\C,0,-3.854328,1.8  
64876,0.662641\C,0,-2.802103,1.419824,-1.474112\C,0,-4.837774,0.907014  
,0.366469\C,0,-3.791537,0.470206,-1.761266\C,0,-4.816406,0.199957,-0.8  
4303\C,0,3.751884,-0.400783,1.025531\C,0,4.095838,-1.457685,0.158904\C  
,0,3.510278,-0.6906,2.382114\C,0,4.188293,-2.770612,0.638874\C,0,3.610  
775,-2.007791,2.852839\C,0,3.947275,-3.059731,1.990081\H,0,4.130775,-1

.454977,-4.632682\H,0.4.018714,-4.084772,2.362796\H,0,3.241119,0.11144  
5,3.072216\H,0,4.251092,-1.257676,-0.90464\H,0,-2.002755,1.607517,-2.1  
95432\H,0,-5.574038,-0.556142,-1.060621\H,0,-3.864595,2.380382,1.62714  
5\C,0,-5.932126,0.644772,1.369273\C,0,-3.756439,-0.23481,-3.093215\C,0  
,3.289211,-2.30125,4.297391\C,0,4.468093,-3.905693,-0.314351\F,0,1.956  
209,-2.505268,4.485597\F,0,3.642221,-1.280579,5.119054\F,0,3.918345,-3  
.415581,4.749518\F,0,5.077365,-3.492454,-1.453423\F,0,3.322002,-4.5402  
1,-0.693128\F,0,5.261333,-4.857403,0.241969\F,0,-6.535629,-0.554945,1.  
177526\F,0,-5.462085,0.655639,2.646791\F,0,-6.911292,1.587736,1.315433  
\F,0,-4.285518,0.528059,-4.087305\F,0,-4.451776,-1.399934,-3.086033\F,  
0,-2.483859,-0.531192,-3.477856\O,0,-5.431668,-3.429376,1.930288\C,0,-  
5.320464,-2.893221,3.261215\H,0,-6.261351,-3.159729,3.76382\H,0,-4.469  
838,-3.351163,3.797172\H,0,-5.207892,-1.79695,3.241558\\Version=ES64L-  
G09RevD.01\State=1-\HF=-3931.2064307\RMSD=9.221e-09\Dipole=-0.937214,  
-0.9984404,-3.3928952\Quadrupole=-1.321385,15.7038673,-14.3824824,19.1  
537376,-16.7016899,10.6569062\PG=C01 [X(C51H32F12N1O5P1)]\@

### TRIFP/5 Type I Z

1\1\GINC-LOGIN\FOpt\RTPSSTPSS\def2SVP/W06\C51H32F12N1O5P1\JHIOE\18-Nov  
-2015\0\#p tpsstps\def2svp/w06 densityfit empiricaldispersion=gd3 op  
t scrf=(smd,solvent=ch2cl2,read)\title\0,1\P,-1.092999765,1.10664120  
16,0.8012209554\O,-2.0994489197,-0.0063641248,1.5680230264\O,0.2999007  
843,0.1397239101,0.6912290744\O,-0.9220616935,2.2512282156,1.755935140  
5\O,-1.4973186446,1.2801417709,-0.6601503434\C,-1.1809674744,-2.191803  
6676,1.2643450185\C,-2.203765647,-1.2703148354,1.0236837463\C,-3.35602  
2893,-1.5787188221,0.2293274717\C,-3.4462929459,-2.8524092616,-0.32166  
00376\H,-4.3256093862,-3.1250840532,-0.9150446345\C,-2.4136694924,-3.8  
162866375,-0.1568456951\C,-1.246729085,-3.4835379651,0.6231975563\C,-0  
.1745965668,-4.4261417034,0.6599295472\H,0.7423907985,-4.1754182212,1.  
1992582338\C,-0.269736595,-5.645504614,0.0048830017\H,0.5711021044,-6.  
3466808219,0.0422849412\C,-1.4421404049,-5.9906446943,-0.7191704331\H,  
-1.5066546453,-6.9604720019,-1.2240827026\C,-2.490142319,-5.0886584184  
,-0.8005548355\H,-3.3903817311,-5.3288123306,-1.3772685915\C,-0.007440  
6925,-1.7897296561,2.0910793032\C,0.7159730299,-0.6427716634,1.7446136  
823\C,1.95837436,-0.3062212464,2.3708631074\C,2.442664783,-1.127502522  
9,3.3795112098\H,3.4029542628,-0.894558408,3.8522133811\C,1.6907185715  
,-2.2413819565,3.8527918423\C,0.4353450851,-2.5681181576,3.2211138668\  
C,-0.3295633338,-3.647538202,3.7576360865\H,-1.3010501259,-3.884602809  
2,3.3144057534\C,0.1344843904,-4.3861100821,4.8357656296\H,-0.47479757  
16,-5.204258299,5.2351509955\C,1.3886957699,-4.0865142102,5.432130354\  
H,1.7460002332,-4.6822981242,6.2789634075\C,2.146848648,-3.0308164673,  
4.951551119\H,3.106326665,-2.776351402,5.4159751394\C,4.4076174603,-2.  
8344333036,-2.7615332457\C,4.3883254435,-1.5889705742,-2.0840632333\H,  
5.3172437265,-1.2168296126,-1.6435431372\C,3.2095153765,-0.8662401596,  
-1.980257687\H,3.2199925769,0.0797565486,-1.4347443106\C,1.9957298214,  
-1.364671664,-2.5319391586\C,2.0250821789,-2.6261366759,-3.1755703947\  
H,1.1086865307,-3.0427512352,-3.6036478315\C,3.2106617352,-3.349797148  
6,-3.3099188044\H,3.1971197086,-4.3085273108,-3.8332663612\C,0.7237519  
831,-0.6725470659,-2.3408264905\C,-0.54228215,-1.4663386338,-2.2209619  
076\H,-1.3454212824,-0.8501945689,-1.7903777365\H,-0.3855073246,-2.367  
6259758,-1.611538963\H,-0.8557565011,-1.7917087778,-3.2314584904\N,0.5  
94504489,0.6378850454,-2.2212577592\H,-0.3091671583,0.953941459,-1.747  
7486454\C,1.5188232307,1.6825115198,-2.5118557433\C,1.5195053635,2.816  
269702,-1.6789212525\H,0.8439969713,2.8696616291,-0.8213610794\C,2.403  
095081,3.8699032011,-1.9514939413\H,2.408303024,4.7472120424,-1.298616  
3174\C,3.277443388,3.7985360777,-3.0454226468\C,3.2467007665,2.6764753  
289,-3.8916792843\H,3.9085885808,2.6252972631,-4.7625066748\C,2.364208  
1221,1.6218332691,-3.6378458545\H,2.3281947111,0.7560099819,-4.3044205  
238\C,2.7214853346,0.881958944,1.8901296106\C,2.1945844313,2.179099009  
1,2.0288496329\C,3.9705235793,0.7143463678,1.263151662\C,2.919868877,3  
.2861595547,1.5618513552\C,4.6658192304,1.82661384,0.7655416949\C,4.15  
26603933,3.1227972584,0.9183667531\C,-4.3990739285,-0.5556458704,-0.04  
52818814\C,-4.9255551307,-0.4305367941,-1.3461319334\C,-4.8941196047,0  
.2965326525,0.9651944542\C,-5.9243033625,0.5134868257,-1.6266351813\C,  
-5.8910307949,1.2359385218,0.6734102623\C,-6.4163593981,1.3563825342,-  
0.6223084266\H,3.9719274971,4.6204158391,-3.2481859851\H,-7.1907859861  
,2.0952175426,-0.8440429876\H,-4.5374543465,-1.0597664962,-2.152125349  
3\H,-4.5063008493,0.2202478613,1.9821995416\H,4.698997222,3.9862817053  
,0.5322786541\H,4.3833137724,-0.2902210665,1.1363106881\H,1.206657306,

2.32040674,2.4778359263\C,-6.5005388725,0.590551595,-3.0189867923\C,-6  
.3844153147,2.1735477932,1.7485321223\C,2.3232360871,4.6604558417,1.73  
96618294\C,5.9219366399,1.6255431288,-0.0415443517\F,-7.7223835104,2.3  
919275792,1.654472966\F,-5.7897428251,3.3945056691,1.664520746\F,-6.14  
25192965,1.7062981462,-2.9973199616\F,-6.9844005248,1.8234953222,-3.309  
0188584\F,-7.5337292122,-0.2813740942,-3.187154346\F,-5.5822818685,0.2  
843868436,-3.9704818751\F,2.0230153609,4.9161499586,3.0393429193\F,1.1  
606944144,4.8054277905,1.0450119196\F,3.1532509057,5.6484852846,1.3201  
928447\F,6.8130725611,2.6338265517,0.1198639698\F,5.6442452874,1.56831  
42029,-1.3791558641\F,6.5605528271,0.4686234239,0.2662431027\O,5.60437  
56784,-3.4504672186,-2.8201660277\C,5.71093687,-4.7287563662,-3.469094  
7183\H,5.4405597508,-4.653963642,-4.5378171302\H,6.7668717331,-5.02076  
82146,-3.3749746774\H,5.0721626599,-5.4799766447,-2.9707760735\\Versio  
n=ES64L-G09RevD.01\State=1-A\HF=-3931.2183293\RMSD=4.835e-09\RMSF=4.62  
7e-06\Dipole=4.4333069,-6.1057571,-4.0233678\Quadrupole=-15.9786828,11  
.240441,4.7382419,-1.7844896,-9.8361763,5.288135\PG=C01 [X(C51H32F12N1  
O5P1)]\@

### TRIFP/5 Type II Z

1\1\GINC-WORKER\FOpt\RTPSSTPSS\def2SVP/W06\C51H32F12N1O5P1\JHIOE\14-No  
v-2015\0\#p tpsstps/def2svp/w06 densityfit empiricdispersion=gd3 o  
pt scrf=(smd,solvent=ch2cl2,read)\title\0,1\P,-0.971243938,0.0527657  
698,-1.3689243488\O,-2.1142341676,1.1924760453,-0.8994164204\O,0.26235  
88679,0.469794819,-0.2698969259\O,-0.5973117305,0.3793926833,-2.784809  
5806\O,-1.3914812128,-1.3382382534,-0.9023814138\C,-1.572992475,1.9230  
852664,1.3067581242\C,-2.4314039688,1.237851924,0.4444090246\C,-3.6090  
232686,0.5560318964,0.889111788\C,-3.9151590146,0.6036896985,2.2433283  
841\H,-4.8175891312,0.1057098248,2.613760429\C,-3.0734696366,1.2704595  
602,3.1769996309\C,-1.8658103477,1.9158792273,2.7208219329\C,-0.985619  
2074,2.4622250271,3.7028831209\H,-0.0410050793,2.9106487743,3.38464376  
23\C,-1.302557868,2.418495828,5.0529577962\H,-0.6060295229,2.839067161  
1,5.7863835029,-2.5154045032,1.8256877461,5.494503622\H,-2.755546042  
7,1.8030531898,6.5628395026\C,-3.378904185,1.2580512942,4.5718058295\H  
,-4.3048261351,0.772089178,4.8989561192\C,-0.342518308,2.5599829879,0.  
7513085902\C,0.5565927658,1.787475717,0.0020928367\C,1.8357911214,2.29  
20488094,-0.4062412744\C,2.1569852206,3.6088218902,-0.0937353355\H,3.1  
311990638,4.0105984159,-0.3929334244\C,1.2332560566,4.4724971807,0.557  
0776916\C,-0.044907372,3.9523316285,0.974421035\C,-0.9770764443,4.8545  
883973,1.5706542244\H,-1.9652804121,4.4869400489,1.8614038665\C,-0.654  
3125694,6.1888981535,1.7685791481\H,-1.3906860958,6.8630257018,2.21957  
56032\C,0.6177602634,6.6918007881,1.3834853791\H,0.8599357821,7.747191  
2517,1.5484226966\C,1.5392924529,5.8483796165,0.784764109\H,2.51715806  
41,6.2258993302,0.4653925531\C,5.6748512036,-2.5233765014,1.2321208049  
\C,4.6729006373,-1.6994473526,1.803346711\H,4.9665139711,-0.9707585199  
,2.5638883721\C,3.3583370336,-1.7981970142,1.3765464595\H,2.6114045277  
,-1.1241532866,1.8037258663\C,2.9906357398,-2.7123915378,0.3489559013\  
C,4.0080005302,-3.5082746615,-0.232238008\H,3.7602852187,-4.2131795333  
,-1.0316380608\C,5.3301934616,-3.4359350146,0.2081641825\H,6.085554536  
7,-4.0773935385,-0.2520699212\C,1.6335483903,-2.7334842389,-0.18902214  
81\C,1.4018078529,-3.0368167461,-1.640237232\H,0.4497799673,-2.6018389  
543,-1.9828155595\H,1.3296529553,-4.1358606561,-1.7571731777\H,2.23346  
18175,-2.6861892415,-2.2637482789\N,0.557115723,-2.460080265,0.5274310  
886\H,-0.3034335186,-2.1533298359,-0.0309800517\C,0.4020206496,-2.4079  
841868,1.9437501325\C,-0.4117498434,-1.3973472873,2.4857078266\H,-0.87  
04397771,-0.6607890302,1.8214118579\C,-0.6030620855,-1.3381138016,3.87  
28169987\H,-1.2252427714,-0.5432769889,4.2949748783\C,-0.000602582,-2  
.2866341255,4.7127023028\C,0.7857652759,-3.312140718,4.1590850813\H,1.  
2397001469,-4.0692358399,4.8073341022\C,0.9876551045,-3.3819427183,2.7  
760265026\H,1.5882452607,-4.1858540659,2.3412882078\C,2.8369326688,1.4  
321725102,-1.1006618777\C,2.5187573529,0.7125586268,-2.2729995888\C,4.  
1511598258,1.3640186434,-0.5977374881\C,3.50927813,-0.0354021612,-2.92  
38528029\C,5.1282491054,0.5970734786,-1.2523177974\C,4.8185908387,-0.1  
060610699,-2.422366812\C,-4.4307471134,-0.2361520372,-0.0634927043\C,-  
4.8317254235,-1.5423077291,0.281410211\C,-4.8044070698,0.2726040523,-1  
.3233551669\C,-5.5847152318,-2.3165179959,-0.6124924972\C,-5.553998065  
2,-0.5124052243,-2.2113276254\C,-5.9487092026,-1.8128663257,-1.8691588  
531\H,-0.1508669607,-2.2346428712,5.7961177863\H,1.5002506647,0.738494  
5678,-2.6762797854\H,5.5790197073,-0.7066586172,-2.9289595613\H,4.4080  
025011,1.895793777,0.322849573\H,-4.5262712318,-1.9677294542,1.2416902

936\H,-4.5088630256,1.2834647972,-1.6127770108\H,-6.5229978654,-2.4236  
72471,-2.5694364345\C,3.2007182614,-0.7641242054,-4.2088971921\C,6.534  
8619857,0.5546872542,-0.7093509991\C,-6.0236711237,-3.6996167605,-0.19  
98393209\C,-5.8874528136,0.0504115731,-3.571223226\F,-6.3299800419,1.3  
328151463,-3.4942257476\F,-6.845232906,-0.6654306206,-4.2097599038\F,-  
4.8001349794,0.0680904943,-4.3889115582\F,-7.1619582948,-3.6695700848,  
0.5482279749\F,-6.2817667089,-4.4987170662,-1.2643208155\F,-5.08602738  
3,-4.326604161,0.5556512699\F,7.1564568727,-0.621077598,-0.9946996759\  
F,6.5739116072,0.7126259061,0.6366623711\F,7.3141842307,1.5386349299,-  
1.2360683983\F,3.6579554295,-2.0513222833,-4.1772943403\F,3.8057726349  
,-0.1794989905,-5.2787002921\F,1.8800297568,-0.8201073758,-4.481347626  
3\O,6.9189570564,-2.3483843621,1.7155309201\C,8.0106730701,-3.08919096  
14,1.1461716646\H,8.9096675325,-2.7411622712,1.6752249202\H,7.88081106  
24,-4.1742403916,1.3104232176\H,8.110499824,-2.8785853153,0.0672325214  
\Version=ES64L-G09RevD.01\State=1-A\HF=-3931.2210794\IRMSD=3.082e-09\RM  
MSF=5.973e-06\Dipole=4.6490629,-2.0097958,4.8449698\Quadrupole=4.62049  
65,12.8014166,-17.4219132,-28.9496843,-12.3998289,7.0177504\PG=C01 [X(  
C51H32F12N1O5P1)]\@\

### TRIFP/4 Type I E

1\1\GINC-WORKER\FOpt\RTPSSTPSS\def2SVP/W06\C51H29F15N1O4P1\JHIOE\13-No  
v-2015\0\#p tpsstps\def2svp/w06 densityfit empiricdispersion=gd3 o  
pt scrf=(smd,solvent=ch2cl2,read)\title\0,1\p,-0.1732148951,0.248566  
1723,1.1737911091\O,1.0633867446,1.1867660159,1.8220286766\O,-0.463368  
1007,1.2093997107,-0.1985550391\O,-1.334916526,0.2879669983,2.12180692  
82\O,0.4176847218,-1.0390766401,0.612503093\C,1.6398304964,2.927844221  
9,0.2833286773\C,1.9859103463,1.7550595,0.9631368332\C,3.2439357932,1.  
0963267876,0.7765755943\C,4.1915369784,1.7135284568,-0.0321311237\H,5.  
1679915344,1.2411675574,-0.1778109281\C,3.9144299678,2.9292574917,-0.7  
161318142\C,2.605103033,3.5268331897,-0.6044146588\C,2.3138417879,4.66  
07955778,-1.4224093758\H,1.3132310352,5.100084533,-1.3948666778\C,3.27  
81086362,5.2086522515,-2.2556165906\H,3.0285452565,6.0788979535,-2.872  
4815925\C,4.581776613,4.6484251199,-2.3238331243\H,5.3332230194,5.0935  
206813,-2.9848423025\C,4.8877953796,3.525112425,-1.5741333053\H,5.8751  
485143,3.0565168231,-1.6469032729\C,0.2345031567,3.4223711138,0.385880  
0761\C,-0.7908066673,2.5242535471,0.0734454129\C,-2.1743454238,2.89018  
86523,0.0572112457\C,-2.5094052882,4.19281017,0.4055228165\H,-3.559244  
8749,4.5055299866,0.394316588\C,-1.5154258063,5.1392279691,0.788186281  
9\C,-0.1232157023,4.7553069161,0.7954350207\C,0.8392388996,5.704343238  
3,1.2536056746\H,1.8924370922,5.4126314493,1.3034089317\C,0.4553281794  
,6.9784970969,1.6447248519\H,1.2111738374,7.6888936806,1.9970513757\C,  
-0.9103129742,7.3680824019,1.5997977315\H,-1.1987653074,8.3792995693,1  
.9065025503\C,-1.8743023361,6.4632131583,1.1850122547\H,-2.932752222,6  
.7462987298,1.1651642739\C,3.2202614298,-0.662547189,-3.3248897492\C,3  
.162147057,-2.041063729,-3.5936730581\H,4.0022286929,-2.5426202652,-4.  
081520029\C,2.0241820383,-2.7689605175,-3.2369486371\H,1.9821422992,-3  
.8419842315,-3.4452310843\C,0.952804297,-2.1293912678,-2.5750787351\C,  
1.0228696783,-0.7453546323,-2.3081317309\H,0.1894672942,-0.2317170318,  
-1.8267657764\C,2.1511697501,-0.0130241577,-2.6866976577\H,2.195696198  
2,1.0604835589,-2.4832510001\C,-0.2514172343,-2.9112661932,-2.20529253  
99\C,-0.8361360212,-3.8489736714,-3.2136639521\H,-1.925208483,-3.94564  
5495,-3.0830755146\H,-0.3839890139,-4.8529591004,-3.108950067\H,-0.611  
37672,-3.4830235027,-4.2266786569\N,-0.7673820043,-2.7060139213,-1.017  
8056903\H,-0.2682206415,-1.9883320516,-0.3688449961\C,-1.9207335628,-3  
.2924267263,-0.4161361864\C,-2.6879766002,-2.4616834931,0.4255367384\H  
,-2.3929096023,-1.4250941616,0.6064525947\C,-3.840145185,-2.9706495307  
,1.0347128336\H,-4.4449154505,-2.3120127695,1.6651381963\C,-4.21819689  
11,-4.3070151952,0.8312595893\C,-3.4235940628,-5.1425648213,0.03066336  
42\H,-3.6934705059,-6.195018557,-0.1052839974\C,-2.2720994436,-4.64546  
05677,-0.5933858448\H,-1.6393544816,-5.3156936496,-1.1783092522\C,-3.1  
948383673,1.8667453688,-0.293159916\C,-4.3408541244,1.6884705979,0.502  
7908079\C,3.0095184186,1.0212703931,-1.4078144871\C,-5.2698411124,0.6  
811546709,0.1950826274\C,-3.9357171942,0.0133340714,-1.6998549757\C,-5  
.073832434,-0.1708163046,-0.8995760544\C,3.4569612534,-0.2768105506,1.  
3050337202\C,3.9463925252,-1.2670647882,0.4285116377\C,3.1215506765,-0  
.6485856838,2.6205038245\C,4.0797366948,-2.5940720817,0.852943349\C,3.  
2659298904,-1.9807406592,3.0374627025\C,3.7378079221,-2.9670140137,2.1  
618286261\H,-5.1205908959,-4.7016518584,1.3098108513\C,4.463808884,0.1  
122059596,-3.6817490165\F,5.3837536929,0.0839980455,-2.6702271898\F,5.

0870533167,-0.3895260411,-4.7757938571\F,4.2040882133,1.418567285,-3.9  
292991466\H,4.1936543531,-1.0036448529,-0.602087076\H,-2.1317857366,1.  
1484014829,-2.0440601293\H,2.7437563009,0.0996172729,3.320410857\H,3.8  
394267718,-4.0039776067,2.4915081585\H,-4.4926129258,2.3173826152,1.38  
46821378\H,-5.7859771177,-0.9708539806,-1.1168954755\C,2.8494331864,-2  
.3475179898,4.4404518827\C,4.5204963905,-3.6524668201,-0.1260971612\C,  
-6.4443143733,0.4541741402,1.1142753576\C,-3.7106598601,-0.890564543,-  
2.8868574989\F,5.23109073,-3.1385031348,-1.1617545359\F,3.4571879848,-  
4.3083082496,-0.6750247377\F,5.2926314826,-4.6024286152,0.4593414578\F  
,3.3324852525,-3.5534976835,4.8288836738\F,1.4952899899,-2.409424625,4  
.5636571723\F,3.2744533856,-1.4336211301,5.3513578127\F,-4.1046081585,  
-2.1674676975,-2.6365120285\F,-2.3989264501,-0.9460264389,-3.246478131  
8\F,-4.3963615628,-0.4854857342,-3.9878847507\F,-6.1215593011,-0.37234  
22241,2.1521665246\F,-7.4938274429,-0.1208889071,0.4772961759\F,-6.891  
7241519,1.606888675,1.6704614583\Version=ES64L-G09RevD.01\State=1-A\H  
F=-4153.5772477\RMSD=5.641e-09\RMSF=6.228e-06\Dipole=-0.672679,-1.8202  
106,-4.204646\Quadrupole=-13.1661618,37.6929986,-24.5268368,12.0385863  
,1.0661512,18.7090707\PG=C01 [X(C51H29F15N1O4P1)]\@

### TRIFP/4 Type II E

1\1\GINC-WORKER\FOpt\RTPSSTPSS\def2SVP/W06\C51H29F15N1O4P1\JHIOE\19-No  
v-2015\0\#p tpsstps/def2svp/w06 densityfit empiricdispersion=gd3 o  
pt scrf=(smd,solvent=ch2cl2,read)\title\0,1\p,0.0285651733,0.3028462  
286,1.140494864\O,1.325740151,1.2999900335,1.5434352998\O,-0.487710969  
7,1.1708476206,-0.2259984424\O,-0.9622476759,0.3622801556,2.2620812412  
\O,0.5727719597,-1.003084093,0.5681250179\C,1.6905371793,2.8817239514,  
-0.2141456909\C,2.1294194928,1.7786538174,0.5267259553\C,3.3644526578,  
1.1056424496,0.2557810459\C,4.1902755495,1.629374089,-0.7318306299\H,5  
.1475894428,1.144281727,-0.9501546722\C,3.8094508973,2.7614797464,-1.5  
035686256\C,2.5230578978,3.3775906259,-1.2810972462\C,2.1163510575,4.4  
212218343,-2.1668469834\H,1.1273212986,4.871186034,-2.0445613294\C,2.9  
499108322,4.8627973594,-3.1840745778\H,2.6121582986,5.6626439391,-3.85  
20199937\C,4.2338564857,4.2839180618,-3.3721151991\H,4.8840383605,4.64  
6608518,-4.1755006771\C,4.6496642138,3.2499604982,-2.5495655911\H,5.62  
59672641,2.7755658422,-2.6996156443\C,0.3214081172,3.4118623456,0.0576  
018585\C,-0.7463458053,2.510191807,0.0065013746\C,-2.1039610237,2.8954  
500366,0.2297517416\C,-2.3701408756,4.2219067124,0.5391357211\H,-3.402  
9673503,4.5434522216,0.7121179394\C,-1.3220560788,5.1823654522,0.64305  
51424\C,0.0461018831,4.7801471209,0.4126927829\C,1.0754760798,5.752347  
3755,0.5953290308\H,2.119889734,5.4536836006,0.4673216475\C,0.77049549  
53,7.0601834681,0.9421694155\H,1.5780378192,7.7879565791,1.0777103628\  
C,-0.5788137176,7.4634116832,1.1294610698\H,-0.8057420239,8.5010237364  
,1.3970662015\C,-1.6012911081,6.5388890748,0.9891561174\H,-2.644639003  
8,6.8328309375,1.149960281\C,-4.1899751947,-3.7749874615,0.9114946581\  
C,-4.2530044913,-4.3366956493,-0.3742096058\H,-5.1143533997,-4.9425691  
734,-0.6695230586\C,-3.219186157,-4.1090104483,-1.2838628828\H,-3.3027  
904116,-4.5409579751,-2.283181104\C,-2.0973479957,-3.3234655866,-0.923  
8142297\C,-2.0363637045,-2.7972149371,0.3895637984\H,-1.1745643621,-2.  
2134314653,0.7236562652\C,-3.0783351092,-3.0070155721,1.2940563652\H,-  
3.0239554026,-2.5634002152,2.291322393\C,-1.0454810743,-3.0515669254,-  
1.9295198213\C,-1.1807689932,-3.6069315535,-3.3140420366\H,-0.45120358  
36,-3.1632338898,-4.0044835012\H,-2.1963666015,-3.4067963173,-3.691285  
3966\H,-1.0396734106,-4.7021841933,-3.3004599632\N,-0.0226932844,-2.29  
15362351,-1.6135569945\H,0.0580000267,-1.8011054137,-0.6552961247\C,1.  
0999908067,-1.9416491417,-2.4319713289\C,1.4040684732,-0.5737223564,-2  
.559340974\H,0.7651946315,0.1719960846,-2.0773460495\C,2.5256531597,-0  
.1914900131,-3.3055871951\H,2.7592410006,0.8714371319,-3.4183570675\C,  
3.3516392409,-1.1645873122,-3.8919996319\C,3.0544836149,-2.5274956431,  
-3.7333249697\H,3.7106790252,-3.2895793079,-4.165817681\C,1.9264274302  
,-2.9252663664,-3.002875801\H,1.7045937412,-3.9846381062,-2.8481947362  
\C,-3.170735585,1.8596905402,0.1476231116\C,-4.0114686017,1.60661438,1  
.2469829457\C,-3.3266422455,1.0867411928,-1.018354808\C,-4.9879207658,  
0.6022940771,1.1749631793\C,-4.31900424,0.0976867787,-1.0870209775\C,-  
5.1532250878,-0.1603430867,0.0092983243\C,3.6772450844,-0.1876338482,0  
.9179552616\C,4.0965371407,-1.275006707,0.124403577\C,3.5107903298,-0.  
3881225749,2.3012903688\C,4.3256511284,-2.5315922311,0.6992090274\C,3.  
7475543951,-1.650266002,2.8668972132\C,4.1495337243,-2.7344168306,2.07  
64167665\H,4.2348384437,-0.8601417588,-4.4634265908\C,-5.3520024936,-3  
.9754205477,1.8539348955\H,4.3237672055,-3.7163687039,2.5231311097\H,3



.1915087522,0.4392538642,2.9385920195\H,4.2062032432,-1.1459508006,-0.9558440145\H,-2.6730890373,1.2630014228,-1.8769954631\H,-5.9093279603,-0.9468809259,-0.0381527978\H,-3.8827574041,2.1786845585,2.1696185552\C,-5.8119744143,0.2779418696,2.396335408\C,-4.4960054126,-0.6620897096,-2.3776989503\C,3.5153549926,-1.8287224649,4.3469295387\C,4.6882412324,-3.6995998936,-0.1830143198\F,2.1892936555,-1.809216221,4.652359618\F,4.0891015096,-0.833649842,5.0735412041\F,4.0093470807,-3.0004902861,4.8156906938\F,5.3205874368,-3.3114579182,-1.3193357388\F,3.5854153434,-4.400758312,-0.5746551442\F,5.5005765037,-4.5860638952,0.44543235\F,-7.0478084511,-0.1799863808,2.0772503292\F,-5.2237990096,-0.6885415281,3.1568766564\F,-5.9785117775,1.3544367771,3.2046780362\F,-5.121041179,0.0852500602,-3.32677251\F,-5.2289526355,-1.7915951348,-2.2262086607\F,-3.2993429659,-1.0305148668,-2.9176497155\F,-6.4103257721,-3.1852127264,1.5141306549\F,-5.8068378154,-5.2546929334,1.8249915427\F,-5.0401298409,-3.6886570884,3.1371742199\Version=ES64L-G09RevD.01\State=1-A\HF=-4153.5750627\RMSD=2.953e-09\RMSF=4.901e-06\Dipole=0.9004615,-0.9808793,-5.8810547\Quadrupole=-13.8933715,25.613809,-11.7204376,7.7864556,-5.5930941,17.7001752\PG=C01 [X(C51H29F15N1O4P1)]\@\

### TRIFP/4 Type I Z

1\1\GINC-LOGIN\FOpt\RTPSSTPSS\def2SVP\W06\C51H29F15N1O4P1\JHIOE\21-Nov-2015\0\#p tpsstps\def2svp/w06 densityfit empiricaldispersion=gd3 opt t scrf=(smd,solvent=ch2cl2,read)\title\0,1\P,-1.4366806612,1.1936619328,0.6786222678\O,-2.4591806576,0.1567327481,1.5215028974\O,0.0015948157,0.3074158462,0.8510067118\O,-1.4189834889,2.4858874552,1.4390817839\O,-1.6978860998,1.1072242876,-0.824884848\C,-1.4015252625,-1.9788340264,1.7138836364\C,-2.435326338,-1.1871380067,1.2050038748\C,-3.4693540235,-1.7056979147,0.3589392548\C,-3.4328719842,-3.0593341776,0.0419597098\H,-4.2217235143,-3.4911069626,-0.5830162158\C,-2.3830880499,-3.9073561255,0.491002602\C,-1.33113444,-3.3645237489,1.3157338696\C,-0.2283794515,-4.2125214042,1.6385081819\H,0.6080955259,-3.8095990761,2.2152811101\C,-0.1919834236,-5.5331227133,1.2151835538\H,0.6701565938,-6.11589480538,1.4703408201\C,-1.2558486051,-6.0790603933,0.4486175957\H,-1.2177688652,-7.1260407809,0.1292515411\C,-2.3268774742,-5.2770066272,0.0905831027\H,-3.1423253555,-5.6756337456,-0.5234480382\C,-0.3423401554,-1.3526260938,2.5569464499\C,0.351141334,-0.2405618607,2.0659050088\C,1.5005430358,0.2991035804,2.7247889176\C,1.9206294882,-0.2780801228,3.9142000321\H,2.8108948977,0.1090202889,4.4214033323\C,1.1871905031,-1.3391808847,4.5192500532\C,0.0269032212,-1.8753652852,3.849299545\C,-0.7218389278,-2.8962884269,4.5093473747\H,-1.6254968259,-3.2865002109,4.0318294188\C,-0.3280653826,-3.3853642953,5.7461184877\H,-0.9229443111,-4.1639562661,6.2360855612\C,0.8349463877,-2.8804744721,6.3872334226\H,1.1379967057,-3.2794068047,7.3613080195\C,1.5724153937,-1.8737564767,5.7854959138\H,2.4610260884,-1.4627658902,6.2776317094\C,4.6479041038,-2.6470582548,-2.2797422385\C,4.4645742859,-1.4435167177,-1.5772730521\H,5.3076756716,-0.9660101016,-1.072316406\C,3.1987709982,-0.8577652689,-1.5269267464\H,3.0589864622,0.0736166862,-0.9734202142\C,2.1006921259,-1.4764087653,-2.1678443361\C,2.2895098485,-2.7035267195,-2.8393579713\H,1.448055389,-3.1998215901,-3.3302491204\C,3.5617351281,-3.2789919425,-2.9075158619\H,3.7072439254,-4.2210689287,-3.4437688065\C,0.7472162602,-0.8920650184,-2.0379559825\C,-0.4064446744,-1.7945596199,-1.7458729769\H,-1.3095338492,-1.218537009,-1.5005928384\H,-0.1532490659,-2.4844662197,-0.9256248538\H,-0.6060864732,-2.4129657444,-2.6418446599\N,0.5091745442,0.3957009406,-2.113993175\H,-0.4444618376,0.708508959,-1.7155323979\C,1.3630576221,1.4554891143,-2.5436647586\C,1.2338966472,2.7016179456,-1.9028668487\H,0.5142084284,2.8353221528,-1.0912363345\C,2.0504512496,3.7671297228,-2.3052515874\H,1.9570383852,4.7329408889,-1.8013490516\C,2.9822523902,3.5964296697,-3.3394467246\C,3.0774266354,2.3587246817,-3.998150343\H,3.7821043582,2.2277619242,-4.825768265\C,2.2653110241,1.2875828962,-3.6128442726\H,2.3230345364,0.3332683799,-4.1422339842\C,2.2401084632,1.429196156,2.0908968109\C,1.6434634554,2.696595643,1.9671068516\C,3.5354363608,1.2286860413,1.5773964933\C,2.3441743505,3.7469420444,1.3540707748\C,4.2101749158,2.2778827846,0.9363644113\C,3.626752272,3.5491216542,0.8290616639\C,-4.5083671104,-0.8127345342,-0.2195965901\C,-4.8779027206,-0.958957879,-1.5714494565\C,-5.1433059835,0.1902920765,0.5439889767\C,-5.8543257249,-0.1286831892,-2.1415828412\C,-6.1115633575,1.0185329014,-0.037731049\C,-6.4776429674,0.8711062208,-1.3841718687\H,3.6222866472,4.4307798454,-3.6444375253\C,6.0293675528,-3.2439346467,-2.4041635997\H,-7.2312383346,1.5236483932,-1.

8321728525\H,-4.3839861129,-1.7121747574,-2.192096232\H,-4.8836305227,  
0.3219602507,1.5956977823\H,4.157664905,4.364169403,0.3315952464\H,4.0  
028326116,0.2430716673,1.6529248845\H,0.6202398305,2.8535281619,2.3209  
594079\C,-6.2627265373,-0.3526634566,-3.5770684772\C,-6.7329499057,2.1  
263943954,0.7774593416\C,1.6586637961,5.0845537743,1.2233798822\C,5.52  
81440113,2.0241815756,0.2518872114\F,-8.018176383,2.3690227926,0.41220  
33513\F,-6.0612174212,3.3004893126,0.626954183\F,-6.7388409799,1.84976  
94406,2.1047365666\F,-7.2000269241,-1.3351376414,-3.6867256485\F,-5.21  
55413503,-0.7349842419,-4.3523302186\F,-6.7978989771,0.7569576322,-4.1  
420316949\F,1.1845632084,5.530701088,2.4142785659\F,0.5843846054,5.022  
6239049,0.3859263523\F,2.4793211135,6.0461554848,0.7322042055\F,6.3977  
819389,3.0534007992,0.3983903861\F,5.357033527,1.8534424455,-1.0930485  
938\F,6.1468101374,0.9047651105,0.7060336672\F,6.8449011003,-2.8738638  
465,-1.3870477849\F,6.000094008,-4.6002878259,-2.4236286652\F,6.638286  
3791,-2.8525832546,-3.5568243784\\Version=ES64L-G09RevD.01\State=1-A\H  
F=-4153.5696266\RMSD=6.818e-09\RMSF=6.301e-06\Dipole=3.178089,-4.38555  
87,-2.218004\Quadrupole=-27.8627674,9.2414258,18.6213416,23.2639738,1.  
3126074,-7.8439437\PG=C01 [X(C51H29F15N1O4P1)]\@

### TRIFP/4 Type II Z

1\1\GINC-LOGINFOpt\RTPSSTPSS\def2SVP/W06\C51H29F15N1O4P1\JHIOE\14-Nov  
-2015\0\#p tpsstps\def2svp/w06 densityfit empiricaldispersion=gd3 op  
t scrf=(smd.solvent=ch2cl2,read)\title\0,1\p,-0.8870328395,0.0284412  
541,-1.4401503389\O,-0.038260256,1.1346085962,-0.9174992656\O,0.365260  
7737,0.4368981495,-0.3655594529\O,-0.55425489,0.3840887065,-2.85903045  
57\O,-1.2729147511,-1.3798237383,-0.9898523504\C,-1.487625833,1.770177  
1886,1.3167332469\C,-2.3533088489,1.128277337,0.4276007591\C,-3.546043  
7515,0.4548286299,0.8480180174\C,-3.8574173906,0.4724217684,2.20318134  
94\H,-4.7778906363,-0.0056373288,2.5544300996\C,-3.0016947875,1.080690  
1515,3.1622490885\C,-1.7737179905,1.7015969337,2.7302946467\C,-0.87041  
67188,2.1694022043,3.7312242675\H,0.0933810873,2.5874545242,3.42893497  
92\C,-1.1893555162,2.0861616672,5.0788312354\H,-0.4748002902,2.4456308  
246,5.8271710769\C,-2.4285295728,1.5325192729,5.49810409991\H,-2.671618  
0141,1.4828189712,6.5648339935\C,-3.3123103083,1.0326622794,4.55557681  
61\H,-4.2568066126,0.5708766314,4.8641757549\C,-0.2674416503,2.4495441  
921,0.793086697\C,0.6324966273,1.7429647261,-0.0166493306\C,1.89723932  
71,2.292001327,-0.4062051011\C,2.2228126793,3.5757299552,0.015458012\H  
,3.192004312,4.0040315946,-0.2624154895\C,1.302990304,4.3775427092,0.7  
462733227\C,0.0244267751,3.8247476798,1.1177473561\C,-0.9102573621,4.6  
782947679,1.7790535436\H,-1.9012548112,4.2913201456,2.0330280617\C,-0.  
584709756,5.9904314976,2.0895232666\H,-1.3225907641,6.6274050913,2.589  
5342026\C,0.6918096923,6.5190534546,1.7587069988\H,0.9371989208,7.5551  
115534,2.0157645175\C,1.6133379433,5.727105495,1.0936622965\H,2.593288  
3326,6.1275091249,0.8106377905\C,5.6344461411,-2.0758812438,1.63724604  
66\C,4.5616904023,-1.2854505141,2.0813445685\H,4.7216613298,-0.5176036  
281,2.8428610371\C,3.2920488305,-1.467529265,1.5298363927\H,2.46615272  
77,-0.8304290435,1.8576585174\C,3.0868872309,-2.434909115,0.518789351\  
C,4.1780693728,-3.2060077996,0.063410192\H,4.0374330107,-3.9508717722,  
-0.7247809077\C,5.4442495602,-3.0351535223,0.6291184063\H,6.2865223336  
, -3.6361484336,0.2750240964\C,1.769204545,-2.5147833119,-0.1509156022\  
C,1.7225066269,-2.5802185396,-1.6410278799\H,0.6913562584,-2.557856764  
5,-2.0200510963\H,2.2144357935,-3.5121225897,-1.9755716401\H,2.3016156  
737,-1.7470198512,-2.0665358055\N,0.6336354653,-2.4410421497,0.4990454  
832\H,-0.2215856944,-2.1594127403,-0.098233261\C,0.4069115819,-2.52413  
71134,1.9053445879\C,-0.5220934622,-1.6366807575,2.4755974527\H,-1.030  
0974482,-0.9046416878,1.8428347952\C,-0.7608300722,-1.6903534325,3.854  
8278197\H,-1.4665905585,-0.9858035999,4.3048797694\C,-0.0966776284,-2.  
6353038586,4.6522232076\C,0.8028221551,-3.541557431,4.0653844212\H,1.3  
042780972,-4.296302579,4.6801093263\C,1.0586870333,-3.4939353206,2.690  
3502797\H,1.7456133764,-4.2073721522,2.2266214867\C,2.8720962193,1.513  
8705359,-1.2226061749\C,2.5247208765,0.9928735559,-2.4840832193\C,4.19  
03903837,1.3400506934,-0.7536259727\C,3.4915026352,0.3359987418,-3.263  
1789838\C,5.1380938338,0.6596166434,-1.530623372\C,4.799738611,0.15363  
49754,-2.7943518837\C,-4.3971930131,-0.2857418988,-0.1201824253\C,-4.9  
074214239,-1.5536069706,0.2331419091\C,-4.7233277566,0.2394600132,-1.3  
862194958\C,-5.7214411673,-2.2683570139,-0.65369479\C,-5.5345757774,-0  
.4892171318,-2.2694247865\C,-6.0421597368,-1.7451983149,-1.9160747909\  
H,-0.2881894164,-2.673934525,5.72969478\C,7.0053721929,-1.9119259942,2  
.2490077603\H,1.499721085,1.0937486296,-2.8577588481\H,5.5419494062,-0

.3700660161,-3.4024995368\H,4.4713352199,1.7248344803,0.230386324\H,-4.6511052213,-1.9903509682,1.2020813677\H,-4.352046866,1.221944474,-1.6842919178\H,-6.6764394149,-2.3044018556,-2.6086573466\C,3.09375207,-0.2206927958,-4.6094740316\C,6.5486328005,0.4796068413,-1.026189362\C,-6.2332594336,-3.6391708218,-0.285661933\C,-5.8239109619,0.0897233414,-3.6328827498\F,-6.0989599641,1.4184409168,-3.5709065246\F,-6.8792575186,-0.5097685042,-4.2371267281\F,-4.7624512716,-0.0444136513,-4.4729537373\F,-6.0985612755,-3.9087161879,1.0354756798\F,-7.5493682231,-3.784092661,-0.5918171088\F,-5.5742766693,-4.6226552542,-0.9571364361\F,7.0147977129,-0.7745924579,-1.2644874279\F,6.6525819202,0.6985532234,0.3091508369\F,7.4188977456,1.3324535959,-1.6308716962\F,2.4827920046,-1.4363955799,-4.5029199832\F,4.1615853933,-0.4002108874,-5.4261741616\F,2.2221564494,0.5889043391,-5.2575467015\F,7.9906064105,-2.0045662949,1.3212680441\F,7.2549921057,-2.879084958,3.1750361858\F,7.154452199,-0.7216694891,2.8774697322\Version=ES64L-G09RevD.01\State=1-A\HF=-4153.5710903\RMSD=4.156e-09\RMSF=3.460e-06\Dipole=2.2331952,-1.3467325,4.9989331\Quadrupole=-24.6556428,24.8476862,-0.1920434,-12.2353224,-23.9544221,7.906713\PG=C01 [X(C51H29F15N1O4P1)]\@\

### TRIM/3 Type I E

1\1\GINC-WORKER\VOpt\RTSPSS\def2SVP\C53H48N1O4P1\JHIOE\24-Apr-2018  
\O\#p tpsstps/def2svp empiricdispersion=gd3 int=ultrafine opt scrf  
=(smd,solvent=ch2cl2,read)\title\0,1\P,-0.1297143417,-0.4860433703,-  
1.1839383304\O,-1.4175075558,0.5618941922,-1.4320413577\O,0.6889832102  
,0.3763631976,0.0168282895\O,0.6300817555,-0.5399021282,-2.4784978792\  
O,-0.5766080585,-1.7420153175,-0.4359277394\C,-1.446100498,2.147809437  
,0.3711360845\C,-2.0698317941,1.122837238,-0.3502138217\C,-3.395018365  
8,0.6663965667,-0.0681477603\C,-4.0703770977,1.2454430496,0.9985929916  
\H,-5.095082782,0.9299435094,1.2232029452\C,-3.4593497944,2.2287931273  
,1.8282185621\C,-2.1205478813,2.6764874421,1.5309470667\C,-1.502671696  
6,3.5956395341,2.4329780968\H,-0.4706962922,3.9085577634,2.251357641\C  
,-2.1840971756,4.0819139807,3.5389827427\H,-1.6850717191,4.7804794202,  
4.2194778391\C,-3.5190578898,3.6730083748,3.8040883989\H,-4.0466914589  
,4.0672317544,4.679316788\C,-4.1381357835,2.7585716694,2.9673759161\H,  
-5.1579812303,2.4147168377,3.1741719223\C,-0.0995474827,2.6345132883,-  
0.0476174044\C,0.9455071297,1.7164195775,-0.1873343455\C,2.2926672419,  
2.1001225065,-0.4723187204\C,2.558703778,3.4483819763,-0.6657499207\H,  
3.5849117489,3.7741013745,-0.8683863455\C,1.5225638135,4.4269654309,-0  
.627942795\C,0.1688315104,4.0227443182,-0.3306877178\C,-0.8544115593,5  
.0185025682,-0.3633523236\H,-1.891720726,4.7236493662,-0.1814759087\C,  
-0.5547814947,6.3456273979,-0.6331615051\H,-1.3588983494,7.0894174279,  
-0.6571408924\C,0.7839495245,6.7474855465,-0.8872017123\H,1.0082027204  
,7.7998634367,-1.092917887\C,1.798284324,5.8032516275,-0.889462277\H,2  
.8323097674,6.0967771622,-1.1038106254\C,-0.8573168791,-0.0871264197,4  
.830477067\C,0.3250076425,-0.6640802772,5.339846067\H,0.5983745847,-0.  
4987194234,6.3877175012\C,1.1592184004,-1.4389797141,4.531247063\H,2.0  
63978865,-1.8641784067,4.9725342634\C,0.8369510599,-1.6781246632,3.170  
7619493\C,-0.3607975558,-1.1104431398,2.6642891292\H,-0.6471200511,-1.  
2563078529,1.6193677373\C,-1.1818764103,-0.3336673895,3.4772889235\H,-  
2.0910080112,0.1022022382,3.050863107\C,1.7346779162,-2.4877720368,2.3  
367466851\C,3.0307061219,-2.9840704286,2.9092756852\H,3.7204914907,-3.  
3197061151,2.1236646323\H,2.8474153916,-3.8258644017,3.6006465217\H,3.  
510628279,-2.179611337,3.4868696705\N,1.4180260578,-2.7627175612,1.084  
0668107\H,0.5664142926,-2.31860371,0.6154507535\C,2.1389962502,-3.6123  
512175,0.1823560853\C,2.4359775179,-3.1249009192,-1.1037939824\H,2.142  
6574357,-2.1148435791,-1.4029337988\C,3.1228698719,-3.9483988815,-2.00  
52601442\H,3.3672902628,-3.5612773484,-2.9999435028\C,3.4986477652,-5.  
2502233614,-1.638539936\C,3.173288782,-5.7378013746,-0.3624422118\H,3.  
4445753358,-6.7593282506,-0.0759896243\C,2.488803112,-4.9255523785,0.5  
51014429\H,2.2105874485,-5.3112801927,1.535916618\C,3.3574813722,1.049  
6078528,-0.5221976421\C,3.8820766371,0.6171273141,-1.7648178795\C,3.81  
33037978,0.4648578409,0.6883645237\C,4.8433702185,-0.4131956559,-1.774  
0880534\C,4.7797271731,-0.5540322703,0.6330473451\C,5.3007424794,-1.01  
73989861,-0.5905585388\H,5.2323858632,-0.7629238558,-2.7384472369\H,5.  
1287889563,-1.0034495867,1.5706543669\C,-4.0422033474,-0.3715952492,-0  
.93176383\C,-4.2439433849,-1.6877463165,-0.4441989481\C,-4.4757656684,  
-0.0220040175,-2.23750141\C,-4.8877849299,-2.6286176159,-1.2703109744\  
C,-5.1126323678,-0.9944206736,-3.0292151972\C,-5.3318232431,-2.3046804  
372,-2.5644701541\H,-5.0403127902,-3.6466576615,-0.8904703152\H,-5.451

247875,-0.7173306478,-4.035527591\H,4.0355422138,-5.8879162062,-2.3487  
788629\C,-1.7348499764,0.7905369911,5.6834699971\H,-2.803088998,0.5594  
643122,5.5276926166\H,-1.4973498997,0.687292941,6.7549605809\H,-1.5936  
724284,1.85096220385,5.4006266169\C,-4.2514305334,1.372187681,-2.780680  
954\H,-3.1760422211,1.5471962801,-2.9686362199\C,-3.7234763064,-2.1051  
234165,0.9133792143\C,-5.9947651326,-3.3402812992,-3.4460684157\H,-6.4  
26078201,-4.1627788767,-2.849975659\C,6.2928701293,-2.1588417764,-0.62  
10228897\H,6.6597440321,-2.3492514885,-1.6436977409\C,3.3756545,1.1994  
687316,-3.065533961\H,3.522494415,2.2931117325,-3.1124531776\C,3.25277  
58092,0.9160828036,2.0191222363\H,2.1855866063,0.6444731169,2.10728233  
77\H,-4.0946718188,-1.4538681333,1.7232781316\H,-4.7929250137,1.520997  
9015,-3.7298269317\H,-4.5831369161,2.146494748,-2.0656428727\H,-6.7978  
06258,-2.8945925833,-4.0592879214\H,-5.2622090159,-3.7874543359,-4.145  
8007235\H,-4.0136105911,-3.1435800729,1.1457399925\H,-2.620832606,-2.0  
443464438,0.9154533097\H,7.1653097059,-1.9530108279,0.0262097755\H,5.8  
285797651,-3.0921608477,-0.2499486333\H,3.892931698,0.7461038806,-3.92  
80518464\H,2.293546509,0.999192698,-3.1625821111\H,3.7944905462,0.4502  
560301,2.8591103921\H,3.3149641322,2.013378366,2.1334561607\Version=E  
S64L-G09RevD.01\State=1-A\HF=-2744.5738521\RMSE=5.533e-09\RMSE=4.297e-  
06\Dipole=1.9357807,-1.8507178,5.1028764\Quadrupole=-5.3970991,8.00075  
3,-2.6036539,-20.8029182,2.3839022,-6.5868824\PG=C01 [X(C53H48N1O4P1)]  
\@

### TRIM/3Type II E

1\1\GINC-WORKER\Opt\RTPSS\def2SVP\C53H48N1O4P1\JHIOE\19-Feb-2019  
\O\#p tpsstps\def2svp empiricaldispersion=gd3 int=ultrafine opt scrf  
=(smd,solvent=ch2cl2,read)\title\0,1\P,0.2435317475,-0.5269533003,-1  
.3378371932\O,-1.3323487876,-0.1477418071,-1.7685757054\O,0.4699021972  
,0.6376544369,-0.117007209\O,1.0960184283,-0.2617512622,-2.5438422821\  
O,0.2959534707,-1.8258336027,-0.5385430013\C,-2.2746832892,1.226493583  
5,-0.047677137\C,-2.2773858888,0.0321480603,-0.7756252488\C,-3.2471058  
074,-0.9997039478,-0.580999831\C,-4.2152945273,-0.8056545488,0.395002  
1261\H,-4.9823699696,-1.5717223468,0.5524632722\C,-4.2209376288,0.3501  
188667,1.2262881953\C,-3.225216969,1.3750918933,1.0268646148\C,-3.1934  
6662,2.4692479859,1.9443982728\H,-2.4173230832,3.2323805375,1.83842853  
67\C,-4.1146485351,2.5660998959,2.9772334299\H,-4.0613104839,3.4096361  
667,3.6742146243\C,-5.121032943,1.5768782932,3.1444291675\H,-5.8471699  
375,1.6686300398,3.959406921\C,-5.1677743596,0.490454057,2.2856082821\  
H,-5.9232767536,-0.2925053324,2.4172527029\C,-1.261439767,2.2777622615  
,-0.3533282494\C,0.0983997351,1.9471696664,-0.3419123043\C,1.137467880  
5,2.9186467402,-0.4742520895\C,0.7708376939,4.2406915359,-0.688774965\  
H,1.5474775973,5.008387768,-0.7766670916\C,-0.5947547522,4.6274142175,  
-0.8167345806\C,-1.6319984655,3.6360492501,-0.661695962\C,-2.988067127  
4,4.0426678655,-0.8498283197\H,-3.7833449153,3.2953549778,-0.775682668  
\C,-3.3065011483,5.3611282579,-1.1392614848\H,-4.354007383,5.646787500  
3,-1.2860433405\C,-2.2857042932,6.3426535443,-1.2564074654\H,-2.551165  
2176,7.3816816952,-1.4801307245\C,-0.957496745,5.9783557503,-1.1027315  
506\H,-0.1597292807,6.7224823159,-1.2082502562\C,5.4833263034,-2.14012  
29787,-1.1443327532\C,5.7306421425,-2.8473179851,0.0522098605\H,6.6365  
427024,-3.4572612938,0.140047481\C,4.838970088,-2.7893630703,1.1275472  
916\H,5.0525639248,-3.3668641124,2.0319307739\C,3.6499755476,-2.027028  
9312,1.0291316133\C,3.4173557768,-1.2912790454,-0.1566097527\H,2.56956  
08405,-0.6079006844,-0.2168799366\C,4.311356835,-1.35684245,-1.2226122  
605\H,4.096493846,-0.775685716,-2.1241443928\C,2.6888004543,-2.0092236  
362,2.1414654481\C,3.1842586652,-2.1621662917,3.5478839498\H,2.4700187  
721,-1.7501644495,4.2766823964\H,4.1573633458,-1.6581790304,3.65337519  
65\H,3.333581244,-3.2323566559,3.7814766065\N,1.4108029046,-1.85027446  
87,1.8706826158\H,1.0758599268,-1.7875177642,0.8447980496\C,0.31534386  
57,-1.8382452193,2.7946267404\C,-0.6331019434,-0.8060578198,2.67253913  
84\H,-0.4958150426,-0.0350402665,1.9100882794\C,-1.7429072914,-0.79154  
79705,3.5266631533\H,-2.4739474544,0.0180946614,3.443952387\C,-1.92373  
29882,-1.8128813717,4.472948404\C,-0.9900559545,-2.8571649464,4.564082  
8742\H,-1.1370215966,-3.6679141932,5.2853058165\C,0.1329950313,-2.8770  
53562,3.7255947437\H,0.8457036435,-3.7048113935,3.7730874932\C,2.57217  
12299,2.5107711645,-0.3407121448\C,3.401556444,2.4279319575,-1.4861961  
731\C,3.1002132823,2.2187172891,0.9446881804\C,4.7534919051,2.06716884  
75,-1.3224768813\C,4.4548225242,1.8624976753,1.0613766709\C,5.30138742  
58,1.7820671853,-0.0602565273\H,5.390347601,1.9914610335,-2.2125268322  
\H,4.8578875781,1.6338434849,2.0560987318\C,-3.2160576671,-2.243669579

2,-1.4118260971\C,-2.8299770476,-3.4773063639,-0.8233985007\C,-3.58450  
36268,-2.1906600723,-2.7793020362\C,-2.8242400561,-4.6365252919,-1.618  
9340461\C,-3.5655293993,-3.3770693425,-3.538025964\C,-3.1905104272,-4.  
61074573,-2.9786059461\H,-2.5154407823,-5.5866750662,-1.1647402013\H,-  
3.8534471233,-3.3321384655,-4.5958293755\H,-2.7990717664,-1.8001211591  
,5.1309162534\C,6.4543043622,-2.1752093848,-2.2972938392\H,6.901453801  
1,-1.1750217474,-2.4521108064\H,7.2711211387,-2.894557594,-2.123260083  
3\H,5.9401721209,-2.4446147531,-3.23762474\C,-3.9858706027,-0.88263478  
51,-3.4247287779\H,-3.1162056716,-0.2047077481,-3.5027870211\C,-2.3845  
588995,-3.5414921068,0.6214908212\C,-3.1797698382,-5.879398954,-3.8032  
646024\H,-2.1963757235,-6.381849568,-3.7499755494\C,6.7409265654,1.345  
3871767,0.0926836608\H,7.3105145598,1.4908840155,-0.8407242904\C,2.832  
8134937,2.65292794,-2.8697324635\H,2.3706978268,3.65082819,-2.97022757  
25\C,2.2176821247,2.268198748,2.1723583253\H,1.4473667371,1.4768073419  
,2.131711857\H,-3.2056148452,-3.2997725502,1.3196980058\H,7.2489790231  
,1.9031614041,0.9002481813\H,6.7950936194,0.2723080333,0.3578110273\H,  
2.8074195659,2.1214195987,3.0927319637\H,1.6829617781,3.2318586091,2.2  
518107812\H,3.6170677866,2.5576748417,-3.6397544227\H,2.0485128537,1.9  
003627647,-3.072525495\H,-3.404337333,-5.674878539,-4.8637034339\H,-3  
.9290812658,-6.6032508668,-3.4304449221\H,-4.3855651684,-1.0454863959,  
-4.4397324074\H,-4.7538916732,-0.3559334004,-2.8298514312\H,-2.0092729  
934,-4.5475773895,0.8738884663\H,-1.5760020982,-2.812302817,0.79703416  
08\Version=ES64L-G09RevD.01\State=1-A\HF=-2744.5726292\RMSD=2.951e-09  
\RMSF=2.887e-06\Dipole=2.4766682,-1.5582316,4.8253892\Quadrupole=14.52  
75706,-5.9773321,-8.5502385,-18.0566483,2.3442691,-15.847193\PG=C01 [X  
(C53H48N1O4P1)]\@

### TRIM/3 Type I Z

1\1\GINC-WORKER0\FOpt\RTPSSSTPSS\def2SVP\C53H48N1O4P1\JHIOE\26-Jul-2018  
\0\#p tpsstps\def2svp empiricdispersion=gd3 int=ultrafine opt scrf  
=(smd,solvent=ch2cl2,read)\title\0,1\p,-0.8276606014,-0.0187045862,-  
1.5169770907\O,-2.1610960164,0.8541350707,-0.9842865353\O,0.3519308611  
,0.614127009,-0.4737541777\O,-0.6032920756,0.3557444103,-2.95036586\O  
,0.930217258,-1.4682031005,-1.0406614122\C,-1.6072258536,1.7747271701  
,1.1514785431\C,-2.3907532762,0.9133267788,0.3787113357\C,-3.446006128  
1,0.1169148172,0.9233812724\C,-3.6557033344,0.1729748074,2.2957380914\  
H,-4.4681690603,-0.411936594,2.7408164762\C,-2.8321669623,0.9592641972  
,3.1514969581\C,-1.7830315181,1.7691004903,2.5816113589\C,-0.927589927  
9,2.4889331862,3.4704746785\H,-0.1017634222,3.0757951547,3.0584327498\  
C,-1.1185188863,2.4400050377,4.8436361397\H,-0.443989304,2.9948479147,  
5.5050120556\C,-2.1766996833,1.6720562873,5.4001633756\H,-2.3209993622  
,1.6477215126,6.4857981823\C,-3.0122625307,0.9445155422,4.5679123213\H  
,-3.8211084355,0.3335342287,4.9846317358\C,-0.5623129576,2.6080756227,  
0.4907001058\C,0.4257540357,1.977207779,-0.2719593086\C,1.5678291966,2  
.6683252869,-0.7825743365\C,1.6384263532,4.042066101,-0.5954234547\H,2  
.5105530334,4.5929654265,-0.9642132462\C,0.6017667416,4.7614690356,0.0  
678751553\C,-0.5188545481,4.0413709944,0.622774083\C,-1.5570940343,4.7  
888708537,1.2572260683\H,-2.4290788024,4.2586508921,1.6517161694\C,-1.  
4814219618,6.1697616662,1.3632108865\H,-2.2940549781,6.7228811052,1.84  
70024004\C,-0.3629718229,6.8744721332,0.8418805781\H,-0.3131792559,7.9  
647753059,0.9361598954\C,0.6539064614,6.1815368838,0.204099413\H,1.514  
6336341,6.7155058426,-0.2146028399\C,4.925782249,-2.5530092491,3.83338  
38676\C,4.9710513744,-2.2533041726,2.4520963771\H,5.9413666348,-2.1320  
595609,1.9573478451\C,3.8035874243,-2.1035162904,1.7059059584\H,3.8743  
369168,-1.8492763819,0.6454273506\C,2.5345209757,-2.2279257364,2.32482  
72581\C,2.4828489132,-2.4880906057,3.712820841\H,1.5174053448,-2.57753  
31665,4.2192330536\C,3.6611568124,-2.6642600415,4.4460231295\H,3.59854  
4988,-2.8876845557,5.5167095567\C,1.289601794,-2.0044578777,1.57058475  
88\C,0.1332430703,-1.32384822,2.2394109419\H,-0.6352773219,-1.04041838  
89,1.5073643195\H,0.4795702392,-0.4345740287,2.7893881683\H,-0.3168826  
081,-2.0139269294,2.9773122727\N,1.1363501123,-2.3399067772,0.31093222  
66\H,0.2483906631,-1.9742996317,-0.1974988486\C,1.9901194404,-3.116055  
3046,-0.5334965307\C,2.2450984235,-2.6336089361,-1.8295660933\H,1.8247  
362073,-1.677909186,-2.1527425539\C,3.0580938678,-3.3824223145,-2.6913  
95739\H,3.2689965324,-3.0006447174,-3.6956611479\C,3.5987136306,-4.607  
1362586,-2.2694761201\C,3.3126261359,-5.0935153182,-0.9822806224\H,3.7  
148843706,-6.0586067401,-0.6567224715\C,2.5049581184,-4.354913102,-0.1  
095201495\H,2.2692804865,-4.731912988,0.889599199\C,2.6887335779,1.891  
1750114,-1.400731072\C,2.8410456697,1.8113453196,-2.8051637534\C,3.606

7263762,1.2326841637,-0.5407317457\C,3.9104845766,1.0568455387,-3.3290  
221326\C,4.6626398419,0.4962142807,-1.1049017307\C,4.8302401702,0.3912  
446582,-2.4997123966\H,4.0238548653,0.9876379485,-4.418106933\H,5.3748  
14275,-0.0061570828,-0.4384558324\C,-4.3165334672,-0.7129898771,0.0328  
675197\C,-4.2556363193,-2.1298525711,0.0787151121\C,-5.2319563775,-0.0  
687524196,-0.8409292485\C,-5.1146783393,-2.8749822757,-0.7513155168\C,  
-6.0720392062,-0.8535593764,-1.6512019794\C,-6.0279989213,-2.259783946  
4,-1.626114372\H,-5.059945426,-3.9703397563,-0.7173212699\H,-6.7821285  
416,-0.3499728454,-2.31928434\H,4.2331579894,-5.1891802442,-2.94615272  
76\C,6.2003309209,-2.7372011947,4.6181174878\H,6.848030984,-1.84581034  
04,4.529325248\H,5.9979433297,-2.9171435766,5.6864275966\H,6.779615056  
6,-3.5932592347,4.22470431\C,-5.3146627956,1.4409614811,-0.9045234415\  
H,-4.4101794958,1.8616381246,-1.3809350109\C,-3.2519350809,-2.84336273  
07,0.9585239473\C,-6.9117859402,-3.0803130703,-2.5396811853\H,-7.89941  
05815,-2.6066274991,-2.6796721883\C,5.9561992796,-0.4373798828,-3.0777  
820071\H,6.0400942086,-0.301451055,-4.1692177468\C,1.8492517187,2.4851  
701213,-3.726381206\H,1.7646331245,3.565779423,-3.5127312055\C,3.44238  
71693,1.3147486851,0.9610899415\H,3.3442609196,2.3620445065,1.29896701  
88\H,-3.3673461566,-2.5807811747,2.0244867413\H,4.2988879547,0.8588430  
51,1.4832654598\H,2.5265688612,0.7874531023,1.2854071457\H,6.926858270  
3,-0.173592423,-2.6197155355\H,5.7909811465,-1.5144289833,-2.883411443  
9\H,2.1426782602,2.3638016334,-4.7829859333\H,0.8476232198,2.038066426  
7,-3.5869485771\H,-3.352991868,-3.9375679003,0.8621858497\H,-2.2300409  
974,-2.5584001925,0.6536652629\H,-7.0657953811,-4.1001457807,-2.146931  
0397\H,-6.4531107132,-3.178123456,-3.5429738163\H,-6.1915414699,1.7664  
391658,-1.4887730518\H,-5.3846985025,1.8867468348,0.1040466993\Versio  
n=ES64L-G09RevD.01\State=1-A\HF=-2744.5683203\RMSD=2.792e-09\RMSF=1.53  
7e-06\Dipole=4.0253688,-2.7545032,4.7228696\Quadrupole=5.6749485,3.162  
6588,-8.8376074,-17.3017142,0.7996482,-5.2729635\PG=C01 [X(C53H48N1O4P  
1)]\@

### TRIM/3Type II Z

1\1\GINC-LOGIN\Opt\RTPSSTPSS\def2SVP\C53H48N1O4P1\JHIOE\26-Jul-2018\O  
\#p tpsstps/def2svp empiricaldispersion=gd3 int=ultrafine opt scrf=(  
smd,solvent=ch2cl2,read)\title\O,1P,-0.8097299545,0.0198445938,-1.5  
945530372\O,-2.1085145285,0.9344808595,-1.052246945\O,0.3671978948,0.5  
176097658,-0.475648838\O,-0.5186893,0.4696256823,-2.9945337106\O,-1.00  
36896992,-1.4509188757,-1.2224842133\C,-1.5749649858,1.7362848631,1.13  
56435565\C,-2.3830695381,0.9577767616,0.3025340357\C,-3.5105827685,0.2  
17085438,0.7753483372\C,-3.7809370864,0.2493543802,2.1373054442\H,-4.6  
468313523,-0.2958476192,2.5282559848\C,-2.9442341304,0.9496777062,3.05  
2845913\C,-1.8113368643,1.6930931304,2.5571085168\C,-0.9398044202,2.30  
79429318,3.5066323905\H,-0.0519217694,2.8384100405,3.1509170338\C,-1.1  
911936326,2.2240387445,4.8682567912\H,-0.5020425529,2.6960445026,5.577  
178377\C,-2.3297758177,1.5251267792,5.3521189045\H,-2.5204817245,1.472  
1972461,6.4295310129\C,-3.1849246903,0.8986085014,4.459355235\H,-4.054  
182749,0.3373693206,4.8204023524\C,-0.4538064189,2.5245452204,0.546572  
7645\C,0.5211981333,1.8636608683,-0.2080448611\C,1.7263613449,2.499070  
215,-0.6410704833\C,1.8703652434,3.8587841917,-0.4023862125\H,2.790265  
6826,4.3660265056,-0.7135255294\C,0.8510074624,4.6175092539,0.24362674  
5\C,-0.3289092719,3.9474308315,0.7347048608\C,-1.3419808179,4.73428700  
6,1.362242067\H,-2.2556718096,4.2452425253,1.7127178886\C,-1.189994598  
7,6.1043701714,1.5167978622\H,-1.9846999815,6.6886019313,1.99370251\C,  
-0.016405054,6.7584566999,1.0544021871\H,0.0927490311,7.8405088005,1.1  
861714389\C,0.9804257184,6.026945076,0.4282641982\H,1.8850707313,6.521  
5805412,0.0566556713\C,5.9911932286,-3.230915003,1.3741516144\C,4.9655  
437662,-2.5503912325,2.0689385623\H,5.1711954174,-2.1343277256,3.06141  
74124\C,3.6990128986,-2.382970161,1.5112635522\H,2.9449573362,-1.82370  
29986,2.0681745493\C,3.4091588071,-2.8799930188,0.2155719435\C,4.43776  
71284,-3.5499938596,-0.4876332329\H,4.2516423537,-3.9486727146,-1.4885  
184423\C,5.6976438559,-3.7323951039,0.0899780174\H,6.4721195423,-4.265  
9195208,-0.4717635652\C,2.1246455677,-2.6038838736,-0.4501041127\C,2.1  
031493245,-2.3807928333,-1.9327053734\H,1.0793783668,-2.2237135989,-2.  
2998541595\H,2.54834036,-3.2437090406,-2.4561352622\H,2.724506846,-1.4  
986418542,-2.1720186175\N,0.9808195457,-2.4564099052,0.1785085768\H,0.  
1575898164,-2.0741492039,-0.4141870135\C,0.6452981065,-2.6673992696,1.  
5516323296\C,-0.08046437,-1.6543428462,2.2036730258\H,-0.3286411148,-0  
.7356338368,1.6645713625\C,-0.4608594418,-1.8358216081,3.5401603669\H,  
-1.0158501699,-1.0434142073,4.0525993595\C,-0.1358111935,-3.0252359779

,4.2111391094\C,0.5663461447,-4.0415164428,3.5403963341\H,0.8053461937  
,-4.9777435911,4.0557941012\C,0.9586294381,-3.8714071961,2.2068613996\  
H,1.4981520364,-4.6601092689,1.6746424425\C,2.8346696818,1.6738028922,  
-1.2195898909\C,3.0475415421,1.5931387508,-2.6177938971\C,3.6841684457  
,0.9751525781,-0.3241862073\C,4.0989919581,0.7885358853,-3.0969298415\  
C,4.7264185072,0.1860627119,-0.8449761814\C,4.9471015329,0.0730104327,  
-2.2296335174\H,4.2575471984,0.7182507766,-4.1803980947\H,5.3772096599  
,-0.3577735763,-0.1498570115\C,-4.3713129955,-0.5521565352,-0.17706180  
07\C,-4.3417993118,-1.9694849787,-0.1770240662\C,-5.2251838776,0.14366  
87412,-1.0725581217\C,-5.1730686174,-2.666666411,-1.0747881523\C,-6.04  
14115885,-0.5930633484,-1.9487063076\C,-6.0322913922,-2.0008507132,-1.  
9663959601\H,-5.1403445819,-3.7633671077,-1.0802684207\H,-6.7028541697  
,-0.0514232507,-2.636736043\H,-0.4372695534,-3.1661820005,5.2544659064  
\C,7.3636077886,-3.3772266237,1.9810802089\H,7.3013117327,-3.709577191  
9,3.032523965\H,7.983186685,-4.0939813299,1.417773804\H,7.8862369604,-  
2.4015839271,1.9823715542\C,-5.2572929574,1.656100284,-1.091927173\H,-  
4.3051709951,2.061436602,-1.4807414606\C,-3.4059582913,-2.72822845,0.7  
382541372\C,-6.937715462,-2.7677761638,-2.9050142348\H,-6.9290774109,  
-2.3306381603,-3.9196008744\C,6.0338029153,-0.8276251994,-2.7741591002  
\H,6.5118872965,-0.3901356502,-3.6683459761\C,2.1405583371,2.330699242  
9,-3.5761803538\H,2.0917702593,3.408367351,-3.3375488361\C,3.471163046  
3,1.0751529413,1.1706237596\H,2.5056372865,0.6258852891,1.4672716134\H  
,-3.6680421275,-2.5942743021,1.8031722512\H,6.8144010182,-1.022238643,  
-2.0190985603\H,5.6141821607,-1.8068015947,-3.0761464337\H,2.490009562  
8,2.2225642537,-4.6170448172\H,1.1128261932,1.927955534,-3.5064259858\  
H,4.272939684,0.5586065093,1.7221159793\H,3.4438343653,2.1288772069,1.  
5020135874\H,-3.4284451821,-3.8087205765,0.5167437722\H,-2.3732514837,  
-2.3653601163,0.6037266124\H,-6.6375628502,-3.8267887841,-2.9808338373  
\H,-7.9867425606,-2.7410171958,-2.5518186145\H,-6.0743045744,2.0285387  
318,-1.732264665\H,-5.3940202064,2.071014808,-0.0768231227\Version=ES  
64L-G09RevD.01\State=1-A\HF=-2744.571283\RMSD=4.930e-09\RMSF=1.426e-06  
\Dipole=4.4526636,-3.1427545,3.5680717\Quadrupole=12.8721156,4.3863326  
,-17.2584483,-21.5761061,-6.4216927,2.5011674\PG=C01 [X(C53H48N1O4P1)]  
\@

### TRIM/5 Type I E

1\1\GINC-WORKER1\FOpt\RTPSS\def2SVP\C53H48N1O5P1\JHIOE\24-Aug-2018  
\O\#p tpsstps/def2svp empiricdispersion=gd3 int=ultrafine opt scrf  
=(smd,solvent=ch2cl2,read)\title\0,1\p,-0.7389017441,1.0657643175,-1  
.2865518693\O,0.7896067257,1.1338399846,-1.9811674064\O,-0.624379375,-  
0.4468164109,-0.5436835931\O,-1.7222265647,1.0807873168,-2.4224116083\  
O,-0.8435237737,2.0149765025,-0.094087162\C,2.0936922573,-0.699585288,  
-1.1328192266\C,1.9004940118,0.6779725777,-1.2981102451\C,2.8515585399  
,1.653426018,-0.8638360338\C,3.9962837631,1.2083016142,-0.2159837317\H  
,4.7509320953,1.9348723287,0.1045581204\C,4.2220120929,-0.1737323576,0  
.0437259641\C,3.2511977127,-1.1466562398,-0.3958984619\C,3.4766223404,  
-2.5170921875,-0.059179797\H,2.7279238559,-3.2647986869,-0.3343821617\  
C,4.6242395181,-2.9120130952,0.6127730534\H,4.7717759642,-3.9695731424  
,0.8572923355\C,5.6018252612,-1.9564024719,1.0005060664\H,6.5047671648  
,-2.2816288521,1.528390221\C,5.3927302306,-0.6128790943,0.7339522515\H  
,6.1239546962,0.1390186345,1.0517463534\C,1.0936152076,-1.6608041097,-  
1.6819672279\C,-0.2504643226,-1.5214470853,-1.3237889468\C,-1.26021626  
,-2.4684262495,-1.6796219842\C,-0.887536177,-3.5520151245,-2.462837277  
\H,-1.6346818612,-4.3048092723,-2.7368535428\C,0.4454752845,-3.6999304  
006,-2.9472511371\C,1.4522986673,-2.7352206352,-2.5738883901\C,2.75805  
70249,-2.8699877891,-3.1359820628\H,3.5190438895,-2.1204913564,-2.9000  
751159\C,3.0676939295,-3.9227624347,-3.9841977943\H,4.0748210444,-3.99  
9826521,-4.4085513646\C,2.0873164905,-4.8963872908,-4.3151571601\H,2.3  
465326466,-5.7271675043,-4.9805110319\C,0.8018549902,-4.7802005884,-3.  
810367965\H,0.0307298516,-5.5121099604,-4.0768082699\C,1.1954095436,-0  
.9137618717,4.0701372139\C,0.0246214764,-1.2003231266,4.8144312996\H,0  
.1133585328,-1.8093782857,5.7189168788\C,-1.2076083016,-0.7222384469,4  
.3918643288\H,-2.0879003473,-0.9683466653,4.990663233\C,-1.3291200889,  
0.0736648705,3.2159649538\C,-0.1400758996,0.3626619469,2.4958975884\H,  
-0.1768576077,0.9610526721,1.5818501899\C,1.0991667293,-0.1205991905,2  
.9019419635\H,1.9826067714,0.1148535823,2.3045058954\C,-2.6389793618,0  
.5479569834,-2.7784996898\C,-3.8698962367,0.1343746486,3.5352146939\H,-  
4.7818046844,0.2841836702,2.9413176583\H,-3.9600545285,0.7181779264,4.  
4687347111\H,-3.7982822767,-0.9274611891,3.8136016969\N,-2.7521625212,

1.3232191619,1.7090178313\H,-1.9097003663,1.5380892163,1.0939733629\C,  
-3.9474164388,1.9227407589,1.1981198001\C,-4.2242462095,1.7881674566,-  
0.175632233\H,-3.5478658221,1.2305787729,-0.8297860179\C,-5.3822436541  
.2.3757013342,-0.7015704001\H,-5.6029911282,2.2575628,-1.7676864938\C,  
-6.2521998678,3.1035105962,0.1257908664\C,-5.9522716022,3.2585749923,1  
.4886812897\H,-6.6134097755,3.8439694554,2.1363876943\C,-4.7984868923,  
2.6758866156,2.0293805529\H,-4.5479519892,2.8180202491,3.084319208\C,-  
2.6580022873,-2.2616225989,-1.1857099111\C,-3.6700172801,-1.8176263647  
,-2.0721547083\C,-2.9529414843,-2.4721991273,0.1870531488\C,-4.9599116  
215,-1.5716341331,-1.5614153111\C,-4.2554805929,-2.2219600251,0.651726  
2342\C,-5.2735567736,-1.7585872759,-0.2043727918\H,-5.7362655563,-1.20  
63223627,-2.2449956682\H,-4.478608705,-2.3864286369,1.7129280897\C,2.6  
433753772,3.1057340554,-1.1653898519\C,2.2404418196,4.0063620906,-0.14  
96053383\C,2.8777933388,3.5765670457,-2.4843208157\C,2.0913357539,5.37  
06030372,-0.4692771137\C,2.7180183995,4.945291414,-2.7591497732\C,2.32  
66004753,5.8624593815,-1.7644252229\H,1.7763573115,6.0653239788,0.3193  
74509\H,2.9056452613,5.3054381224,-3.7786651395\H,-7.1562815105,3.5589  
350696,-0.2921933408\C,3.2923379263,2.6196507385,-3.5803614061\H,2.483  
8786478,1.8968727858,-3.7956292643\C,1.9139055213,3.5116424884,1.24191  
74573\C,2.1685569608,7.3310845744,-2.0919429525\H,1.8661418643,7.91370  
48407,-1.2054229117\C,-6.6512068239,-1.4443027221,0.3360359624\H,-7.34  
52951725,-1.1525791709,-0.4700558648\C,-3.3641694008,-1.5496082348,-3.  
5290266737\H,-3.0017070162,-2.455166969,-4.047391244\C,-1.8795292508,-  
2.9470880058,1.142033284\H,-1.0926442168,-2.1813935469,1.2630409973\H,  
2.7312831516,2.9068599004,1.6716047463\H,3.5259556189,3.1598356749,-4.  
5129579423\H,4.1807627159,2.0304543783,-3.2883725849\H,3.1142738493,7.  
7571981315,-2.4758709392\H,1.4063978,7.4843406041,-2.8786645043\H,1.70  
89528288,4.3527315529,1.9254581534\H,1.0142551049,2.8723008927,1.19732  
0883\H,-7.0840465842,-2.3123340737,0.8668077208\H,-6.6091884476,-0.610  
9419144,1.0625820815\H,-4.2614862886,-1.1869507477,-4.0587217154\H,-2.  
5772525368,-0.7783313332,-3.6055267446\H,-2.2998213105,-3.1617480938,2  
.1386528109\H,-1.3845022168,-3.8624686579,0.7701361645\O,2.3430436161,  
-1.4350808691,4.5442682813\C,3.5561185559,-1.2248489655,3.7955645002\H  
,4.338858218,-1.7702208916,4.3419109991\H,3.4568640836,-1.6373852129,2  
.7781060188\H,3.813716915,-0.151975784,3.7478151179\Version=ES64L-G09  
RevD.01\State=1-A\HF=-2819.7397281\RMSD=6.289e-09\RMSF=3.173e-06\Dipol  
e=-0.6869315,-1.1085044,5.0103655\Quadrupole=19.5586836,-17.6270667,-1  
.9316169,-11.0830477,-13.8552963,4.7503571\PG=C01 [X(C53H48N1O5P1)]\@

### TRIM/5 Type II E

1\1\GINC-LOGIN\FOpt\RTPSSTPSS\def2SVP\C53H48N1O5P1\JHIOE\23-Aug-2018\O  
\#p tpsstps/def2svp empiricaldispersion=gd3 int=ultrafine opt scrf=(  
smd,solvent=ch2cl2,read)\title\O,1P,0.1721866513,-0.5092369302,-1.2  
765519995\O,-1.3746145773,-0.0879275735,-1.7712134355\O,0.3731625788,0  
.6359729087,-0.0334018517\O,1.0869002026,-0.2501124859,-2.438276846\O,  
0.1606286532,-1.8190194287,-0.4954847129\C,-2.3594176932,1.2683961522,  
-0.0591452859\C,-2.3573276992,0.0915589601,-0.8151710115\C,-3.35767376  
56,-0.9211681064,-0.6859053583\C,-4.3576388574,-0.7305909674,0.2584861  
641\H,-5.1466464327,-1.4828386631,0.3663316103\C,-4.3703653297,0.40337  
93946,1.1190908183\C,-3.3480375071,1.4117466456,0.980849663\C,-3.32996  
04856,2.4849009891,1.9230918801\H,-2.5359221598,3.2345526793,1.8631328  
276\C,-4.2880044706,2.5783834356,2.9220693913\H,-4.2450012517,3.405782  
5054,3.6388932834\C,-5.3185118613,1.6058042552,3.0296335918\H,-6.07262  
33431,1.6943900409,3.8191980997\C,-5.3536098491,0.5393426765,2.1454505  
411\H,-6.1281890514,-0.2312201121,2.2313923249\C,-1.3189214841,2.30853  
62148,-0.3064407628\C,0.0344939907,1.9542877104,-0.2568603511\C,1.0928  
749146,2.9092153931,-0.3554145755\C,0.7525171077,4.239205422,-0.566277  
2247\H,1.5440914019,4.9940589642,-0.6291738224\C,-0.6019311725,4.65112  
25755,-0.7251330264\C,-1.6592557121,3.676075416,-0.6087655192\C,-3.002  
3035663,4.1081113959,-0.8314589907\H,-3.8122750312,3.3745125542,-0.787  
9664687\C,-3.2899887362,5.4345523055,-1.1165698748\H,-4.3279617563,5.7  
393311028,-1.2901851329\C,-2.2499150226,6.3995231021,-1.1954991005\H,-  
2.4913545271,7.4449426078,-1.4166503605\C,-0.9331135694,6.0108812041,-  
1.0079707406\H,-0.1199629078,6.7418832511,-1.0841449758\C,5.507424527,  
-1.9799487648,-0.6462756124\C,5.7332383628,-2.6258229325,0.5944301218\  
H,6.6974131917,-3.1147274114,0.7628098514\C,4.7422900839,-2.6432061224  
,1.5681126908\H,4.9366632098,-3.1704227643,2.5066744942\C,3.4826852619  
,-2.0242660031,1.3359490297\C,3.2925557205,-1.3551303864,0.1026124419\  
H,2.3864232925,-0.7752134553,-0.0674600762\C,4.2719167401,-1.337346728



9,-0.8842371727\H,4.0715122666,-0.7980083226,-1.8111737752\C,2.4243284  
63,-2.085415398,2.3414162675\C,2.7742866739,-2.3043027011,3.7846519632  
\H,1.977934921,-1.938747998,4.4503862954\H,3.7182272306,-1.7915913647,  
4.0242445019\H,2.9152570526,-3.3825713955,3.9827122863\N,1.1670986846,  
-1.9316582273,-1.9681857686\H,0.9064612267,-1.8290934696,0.9306302545\C  
,0.001727325,-1.9543594494,2.8028848173\C,-0.8927014395,-0.8728826818,  
2.7090198727\H,-0.6649814518,-0.04195348,2.0361814702\C,-2.0670718269,  
-0.8865656019,3.472273435\H,-2.7576357564,-0.040227811,3.4115724831\C,  
-2.3628034427,-1.9825228951,4.2986188718\C,-1.4788378274,-3.0713973192  
,4.3619940306\H,-1.7140236888,-3.9374693072,4.9895917411\C,-0.29268452  
49,-3.064200697,3.6146621222\H,0.3876648233,-3.920014983,3.6397730129\  
C,2.5225718758,2.4890948692,-0.2032310232\C,3.3743850401,2.4405577545,  
-1.3377912777\C,3.0301132696,2.1684363662,1.0806741503\C,4.7252924312,  
2.0937965683,-1.1593423182\C,4.3888207092,1.8213396146,1.2120583496\C,  
5.2558683364,1.7832045236,0.1071756871\H,5.3784805318,2.050638101,-2.0  
399869305\H,4.7752711403,1.5679884963,2.2070653175\C,-3.3299635352,-2.  
1427305298,-1.5498028955\C,-3.0031768513,-3.4006491678,-0.9835164015\C  
,-3.652913974,-2.0434977074,-2.9288657066\C,-3.0129332004,-4.541714293  
1,-1.8091690507\C,-3.6524698768,-3.2090170047,-3.7150768991\C,-3.33938  
59609,-4.4710042898,-3.1746567406\H,-2.7500227273,-5.5123236608,-1.370  
1425324\H,-3.9070801517,-3.1285915472,-4.7794714772\H,-3.2881810658,-1  
.9918374869,4.8841754129\C,-3.9892596982,-0.7060132429,-3.5506253105\H  
,-3.0978063737,-0.0527692247,-3.5756229508\C,-2.6055070524,-3.51783215  
52,0.4719721779\C,-3.3682153457,-5.7100682983,-4.0425864427\H,-2.92788  
56083,-6.5783446609,-3.5235583233\C,6.7084647549,1.3895442241,0.258585  
2043\H,7.380990023,2.22521971,-0.0120961689\C,2.8251982003,2.691291689  
1,-2.7250190876\C,2.3809728092,3.6979452327,-2.8194102899\C,2.12907743  
32,2.1821703057,2.2956055812\H,1.3560080847,1.3962283027,2.2192629934\  
H,-3.447520457,-3.292410295,1.1504933405\H,6.939113315,1.0884421568,1.  
2942846499\H,6.9626897035,0.5444437974,-0.4063917436\H,2.7045685792,2.  
0050800856,3.219639794\H,1.5974993819,3.1456946054,2.3967130111\H,3.61  
70198671,2.5926951352,-3.4868774607\H,2.0310678612,1.9545090207,-2.945  
8165579\H,-2.8139809684,-5.5526260865,-4.98567673\H,-4.4067123242,-5.9  
741113411,-4.3202944694\H,-4.3535512415,-0.8277108726,-4.5845339122\H,  
-4.7641683424,-0.1729857254,-2.9704181282\H,-2.2482280478,-4.535764616  
2,0.7020375143\H,-1.796646866,-2.8033903122,0.69824126\O,6.5324180762,  
-2.0053086115,-1.5234779937\C,6.3558376587,-1.4023631952,-2.8179404671  
\H,6.1447137508,-0.3222126119,-2.7275946868\H,7.3095933798,-1.54939844  
05,-3.3449558872\H,5.5408786769,-1.898673105,-3.3745365358\\Version=ES  
64L-G09RevD.01\State=1-A\HF=-2819.7384087\RMSE=5.831e-09\RMSF=1.705e-0  
6\Dipole=2.3402782,-1.2692266,4.1037021\Quadrupole=12.1378309,-8.36077  
78,-3.7770531,-11.5491766,-4.2608599,-16.0409702\PG=C01 [X(C53H48N1O5P  
1)]\@

### TRIM/5 Type I Z

1\1\GINC-WORKER\FOpt\RTSPSS\def2SVP\C53H48N1O4P1\JHIOE\26-Jul-2018  
\O\#p tpsstps\def2svp empiricaldispersion=gd3 int=ultrafine opt scrf  
=(smd,solvent=ch2cl2,read)\title\0,1\P,-0.8276606014,-0.0187045862,-  
1.5169770907\O,-2.1610960164,0.8541350707,-0.9842865353\O,0.3519308611  
,0.614127009,-0.4737541777\O,-0.6032920756,0.3557444103,-2.950936586\O  
,-0.930217258,-1.4682031005,-1.0406614122\C,-1.6072258536,1.7747271701  
,1.1514785431\C,-2.3907532762,0.9133267788,0.3787113357\C,-3.446006128  
1,0.1169148172,0.9233812724\C,-3.6557033344,0.1729748074,2.2957380914\  
H,-4.4681690603,-0.411936594,2.7408164762\C,-2.8321669623,0.9592641972  
,3.1514969581\C,-1.7830315181,1.7691004903,2.5816113589\C,-0.927589927  
9,2.4889331862,3.4704746785\H,-0.1017634222,3.0757951547,3.0584327498\  
C,-1.1185168863,2.4400050377,4.8436361397\H,-0.443989304,2.9948479147,  
5.5050120556\C,-2.1766996833,1.6720562873,5.4001633756\H,-2.3209993622  
,1.6477215126,6.4857981823\C,-3.0122625307,0.9445155422,4.5679123213\H  
,-3.8211084355,0.3335342287,4.9846317358\C,-0.5623129576,2.6080756227,  
0.4907001058\C,0.4257540357,1.977207779,-0.2719593086\C,1.5678291966,2.  
6683252869,-0.7825743365\C,1.6384263532,4.042066101,-0.5954234547\H,2.  
5105530334,4.5929654265,-0.9642132462\C,0.6017667416,4.7614690356,0.0  
678751553\C,-0.5188545481,4.0413709944,0.622774083\C,-1.5570940343,4.7  
888708537,1.2572260683\H,-2.4290788024,4.2586508921,1.6517161694\C,-1.  
4814219618,6.1697616662,1.3632108865\H,-2.2940549781,6.7228811052,1.84  
70024004\C,-0.3629718229,6.8744721332,0.8418805781\H,-0.3131792559,7.9  
647753059,0.9361598954\C,0.6539064614,6.1815368838,0.204099413\H,1.514  
6336341,6.7155058426,-0.2146028399\C,4.925782249,-2.5530092491,3.83338

38676\C,4.9710513744,-2.2533041726,2.4520963771\H,5.9413666348,-2.1320  
595609,1.9573478451\C,3.8035874243,-2.1035162904,1.7059059584\H,3.8743  
369168,-1.8492763819,0.6454273506\C,2.5345209757,-2.2279257364,2.32482  
72581\C,2.4828489132,-2.4880906057,3.712820841\H,1.5174053448,-2.57753  
31665,4.2192330536\C,3.6611568124,-2.6642600415,4.4460231295\H,3.59854  
4988,-2.8876845557,5.5167095567\C,1.289601794,-2.0044578777,1.57058475  
88\C,0.1332430703,-1.32384822,2.2394109419\H,-0.6352773219,-1.04041838  
89,1.5073643195\H,0.4795702392,-0.4345740287,2.7893881683\H,-0.3168826  
081,-2.0139269294,2.9773122727\N,1.1363501123,-2.3399067772,0.31093222  
66\H,0.2483906631,-1.9742996317,-0.1974988486\C,1.9901194404,-3.116055  
3046,-0.5334965307\C,2.2450984235,-2.6336089361,-1.8295660933\H,1.8247  
362073,-1.677909186,-2.1527425539\C,3.0580938678,-3.3824223145,-2.6913  
95739\H,3.2689965324,-3.0006447174,-3.6956611479\C,3.5987136306,-4.607  
1362586,-2.2694761201\C,3.3126261359,-5.0935153182,-0.9822806224\H,3.7  
148843706,-6.0586067401,-0.6567224715\C,2.5049581184,-4.354913102,-0.1  
095201495\H,2.2692804865,-4.731912988,0.889599199\C,2.6887335779,1.891  
1750114,-1.400731072\C,2.8410456697,1.8113453196,-2.8051637534\C,3.606  
7263762,1.2326841637,-0.5407317457\C,3.9104845766,1.0568455387,-3.3290  
221326\C,4.6626398419,0.4962142807,-1.1049017307\C,4.8302401702,0.3912  
446582,-2.4997123966\H,4.0238548653,0.9876379485,-4.418106933\H,5.3748  
14275,-0.0061570828,-0.4384558324\C,-4.3165334672,-0.7129898771,0.0328  
675197\C,-4.2556363193,-2.1298525711,0.0787151121\C,-5.2319563775,-0.0  
687524196,-0.8409292485\C,-5.1146783393,-2.8749822757,-0.7513155168\C,  
-6.0720392062,-0.8535593764,-1.6512019794\C,-6.0279989213,-2.259783946  
4,-1.626114372\H,-5.059945426,-3.9703397563,-0.7173212699\H,-6.7821285  
416,-0.3499728454,-2.31928434\H,4.2331579894,-5.1891802442,-2.94615272  
76\C,6.2003309209,-2.7372011947,4.6181174878\H,6.848030984,-1.84581034  
04,4.529325248\H,5.9979433297,-2.9171435766,5.6864275966\H,6.779615056  
6,-3.5932592347,4.22470431\C,-5.3146627956,1.4409614811,-0.9045234415\  
H,-4.4101794958,1.8616381246,-1.3809350109\C,-3.2519350809,-2.84336273  
07,0.9585239473\C,-6.9117859402,-3.0803130703,-2.5396811853\H,-7.89941  
05815,-2.6066274991,-2.6796721883\C,5.9561992796,-0.4373798828,-3.0777  
820071\H,6.0040942086,-0.301451055,-4.1692177468\C,1.8492517187,2.4851  
701213,-3.726381206\H,1.7646331245,3.565779423,-3.5127312055\C,3.44238  
71693,1.3147486851,0.9610899415\H,3.3442609196,2.3620445065,1.29896701  
88\H,-3.3673461566,-2.5807811747,2.0244867413\H,4.2988879547,0.8588430  
51,1.4832654598\H,2.5265688612,0.7874531023,1.2854071457\H,6.926858270  
3,-0.173592423,-2.6197155355\H,5.7909811465,-1.5144289833,-2.883411443  
9\H,2.1426782602,2.3638016334,-4.7829859333\H,0.8476232198,2.038066426  
7,-3.5869485771\H,-3.352991868,-3.9375679003,0.8621858497\H,-2.2300409  
974,-2.5584001925,0.6536652629\H,-7.0657953811,-4.1001457807,-2.146931  
0397\H,-6.4531107132,-3.178123456,-3.5429738163\H,-6.1915414699,1.7664  
391658,-1.4887730518\H,-5.3846985025,1.8867468348,0.1040466993\|Versio  
n=ES64L-G09RevD.01\State=1-A\HF=-2744.5683203\RMSD=2.792e-09\RMSF=1.53  
7e-06\Dipole=4.0253688,-2.7545032,4.7228696\Quadrupole=5.6749485,3.162  
6588,-8.8376074,-17.3017142,0.7996482,-5.2729635\PG=C01 [X(C53H48N1O4P  
1)]\@

### TRIM/5Type II Z

1\1\GINC-LOGIN\Opt\RTPSSTPSS\def2SVP\C53H48N1O4P1\JHIOE\26-Jul-2018\0  
\#p tpsstps\def2svp empiricaldispersion=gd3 int=ultrafine opt scrf=(  
smd,solvent=ch2cl2,read)\title\0,1\P,-0.8097299545,0.0198445938,-1.5  
945530372\O,-2.1085145285,0.9344808595,-1.052246945\O,0.3671978948,0.5  
176097658,-0.475648838\O,-0.5186893,0.4696256823,-2.9945337106\O,-1.00  
36896992,-1.4509188757,-1.2224842133\C,-1.5749649858,1.7362848631,1.13  
56435565\C,-2.3830695381,0.9577767616,0.3025340357\C,-3.5105827685,0.2  
17085438,0.7753483372\C,-3.7809370864,0.2493543802,2.1373054442\H,-4.6  
468313523,-0.2958476192,2.5282559848\C,-2.9442341304,0.9496777062,3.05  
2845913\C,-1.8113368643,1.6930931304,2.5571085168\C,-0.9398044202,2.30  
79429318,3.5066323905\H,-0.0519217694,2.8384100405,3.1509170338\C,-1.1  
911936326,2.2240387445,4.8682567912\H,-0.5020425529,2.6960445026,5.577  
178377\C,-2.3297758177,1.5251267792,5.3521189045\H,-2.5204817245,1.472  
1972461,6.4295310129\C,-3.1849246903,0.8986085014,4.459355235\H,-4.054  
182749,0.3373693206,4.8204023524\C,-0.4538064189,2.5245452204,0.546572  
7645\C,0.5211981333,1.8636608683,-0.2080448611\C,1.7263613449,2.499070  
215,-0.6410704833\C,1.8703652434,3.8587841917,-0.4023862125\H,2.790265  
6826,4.3660265056,-0.7135255294\C,0.8510074624,4.6175092539,0.24362674  
5\C,-0.3289092719,3.9474308315,0.7347048608\C,-1.3419808179,4.73428700  
6,1.362242067\H,-2.2556718096,4.2452425253,1.7127178886\C,-1.189994598

7.6.1043701714,1.5167978622\H,-1.9846999815,6.6886019313,1.99370251\C,  
-0.016405054,6.7584566999,1.0544021871\H,0.0927490311,7.8405088005,1.1  
861714389\C,0.9804257184,6.026945076,0.4282641982\H,1.8850707313,6.521  
5805412,0.0566556713\C,5.9911932286,-3.230915003,1.3741516144\C,4.9655  
437662,-2.5503912325,2.0689385623\H,5.1711954174,-2.1343277256,3.06141  
74124\C,3.6990128986,-2.382970161,1.5112635522\H,2.9449573362,-1.82370  
29986,2.0681745493\C,3.4091588071,-2.8799930188,0.2155719435\C,4.43776  
71284,-3.5499938596,-0.4876332329\H,4.2516423537,-3.9486727146,-1.4885  
184423\C,5.6976438559,-3.7323951039,0.0899780174\H,6.4721195423,-4.265  
9195208,-0.4717635652\C,2.1246455677,-2.6038838736,-0.4501041127\C,2.1  
031493245,-2.3807928333,-1.9327053734\H,1.0793783668,-2.2237135989,-2.  
2998541595\H,2.54834036,-3.2437090406,-2.4561352622\H,2.724506846,-1.4  
986418542,-2.1720186175\N,0.9808195457,-2.4564099052,0.1785085768\H,0.  
1575898164,-2.0741492039,-0.4141870135\C,0.6452981065,-2.6673992696,1.  
5516323296\C,-0.08046437,-1.6543428462,2.2036730258\H,-0.3286411148,-0.  
7356338368,1.6645713625\C,-0.4608594418,-1.8358216081,3.5401603669\H,  
-1.0158501699,-1.0434142073,4.0525993595\C,-0.1358111935,-3.0252359779  
,4.2111391094\C,0.5663461447,-4.0415164428,3.5403963341\H,0.8053461937  
,-4.9777435911,4.0557941012\C,0.9586294381,-3.8714071961,2.2068613996\  
H,1.4981520364,-4.6601092689,1.6746424425\C,2.8346696818,1.6738028922,  
-1.2195898909\C,3.0475415421,1.5931387508,-2.6177938971\C,3.6841684457  
,0.9751525781,-0.3241862073\C,4.0989919581,0.7885358853,-3.0969298415\  
C,4.7264185072,0.1860627119,-0.8449761814\C,4.9471015329,0.0730104327,  
-2.2296335174\H,4.2575471984,0.7182507766,-4.1803980947\H,5.3772096599  
,-0.3577735763,-0.1498570115\C,-4.3713129955,-0.5521565352,-0.17706180  
07\C,-4.3417993118,-1.9694849787,-0.1770240662\C,-5.2251838776,0.14366  
87412,-1.0725581217\C,-5.1730686174,-2.666666411,-1.0747881523\C,-6.04  
14115885,-0.5930633484,-1.9487063076\C,-6.0322913922,-2.0008507132,-1.  
9663959601\H,-5.1403445819,-3.7633671077,-1.0802684207\H,-6.7028541697  
,-0.0514232507,-2.636736043\H,-0.4372695534,-3.1661820005,5.2544659064  
\C,7.3636077886,-3.3772266237,1.9810802089\H,7.3013117327,-3.709577191  
9,3.032523965\H,7.983186685,-4.0939813299,1.417773804\H,7.8862369604,-  
2.4015839271,1.9823715542\C,-5.2572929574,1.656100284,-1.091927173\H,-  
4.3051709951,2.0614366602,-1.4807414606\C,-3.4059582913,-2.72822845,0.7  
382541372\C,-6.9377175462,-2.7677761638,-2.9050142348\H,-6.9290774109,  
-2.3306381603,-3.9196008744\C,6.0338029153,-0.8276251994,-2.7741591002  
\H,6.5118872965,-0.3901356502,-3.6683459761\C,2.1405583371,2.330699242  
9,-3.5761803538\H,2.0917702593,3.408367351,-3.3375488361\C,3.471163046  
3,1.0751529413,1.1706237596\H,2.5056372865,0.6258852891,1.4672716134\H  
,-3.6680421275,-2.5942743021,1.8031722512\H,6.8144010182,-1.022238643,  
-2.0190985603\H,5.6141821607,-1.8068015947,-3.0761464337\H,2.490009562  
8,2.2225642537,-4.6170448172\H,1.1128261932,1.927955534,-3.5064259858\  
H,4.272939684,0.5586065093,1.7221159793\H,3.4438343653,2.1288772069,1.  
5020135874\H,-3.4284451821,-3.8087205765,0.5167437722\H,-2.3732514837,  
-2.3653601163,0.6037266124\H,-6.6375628502,-3.8267887841,-2.9808338373  
\H,-7.9867425606,-2.7410171958,-2.5518186145\H,-6.0743045744,2.0285387  
318,-1.732264665\H,-5.3940202064,2.071014808,-0.0768231227\Version=ES  
64L-G09RevD.01\State=1\HF=-2744.571283\RMSD=4.930e-09\RMSF=1.426e-06  
\Dipole=4.4526636,-3.1427545,3.5680717\Quadrupole=12.8721156,4.3863326  
,-17.2584483,-21.5761061,-6.4216927,2.5011674\PG=C01 [X(C53H48N1O4P1)]  
\@

**TRIM/4 Type I E**

1\1\GINC-WORKER1\FOpt\RTSPSS\def2SVP\C53H45F3N1O4P1\JHIOE\02-Aug-20  
18\0\#p tpsstpss/def2svp empiricaldispersion=gd3 int=ultrafine opt sc  
rf=(smd,solvent=ch2cl2,read)\title\0,1\P,0.3163159164,-0.8894784591,  
-1.2631738429\O,-1.3021461766,-0.7180804532,-1.6626594162\O,0.52046643  
93,0.5088179959,-0.3370009719\O,1.085099841,-0.8532045847,-2.552413411  
9\O,0.5116161629,-1.9913100852,-0.2186838212\C,-2.2359909677,0.9947419  
917,-0.2624737919\C,-2.2149398761,-0.3357319787,-0.6956251942\C,-3.147  
6935694,-1.3194969825,-0.2417433855\C,-4.0893177774,-0.9360846323,0.70  
42643154\H,-4.8303991416,-1.6635867222,1.0530805355\C,-4.1105628263,0.  
3793746062,1.2508897293\C,-3.1598145821,1.3588659511,0.7834988915\C,-3.  
1479310054,2.6398172466,1.4147093142\H,-2.4015820439,3.3783703566,1.1  
092602732\C,-4.0534402409,2.9523028548,2.4171962026\H,-4.0150112107,3.  
937628835,2.8942882199\C,-5.0188586209,2.0014785685,2.842848495\H,-5.7  
27300462,2.261128852,3.6368348621\C,-5.038622006,0.7384887039,2.274583  
192\H,-5.7573463149,-0.0150869859,2.6156561561\C,-1.291193191,1.983833  
5608,-0.8577023198\C,0.0804683079,1.7145528626,-0.8451643476\C,1.06743

17873,2.6530814974,-1.277732294\C,0.6312056088,3.8709146415,-1.7807504  
256\H,1.3656124439,4.616503937,-2.1046980294\C,-0.7563186068,4.1717991  
066,-1.9102626304\C,-1.738943956,3.2149976998,-1.4598656012\C,-3.11935  
99481,3.5190674244,-1.663069593\H,-3.8756358671,2.7868511662,-1.366252  
8216\C,-3.5114437452,4.7178366038,-2.2400468922\H,-4.5768118181,4.9248  
829185,-2.3899370817\C,-2.5437016466,5.6754604009,-2.6462016595\H,-2.8  
663634568,6.6212022452,-3.0951045148\C,-1.1943793018,5.4018012703,-2.4  
882780198\H,-0.4374620047,6.1233680843,-2.8164486165\C,-0.8828800829,0  
.2460135316,4.6154277667\C,0.3770643664,0.4099550446,5.2135401501\H,0.  
4588294889,0.8197266061,6.2239770572\C,1.5296266283,0.0429988689,4.515  
8344528\H,2.4964132627,0.1759963937,5.0061972658\C,1.4442106454,-0.504  
1715789,3.2117471196\C,0.1642002553,-0.6682876151,2.6298988036\H,0.056  
5595624,-1.0799965741,1.6234168856\C,-0.9872895206,-0.2918872395,3.321  
6383793\H,-1.9657188696,-0.4172866821,2.851069817\C,2.6855788705,-0.89  
15920379,2.5078824724\C,4.0103062128,-0.5155144199,3.1012345632\H,4.82  
40977242,-0.6108607383,2.3702066969\H,4.2402892878,-1.157958792,3.9699  
754937\H,3.9675448722,0.5245246914,3.4601148694\N,2.6267752344,-1.5410  
160349,1.3644755136\H,1.6956720527,-1.7036460149,0.8510909935\C,3.7376  
30717,-2.0743162615,0.6296475869\C,3.8372874363,-1.7822907395,-0.74294  
58125\H,3.0986391302,-1.1463587306,-1.2382071348\C,4.9063414361,-2.312  
5748214,-1.4767204748\H,4.9932029798,-2.0708573811,-2.5410767267\C,5.8  
565255488,-3.1393346318,-0.8571507251\C,5.7308317165,-3.4491519309,0.5  
067562789\H,6.4559495311,-4.1106576418,0.9921577858\C,4.6705393917,-2.  
9231959846,1.2555913029\H,4.5538362259,-3.1834905266,2.3115509338\C,2.  
5176874858,2.3039547446,-1.1540024716\C,3.264787621,1.9369290056,-2.30  
02561817\C,3.1309863033,2.3127900046,0.1262706823\C,4.6154208098,1.567  
9932759,-2.1409132541\C,4.4832939145,1.9470763411,0.237913802\C,5.2428  
839504,1.5604009402,-0.8834692633\H,5.1869138762,1.2616135037,-3.02594  
43398\H,4.954278231,1.9557755333,1.2286411342\C,-3.1291547089,-2.70104  
19308,-0.8196371528\C,-2.6334717013,-3.7929663869,-0.0654159287\C,-3.6  
240910758,-2.9089664823,-2.1346608098\C,-2.639355368,-5.0780745702,-0.  
6434318582\C,-3.6149273442,-4.208161617,-2.6702488819\C,-3.1235519966,  
-5.3090168547,-1.9421843997\H,-2.2465548131,-5.9203611385,-0.060094866  
\H,-4.0012052694,-4.3651967406,-3.6853946131\H,6.6888174621,-3.5503094  
121,-1.4381883118\C,-2.1244900584,0.691109284,5.351167384\C,-4.1506973  
146,-1.7499149338,-2.9521495806\H,-3.3365076379,-1.0452235493,-3.20239  
99093\C,-2.0524500915,-3.5868005806,1.3158621008\C,-3.1278678191,-6.69  
55497789,-2.547598092\H,-2.642436714,-7.4292059517,-1.8822023565\C,6.6  
809941285,1.1197601583,-0.7229030255\H,7.1310488449,0.848428016,-1.692  
5614212\C,2.6112531969,1.8743760325,-3.6629300561\H,2.1872507097,2.849  
5700731,-3.9613238671\C,2.3354085172,2.6876748906,1.3575382301\H,1.544  
6333601,1.9418626153,1.5552900015\H,-2.7521677627,-3.0595465918,1.9871  
617709\H,-4.6009447074,-2.1003543589,-3.8958568346\H,-4.9138664335,-1.  
1761287165,-2.3956757212\H,-4.1603988906,-7.0424736433,-2.7416765087\H  
,-2.5984523576,-6.7082725367,-3.5181685584\H,-1.7876338192,-4.55070548  
16,1.7821204508\H,-1.1368507949,-2.9746128165,1.2393115229\H,7.2981221  
708,1.9167647676,-0.2678432508\H,6.75068237,0.2385995626,-0.0579303695  
\H,3.3364032053,1.5639042968,-4.4340245833\H,1.7862398287,1.1397916787  
,-3.6434603813\H,2.9818558347,2.7451336899,2.2489919456\H,1.8313449474  
,3.6630139685,1.2327952098\F,-1.9853221142,0.589860062,6.6968039031\F,  
-2.4215933805,1.9930961506,5.0888800929\F,-3.2140146627,-0.0377092597,  
5.005257809\Version=ES64L-G09RevD.01\State=1-A\HF=-3042.0902967\RMSD=  
4.267e-09\RMSF=2.942e-06\Dipole=3.7217188,-0.0619653,4.3389199\Quadrup  
ole=21.4170786,-10.0017465,-11.4153321,-13.0753119,21.9535418,-7.99031  
49\PG=C01 [X(C53H45F3N1O4P1)]\@

#### TRIM/4 Type II E

1\1\GINC-LOGIN\Fopt\RTPSSTPSS\def2SVP\C53H45F3N1O4P1\JHIOE\22-Aug-2018  
\0\#p tpsstps\def2svp empiricaldispersion=gd3 int=ultrafine opt scrf  
=(smd,solvent=ch2cl2,read)\title\0,1\p,0.2259453761,-0.5568297666,-1  
.3458442394\O,-1.3448522851,-0.1703767262,-1.7760104612\O,0.4628939796  
,0.601897109,-0.1199973085\O,1.0846632725,-0.2969543508,-2.5482107047\  
O,0.2709183027,-1.8560745133,-0.5440456619\C,-2.2712642066,1.220694620  
3,-0.0605990196\C,-2.2871961458,0.0227260762,-0.7815089779\C,-3.262581  
3081,-1.0020918219,-0.5773050589\C,-4.2273145644,-0.7932783385,0.39923  
27497\H,-4.99890582,-1.5525090574,0.5666018989\C,-4.222947318,0.369292  
7974,1.2214472953\C,-3.2170959614,1.383033568,1.0157130509\C,-3.170264  
0935,2.4804364456,1.928446001\H,-2.3858508168,3.2343828426,1.817613735  
\C,-4.0889124508,2.592192068,2.961902409\H,-4.0258566439,3.4388658127,

3.6543063191\C,-5.105839757,1.6149206765,3.1352611165\H,-5.8285505093,  
1.718336894,3.9519605395\C,-5.1652129989,0.5240124952,2.2828434257\H,-  
5.9280857698,-0.2506228103,2.4205131385\C,-1.2468623026,2.2607711483,-  
0.3701626559\C,0.1090372967,1.9167732199,-0.3473103817\C,1.1605188916,  
2.8755719525,-0.4719030647\C,0.8095572931,4.1976859715,-0.7106341072\H  
,1.5943780889,4.9570799651,-0.7978734575\C,-0.5508264816,4.596012574,-  
0.8589987168\C,-1.6008282489,3.6202274804,-0.6922218637\C,-2.951566655  
7,4.0412010851,-0.8863654074\H,-3.7567952007,3.3061430587,-0.797189870  
6\C,-3.2523566643,5.3583796251,-1.1999977417\H,-4.2960633017,5.6552313  
186,-1.3514586649\C,-2.2187932934,6.3240198284,-1.3348072764\H,-2.4703  
328161,7.3620268516,-1.5782718781\C,-0.8956748159,5.9460116019,-1.1707  
947706\H,-0.0879983692,6.6777509138,-1.2864145419\C,5.3719714849,-2.01  
37081976,-1.2369653263\C,5.6608376409,-2.7874425826,-0.1000894707\H,6.  
5638363876,-3.4028614144,-0.0682059513\C,4.7849968129,-2.7743438316,0.  
9898450395\H,5.0041277727,-3.3965925009,1.8618835462\C,3.6123973869,-1  
.985596947,0.9483999383\C,3.3538885625,-1.1914516378,-0.1892866011\H,2  
.5174347349,-0.4920624369,-0.1918477283\C,4.2157320596,-1.2180527946,-  
1.2845931084\H,3.9853699556,-0.6089499782,-2.1614452777\C,2.6742680762  
,-1.9877127774,2.0909129789\C,3.2126837664,-2.1131468051,3.4814172168\H  
,2.4975605829,-1.745696816,4.2323403629\H,4.1604678997,-1.5568079362,  
3.5577108895\H,3.4320757455,-3.1741128348,3.7032780176\N,1.3939759046,  
-1.8588003544,1.8393777863\H,1.0383403156,-1.8111326874,0.8114666901\C  
,0.3142902082,-1.8511404682,2.7824219079\C,-0.6379627048,-0.8215491559  
,2.6723540052\H,-0.5151474741,-0.0524000745,1.9057552303\C,-1.73376936  
89,-0.8084239758,3.5438353705\H,-2.4685026189,-0.0010058232,3.4702932\H  
,1.8967653278,-1.8306286139,4.4926545398\C,-0.958118499,-2.871674954  
7,4.5713889071\H,-1.0918301174,-3.6819619521,5.295609273\C,0.153848784  
4,-2.8885588488,3.7181543823\H,0.8733106992,-3.711208752,3.7564963884\H  
,2.5887551912,2.4601595837,-0.2957070629\C,3.450865982,2.3599837055,-  
1.4155264917\C,3.0777306945,2.1806744977,1.0078699684\C,4.7976079747,2  
.0027928387,-1.2076484745\C,4.4294797202,1.8283467381,1.1691799035\C,5  
.3085228904,1.7347658839,0.0742005131\H,5.4592869477,1.9060051213,-2.0  
770131671\H,4.802353483,1.6124049336,2.1785931569\C,-3.2279713327,-2.2  
578156425,-1.3907465976\C,-2.8370877796,-3.4794128676,-0.7849606402\C,  
-3.5867268024,-2.2256965483,-2.7636652992\C,-2.815553718,-4.6495869206  
, -1.5674190376\C,-3.5528593719,-3.4195009039,-3.5062451919\C,-3.171040  
8216,-4.6445819525,-2.9278002258\H,-2.500590833,-5.5907145311,-1.09945  
27063\H,-3.8324398565,-3.3898572323,-4.5669249957\H,-2.7629321306,-1.8  
216424859,5.1625719615\C,6.328723252,-1.9588991012,-2.4017675784\C,-3.  
9937306629,-0.9287952708,-3.4281358845\H,-3.1304890435,-0.2429863694,-  
3.5061677186\C,-2.4020761013,-3.528010294,0.6635793258\C,-3.1641217774  
, -5.9189130049,-3.7436263389\H,-2.5516096189,-6.701536712,-3.263981408  
6\C,6.7404789213,1.289737706,0.2673553974\H,7.3699213323,1.5605858817,  
-0.5966732345\C,2.9217350787,2.5667425591,-2.8175307593\H,2.5164086259  
,3.5843384259,-2.9609037738\C,2.1591655375,2.2467131178,2.2080710484\H  
,1.3589656093,1.4883007433,2.1333671045\H,-3.2309486878,-3.2939306233,  
1.3551798234\H,7.182924419,1.7332610285,1.1769539039\H,6.791743079,0.1  
900222626,0.3821372598\H,2.7138827736,2.0635434995,3.1434890402\H,1.66  
22006571,3.2307834809,2.2859646622\H,3.7154286286,2.4040307707,-3.5660  
953968\H,2.1024387492,1.851471339,-3.0152640166\H,-2.7715971527,-5.744  
6953686,-4.7612946289\H,-4.1893920522,-6.3216848257,-3.856891111\H,-4.  
3819709136,-1.1072660095,-4.4448783773\H,-4.7724189972,-0.402046863,-2  
.8472267707\H,-2.0139473519,-4.5270426213,0.9248780175\H,-1.6045475066  
, -2.787667826,0.8404682805\F,6.9534601402,-0.7472456089,-2.4706521443\F  
,7.3015552165,-2.897567185,-2.3296941767\F,5.6931105668,-2.1276685326  
, -3.5888475325\Version=ES64L-G09RevD.01\State=1-A\HF=-3042.0901472\RM  
SD=7.680e-09\RMSF=3.481e-06\Dipole=1.1431061,-1.4123917,6.0523839\Quad  
rupole=-0.7270104,2.1012171,-1.3742067,-12.8358816,13.4241385,-20.0330  
695\PG=C01 [X(C53H45F3N1O4P1)]\@

#### TRIM/4 Type I Z

1\1\GINC-WORKER\Opt\RTPSS\def2SVP\C53H48N1O4P1\JHIOE\26-Jul-2018  
\0\#p tpsstps/def2svp empiricdispersion=gd3 int=ultrafine opt scrf  
=(smd,solvent=ch2cl2,read)\title\0,1\p,-0.8276606014,-0.0187045862,-  
1.5169770907\O,-2.1610960164,0.8541350707,-0.9842865353\O,0.3519308611  
,0.614127009,-0.4737541777\O,-0.6032920756,0.3557444103,-2.950936586\O  
, -0.930217258,-1.4682031005,-1.0406614122\C,-1.6072258536,1.7747271701  
,1.1514785431\C,-2.3907532762,0.9133267788,0.3787113357\C,-3.446006128  
1,0.1169148172,0.9233812724\C,-3.6557033344,0.1729748074,2.2957380914\

H,-4.4681690603,-0.411936594,2.7408164762\C,-2.8321669623,0.9592641972  
,3.1514969581\C,-1.7830315181,1.7691004903,2.5816113589\C,-0.927589927  
9,2.4889331862,3.4704746785\H,-0.1017634222,3.0757951547,3.0584327498\  
C,-1.1185168863,2.4400050377,4.8436361397\H,-0.443988304,2.9948479147,  
5.5050120556\C,-2.1766996833,1.6720562873,5.4001633756\H,-2.3209993622  
,1.6477215126,6.4857981823\C,-3.0122625307,0.9445155422,4.5679123213\H  
,-3.8211084355,0.3335342287,4.9846317358\C,-0.5623129576,2.6080756227,  
0.4907001058\C,0.4257540357,1.977207779,-0.2719593086\C,1.5678291966,2  
.6683252869,-0.7825743365\C,1.6384263532,4.042066101,-0.5954234547\H,2  
.5105530334,4.5929654265,-0.9642132462\C,0.6017667416,4.7614690356,0.0  
678751553\C,-0.5188545481,4.0413709944,0.622774083\C,-1.5570940343,4.7  
888708537,1.2572260683\H,-2.4290788024,4.2586508921,1.6517161694\C,-1.  
4814219618,6.1697616662,1.3632108865\H,-2.2940549781,6.7228811052,1.84  
70024004\C,-0.3629718229,6.8744721332,0.8418805781\H,-0.3131792559,7.9  
647753059,0.9361598954\C,0.6539064614,6.1815368838,0.204099413\H,1.514  
6336341,6.7155058426,-0.2146028399\C,4.925782249,-2.5530092491,3.83338  
38676\C,4.9710513744,-2.2533041726,2.4520963771\H,5.9413666348,-2.1320  
595609,1.9573478451\C,3.8035874243,-2.1035162904,1.7059059584\H,3.8743  
369168,-1.8492763819,0.6454273506\C,2.5345209757,-2.2279257364,2.32482  
72581\C,2.4828489132,-2.4880906057,3.712820841\H,1.5174053448,-2.57753  
31665,4.2192330536\C,3.6611568124,-2.6642600415,4.4460231295\H,3.59854  
4988,-2.8876845557,5.5167095567\C,1.289601794,-2.0044578777,1.57058475  
88\C,0.1332430703,-1.32384822,2.2394109419\H,-0.6352773219,-1.04041838  
89,1.5073643195\H,0.4795702392,-0.4345740287,2.7893881683\H,-0.3168826  
081,-2.0139269294,2.9773122727\N,1.1363501123,-2.3399067772,0.31093222  
66\H,0.2483906631,-1.9742996317,-0.1974988486\C,1.9901194404,-3.116055  
3046,-0.5334965307\C,2.2450984235,-2.6336089361,-1.8295660933\H,1.8247  
362073,-1.677909186,-2.1527425539\C,3.0580938678,-3.3824223145,-2.6913  
95739\H,3.2689965324,-3.0006447174,-3.6956611479\C,3.5987136306,-4.607  
1362586,-2.2694761201\C,3.3126261359,-5.0935153182,-0.9822806224\H,3.7  
148843706,-6.0586067401,-0.6567224715\C,2.5049581184,-4.354913102,-0.1  
095201495\H,2.2692804865,-4.731912988,0.889599199\C,2.6887335779,1.891  
1750114,-1.400731072\C,2.8410456697,1.8113453196,-2.8051637534\C,3.606  
7263762,1.2326841637,-0.5407317457\C,3.9104845766,1.0568455387,-3.3290  
221326\C,4.6626398419,0.4962142807,-1.1049017307\C,4.8302401702,0.3912  
446582,-2.4997123966\H,4.0238548653,0.9876379485,-4.418106933\H,5.3748  
14275,-0.0061570828,-0.4384558324\C,-4.3165334672,-0.7129898771,0.0328  
675197\C,-4.2556363193,-2.1298525711,0.0787151121\C,-5.2319563775,-0.0  
687524196,-0.8409292485\C,-5.1146783393,-2.8749822757,-0.7513155168\C,  
-6.0720392062,-0.8535593764,-1.6512019794\C,-6.0279989213,-2.259783946  
4,-1.626114372\H,-5.059945426,-3.9703397563,-0.7173212699\H,-6.7821285  
416,-0.3499728454,-2.31928434\H,4.2331579894,-5.1891802442,-2.94615272  
76\C,6.2003309209,-2.7372011947,4.6181174878\H,6.848030984,-1.84581034  
04,4.529325248\H,5.9979433297,-2.9171435766,5.6864275966\H,6.779615056  
6,-3.5932592347,4.22470431\C,-5.3146627956,1.4409614811,-0.9045234415\  
H,-4.4101794958,1.8616381246,-1.3809350109\C,-3.2519350809,-2.84336273  
07,0.9585239473\C,-6.9117859402,-3.0803130703,-2.5396811853\H,-7.89941  
05815,-2.6066274991,-2.6796721883\C,5.9561992796,-0.4373798828,-3.0777  
820071\H,6.0400942086,-0.301451055,-4.1692177468\C,1.8492517187,2.4851  
701213,-3.726381206\H,1.7646331245,3.565779423,-3.5127312055\C,3.44238  
71693,1.3147486851,0.9610899415\H,3.3442609196,2.3620445065,1.29896701  
88\H,-3.3673461566,-2.5807811747,2.0244867413\H,4.2988879547,0.8588430  
51,1.4832654598\H,2.5265688612,0.7874531023,1.2854071457\H,6.926858270  
3,-0.173592423,-2.6197155355\H,5.7909811465,-1.5144289833,-2.883411443  
9\H,2.1426782602,2.3638016334,-4.7829859333\H,0.8476232198,2.038066426  
7,-3.5869485771\H,-3.352991868,-3.9375679003,0.8621858497\H,-2.2300409  
974,-2.5584001925,0.6536652629\H,-7.0657953811,-4.1001457807,-2.146931  
0397\H,-6.4531107132,-3.178123456,-3.5429738163\H,-6.1915414699,1.7664  
391658,-1.4887730518\H,-5.3846985025,1.8867468348,0.1040466993\|Versio  
n=ES64L-G09RevD.01\State=1-A\HF=-2744.5683203\RMSD=2.792e-09\RMSF=1.53  
7e-06\Dipole=4.0253688,-2.7545032,4.7228696\Quadrupole=5.6749485,3.162  
6588,-8.8376074,-17.3017142,0.7996482,-5.2729635\PG=C01 [X(C53H48N1O4P  
1)]\@

#### TRIM/4 Type II Z

1\1\GINC-LOGIN\FOpt\RTPSSSTPSS\def2SVP\C53H48N1O4P1\JHIOE\26-Jul-2018\0  
\#p tpsstps\def2svp empiricaldispersion=gd3 int=ultrafine opt scrf=(  
smd,solvent=ch2cl2,read)\title\0,1P,-0.8097299545,0.0198445938,-1.5  
945530372\O,-2.1085145285,0.9344808595,-1.052246945\O,0.3671978948,0.5

176097658,-0.475648838\O,-0.5186893,0.4696256823,-2.9945337106\O,-1.00  
36896992,-1.4509188757,-1.2224842133\C,-1.5749649858,1.7362848631,1.13  
56435565\C,-2.3830695381,0.9577767616,0.3025340357\C,-3.5105827685,0.2  
17085438,0.7753483372\C,-3.7809370864,0.2493543802,2.1373054442\H,-4.6  
468313523,-0.2958476192,2.5282559848\C,-2.9442341304,0.9496777062,3.05  
2845913\C,-1.8113368643,1.6930931304,2.5571085168\C,-0.9398044202,2.30  
79429318,3.5066323905\H,-0.0519217694,2.8384100405,3.1509170338\C,-1.1  
911936326,2.2240387445,4.8682567912\H,-0.5020425529,2.6960445026,5.577  
178377\C,-2.3297758177,1.5251267792,5.3521189045\H,-2.5204817245,1.472  
1972461,6.4295310129\C,-3.1849246903,0.8986085014,4.459355235\H,-4.054  
182749,0.3373693206,4.8204023524\C,-0.4538064189,2.5245452204,0.546572  
7645\C,0.5211981333,1.8636608683,-0.2080448611\C,1.7263613449,2.499070  
215,-0.6410704833\C,1.8703652434,3.8587841917,-0.4023862125\H,2.790265  
6826,4.3660265056,-0.7135255294\C,0.8510074624,4.6175092539,0.24362674  
5\C,-0.3289092719,3.9474308315,0.7347048608\C,-1.3419808179,4.73428700  
6,1.362242067\H,-2.2556718096,4.2452425253,1.7127178886\C,-1.189994598  
7,6.1043701714,1.5167978622\H,-1.9846999815,6.6886019313,1.99370251\C,  
-0.016405054,6.7584566999,1.0544021871\H,0.0927490311,7.8405088005,1.1  
861714389\C,0.9804257184,6.026945076,0.4282641982\H,1.8850707313,6.521  
5805412,0.0566556713\C,5.9911932286,-3.230915003,1.3741516144\C,4.9655  
437662,-2.5503912325,2.0689385623\H,5.1711954174,-2.1343277256,3.06141  
74124\C,3.6990128986,-2.382970161,1.5112635522\H,2.9449573362,-1.82370  
29986,2.0681745493\C,3.4091588071,-2.8799930188,0.2155719435\C,4.43776  
71284,-3.5499938596,-0.4876332329\H,4.2516423537,-3.9486727146,-1.4885  
184423\C,5.6976438559,-3.7323951039,0.0899780174\H,6.4721195423,-4.265  
9195208,-0.4717635652\C,2.1246455677,-2.6038838736,-0.4501041127\C,2.1  
031493245,-2.3807928333,-1.9327053734\H,1.0793783668,-2.2237135989,-2.  
2998541595\H,2.54834036,-3.2437090406,-2.4561352622\H,2.724506846,-1.4  
986418542,-2.1720186175\N,0.9808195457,-2.4564099052,0.1785085768\H,0.  
1575898164,-2.0741492039,-0.4141870135\C,0.6452981065,-2.6673992696,1.  
5516323296\C,-0.08046437,-1.6543428462,2.2036730258\H,-0.3286411148,-0  
.7356338368,1.6645713625\C,-0.4608594418,-1.8358216081,3.5401603669\H,  
-1.0158501699,-1.0434142073,4.0525993595\C,-0.1358111935,-3.0252359779  
,4.2111391094\C,0.5663461447,-4.0415164428,3.5403963341\H,0.8053461937  
,-4.9777435911,4.0557941012\C,0.9586294381,-3.8714071961,2.2068613996\  
H,1.4981520364,-4.6601092689,1.6746424425\C,2.8346696818,1.6738028922,  
-1.2195898909\C,3.0475415421,1.5931387508,-2.6177938971\C,3.6841684457  
,0.9751525781,-0.3241862073\C,4.0989919581,0.7885358853,-3.0969298415\  
C,4.7264185072,0.1860627119,-0.8449761814\C,4.9471015329,0.0730104327,  
-2.2296335174\H,4.257371984,0.7182507766,-4.1803980947\H,5.3772096599  
,-0.3577735763,-0.1498570115\C,-4.3713129955,-0.5521565352,-0.17706180  
07\C,-4.3417993118,-1.9694849787,-0.1770240662\C,-5.2251838776,0.14366  
87412,-1.0725581217\C,-5.1730686174,-2.666666411,-1.0747881523\C,-6.04  
14115885,-0.5930633484,-1.9487063076\C,-6.0322913922,-2.0008507132,-1.  
9663959601\H,-5.1403445819,-3.7633671077,-1.0802684207\H,-6.7028541697  
,-0.0514232507,-2.636736043\H,-0.4372695534,-3.1661820005,5.2544659064  
\C,7.3636077886,-3.3772266237,1.9810802089\H,7.3013117327,-3.709577191  
9,3.032523965\H,7.983186685,-4.0939813299,1.417773804\H,7.8862369604,-  
2.4015839271,1.9823715542\C,-5.2572929574,1.656100284,-1.091927173\H,-  
4.3051709951,2.061436602,-1.4807414606\C,-3.4059582913,-2.72822845,0.7  
382541372\C,-6.9377175462,-2.7677761638,-2.9050142348\H,-6.9290774109,  
-2.3306381603,-3.9196008744\C,6.0338029153,-0.8276251994,-2.7741591002  
\H,6.5118872965,-0.3901356502,-3.6683459761\C,2.1405583371,2.330699242  
9,-3.5761803538\H,2.0917702593,3.408367351,-3.3375488361\C,3.471163046  
3,1.0751529413,1.1706237596\H,2.5056372865,0.6258852891,1.4672716134\H  
,-3.6680421275,-2.5942743021,1.8031722512\H,6.8144010182,-1.022238643,  
-2.0190985603\H,5.6141821607,-1.8068015947,-3.0761464337\H,2.490009562  
8,2.2225642537,-4.6170448172\H,1.1128261932,1.927955534,-3.5064259858\  
H,4.272939684,0.5586065093,1.7221159793\H,3.4438343653,2.1288772069,1.  
5020135874\H,-3.4284451821,-3.8087205765,0.5167437722\H,-2.3732514837,  
-2.3653601163,0.6037266124\H,-6.6375628502,-3.8267887841,-2.9808338373  
\H,-7.9867425606,-2.7410171958,-2.5518186145\H,-6.0743045744,2.0285387  
318,-1.732264665\H,-5.3940202064,2.071014808,-0.0768231227\Version=ES  
64L-G09RevD.01\State=1-A\HF=-2744.571283\RMSE=4.930e-09\RMSF=1.426e-06  
\Dipole=4.4526636,-3.1427545,3.5680717\Quadrupole=12.8721156,4.3863326  
, -17.2584483,-21.5761061,-6.4216927,2.5011674\PG=C01 [X(C53H48N1O4P1)]  
\@

**TRIP-H**

1\1\GINC-WORKER1\FOpt\RTPSSSTPSS\def2SVP\C50H57O4P1\JHIOE\04-Dec-2017\0

\#p tpsstps\def2svp int=ultrafine opt freq empiric\dispersion=gd3\  
title\0,1P,-0.0891632372,-1.058103076,-0.1591225391\O,-1.0804494759,  
0.0010058961,-0.9278806798\O,0.8891073119,-0.0402796098,0.6685456673\O  
,0.4738527776,-2.0396966292,-1.1157095963\O,-0.9016186117,-1.612283974  
5,1.1258095312\C,-0.7777046891,2.1682722229,0.0570841732\C,-1.60210857  
08,1.077616756,-0.2109331582\C,-2.9738667484,0.9895574961,0.1760818203  
\C,-3.5344225652,2.1099845961,0.7721485143\H,-4.5937502134,2.099487782  
7,1.0471663021\C,-2.7527852343,3.2549195258,1.1008813688\C,-1.34297405  
33,3.2722047661,0.7950742839\C,-0.5641039802,4.3707067416,1.2656701197  
\H,0.5142400227,4.3736481954,1.0868073018\C,-1.152518268,5.4235870314,  
1.948869679\H,-0.531859281,6.2535440679,2.3030675093\C,-2.5496084688,5  
.4319521812,2.1994807967\H,-3.0039071273,6.2738460158,2.7326193942\C,-  
3.3291164645,4.3635551101,1.7895282815\H,-4.4035082586,4.3439227339,2.  
0046331183\C,0.6503740691,2.1305610083,-0.3678882486\C,1.4520607464,1.  
0372837569,-0.0275890214\C,2.8504344383,0.960453799,-0.2943709254\C,3.  
4370974752,2.0409158834,-0.9380777357\H,4.5154700152,2.0271035873,-1.1  
261310469\C,2.6701894959,3.1480590619,-1.3992829008\C,1.2520776441,3.1  
879415835,-1.1430969129\C,0.4942931456,4.2602439392,-1.7015101002\H,-0  
.5891837057,4.278306711,-1.5556569918\C,1.1089940892,5.2647855412,-2.4  
321970308\H,0.5046271865,6.0735424314,-2.8567235968\C,2.5130274798,5.2  
497133906,-2.642162845\H,2.9879544432,6.0532575126,-3.2150652427\C,3.2  
737723154,4.2076234406,-2.1399491987\H,4.3544230787,4.1710594829,-2.31  
77968977\C,3.630326266,-0.2512998258,0.1133350028\C,4.0644826735,-1.17  
71237497,-0.8738242888\C,3.9226480262,-0.4749984752,1.4826999592\C,4.8  
162767416,-2.2910480821,-0.465504563\C,4.6734819353,-1.6094966298,1.83  
73275976\C,5.1348301419,-2.5272583544,0.8821344566\H,5.1537773825,-3.0  
035103505,-1.2266282129\H,4.9084848539,-1.786350109,2.8943281137\C,-3.  
6826155283,-0.3206847539,0.0212696986\C,-4.0029797938,-1.0845282766,1.  
1821575778\C,-3.9335815975,-0.8555349721,-1.2716398691\C,-4.5447101674  
,-2.3733689494,1.0099959858\C,-4.4863539473,-2.1416639348,-1.383124052  
8\C,-4.7893465979,-2.9252880031,-0.2577538716\H,-4.7902796044,-2.96976  
68867,1.8964995762\H,-4.6791141193,-2.5455887757,-2.3834651153\C,-3.66  
27849904,-0.0506819102,-2.5421122643\H,-3.106120216,0.8570730706,-2.25  
41948573\C,-3.8077186827,-0.5455618396,2.6026291429\C,-5.3613076212,-4  
.331428063,-0.4020305301\H,-5.5187410598,-4.7234941969,0.6209526607\C,  
-5.1562097363,-0.0405147854,3.1649099114\H,-5.0167238635,0.4160358138,  
4.1614457083\H,-5.6173974909,0.7111410073,2.5019360503\H,-5.8718818731  
,-0.8766571042,3.2671858736\C,-4.3675610227,-5.2721705859,-1.115781635  
4\H,-4.1767036435,-4.9368323048,-2.1512959492\H,-3.3984575255,-5.30144  
15728,-0.5878295453\H,-4.7680285092,-6.3009023988,-1.1621717725\C,-6.7  
308743774,-4.318992332,-1.112566216\H,-7.1567305704,-5.3376271452,-1.1  
550431529\H,-7.4462529765,-3.6650542533,-0.5844101335\H,-6.6374650019,  
-3.9501980015,-2.1501614311\C,-2.7946209552,-0.8219211141,-3.556443602  
8\H,-3.3276341773,-1.7017776179,-3.9609911809\H,-2.5395705218,-0.16956  
79445,-4.4106465898\H,-1.8568310122,-1.1658061739,-3.0908433545\C,-4.9  
938211372,0.4159759492,-3.1715498699\H,-4.803501103,1.038683259,-4.064  
3513619\H,-5.6095346331,-0.4474369939,-3.4836185738\H,-5.5849484797,1.  
0109501121,-2.4534092864\C,5.9416155121,-3.7525506796,1.3001590071\H,6  
.0685702401,-3.697094994,2.3983837564\C,3.7428123791,-0.9898710422,-2.  
3580427085\H,2.9501805543,-0.2248180269,-2.4313493783\C,3.4606969439,0  
.4887830683,2.5757545463\H,2.8763750695,1.291417495,2.0933341506\C,5.1  
853202483,-5.0601179964,0.9837975348\H,5.7524589908,-5.9376658065,1.34  
43106023\H,4.1906505847,-5.0673385427,1.462042485\C,7.3489902212,-3.75  
28526116,0.6681094598\H,7.290001726,-3.821820104,-0.4333965092\H,7.896  
8459909,-2.828024614,0.9193849705\H,7.9391496049,-4.6153865444,1.02761  
79514\C,2.5307772992,-0.2050331893,3.5928390463\H,1.6635940381,-0.6550  
623881,3.0824264178\H,3.0621517742,-1.0018198519,4.1447114495\H,2.1582  
972434,0.5253128236,4.3341484168\C,4.6618969517,1.1641068917,3.2706422



306\H,5.2972195408,1.6914497089,2.5375299539\H,4.3148830361,1.89830203  
89,4.0204095513\H,5.2929735277,0.4216071201,3.7921744722\C,4.977404550  
3,-0.4668429527,-3.1243135688\H,5.3490000758,0.4812130952,-2.698498933  
2\H,5.8035542941,-1.200123822,-3.0785572316\H,4.732316849,-0.293938790  
3,-4.1880545013\C,3.1900649597,-2.2719814554,-3.0126320234\H,3.9503180  
834,-3.0737868683,-3.0476440727\H,2.3087568802,-2.635929478,-2.4623407  
177\C,-3.1720558327,-1.5601593314,3.5745011022\H,-3.0051570884,-1.0803  
013669,4.5551717824\H,-3.1207119554,0.315051596,2.5425559615\H,-1.6539  
068144,-2.1776101966,0.850266392\H,5.0358281365,-5.1780549896,-0.10483  
33019\H,-3.8243277658,-2.4352892604,3.7468050137\H,-2.1971828179,-1.91  
51112654,3.2035783981\H,2.8892767024,-2.0598753739,-4.0546769325\Vers  
ion=ES64L-G09RevD.01\State=1-A\HF=-2580.924856\RMSD=9.306e-09\RMSF=3.4  
02e-06\Dipole=-0.949212,0.7494165,0.4083168\Quadrupole=2.0423758,5.641  
0492,-7.683425,4.7244275,-2.7738086,-2.6663384\PG=C01 [X(C50H57O4P1)]\  
\@

### TRIP-

1\1\GINC-WORKER0\FOpt\RTSPSS\def2SVP\C50H56O4P1(1-)\JHIOE\04-Dec-20  
17\0\#p tpsstps/def2svp freq opt empiricaldispersion=gd3 int=ultrafi  
ne\title\1,1\p,0.0218001575,-1.2272327907,0.1637739337\O,-1.0075430  
065,-0.1380062442,-0.693482303\O,1.025615262,0.0141139203,0.8209805032  
\O,0.7469300046,-1.9713255591,-0.9175705775\O,-0.6893096051,-1.7895873  
645,1.3584436567\C,-0.7239181912,2.0860002986,0.1339348378\C,-1.521350  
4304,0.9475572674,-0.0617839768\C,-2.90468596,0.908467782,0.3141205482  
\C,-3.4664325003,2.0396005649,0.8867353561\H,-4.5306967423,2.038098551  
9,1.1476053023\C,-2.687770236,3.1952615438,1.1816085341\C,-1.288092664  
1,3.2133534942,0.8302422354\C,-0.5144309889,4.3470912829,1.2254778527\  
H,0.5574691971,4.3541150151,1.0085389234\C,-1.0935995034,5.4218914941,  
1.8827225847\H,-0.4724342649,6.2754397689,2.1779314989\C,-2.4811033798  
,5.4210216573,2.1847249292\H,-2.9311091301,6.2775731265,2.6998296094\C  
, -3.25537521,4.3232030127,1.8444047745\H,-4.3229358712,4.2965155672,2.  
0947585195\C,0.6818854723,2.065642583,-0.3552787452\C,1.5095249826,0.9  
954448974,0.0186987206\C,2.893224554,0.9320029272,-0.3526880074\C,3.42  
51352891,1.9707233905,-1.1017123017\H,4.4888708188,1.9546218639,-1.364  
410282\C,2.6162761498,3.0435050749,-1.5747380338\C,1.2163209507,3.0809  
093201,-1.2257730175\C,0.4130457825,4.1156150281,-1.7952771691\H,-0.65  
87753156,4.1292463317,-1.5782682724\C,0.9638342631,5.0856652783,-2.618  
8249631\H,0.3203639824,5.8639868919,-3.0450873474\C,2.3510476458,5.072  
823145,-2.9218394354\H,2.7784400449,5.8469555643,-3.5695837689\C,3.154  
0475137,4.0648192778,-2.4122783027\H,4.2220856666,4.0263550087,-2.6590  
576696\C,3.716776043,-0.2443063837,0.0704784662\C,4.147355431,-1.19181  
87846,-0.8976346964\C,4.0569304157,-0.4223500721,1.4359939061\C,4.9556  
472341,-2.2633145178,-0.4831404402\C,4.8597139474,-1.5177676856,1.8002  
617244\C,5.3277911534,-2.4450818055,0.858471727\H,5.284397965,-2.99173  
69215,-1.2339560669\H,5.1249971873,-1.6584754337,2.8561293641\C,-3.698  
5137028,-0.3393577429,0.081607413\C,-4.113058224,-1.1311203986,1.18462  
16321\C,-4.0294480282,-0.7371880015,-1.2411105523\C,-4.8999697183,-2.2  
712386841,0.9398418934\C,-4.8078775319,-1.8902103672,-1.4318902668\C,-  
5.2630772391,-2.6678886677,-0.3546569141\H,-5.2246858959,-2.8857942134  
,1.788660885\H,-5.0590854524,-2.1919750489,-2.4564432683\C,-3.56547208  
62,0.0534481061,-2.4645758354\H,-2.9694661523,0.9090444249,-2.10610590  
66\C,-3.7148084321,-0.7925469759,2.622339069\C,-6.0969693463,-3.925296  
4124,-0.5821469638\H,-6.3427489795,-4.3355509472,0.4166034602\C,-4.906  
1319829,-0.1955565187,3.4019152605\H,-4.6011699493,0.0813647032,4.4284  
145133\H,-5.3050329301,0.7077920002,2.907694427\H,-5.7320894448,-0.928  
0146602,3.4784295447\C,-5.2957673914,-5.0027342423,-1.3430010762\H,-5.  
0266707975,-4.6518642276,-2.3560006427\H,-4.3579776217,-5.2419646545,-  
0.8130940556\H,-5.8860180549,-5.9323344686,-1.4513594133\C,-7.42828428  
44,-3.6118550639,-1.2959763721\H,-8.0436048595,-4.5248578976,-1.404913  
2303\H,-8.012488165,-2.8634236549,-0.7321571222\H,-7.2488118387,-3.204

601212,-2.3078818522\C,-2.6468409311,-0.7937268704,-3.3700409738\H,-3.  
1911534329,-1.6573455066,-3.796914379\H,-2.2719695909,-0.1829728359,-4  
.2125369347\H,-1.7817307024,-1.1654984887,-2.7981040286\C,-4.763257693  
7,0.6334971252,-3.2459888398\H,-4.4121664457,1.2480484998,-4.095899992  
4\H,-5.4056724455,-0.1690357492,-3.6544352822\H,-5.3906330777,1.268985  
3537,-2.5955366187\C,6.1822494035,-3.6335862981,1.289308059\H,6.355223  
6932,-3.5304807314,2.3783353855\C,3.7413425004,-1.0897325261,-2.369185  
034\H,2.9350585725,-0.3405589185,-2.4344323123\C,3.5811184274,0.542982  
5121,2.5215342211\H,2.9632537808,1.3162396441,2.0355585478\C,5.4439733  
499,-4.9694274336,1.0598761432\H,6.0446840165,-5.8222353656,1.42897065  
41\H,4.4705320757,-4.9745386398,1.5793639217\C,7.5613677288,-3.6326310  
188,0.5980036177\H,7.4553016359,-3.7425368794,-0.4967654768\H,8.099337  
9264,-2.6875377999,0.7897625375\H,8.1866186535,-4.4699544354,0.9612827  
662\C,2.6874154387,-0.1670002852,3.5600348912\H,1.8269561426,-0.643573  
0859,3.0638413882\H,3.2531348605,-0.9391763125,4.1149054612\H,2.304424  
9494,0.5634307035,4.297042299\C,4.7694403244,1.2677470642,3.1882848816  
\H,5.3770179591,1.8052688554,2.4382883463\H,4.4088115293,2.0022414392,  
3.9324569028\H,5.4334850767,0.5556856043,3.7131575119\C,4.9224384264,-  
0.6050514055,-3.237075605\H,5.3080341523,0.3705501893,-2.8921505285\H,  
5.7594566849,-1.3280101264,-3.1999515952\H,4.6124902457,-0.4976727186,  
-4.2933692141\C,3.1574871871,-2.4118909395,-2.9066234933\H,3.915134728  
4,-3.2186280798,-2.925556999\H,2.3027348034,-2.7148859308,-2.281404142  
9\C,-3.1127264947,-2.0038937405,3.3624787631\H,-2.765844486,-1.6919806  
573,4.3654877364\H,-2.9197264747,-0.0305993547,2.5693828768\H,5.248164  
8479,-5.1315926045,-0.0156488533\H,-3.8572510869,-2.8100082159,3.50686  
41357\H,-2.2496201691,-2.3866833638,2.7951985426\H,2.8036239046,-2.268  
0082145,-3.9447690443\\Version=ES64L-G09RevD.01\State=1-A\HF=-2580.412  
4393\IRMSD=6.473e-09\IRMSF=2.279e-06\Dipole=-0.0178291,1.161431,-0.16794  
85\Quadrupole=-8.9092444,0.5295176,8.3797268,0.2919824,1.8458793,0.206  
2375\PG=C01 [X(C50H56O4P1)]\@

## TRIM-H

1\1\GINC-WORKER0\FOpt\RTSPSS\def2SVP\C38H33O4P1\JHIOE\21-Nov-2018\O  
\#p tpsstps/def2svp empiricaldispersion=gd3 int=ultrafine opt\title  
\0,1\P,-0.0320044856,-1.6965651987,-0.1766471405\O,-1.0283454794,-0.5  
876798788,-0.8822029054\O,0.9542160385,-0.7038488771,0.7022931652\O,0.  
5593978448,-2.6263819802,-1.160405824\O,-0.857815357,-2.4076926519,1.0  
100335403\C,-0.6595150826,1.525733718,0.2115002741\C,-1.5166205165,0.4  
731339776,-0.1166795393\C,-2.8920243025,0.4241466634,0.262070684\C,-3.  
3927167885,1.4910119145,0.9973391984\H,-4.449046908,1.4876536424,1.287  
7037103\C,-2.5658994306,2.5717394326,1.414316638\C,-1.1712307234,2.583  
9567337,1.0461280246\C,-0.3455799423,3.6281924803,1.5609253299\H,0.722  
2852593,3.6258379307,1.3270951868\C,-0.8764961123,4.6320024637,2.35506  
4349\H,-0.2218151976,5.4204422847,2.7413466497\C,-2.2592276779,4.64384  
97576,2.6782411497\H,-2.6673243651,5.447489462,3.3003377418\C,-3.08258  
97058,3.6291727699,2.2214781883\H,-4.1465787417,3.6152213518,2.4833909  
4\C,0.7543740711,1.4932668434,-0.254868418\C,1.5401313399,0.3751276011  
,0.0278008893\C,2.9242398748,0.2741326587,-0.2935579147\C,3.505011868,  
1.3516332656,-0.9493296048\H,4.5725919796,1.3124656629,-1.1922135239\C  
,2.7491061611,2.4928933359,-1.3413369867\C,1.347096506,2.5659248424,-1  
.0121410822\C,0.5969225278,3.6837805153,-1.4850061748\H,-0.4759933627,  
3.7302174494,-1.2787804474\C,1.2060422953,4.6974482556,-2.2074487469\H  
,0.6086653504,5.5429044903,-2.5651088407\C,2.5955501508,4.6451621883,-  
2.4951810266\H,3.0660795731,5.4556156322,-3.061929335\C,3.3469163518,3  
.5610029359,-2.0746300491\H,4.4153605449,3.4996394626,-2.3100761972\H,  
-1.2288810867,-1.76760372,1.6495682255\C,3.7069137576,-0.9422816949,0.  
0866973355\C,4.0640002014,-1.8972637845,-0.897652310\C,4.0882737373,-  
1.1265076022,1.4378702841\C,4.8135181062,-3.0191060375,-0.504679191\C,  
4.8388384029,-2.2627987032,1.7838171056\C,5.2113882021,-3.2227163018,0.  
.8278422207\H,5.0871827251,-3.7606529665,-1.2654613186\H,5.1413506367,

-2.3993660681,2.8296608996\C,-3.7318649457,-0.7601530279,-0.0930276529  
\C,-4.1503906302,-1.6560337006,0.9198983994\C,-4.1016239185,-0.9898844  
503,-1.4448601944\C,-4.9279854773,-2.7737877602,0.5639696448\C,-4.8864  
052146,-2.1108629211,-1.7513222744\C,-5.306793846,-3.0210025981,-0.763  
3976472\H,-5.239200955,-3.4737423164,1.3493409586\H,-5.1768033043,-2.2  
815043643,-2.7954580668\C,-3.6588715226,-0.0454085691,-2.5405496487\H,  
-2.5814334831,-0.1741179043,-2.7488807181\C,-3.7872758152,-1.449785304  
1,2.3780737649\C,-6.1202971356,-4.2409884003,-1.1361680677\H,-6.539574  
0375,-4.737034085,-0.2448928145\C,5.9897463689,-4.4592980765,1.2225207  
582\H,6.7409899454,-4.7240925279,0.4578265164\C,3.6063185038,-1.750000  
449,-2.3326529623\H,3.8665615312,-0.7626734393,-2.751608951\C,3.689049  
6399,-0.119178049,2.4947898597\H,2.5943177291,-0.1298509527,2.64909104  
81\H,-4.5772703714,-0.8912664086,2.9147379032\H,6.510296491,-4.3205308  
876,2.1853554886\H,5.3143781028,-5.3295119902,1.3312087997\H,4.1721754  
258,-0.3417207224,3.4606095725\H,3.962690823,0.9091391648,2.1975092434  
\H,4.0578868534,-2.527128254,-2.9710998791\H,2.5082611823,-1.857667756  
4,-2.3853591198\H,-5.4947532132,-4.9807862115,-1.6703467025\H,-6.95528  
12433,-3.975638676,-1.808970822\H,-4.2135290845,-0.2335240011,-3.47449  
21276\H,-3.8114718294,1.0091668425,-2.2501375815\H,-3.660011632,-2.417  
3647863,2.8924851289\H,-2.8638701774,-0.8553936741,2.5032029908\|Versi  
on=ES64L-G09RevD.01\|State=1-A\|HF=-2109.37708669\|RMSD=7.364e-09\|RMSF=7.2  
59e-07\|Dipole=-0.7592775,1.3277649,0.8293031\|Quadrupole=4.2021528,-1.3  
537121,-2.8484407,3.4328487,-3.6299053,-2.6785418\|PG=C01 [X(C38H33O4P1  
)]\|@

#### TRIM-

1\1\GINC-LOGIN\Fopt\RTPSSSTPSS\def2SVP\C38H32O4P1(1-)\JHIOE\03-Dec-2018  
\0\#p tpsstps/def2svp empiricdispersion=gd3 int=ultrafine opt\|tit  
le\|-1,1P,0.0060719655,-1.8448281664,-0.0031651835\O,1.0093958388,-0.  
6746133771,0.7921118168\O,-1.0017361549,-0.6763925753,-0.795324597\O,-  
0.7589197975,-2.5076046134,1.1035834612\O,0.7736229023,-2.5017165765,-  
1.1116501815\C,0.7040613182,1.4576321399,-0.2394775333\C,1.5191554319,  
0.357141304,0.0707661496\C,2.9052371225,0.316014878,-0.2922162194\C,3.  
4407521334,1.3864301785,-0.9939130105\H,4.5046022241,1.3735606603,-1.2  
599782012\C,2.642066253,2.4922506494,-1.4020223212\C,1.2455685423,2.52  
38228083,-1.0390492664\C,0.4517418593,3.6067944282,-1.5273196213\H,-0.  
6173734718,3.6203170439,-1.2968759166\C,1.0084534918,4.6225144931,-2.2  
891583294\H,0.3728197491,5.4379472067,-2.6535156797\C,2.3922582998,4.6  
097604822,-2.6091895438\H,2.8242477634,5.4197936508,-3.2083177517\C,3.  
185767342,3.5591589632,-2.1767860676\H,4.251263568,3.5242428324,-2.435  
2541511\C,-0.7044213148,1.4543682315,0.2416725543\C,-1.5153648396,0.35  
15952856,-0.0713375485\C,-2.9012655866,0.3043101252,0.2915593873\C,-3.  
440810424,1.3709248948,0.9959598314\H,-4.5045963017,1.3533533212,1.262  
0115861\C,-2.6463027002,2.4787243682,1.4068371811\C,-1.2499392727,2.51  
64850196,1.0439321537\C,-0.4602006871,3.6012176601,1.5349197133\H,0.60  
88514489,3.6193583578,1.3045009154\C,-1.0207312475,4.6129067187,2.2993  
151528\H,-0.3881773884,5.4298166852,2.6657176911\C,-2.4044737072,4.594  
1207349,2.6193242368\H,-2.8395080889,5.4010085073,3.2204903066\C,-3.19  
40160661,3.5416219054,2.1842862811\H,-4.259368673,3.5020320955,2.44267  
21177\C,-3.7449537069,-0.8635073604,-0.1111296455\C,-4.1460500796,-1.8  
216853309,0.8529313792\C,-4.1511810539,-0.9968685943,-1.4610360148\C,-  
4.9762177489,-2.8811713488,0.4464600521\C,-4.9809340742,-2.0719544544,  
-1.822970543\C,-5.4071435359,-3.0247713706,-0.8829255578\H,-5.28003601  
94,-3.6265215967,1.1931393744\H,-5.2969696541,-2.1683056808,-2.8701778  
843\C,3.7533036229,-0.8496207285,0.1075779544\C,4.1581140419,-1.803799  
5993,-0.8588595191\C,4.1598761889,-0.9849038346,1.4572086904\C,4.99224  
471,-2.8611940462,-0.4549888136\C,4.9936331368,-2.0577512641,1.8164925  
33\C,5.4235578966,-3.0065672273,0.8740572675\H,5.298961133,-3.60348079  
64,-1.2035300639\H,5.309905607,-2.155583272,2.8634915707\C,3.680405763  
1,-0.0022853553,2.5027004349\H,2.5908342919,-0.1153776272,2.6498415157

\C,3.6352064158,-1.7377002437,-2.2755700803\C,6.2848636372,-4.18199590  
98,1.2870492391\H,5.6610582015,-5.0678445203,1.5172527424\C,-6.2641593  
782,-4.2023913548,-1.2986419667\H,-6.9649232313,-4.4970785743,-0.49682  
47516\C,-3.6231906881,-1.7572261268,2.2697324021\H,-3.8012679276,-0.77  
18310951,2.7343368456\C,-3.6755674576,-0.0097818312,-2.5040796761\H,-2  
.5855537322,-0.1181908315,-2.6514567258\H,3.8097726933,-0.750511873,-2  
.7376919357\H,-6.8533990316,-3.9756266075,-2.2049351917\H,-5.637461079  
4,-5.087000083,-1.5256925817\H,-4.1792471738,-0.175818191,-3.471977734  
\H,-3.85732088,1.0331579581,-2.1871601967\H,-4.0920635478,-2.532804715  
3,2.8998619248\H,-2.5297105152,-1.9289823268,2.2392238476\H,6.87722652  
55,-3.9533677782,2.1908537798\H,6.9830473336,-4.4756285305,0.482630305  
4\H,4.1847776656,-0.1687128714,3.4701691274\H,3.85800251,1.0421460921,  
2.1883486504\H,4.1069826356,-2.5099956525,-2.9075626806\H,2.5423579732  
,-1.9135157672,-2.2456564868\Version=ES64L-G09RevD.01\State=1-A\HF=-2  
108.8646024\RMSD=5.989e-09\RMSF=1.364e-06\Dipole=-0.0039897,2.0298048,  
0.0029742\Quadrupole=-4.7540919,-5.4882819,10.2423738,0.0002425,1.7198  
967,-0.0193291\PG=C01 [X(C38H32O4P1)]\@

### TRIFP-H

1\1\GINC-LOGIN\Fopt\RTPSSTPSS\def2SVP\C36H17F12O4P1\JHIOE\05-Dec-2017\  
0\#p tpsstps/def2svp int=ultrafine opt empiricdispersion=gd3\title  
e\0,1\p,-0.2939482634,-0.2042060679,0.7359871271\O,0.7456782431,0.815  
610435,1.5081068475\O,-0.843971109,0.777800565,-0.4612767707\O,-1.2543  
354532,-0.8415495771,1.6646237545\O,0.6305256624,-1.1636330526,-0.1826  
699144\C,1.0930781345,2.7040624461,0.0626787415\C,1.6062240157,1.59076  
01289,0.7272218486\C,2.9704728093,1.1779779736,0.6361159296\C,3.823366  
1619,1.9486912071,-0.1459319737\H,4.882176494,1.6760081619,-0.21481113  
42\C,3.361208549,3.0802509583,-0.872776335\C,1.9707722352,3.4554968449  
,-0.7980178918\C,1.5160776561,4.5323438787,-1.6154389724\H,0.456117164  
4,4.7995137771,-1.6043906892\C,2.3961466932,5.2328461412,-2.4252607975  
\H,2.0233256034,6.0535440981,-3.0471048142\C,3.7740387136,4.8922825237  
,-2.462136415\H,4.4590714963,5.4590171645,-3.1012657548\C,4.2429960544  
,3.8327404142,-1.7049272996\H,5.2997697929,3.5459872707,-1.7433104355\  
C,-0.3541478138,3.0295369966,0.2118275771\C,-1.2987017679,2.0433260764  
,-0.0713480291\C,-2.7089831619,2.2447831483,0.032152587\C,-3.144316658  
2,3.5048153597,0.4293789726\H,-4.219437039,3.7052726191,0.4914261367\C  
,-2.2367638561,4.5452750986,0.7696600704\C,-0.817046942,4.3072113249,0  
.6887728864\C,0.0688009605,5.3364061911,1.1248330811\H,1.1465784474,5.  
1534044417,1.1109377568\C,-0.4198819715,6.5537935889,1.5721542319\H,0.  
2786169473,7.3281452252,1.9063820561\C,-1.8171807089,6.803678754,1.608  
5148609\H,-2.188846574,7.7725136048,1.9580646538\C,-2.7054373054,5.815  
5890505,1.2203677761\H,-3.7861989998,5.989542308,1.2660930969\H,0.6416  
615428,-2.0651693528,0.1940159107\C,-3.6726185741,1.1440646922,-0.2341  
39178\C,-4.7602103217,0.9430655929,0.6403516787\C,-3.5384197266,0.2906  
851932,-1.3468418262\C,-5.6894850596,-0.0771334034,0.4032113546\C,-4.4  
736220874,-0.728050981,-1.5775167427\C,-5.5543035453,-0.921251231,-0.7  
082468684\C,3.4444442668,-0.0598979136,1.3091605334\C,4.2508324045,-0.  
9719856179,0.6004048852\C,3.1132182278,-0.3530030248,2.6487416169\C,4.  
7198991814,-2.1412498271,1.2161174294\C,3.5856133305,-1.5236653948,3.2  
562904325\C,4.3936748125,-2.425413659,2.5485306063\H,4.5026421738,-0.7  
75378152,-0.4457584438\H,-2.7020088313,0.4190237578,-2.0373983708\H,2.  
49437307,0.3391342393,3.2235092468\H,4.7701287701,-3.3305000589,3.0313  
679631\H,-4.8718506852,1.5757206356,1.5252629371\H,-6.2782573999,-1.71  
85423292,-0.892381312\C,3.1804506918,-1.84153239,4.6790152782\C,5.5315  
821353,-3.1289773057,0.4091424697\C,-6.813811001,-0.315356174,1.385692  
7813\C,-4.3194594909,-1.5905018059,-2.8096281061\F,6.3338710805,-2.504  
0506787,-0.4869926958\F,4.7278642904,-3.9652365713,-0.2977633692\F,6.3  
164013768,-3.9017718616,1.1954198703\F,4.1155723512,-2.5919476575,5.31  
05114337\F,2.0191872668,-2.5416459909,4.7135339341\F,2.990942002,-0.71  
88438615,5.4111564443\F,-5.0673001846,-2.716706324,-2.7414134267\F,-3.

029306848,-1.9652052045,-2.9941853144\F,-4.6978673268,-0.9247780018,-3  
.9309023577\F,-6.4754005082,-1.239844492,2.3172279113\F,-7.9302763355,  
-0.7694621368,0.7649213949\F,-7.1481013093,0.8171965414,2.0520326737\  
Version=ES64L-G09RevD.01\State=1-A\HF=-3220.8570472\RMSD=2.697e-09\RMS  
F=1.692e-06\Dipole=1.1203534,2.4138535,-0.7380208\Quadrupole=-4.693947  
5,16.4961131,-11.8021656,-0.1551561,-4.0033653,-1.5048221\PG=C01 [X(C3  
6H17F12O4P1)]\@

#### TRIFP-

1\1\GINC-LOGIN\FOpt\RTPSSTPSS\def2SVP\C36H16F12O4P1(1-)\JHIOE\04-Dec-2  
017\0\#p tpsstps/def2svp opt empiricaldispersion=gd3 int=ultrafine\  
title\1,1\p,0.0007143026,-0.8390396209,-0.036860218\O,-0.8930880411,  
0.4065011209,-0.8806156248\O,0.9124814855,0.3213239234,0.9029720893\O,  
0.9222172083,-1.4353877528,-1.055759836\O,-0.930589831,-1.5012276882,0  
.9310913129\C,-0.6917298116,2.4652998507,0.2970676427\C,-1.4653165494,  
1.3665552399,-0.1118184173\C,-2.8388925319,1.2233528624,0.2847395839\C  
,-3.4178901687,2.233345193,1.0451956187\H,-4.4754880037,2.1611840598,1  
.325469462\C,-2.6764495808,3.3643091761,1.484712895\C,-1.2799556957,3.  
4714642914,1.1363215082\C,-0.5348500432,4.5604624028,1.6833623649\H,0.  
5357246058,4.6260248817,1.4695599571\C,-1.1421712216,5.5193047079,2.47  
92685729\H,-0.5450603634,6.3431271255,2.8867925318\C,-2.528465934,5.43  
83313288,2.778878673\H,-2.9995547723,6.2047460761,3.4047566885\C,-3.27  
36527106,4.3757702275,2.2945358488\H,-4.3388949776,4.2864307343,2.5396  
60906\C,0.7423382426,2.4711123767,-0.1043810347\C,1.4992637764,1.33141  
28874,0.2133053934\C,2.8702591415,1.1998306953,-0.1959410052\C,3.46452  
99456,2.2593873483,-0.8724731585\H,4.5207168061,2.1938532814,-1.159644  
6064\C,2.7404962126,3.433660034,-1.2172553799\C,1.3457394844,3.5332302  
012,-0.8597326113\C,0.6172506995,4.6741833489,-1.315672624\H,-0.452252  
0984,4.7382874651,-1.096146789\C,1.2391164408,5.68529867,-2.0316503807  
\H,0.6545871459,6.5484280727,-2.3702282392\C,2.6240736288,5.6080571427  
,-2.338322838\H,3.1068024829,6.4156335808,-2.9003143529\C,3.3530366982  
,4.4985066464,-1.9427933064\H,4.4168342167,4.4133349145,-2.195506113\  
C,3.6207203942,-0.0548028215,0.0625643704\C,4.4579754155,-0.5863994135  
,-0.9372342055\C,3.5323314612,-0.7382741421,1.2938227561\C,5.199309074  
1,-1.7542574819,-0.7103048726\C,4.2805768408,-1.9011187274,1.515035813  
6\C,5.1177136566,-2.4222994059,0.5179924277\C,-3.6083079254,0.00630778  
22,-0.0770263003\C,-4.4605754423,-0.589592051,0.8717767622\C,-3.529019  
0192,-0.5725340603,-1.3620807396\C,-5.2302621931,-1.7146855736,0.54295  
19136\C,-4.3014202034,-1.6949222116,-1.683419351\C,-5.1596458102,-2.27  
59512427,-0.7377553265\H,-4.5101213881,-0.1814966414,1.8848862245\H,2.  
8683905778,-0.3635606322,2.0743552318\H,-2.8628331141,-0.1401790813,-2  
.1098526142\H,-5.7692195775,-3.1447144765,-0.9983961229\H,4.5118956103  
,-0.0965575092,-1.9131481916\H,5.691287174,-3.3355513307,0.6944288012\  
C,-4.2002802449,-2.3198668222,-3.0532705322\C,-6.102629741,-2.35469514  
24,1.5926604371\C,6.043282034,-2.3327177396,-1.8172992877\C,4.24319313  
62,-2.5736429404,2.8648504186\F,-6.5976724142,-1.4410204621,2.46981892  
11\F,-5.4332704093,-3.2762414444,2.3301035349\F,-7.16941043,-2.9982943  
007,1.0442794649\F,-5.4192430476,-2.7438269479,-3.4980495751\F,-3.3933  
433723,-3.4092440385,-3.0603831686\F,-3.7171605441,-1.4590993325,-3.98  
07308189\F,4.3897731662,-3.9214452707,2.7660405667\F,3.0953798018,-2.3  
354895653,3.5345860973\F,5.2618383286,-2.1390553511,3.6653243344\F,5.3  
530019044,-3.2070026641,-2.5919713447\F,7.1190602319,-3.0122829941,-1.  
3325930907\F,6.5230768802,-1.3703627687,-2.6490945501\Version=ES64L-G  
09RevD.01\State=1-A\HF=-3220.3531157\RMSD=7.595e-09\RMSF=9.483e-07\Dip  
ole=-0.0181163,2.4026797,0.0777577\Quadrupole=-13.1506618,5.3126297,7.  
8380321,0.041512,0.2135674,-0.3475624\PG=C01 [X(C36H16F12O4P1)]\@

#### TIPSY-H

1\1\GINC-WORKER0\FOpt\RTPSSTPSS\def2SVP/W06\C56H41O4P1Si2\JHIOE\30-Nov  
-2017\0\#p tpsstps/def2svp/w06 densityfit opt empiricaldispersion=gd

3 scrf=(solvent=ch2cl2,smd,read)\title\0,1P,0.067568354,-1.05433648  
26,0.8425727779\O,-1.0382069612,-0.3042647807,-0.1266043918\O,1.136848  
5961,0.1440790852,1.1287255563\O,0.5245239453,-2.3221111586,0.21511594  
38\O,-0.5223764291,-1.1206354387,2.3367209317\C,-0.6934706609,2.064933  
9147,0.2152180408\C,-1.5412809901,0.9569886147,0.2334518104\C,-2.93873  
1799,1.021892152,0.5095882316\C,-3.443927379,2.2469111534,0.9329155578  
\H,-4.5117572886,2.3558976188,1.1541554745\C,-2.6039604242,3.386747261  
,1.1076759094\C,-1.2117408596,3.3061920381,0.7405119745\C,-0.388749806  
6,4.4531010833,0.9475677628\H,0.6762151246,4.3990182806,0.7044327554\C  
, -0.9175600099,5.6242817606,1.4703270188\H,-0.2644341488,6.4889884824,  
1.6308808752\C,-2.2948681327,5.7111225368,1.8062098929\H,-2.6989952181  
,6.6445962803,2.2123480235\C,-3.1186977266,4.6108092328,1.6306161613\H  
, -4.1801471855,4.6590985764,1.8983544073\C,0.6780210982,1.9600088177,-  
0.3587835485\C,1.5704613358,0.9933786816,0.1040863106\C,2.9178169311,0  
.8563213268,-0.3396081494\C,3.3472101393,1.7557498431,-1.3122429246\H,  
4.3800129873,1.7165830709,-1.677469131\C,2.4755021086,2.720758748,-1.8  
945759465\C,1.1095014129,2.8124844737,-1.4410792711\C,0.2370493779,3.7  
231165115,-2.1098883231\H,-0.8134696923,3.7773710123,-1.8122521615\C,0  
.6996656457,4.527199738,-3.1411030895\H,0.0086361324,5.2123609045,-3.6  
440961912\C,2.0568134256,4.4665982907,-3.5566350704\H,2.4086784179,5.1  
133434893,-4.3675245683\C,2.9237732838,3.5749632989,-2.9469513208\H,3.  
9675903982,3.4984964102,-3.2717308577\H,-0.8991395001,-2.0095071893,2.  
5331794839\Si,-4.0257282549,-0.5014776135,0.167193196\C,-3.4725642603,  
-1.9148588829,1.2969565522\C,-3.6067517627,-1.7963890747,2.7013393509\  
C,-2.7980415434,-3.0460711291,0.7848054624\C,-3.0791205188,-2.76988676  
65,3.5635794572\H,-4.1024390915,-0.919063583,3.1337620854\C,-2.2564854  
804,-4.0172093307,1.6429919306\H,-2.6566405541,-3.1540233565,-0.296051  
2666\C,-2.3929764392,-3.8788531696,3.0349258159\H,-3.1819434007,-2.654  
9435334,4.6481414876\H,-1.7115483728,-4.8707515898,1.2261294074\H,-1.9  
620478342,-4.6291405609,3.7067157584\C,-5.8407859756,-0.0460975327,0.4  
669714947\C,-6.6666143882,-0.7108106547,1.4013443812\C,-6.4250470507,0  
.9730306693,-0.3256300471\C,-8.0194469744,-0.3626054848,1.5505969951\H  
, -6.2567012422,-1.5182610084,2.0186216938\C,-7.7736953472,1.3273173173  
, -0.1761686623\H,-5.8186508029,1.4956211533,-1.0763443602\C,-8.5742715  
91,0.6595639786,0.7656182527\H,-8.6411150329,-0.8934767302,2.280582242  
8\H,-8.2029419884,2.120856264,-0.7984252278\H,-9.6291383657,0.93271889  
22,0.8822003723\C,-3.8598214758,-0.9909544478,-1.6554848325\C,-4.59015  
69909,-2.1069621287,-2.1307619367\C,-3.0708019064,-0.2724181683,-2.581  
564505\C,-4.5210193197,-2.5004909956,-3.4756205445\H,-5.2241187623,-2.  
679397241,-1.4413877416\C,-3.0019391009,-0.6602392927,-3.9292191913\H,  
-2.5003696464,0.6044383538,-2.2542293576\C,-3.723998445,-1.7770365072,  
-4.3780899387\H,-5.0909097257,-3.3706987116,-3.8207460091\H,-2.3818831  
832,-0.0887823172,-4.6293455214\H,-3.6686537166,-2.0820164214,-5.42922  
86061\Si,4.0697746981,-0.556641112,0.2235418342\C,3.6586158497,-1.1120  
435385,1.9842478262\C,3.3159495473,-2.4535137312,2.2640353955\C,3.6110  
438117,-0.179520667,3.0482089879\C,2.9430507912,-2.8516886584,3.558239  
0128\H,3.3185671243,-3.1961620022,1.4586483131\C,3.2463491061,-0.57426  
10801,4.3431236155\H,3.8364254635,0.87756587,2.8614802128\C,2.90938476  
89,-1.9136897197,4.6010181991\H,2.6725081338,-3.896424375,3.7501904631  
\H,3.2126873909,0.1659529459,5.1507213808\H,2.6154840063,-2.2224590492  
,5.610684081\C,5.8624875563,0.0593387971,0.0928902633\C,6.5816453071,0  
.5662840197,1.2000471864\C,6.5158394286,0.0384513282,-1.1638313297\C,7  
.8939981193,1.0441737731,1.0571268627\H,6.1196261506,0.583976761,2.193  
5586146\C,7.8265821977,0.5177573669,-1.3119544283\H,5.9952955325,-0.36  
44265395,-2.0411950591\C,8.5187490887,1.023389081,-0.1999965249\H,8.43  
20701928,1.4293364875,1.9308529979\H,8.3103839708,0.4909651288,-2.2950  
382244\H,9.5437438283,1.3946115105,-0.311763191\C,3.8730185986,-1.9841  
623873,-1.0036583984\C,4.7993516864,-3.0547197671,-0.9823036619\C,2.83  
07507429,-2.0270048646,-1.9559502961\C,4.6843074841,-4.1323035662,-1.8  
732190997\H,5.626595194,-3.0472408894,-0.2614465216\C,2.7144154239,-3.

1008129401,-2.8528539267\H,2.0935645383,-1.2175440203,-1.9949370116\C,  
3.6396509592,-4.1557758648,-2.8121971217\H,5.4114505564,-4.951555407,-  
1.8378626917\H,1.8973763254,-3.1152733038,-3.5831810715\H,3.5483245686  
, -4.9947033705,-3.5114936116\Version=ES64L-G09RevD.01\State=1-A\HF=-3  
378.7524661\RMSD=6.562e-09\RMSF=2.653e-06\Dipole=-0.9837422,1.1776604,  
0.2355469\Quadrupole=2.3331007,0.3844474,-2.7175481,3.191743,-10.27362  
33,-6.8238773\PG=C01 [X(C56H41O4P1Si2)]\@

#### TIPSY-

1\1\GINC-WORKER1\FOpt\RTPSSSTPSS\def2SVP/W06\C56H40O4P1Si2(1-)\JHIOE\30  
-Nov-2017\0\#p tpsstps/def2svp/w06 densityfit opt empiricaldispersio  
n=gd3 scrf=(solvent=ch2cl2,smd,read)\title\1,1\IP,-0.003174279,-1.52  
21620798,-0.5975977299\O,-1.2692034485,-0.3971039037,-0.8857575001\O,1  
.0726738423,-0.5116542942,0.2682543933\O,0.5394544664,-1.793500342,-1.  
9802510462\O,-0.4394761341,-2.558364882,0.3941965832\C,-0.6101892167,1  
.73330921,0.0217244856\C,-1.5605753985,0.7185046786,-0.1528657233\C,-2  
.9135359834,0.8390988222,0.3063546825\C,-3.2519602117,1.9647323485,1.0  
499407792\H,-4.2773155858,2.0962223535,1.413527934\C,-2.2942564821,2.9  
675689678,1.3806756568\C,-0.9502112577,2.850169657,0.872569517\C,0.000  
4417752,3.8420656953,1.2652327579\H,1.0375574889,3.7504329866,0.930163  
4142\C,-0.365057032,4.9054208834,2.0784950984\H,0.3877490121,5.6460637  
036,2.3709185931\C,-1.7006190147,5.0386112983,2.5436238837\H,-1.976906  
4719,5.8874249892,3.1786297162\C,-2.6425207377,4.0803555478,2.20355837  
4\H,-3.6732001319,4.1560160724,2.5693945128\C,0.7291669741,1.671113344  
9,-0.6298736293\C,1.5786187325,0.5878523099,-0.3798253776\C,2.97937910  
69,0.6170530566,-0.6794091238\C,3.4539826349,1.6967015584,-1.420093515  
6\H,4.521862903,1.7774575248,-1.6550683032\C,2.5911503825,2.7303298955  
, -1.8899654141\C,1.2094214317,2.734642576,-1.4764699907\C,0.3677498977  
,3.786730144,-1.9501067037\H,-0.689881074,3.7901059197,-1.6694607078\C  
,0.8661746947,4.7850618959,-2.7747536214\H,0.1971368734,5.5744063675,-  
3.1354025401\C,2.2335563517,4.7911492362,-3.1616614191\H,2.6146722175,  
5.5893561923,-3.8080122103\C,3.0759318037,3.779987161,-2.7264372691\H,  
4.1311857114,3.7655398063,-3.0228874839\Si,-4.2096270962,-0.4910244339  
, -0.1061058849\C,-3.7828995148,-2.1317456359,0.7293875461\C,-3.2343767  
645,-2.1416118227,2.0318593254\C,-4.0723157574,-3.3727017227,0.1202300  
927\C,-2.9956387798,-3.3460988583,2.7089599521\H,-2.9833333311,-1.1937  
800807,2.52414572\C,-3.826101999,-4.5820174105,0.790068749\H,-4.490472  
2427,-3.3986753559,-0.8935387527\C,-3.2903794069,-4.5704209598,2.08771  
5527\H,-2.5669944782,-3.3311940366,3.717704167\H,-4.0510372476,-5.5349  
6173,0.2970136955\H,-3.0975614492,-5.5135259485,2.6120329528\C,-5.8507  
004825,0.1399744157,0.6288674562\C,-6.4274245021,-0.4163112617,1.79226  
41088\C,-6.5145547721,1.2346353951,0.0227052729\C,-7.6160209957,0.1015  
247473,2.3344195193\H,-5.9425996515,-1.2674911481,2.2855337442\C,-7.69  
96292291,1.7578782877,0.5604460483\H,-6.0977106838,1.6878294322,-0.885  
6671809\C,-8.2531213641,1.1910800706,1.7209167289\H,-8.0451897221,-0.3  
47585352,3.2376101339\H,-8.1928250232,2.6077288266,0.0746225751\H,-9.1  
794780795,1.5969683631,2.1433129599\C,-4.5222264113,-0.7390272533,-1.9  
658931317\C,-5.8124404196,-1.1660367976,-2.3689243784\C,-3.54772719,-0  
.5556012342,-2.9756333815\C,-6.1182142318,-1.4011533974,-3.7184794862\  
H,-6.5966105742,-1.3150366688,-1.6166133286\C,-3.8535365504,-0.7809681  
494,-4.3274136995\H,-2.5318595307,-0.2563695929,-2.7013876411\C,-5.137  
8083217,-1.2048987296,-4.7037427321\H,-7.1240191202,-1.7335256718,-4.0  
004110271\H,-3.080779726,-0.6293334731,-5.0899512756\H,-5.3738918677,-  
1.382198527,-5.7593086571\Si,4.1873656175,-0.5900490539,0.1634573941\C  
,3.620445543,-0.833550379,1.9571997225\C,3.7928400433,-2.0639352822,2.  
6289617753\C,3.026874419,0.2341459837,2.6721827285\C,3.3897499615,-2.2  
240251472,3.9650236135\H,4.2384033229,-2.9157325576,2.1009297991\C,2.6  
239381769,0.0800422527,4.0066481738\H,2.8614498881,1.1986057714,2.1761  
260598\C,2.8052737452,-1.1519539726,4.6570977484\H,3.5271568072,-3.190  
0756792,4.4644725168\H,2.1600847884,0.9196064782,4.5372242531\H,2.4862

963566,-1.276936165,5.698228706\C,5.8786109879,0.2865024759,0.18325638  
14\C,6.2914626403,1.0704874201,1.2848826284\C,6.7436373751,0.215134720  
3,-0.935501113\C,7.5155195086,1.758213845,1.2718564639\H,5.6505237,1.1  
440762104,2.1717492278\C,7.9676244951,0.9021562003,-0.9550090506\H,6.4  
588021551,-0.3889709514,-1.8058466485\C,8.3559809313,1.676924781,0.150  
1914598\H,7.814190637,2.3572701293,2.1398496391\H,8.6201192656,0.83143  
46893,-1.8329227013\H,9.3123981241,2.2119668917,0.1382479995\C,4.43879  
29084,-2.2543180108,-0.7015521337\C,5.6064006924,-3.0055677901,-0.4170  
675045\C,3.5015093554,-2.7973110257,-1.6091468916\C,5.8294556966,-4.25  
52339513,-1.015400137\H,6.3572992533,-2.6071128188,0.2766167286\C,3.72  
65107981,-4.0470758789,-2.2105463647\H,2.5732126079,-2.2592801753,-1.8  
417133923\C,4.887805479,-4.7785120563,-1.9171020629\H,6.7396262497,-4.  
8195043098,-0.7810750166\H,2.9839606734,-4.4505884704,-2.9091223732\H,  
5.0609044715,-5.752731161,-2.3890364197\\Version=ES64L-G09RevD.01\Stat  
e=1-A\HF=-3378.2804122\RMSD=3.406e-09\RMSF=4.776e-06\Dipole=-0.0220105  
,3.3000749,1.2562167\Quadrupole=2.7875976,-4.1107931,1.3231956,-0.4344  
087,-3.0752021,-1.6818227\PG=C01 [X(C56H40O4P1Si2)]\@



## 18 References

- (1) Klussmann, M.; Ratjen, L.; Hoffmann, S.; Wakchaure, V.; Goddard, R.; List, B. Synthesis of TRIP and Analysis of Phosphate Salt Impurities. *Synlett* **2010**, *2010* (14), 2189–2192. <https://doi.org/10.1055/s-0030-1258505>.
- (2) Sorgenfrei, N.; Hioe, J.; Greindl, J.; Rothermel, K.; Morana, F.; Lokesh, N.; Gschwind, R. M. NMR Spectroscopic Characterization of Charge Assisted Strong Hydrogen Bonds in Brønsted Acid Catalysis. *J. Am. Chem. Soc.* **2016**, *138* (50), 16345–16354. <https://doi.org/10.1021/jacs.6b09243>.
- (3) Greindl, J.; Hioe, J.; Sorgenfrei, N.; Morana, F. D.; Gschwind, R. M. Brønsted Acid Catalysis – Structural Preferences and Mobility in Imine/Phosphoric Acid Complexes. *J. Am. Chem. Soc.* **2016**, *49* (138), 15965–15971. <https://doi.org/10.1021/jacs.6b09244>.
- (4) Aznar, F.; Valde, C. Modular Synthesis of Indoles from Imines and *o*-Dihaloarenes or *o*-Chlorosulfonates by a Pd-Catalyzed Cascade Process. *J. Am. Chem. Soc.* **2009**, *131* (8), 4031–4041.
- (5) Schramm, Y.; Barrios-Landeros, F.; Pfaltz, A. Discovery of an Iridacycle Catalyst with Improved Reactivity and Enantioselectivity in the Hydrogenation of Dialkyl Ketimines. *Chem. Sci.* **2013**, *4*, 2760–2766. <https://doi.org/10.1039/c3sc50587a>.
- (6) Westheimer, F. H.; Taguchi, K. Vot. 36, No. 11, 1971. *J. Org. Chem.* **1971**, *36* (11), 1570–1572.
- (7) Hansen, M. C.; Buchwald, S. L. A Method for the Asymmetric Hydrosilylation of *N*-Aryl Imines. *Org. Lett.* **2000**, *2* (5), 713–715. <https://doi.org/10.1021/ol005583w>.
- (8) Samec, J. S. M.; Bäckvall, J. E. Ruthenium-Catalyzed Transfer Hydrogenation of Imines by Propan-2-OL in Benzene. *Chem. Eur. J.* **2002**, *8* (13), 2955–2961. [https://doi.org/10.1002/1521-3765\(20020703\)8:13<2955::AID-CHEM2955>3.0.CO;2-Q](https://doi.org/10.1002/1521-3765(20020703)8:13<2955::AID-CHEM2955>3.0.CO;2-Q).
- (9) Wang, Z.; Ye, X.; Wei, S.; Wu, P.; Zhang, A.; Sun, J. A Highly Enantioselective Lewis Basic Organocatalyst for Reduction of *N*-Aryl Imines with Unprecedented Substrate Spectrum. *Org. Lett.* **2006**, *8* (5), 999–1001. <https://doi.org/10.1021/ol060112g>.
- (10) Harris, R. K.; Becker, E. D.; Cabral de Menezes, S. M.; Goodfellow, R.; Granger, P. NMR Nomenclature: Nuclear Spin Properties and Conventions for Chemical Shifts. IUPAC Recommendations 2001. International Union of Pure and Applied Chemistry. Physical Chemistry Division. Commission on Molecular Structure and Spectroscopy. *Magn. Reson. Chem.* **2002**, *40* (7), 489–505. <https://doi.org/10.1002/mrc.1042>.
- (11) Limbach, H.-H.; Pietrzak, M.; Sharif, S.; Tolstoy, P. M.; Shenderovich, I. G.; Smirnov, S. N.; Golubev, N. S.; Denisov, G. S. NMR Parameters and Geometries of OHN and ODN Hydrogen Bonds of Pyridine–Acid Complexes. *Chem. – A Eur. J.* **2004**, *10* (20), 5195–5204. <https://doi.org/10.1002/chem.200400212>.
- (12) Sharif, S.; Denisov, G. S.; Toney, M. D.; Limbach, H. H. NMR Studies of Coupled Low- and High-Barrier Hydrogen Bonds in Pyridoxal-5'-Phosphate Model Systems in Polar Solution. *J. Am. Chem. Soc.* **2007**, *129* (19), 6313–6327. <https://doi.org/10.1021/ja070296+>.
- (13) Sharif, S.; Schagen, D.; Toney, M. D.; Limbach, H.-H. Coupling of Functional Hydrogen Bonds in Pyridoxal-5'-Phosphate-Enzyme Model Systems Observed by Solid-State NMR Spectroscopy. *J. Am. Chem. Soc.* **2007**, *129* (14), 4440–4455. <https://doi.org/10.1021/ja066240h>.
- (14) Limbach, H.-H.; Pietrzak, M.; Benedict, H.; Tolstoy, P. M.; Golubev, N. S.; Denisov, G. S. Empirical Corrections for Anharmonic Zero-Point Vibrations of Hydrogen and Deuterium in Geometric Hydrogen Bond Correlations. *J. Mol. Struct.* **2004**, *706* (1–3), 115–119. <https://doi.org/10.1016/j.molstruc.2004.03.006>.
- (15) Benedict, H.; Shenderovich, I. G.; Malkina, O. L.; Malkin, V. G.; Denisov, G. S.; Golubev, N. S.; Limbach, H. H. Nuclear Scalar Spin-Spin Couplings and Geometries of Hydrogen Bonds. *J. Am. Chem. Soc.* **2000**, *122* (9), 1979–1988. <https://doi.org/10.1021/ja9907461>.
- (16) Imides, S. S.; Tefddols, P. T.; Christ, P.; Lindsay, A. G.; Vormittag, S. S.; Neudçrfl, J.; Berkessel, A.; Donoghue, A. C. O. P K a Values of Chiral Brønsted Acid Catalysts :

- Phosphoric Acids / Amides . *Chem. Eur. J.* **2011**, *17*, 8524–8528.  
<https://doi.org/10.1002/chem.201101157>.
- (17) Melikian, M.; Gramüller, J.; Hioe, J.; Greindl, J.; Gschwind, R. M. No Title. *Chem. Sci.* submitted.
- (18) Renzi, P.; Hioe, J.; Gschwind, R. M. Decrypting Transition States by Light: Photoisomerization as a Mechanistic Tool in Brønsted Acid Catalysis. *J. Am. Chem. Soc.* **2017**, *139* (19), 6752–6760. <https://doi.org/10.1021/jacs.7b02539>.
- (19) Melikian, M.; Gramüller, J.; Hioe, J.; Greindl, J.; Gschwind, R. M. Brønsted Acid Catalysis – the Effect of 3,3'-Substituents on the Structural Space and the Stabilization of Imine/Phosphoric Acid Complexes. *Chem. Sci.* **2019**, *10*, 5226–5234. <https://doi.org/10.1039/c9sc01044k>.
- (20) Rueping, M.; Sugiono, E.; Azap, C.; Theissmann, T.; Bolte, M. Enantioselective Brønsted Acid Catalyzed Transfer Hydrogenation: Organocatalytic Reduction of Imines. *Org. Lett.* **2005**, *7* (17), 3781–3783. <https://doi.org/10.1021/ol0515964>.
- (21) Reid, J. P.; Sigman, M. S. Holistic Prediction of Enantioselectivity in Asymmetric Catalysis. *Nature* **2019**, *571* (7765), 343–348. <https://doi.org/10.1038/s41586-019-1384-z>.
- (22) Feldmeier, C.; Bartling, H.; Riedle, E.; Gschwind, R. M. LED Based NMR Illumination Device for Mechanistic Studies on Photochemical Reactions - Versatile and Simple, yet Surprisingly Powerful. *J. Magn. Reson.* **2013**, *232*, 39–44. <https://doi.org/10.1016/j.jmr.2013.04.011>.
- (23) Tao, J. M.; Perdew, J. P.; Staroverov, V. N.; Scuseria, G. E. Climbing the Density Functional Ladder: Nonempirical Meta-Generalized Gradient Approximation Designed for Molecules and Solids. *Phys. Rev. Lett.* **2003**, *91*, 146401.
- (24) Grimme, S.; Antony, J.; Ehrlich, S.; Krieg, H.; Grimme, S.; Antony, J.; Ehrlich, S.; Krieg, H. A Consistent and Accurate Ab Initio Parametrization of Density Functional Dispersion Correction ( DFT-D ) for the 94 Elements H-Pu. *J. Chem. Phys.* **2010**, *132*, 154104. <https://doi.org/10.1063/1.3382344>.
- (25) Grimme, S. Improved Second-Order Møller – Plesset Perturbation Theory by Separate Scaling of Parallel- and Antiparallel-Spin Pair Correlation Energies. *J. Chem. Phys.* **2003**, *118*, 9095. <https://doi.org/10.1063/1.1569242>.
- (26) Frisch, M. J.; Trucks, G. W.; Schlegel, H. B.; Scuseria, G. E.; Robb, M. A.; Cheeseman, J. R.; Scalmani, G.; Barone, V.; Mennucci, B.; Petersson, G. A.; Nakatsuji, H.; Caricato, M.; Li, X.; Hratchian, H. P.; Izmaylov, A. F.; Bloino, J.; Zheng, G.; Sonnenberg, J. L.; Hada, M.; Ehara, M.; Toyota, K.; Fukuda, R.; Hasegawa, J.; Ishida, M.; T., N.; Honda, Y.; Kitao, O.; Nakai, H.; Vreven, T.; Montgomery, J. A., J.; Peralta, J. E.; Ogliaro, F.; Bearpark, M.; Heyd, J. J.; Brothers, E.; N., K. K.; Staroverov, V. N.; Kobayashi, R.; Normand, J.; Raghavachari, K.; Rendell, A.; Burant, J. C.; Iyengar, S. S.; Tomasi, J.; Cossi, M.; N., R.; Millam, J. M.; Klene, M.; Knox, J. E.; Cross, J. B.; Bakken, V.; Adamo, C.; Jaramillo, J.; Gomperts, R.; Stratmann, R. E.; Yazyev, O.; Austin, A. J.; Cammi, R.; Pomelli, C.; Ochterski, J. W.; Martin, R. L.; Morokuma, K.; Zakrzewski, V. G.; Voth, G. A.; Salvador, P.; Dannenberg, J. J.; Dapprich, S.; Daniels, A. D.; Farkas, O.; Foresman, J. B.; Ortiz, J. V.; Cioslowski, J.; Fox, D. J. Gaussian 09, Revision D.01; Gaussian, Inc.: Wallingford, CT. 2009.
- (27) Neese, F. The ORCA Program System. *Comput. Mol. Sci.* **2012**, *2* (1), 73–78. <https://doi.org/10.1002/wcms.81>.
